# Supplementary material for: Glycosylated extracellular matrix drives immune suppression by modulating macrophage-T cell crosstalk in triple-negative breast cancer
Source: Nat Commun. 2026 Jun 16;17:5008. doi: 10.1038/s41467-026-73467-5 (PMC13273098; doi:10.1038/s41467-026-73467-5)
Supplement: Supplementary file 5 — Supplementary Data 1 [file 41467_2026_73467_MOESM5_ESM.xlsx]

## Sheet: Supplementary_Table_1
Gene expression in log2RPKM
Ensembl.id	Gene.name	Gene.description	Chromosome.scaffold.name	Gene.type	T1352	T1360	T1470	T1560	T1686	T1908	T2037	T2066	T2940	T3000	T1979	T1940	S1352	S1470	S1560	A1908	S2037	A2940	A3000	S1979	T4563	T1740	T02290	T4091	T219	T034	T036	T074	T258	T319	T353	T03359	T02309	T02429	T02667	T4580	T4617	T4683	T4702	T3591
ENSG00000000003	TSPAN6	tetraspanin 6 [Source:HGNC Symbol;Acc:11858]	X	protein_coding	6.61101	5.24259	6.06381	4.71488	4.50189	5.8785	5.77014	5.53755	5.38834	5.29899	4.93877	5.76392	6.86976	7.1563	5.8503	6.4847	6.59353	5.28277	5.76869	6.09284	4.04497	4.98516	6.27266	5.27294	5.1074	4.70428	6.76248	5.35932	5.41093	5.84809	3.92049	5.96224	5.29863	4.57884	7.24072	6.60435	5.45386	4.8622	4.71039	5.0406
ENSG00000000419	DPM1	dolichyl-phosphate mannosyltransferase polypeptide 1, catalytic subunit [Source:HGNC Symbol;Acc:3005]	20	protein_coding	4.05278	3.9651	4.55901	3.98079	4.36177	4.61858	4.14953	4.13687	4.22362	3.75797	4.15423	3.87708	4.44013	4.04534	3.49196	3.30621	3.99996	3.4026	3.9038	3.82261	5.66963	4.47657	5.6782	4.78187	5.13705	4.77017	4.87508	4.14991	5.06722	4.56522	4.5876	4.31178	4.27993	3.90538	4.89449	4.88322	5.16049	4.27648	4.45357	5.16794
ENSG00000000457	SCYL3	SCY1-like 3 (S. cerevisiae) [Source:HGNC Symbol;Acc:19285]	1	protein_coding	5.13158	4.60921	4.44398	4.00066	4.0129	4.56356	5.26857	4.85417	4.88987	5.82002	4.47581	5.45386	4.55805	4.91356	4.39188	4.87892	5.07125	4.77298	4.93471	4.24977	4.56231	4.64335	4.58023	4.55227	4.49506	4.21536	4.17591	4.56163	4.32845	5.30741	4.77583	3.85488	4.83348	4.89542	3.89535	4.31858	3.81671	4.52383	4.03843	3.39262
ENSG00000000460	C1orf112	chromosome 1 open reading frame 112 [Source:HGNC Symbol;Acc:25565]	1	protein_coding	4.38105	3.49431	4.12403	3.86858	3.05435	4.55838	3.40738	3.26969	4.67359	1.9032	3.63682	4.31726	2.30567	2.73362	1.94187	1.7185	2.19867	2.38077	1.79886	1.67658	4.52876	4.45801	4.4057	3.33899	3.9097	3.72338	4.08733	2.52601	5.52708	3.32125	5.19105	4.09226	3.63682	2.81279	4.40473	4.71072	3.2661	4.38487	3.53856	2.82402
ENSG00000000938	FGR	feline Gardner-Rasheed sarcoma viral oncogene homolog [Source:HGNC Symbol;Acc:3697]	1	protein_coding	2.75506	2.48454	1.74516	0.133565	2.79725	3.55617	4.07115	3.03523	3.56579	2.09824	3.90231	2.80499	4.01067	1.25358	2.58723	2.3381	2.2982	3.91429	2.45843	4.06403	2.53736	3.02604	2.16607	4.19348	2.93337	2.64802	2.82518	3.63962	2.86302	2.46641	2.9109	3.20477	3.69074	2.31693	2.22711	2.42104	2.20867	1.73477	4.72002	3.34211
ENSG00000000971	CFH	complement factor H [Source:HGNC Symbol;Acc:4883]	1	protein_coding	4.52843	4.42272	5.48909	4.3305	6.82164	5.74584	6.57886	6.42212	5.74204	6.46863	6.50776	5.59754	6.84008	3.96546	4.56748	5.44072	5.34398	6.73727	5.87321	6.39883	3.32596	4.56652	3.66789	8.57022	6.28673	5.99028	5.66861	6.89173	4.53006	5.42725	4.36811	6.29489	6.8204	5.99708	3.37392	4.20373	5.5674	7.01377	6.40201	5.02114
ENSG00000001036	FUCA2	fucosidase, alpha-L- 2, plasma [Source:HGNC Symbol;Acc:4008]	6	protein_coding	5.5567	5.81968	6.21279	5.52171	6.10547	5.8207	5.87633	5.9367	6.39364	6.18024	5.97835	6.102	5.7514	5.40122	4.95559	5.42821	5.77984	5.66861	5.73721	5.1754	5.15388	5.6145	5.68712	5.29899	5.18288	6.71441	6.17568	5.517	5.57038	5.92475	5.35012	4.3791	6.11609	5.04945	6.85656	5.93966	6.76304	5.62334	6.22453	7.54799
ENSG00000001084	GCLC	glutamate-cysteine ligase, catalytic subunit [Source:HGNC Symbol;Acc:4311]	6	protein_coding	4.77202	5.02612	4.68257	5.12707	4.18061	4.83515	5.0406	4.34864	5.00953	4.29757	5.32741	4.89153	5.74073	4.91946	4.57686	4.5889	4.99905	4.20899	4.63767	4.54791	5.03144	4.53443	4.48205	4.54218	5.23084	5.79828	4.98327	4.61634	6.06264	6.01155	4.71357	5.1933	4.59599	4.72856	4.79538	4.63442	4.25583	5.14322	4.52256	5.17865
ENSG00000001167	NFYA	nuclear transcription factor Y, alpha [Source:HGNC Symbol;Acc:7804]	6	protein_coding	6.07411	5.59871	6.29574	5.92475	5.88333	5.62985	5.6964	6.14361	6.9523	4.63154	4.80231	6.55893	5.014	5.99782	5.9464	5.70951	5.81039	5.81248	5.23944	5.50224	5.31059	5.52077	6.93439	5.44678	5.43704	5.40702	5.44108	5.95041	6.87705	6.01847	5.90412	6.50108	6.00688	5.69474	5.62575	4.87477	5.23405	7.11134	5.24392	6.14236
ENSG00000001460	STPG1	sperm-tail PG-rich repeat containing 1 [Source:HGNC Symbol;Acc:28070]	1	protein_coding	3.64601	3.17878	1.73674	1.70829	1.95329	1.62688	2.09942	1.45835	2.43335	2.36855	2.15401	2.78161	3.10204	2.3576	2.09646	2.01068	2.747	1.45624	2.05533	2.41551	3.50764	1.95329	3.30039	2.01231	3.26113	2.7214	2.20634	1.56101	1.96253	1.95412	3.66091	3.64179	2.02373	2.12928	2.91904	1.215	2.89445	3.46048	1.76987	1.16997
ENSG00000001461	NIPAL3	NIPA-like domain containing 3 [Source:HGNC Symbol;Acc:25233]	1	protein_coding	6.99938	6.21113	4.48404	5.16278	4.49506	3.85447	4.54987	5.73062	5.36538	5.31644	5.35537	5.79468	4.65297	5.45339	5.88919	5.67	5.76599	5.67609	5.64854	5.59095	5.22957	3.13539	6.17735	4.42828	5.72641	5.22639	4.75728	5.09578	4.02246	4.6739	5.71515	6.59666	5.47515	5.42623	5.73721	3.38195	5.66409	4.73966	4.99328	4.32347
ENSG00000001497	LAS1L	LAS1-like (S. cerevisiae) [Source:HGNC Symbol;Acc:25726]	X	protein_coding	4.99608	5.24676	5.43544	5.62026	4.53822	5.61693	5.53585	5.20252	5.32472	4.95355	5.4697	5.25888	4.98587	5.3039	5.10322	5.12328	5.17078	4.71518	5.12872	5.14603	5.55736	6.25179	5.59299	5.13509	5.74171	5.51595	5.3528	4.87315	6.28153	5.17339	6.00569	5.41345	5.09232	4.88735	6.31135	6.32737	5.58539	5.82381	5.19955	4.79787
ENSG00000001561	ENPP4	ectonucleotide pyrophosphatase/phosphodiesterase 4 (putative) [Source:HGNC Symbol;Acc:3359]	6	protein_coding	7.3245	5.94933	4.41543	2.53466	4.70461	3.89335	4.93649	3.87587	4.90447	4.7831	4.50973	5.60195	6.18619	4.92288	4.65297	4.21645	5.08123	5.10988	5.02151	5.27623	3.39823	4.85136	4.60215	3.2933	4.54791	5.40278	5.29997	4.81006	3.84387	4.32213	4.37608	5.52171	4.83977	3.40167	5.51774	3.33069	4.46698	2.75203	5.63477	4.08837
ENSG00000001617	SEMA3F	sema domain, immunoglobulin domain (Ig), short basic domain, secreted, (semaphorin) 3F [Source:HGNC Symbol;Acc:10728]	3	protein_coding	4.44398	3.78599	5.67407	3.07343	4.25012	5.38999	4.86764	4.53443	4.72232	4.98552	4.15287	4.51044	5.70591	5.6512	5.10988	5.56937	5.92335	5.24644	4.95498	4.78988	5.26451	4.92104	5.0481	5.60195	4.69884	6.50048	4.96922	4.91633	4.72559	4.9457	4.66681	5.05498	4.71357	6.35739	7.45348	5.67106	5.90376	5.59028	5.50702	4.75728
ENSG00000001629	ANKIB1	ankyrin repeat and IBR domain containing 1 [Source:HGNC Symbol;Acc:22215]	7	protein_coding	6.25547	6.8731	6.75242	5.47814	6.93375	6.38265	6.11263	6.33514	6.48959	6.86516	6.32958	6.75421	6.10589	6.38585	5.7134	5.78384	6.07411	5.89441	5.74204	5.69955	6.19462	6.63408	6.74187	5.88591	6.26881	7.00302	6.77769	5.97531	6.61833	6.79718	6.33813	6.26706	5.99855	6.15357	6.00766	6.82102	6.92826	5.89055	6.10668	6.71836
ENSG00000001630	CYP51A1	cytochrome P450, family 51, subfamily A, polypeptide 1 [Source:HGNC Symbol;Acc:2649]	7	protein_coding	6.38309	6.89748	6.87574	5.48942	7.09764	6.54973	6.29532	6.73005	5.98456	8.65158	6.61678	6.98719	5.64112	6.52589	6.25061	6.02384	6.45895	5.97118	6.80463	6.16888	6.46076	6.77462	6.53767	6.083	6.51255	8.32859	6.92695	5.86733	6.52778	7.96859	6.37448	5.82528	6.13471	7.2551	7.65513	7.90932	6.75054	5.32248	5.56263	6.02
ENSG00000001631	KRIT1	KRIT1, ankyrin repeat containing [Source:HGNC Symbol;Acc:1573]	7	protein_coding	5.32347	4.72461	5.25238	4.84779	5.6274	5.25394	4.9842	5.25919	5.16018	5.62467	5.03969	5.35249	5.08686	5.39261	5.15986	5.07443	4.94167	5.3913	4.99023	4.95296	5.509	5.04626	5.82414	5.23944	4.95623	6.2425	4.97217	5.29633	5.3125	5.70404	4.94509	5.16501	5.26114	5.22795	5.00984	5.6896	5.57426	5.27172	5.01918	5.21126
ENSG00000002016	RAD52	RAD52 homolog (S. cerevisiae) [Source:HGNC Symbol;Acc:9824]	12	protein_coding	2.70495	2.88009	2.81701	2.42639	2.72578	2.46914	2.12854	2.28075	3.00014	2.52729	2.35681	2.20403	2.66442	2.60326	2.65742	2.9109	2.45511	3.30865	2.2794	2.02028	2.61629	2.88834	3.46845	3.32965	2.30704	1.76511	1.48255	2.95272	3.92538	2.69054	2.52402	2.79785	2.94836	4.14192	3.88887	2.98548	2.02539	3.53338	2.38001	2.72081
ENSG00000002330	BAD	BCL2-associated agonist of cell death [Source:HGNC Symbol;Acc:936]	11	protein_coding	4.6562	5.27891	4.90289	4.1503	4.38893	4.1872	4.49443	4.82325	4.5529	5.14541	4.68319	4.49673	5.10396	4.74002	4.52222	4.47267	4.63315	4.31794	4.66968	4.20658	4.82668	4.82668	4.7614	4.7311	5.08652	4.62182	4.8713	4.33114	5.24676	4.74287	4.487	5.38459	4.40671	3.76168	5.79433	5.3417	4.90964	4.473	4.28779	5.42364
ENSG00000002549	LAP3	leucine aminopeptidase 3 [Source:HGNC Symbol;Acc:18449]	4	protein_coding	6.6063	6.2892	6.04377	5.31895	6.97279	9.10572	6.63226	6.70811	7.36709	6.88556	7.24932	6.82538	6.74938	5.69707	6.00729	6.50048	5.64407	7.00229	6.50726	6.28964	6.21113	6.12764	4.85104	6.197	6.90797	6.10317	5.96224	6.89557	5.79536	5.97046	6.94749	6.75827	6.65983	6.40915	5.53992	5.77285	5.55602	4.45431	8.26014	5.83957
ENSG00000002586	CD99	CD99 molecule [Source:HGNC Symbol;Acc:7082]	X	protein_coding	4.31369	6.72457	5.78165	6.10089	7.43181	5.37806	7.25319	6.63124	6.28543	7.55546	6.82602	6.70694	7.32167	5.05211	4.95457	6.3078	6.30146	6.2166	6.3437	5.97759	4.8622	6.30146	6.73439	6.91951	6.25927	7.6667	6.61101	7.01102	5.25888	7.17329	5.91238	6.56517	6.42543	7.22709	6.30146	6.19174	7.67902	7.93376	6.15315	7.36709
ENSG00000002587	HS3ST1	heparan sulfate (glucosamine) 3-O-sulfotransferase 1 [Source:HGNC Symbol;Acc:5194]	4	protein_coding	2.76507	2.64165	2.05294	3.42085	2.97293	1.72049	1.72989	1.87175	3.08514	3.99413	3.32021	2.62924	1.88269	2.83829	3.67867	3.91387	1.90401	3.41931	2.89903	2.28518	2.26555	2.37066	5.55984	1.82463	3.7107	3.46711	3.57896	2.58136	3.35274	3.15759	2.62401	2.22925	2.55523	2.24066	2.32962	1.79982	1.87349	1.64599	3.37947	2.8541
ENSG00000002726	AOC1	amine oxidase, copper containing 1 [Source:HGNC Symbol;Acc:80]	7	protein_coding	1.09491	-0.234747	-2.16052	-0.225497	2.63239	1.15649	-0.541482	0.742807	0.263834	-0.561869	-0.131824	0.539311	-0.825923	-1.59982	-2.17897	-1.90926	-3.07457	0.168485	-1.30325	-2.74546	-0.996327	-1.4384	-2.23391	-1.1708	0.476203	-0.643018	-1.06269	1.12126	1.99188	-1.21555	-0.862526	3.70944	1.07897	0.133565	6.36654	-1.28235	1.69831	-1.54675	-0.342972	1.25358
ENSG00000002746	HECW1	HECT, C2 and WW domain containing E3 ubiquitin protein ligase 1 [Source:HGNC Symbol;Acc:22195]	7	protein_coding	1.32881	1.22988	0.343065	2.55833	2.19415	1.32741	3.36771	-2.54821	0.468305	0.581363	0.932452	-1.51433	-0.788226	3.07561	0.546957	0.476203	2.14549	-0.761069	-0.521797	0.0561943	-0.40425	1.95329	0.885505	-0.891104	-0.0702453	1.20318	1.81927	-0.841594	-1.52668	-1.86361	3.22173	1.94361	-2.49148	-1.14884	-2.04984	1.23251	2.23221	0.909903	0.562343	4.41115
ENSG00000002822	MAD1L1	MAD1 mitotic arrest deficient-like 1 (yeast) [Source:HGNC Symbol;Acc:6762]	7	protein_coding	4.78988	4.49348	4.53722	5.95117	4.57555	5.91311	4.59442	3.39262	4.63057	4.23728	4.64947	5.3686	3.96546	4.29757	3.79705	3.43142	3.85146	3.37251	3.76323	3.80663	5.4151	5.98271	4.57686	4.25657	4.89809	4.36415	5.00661	4.27128	5.67961	4.58826	5.5531	5.41766	4.60116	3.70209	5.17273	4.28443	4.92984	4.74129	4.8648	5.96009
ENSG00000002834	LASP1	LIM and SH3 protein 1 [Source:HGNC Symbol;Acc:6513]	17	protein_coding	6.58097	5.3657	6.58729	6.83307	7.5759	8.10257	8.30977	7.50529	7.23366	7.32977	7.57348	6.89491	7.52017	7.04031	7.21076	7.59361	7.6892	7.40294	7.28293	7.12095	6.5915	7.2733	7.84628	7.69589	7.74508	7.88182	7.00524	7.52515	7.45573	7.3446	6.99861	7.52818	7.36917	7.28664	8.43913	6.81976	7.66524	7.19851	7.79356	7.84453
ENSG00000002919	SNX11	sorting nexin 11 [Source:HGNC Symbol;Acc:14975]	17	protein_coding	4.06582	4.55612	4.17833	3.89455	4.53539	4.62245	4.94266	4.46533	4.39294	4.39155	5.09609	4.7771	5.03647	4.26703	4.23761	4.29046	4.65715	4.83217	4.65398	4.40736	4.54434	5.30198	4.15491	4.25012	4.77741	4.09617	3.90575	4.33751	5.44572	4.03881	4.93532	4.354	4.5989	4.05428	4.32055	3.77297	3.92354	3.87747	4.7695	4.44174
ENSG00000002933	TMEM176A	transmembrane protein 176A [Source:HGNC Symbol;Acc:24930]	7	protein_coding	4.34725	4.50158	7.19267	4.51901	6.20263	5.45422	5.61375	6.88368	6.41599	5.11348	5.52139	5.41892	5.56673	6.47626	5.09139	5.61592	3.97615	5.8739	5.41345	4.73743	3.00128	5.23054	3.95627	5.43704	5.53416	7.41292	5.5531	6.5778	4.97619	4.54987	6.17529	7.29632	5.4388	4.63185	8.1527	3.74635	4.66744	1.86425	6.39154	7.61285
ENSG00000003056	M6PR	mannose-6-phosphate receptor (cation dependent) [Source:HGNC Symbol;Acc:6752]	12	protein_coding	6.50197	8.57837	7.94332	6.02	7.44169	7.1563	6.661	7.43181	7.27532	6.59619	7.14017	6.55532	6.70694	7.47602	7.15119	7.37664	7.11297	7.27824	6.81863	6.7836	6.57232	7.93758	7.30156	7.25903	6.66711	6.78072	6.58783	7.32067	8.46308	7.16992	6.8572	7.02835	7.55677	6.58928	6.91256	6.80283	6.51203	6.11424	7.50757	6.8192
ENSG00000003096	KLHL13	kelch-like family member 13 [Source:HGNC Symbol;Acc:22931]	X	protein_coding	1.55332	3.27833	6.14598	4.27411	-0.414041	0.675564	1.377	4.84779	2.58469	0.482443	1.88815	2.21193	3.3626	5.81039	5.57673	5.65814	4.99449	4.02053	5.3144	4.51172	3.12693	5.31803	4.18477	4.28345	2.29122	0.182555	2.87292	2.67657	4.8485	3.28905	4.84293	0.208555	4.447	1.42603	2.49105	5.51131	3.22827	3.06623	-1.63168	2.4197
ENSG00000003137	CYP26B1	cytochrome P450, family 26, subfamily B, polypeptide 1 [Source:HGNC Symbol;Acc:20581]	2	protein_coding	1.46164	1.48143	2.07607	5.49293	3.82769	2.18761	2.16061	2.90967	2.67595	2.89903	2.32006	1.93779	5.32378	1.7357	2.47445	1.45047	3.67867	3.67177	3.42364	2.97763	4.8157	2.44369	1.96874	2.8682	5.52338	3.89494	3.13801	3.06505	3.25246	2.70873	4.78414	2.56811	1.96172	1.62892	2.89958	3.24324	3.25547	3.67603	2.77791	4.40341
ENSG00000003147	ICA1	islet cell autoantigen 1, 69kDa [Source:HGNC Symbol;Acc:5343]	7	protein_coding	4.9377	4.62927	4.35766	1.26004	4.2048	1.66181	4.88164	3.79503	3.65971	5.69378	4.08299	4.58603	3.99043	4.01107	3.95474	3.54178	4.86541	3.35672	3.77062	4.00503	5.10772	3.87668	3.83474	3.83553	4.41833	4.50392	4.36845	3.3987	3.84863	4.74799	4.46886	3.71378	3.79111	3.5232	4.45872	4.41803	4.67995	1.77557	3.37344	3.34054
ENSG00000003249	DBNDD1	dysbindin (dystrobrevin binding protein 1) domain containing 1 [Source:HGNC Symbol;Acc:28455]	16	protein_coding	7.19352	6.6473	4.14576	6.21995	4.8648	3.60867	4.1788	4.95296	5.03714	5.41447	3.81829	4.5587	2.29889	3.22279	3.45554	2.63042	4.03302	1.71242	2.50323	2.3043	4.95772	4.95112	5.96189	2.859	5.37548	3.92049	3.98563	2.9045	4.05691	5.509	5.064	4.85136	3.60698	4.32117	4.51933	5.90055	4.66455	3.77425	3.56712	2.00548
ENSG00000003393	ALS2	amyotrophic lateral sclerosis 2 (juvenile) [Source:HGNC Symbol;Acc:443]	2	protein_coding	4.8741	4.59953	4.63315	6.55271	4.56389	3.93286	4.81601	4.73551	3.99221	4.53104	4.12076	4.36845	4.62182	4.96658	4.84714	4.73835	4.87162	4.76914	4.61408	4.47237	5.20738	4.93877	5.28735	4.91854	5.82207	5.18878	5.42124	4.77583	5.20934	4.21369	4.81914	5.84382	4.94104	5.32671	5.09516	5.31218	4.93678	5.12448	4.50908	3.85768
ENSG00000003400	CASP10	caspase 10, apoptosis-related cysteine peptidase [Source:HGNC Symbol;Acc:1500]	2	protein_coding	3.59872	2.87292	3.08725	2.71713	3.35036	5.80243	5.54122	4.2751	5.17339	4.0957	4.71135	4.16261	5.01918	3.05221	3.7172	4.38347	2.97066	5.12387	4.46565	4.39749	2.23762	3.36867	2.53528	4.50712	4.18202	3.64307	4.22972	5.26114	2.55589	5.10867	3.37251	2.62542	4.57464	4.33884	1.66181	3.3369	3.65711	2.05613	6.4995	2.78452
ENSG00000003402	CFLAR	CASP8 and FADD-like apoptosis regulator [Source:HGNC Symbol;Acc:1876]	2	protein_coding	7.4018	7.16667	6.7459	6.34998	6.98251	7.04844	7.29357	7.41394	7.58874	7.07915	7.68189	7.24072	8.54097	7.22183	7.86924	7.57221	7.47479	8.3018	7.88001	8.22486	6.72786	6.71033	6.27017	7.29048	6.68863	6.71085	7.76418	8.07181	6.28793	7.24745	6.3256	6.62144	8.09812	7.82896	5.60884	6.52042	6.21582	6.44328	8.62047	5.83136
ENSG00000003436	TFPI	tissue factor pathway inhibitor (lipoprotein-associated coagulation inhibitor) [Source:HGNC Symbol;Acc:11760]	2	protein_coding	2.79785	3.9224	4.42794	2.52023	2.75007	5.88292	4.93912	4.8182	3.26969	3.15337	4.23695	3.27432	6.45338	4.62959	4.81257	5.40569	4.78031	6.10317	5.90447	5.84702	2.32533	3.58415	2.56948	5.44964	3.58679	3.20327	2.46838	4.46886	3.04283	3.95474	2.47445	2.68935	4.23728	3.69406	2.15987	2.64676	4.03768	3.10204	3.88407	3.95055
ENSG00000003509	NDUFAF7	NADH dehydrogenase (ubiquinone) complex I, assembly factor 7 [Source:HGNC Symbol;Acc:28816]	2	protein_coding	3.80349	3.21925	3.12529	3.05692	4.03985	2.63958	3.66524	3.52059	3.12693	2.95324	3.43971	3.74676	3.37154	3.00711	3.23966	3.18695	3.37392	3.57767	3.17926	3.09255	3.8621	3.78007	3.44622	3.13487	3.50623	3.16321	3.19046	3.51878	3.6997	3.31194	4.02515	3.67562	3.70061	3.35081	3.59266	3.39636	3.73827	3.16693	3.38042	3.67907
ENSG00000003756	RBM5	RNA binding motif protein 5 [Source:HGNC Symbol;Acc:9902]	3	protein_coding	6.58729	5.78453	6.34913	6.81681	6.26177	5.91387	6.12133	6.86272	6.27782	5.92612	6.73727	6.57395	6.91688	7.03126	7.41088	7.52131	7.08161	7.81026	7.10172	7.42489	5.65327	5.59871	6.37406	7.25231	5.73218	6.43617	5.88665	7.36323	5.45202	6.23159	5.88591	6.45611	7.45021	7.56548	5.79828	6.69685	5.78813	6.44921	6.7453	5.65288
ENSG00000003989	SLC7A2	solute carrier family 7 (cationic amino acid transporter, y+ system), member 2 [Source:HGNC Symbol;Acc:11060]	8	protein_coding	1.96963	2.3659	5.76528	5.06468	2.17245	2.23994	4.33517	4.95712	1.59847	5.72994	3.88108	5.45171	6.67642	6.48654	6.41232	6.99641	9.31296	6.46863	6.02979	7.11134	1.75869	1.99536	1.60179	6.40056	2.55653	4.53006	3.46755	5.38935	3.88848	4.5078	1.10192	1.60179	4.89121	3.76501	1.52105	4.15102	1.57295	4.44536	1.93861	5.30871
ENSG00000004059	ARF5	ADP-ribosylation factor 5 [Source:HGNC Symbol;Acc:658]	7	protein_coding	7.04471	7.94872	8.16206	7.3188	7.81026	8.01073	8.14111	7.90376	7.46284	8.39543	7.66816	8.24742	7.18037	7.69589	7.39257	7.20456	7.61825	7.02762	7.30842	7.20639	7.81194	7.41911	7.46735	7.71404	7.77388	6.43347	7.84977	7.23622	7.77388	7.70492	7.57725	8.05036	7.51896	7.25807	7.91491	7.82042	7.00524	7.01669	6.77517	7.19434
ENSG00000004139	SARM1	sterile alpha and TIR motif containing 1 [Source:HGNC Symbol;Acc:17074]	17	protein_coding	2.11614	6.11093	3.16741	4.49223	4.81006	3.01034	3.35222	4.06513	3.59179	2.90691	3.42315	2.81506	4.07231	4.19753	4.82171	4.83819	4.22768	4.7771	4.574	4.67196	4.24202	2.05954	1.89781	3.44989	3.21075	2.86193	3.63248	4.16967	1.88902	3.00765	4.99083	3.19651	4.3804	3.06566	2.67534	4.6841	2.53466	4.57718	3.58816	2.28745
ENSG00000004142	POLDIP2	polymerase (DNA-directed), delta interacting protein 2 [Source:HGNC Symbol;Acc:23781]	17	protein_coding	6.04689	6.98651	6.41143	5.60016	6.3118	6.41646	6.63517	6.09512	6.10356	6.25061	6.13154	6.98114	6.5667	6.39154	6.29532	6.21034	6.47336	6.09512	6.50439	6.27479	6.5778	6.90597	5.94894	6.401	6.08636	6.35694	5.99973	5.86258	6.69411	6.09548	6.94369	6.16846	6.0525	5.7037	6.55271	6.32517	6.10126	6.02747	6.23119	6.84895
ENSG00000004399	PLXND1	plexin D1 [Source:HGNC Symbol;Acc:9107]	3	protein_coding	6.45656	7.02123	7.84279	7.29357	7.54558	7.57851	7.9965	7.15026	6.82342	6.74353	7.23965	6.75299	7.93186	7.08161	6.68707	7.35707	6.48106	7.83413	6.98382	7.19267	6.78478	6.16667	6.66711	7.61688	7.0848	7.23537	6.86333	7.3839	7.37022	6.82538	5.72235	6.9028	7.49058	6.99861	5.77171	6.40829	7.32067	8.85946	7.10729	9.13556
ENSG00000004455	AK2	adenylate kinase 2 [Source:HGNC Symbol;Acc:362]	1	protein_coding	6.47676	6.92695	6.46371	6.03516	5.7888	6.48379	6.53462	5.85066	6.80525	6.41232	6.5662	6.42212	6.00342	6.15157	5.76251	5.58814	5.91162	5.54287	5.97759	5.77667	8.12964	7.19933	5.93458	6.48379	5.76359	5.64854	5.45298	5.67609	6.17021	6.51155	7.29844	6.41646	6.34329	6.20303	6.65337	5.65744	6.36697	6.95999	6.30312	6.13964
ENSG00000004468	CD38	CD38 molecule [Source:HGNC Symbol;Acc:1667]	4	protein_coding	3.10528	2.39698	2.12233	0.460199	1.68622	5.92543	3.51042	3.13801	5.6547	2.2822	4.78477	4.5992	3.31055	0.417902	1.23817	2.7398	-0.541482	3.74836	3.06084	2.42442	1.8101	4.24793	2.49932	2.82053	3.9845	0.877298	2.87533	4.22085	0.972335	3.72218	3.70782	2.94948	3.13076	2.86534	0.751064	1.03932	2.02875	-1.32972	7.43079	1.65493
ENSG00000004478	FKBP4	FK506 binding protein 4, 59kDa [Source:HGNC Symbol;Acc:3720]	12	protein_coding	6.91193	9.10719	8.64113	6.40201	7.64127	8.68345	7.23709	7.41191	7.88001	7.59611	6.5306	7.05235	5.73357	7.93758	7.16323	7.81702	7.54298	7.02609	6.93862	6.96405	8.08489	8.69424	7.85857	7.60597	6.30187	7.12614	7.06963	6.87038	8.89678	9.13054	7.51896	7.06568	7.31443	8.78006	9.53229	7.05767	7.0927	7.02688	6.55532	6.78129
ENSG00000004487	KDM1A	lysine (K)-specific demethylase 1A [Source:HGNC Symbol;Acc:29079]	1	protein_coding	6.54305	6.65283	6.80651	6.79419	6.22275	5.96678	6.38982	6.29617	6.23119	5.71236	6.15157	6.80774	5.21576	6.35972	6.06416	6.19941	6.26218	5.7404	5.90872	5.71548	7.82896	6.90922	7.25706	6.48959	6.28543	6.00729	6.55222	6.09747	7.34686	5.80671	7.53935	7.3046	6.36059	6.29755	7.56284	6.01885	6.77152	7.61825	5.84737	6.71496
ENSG00000004534	RBM6	RNA binding motif protein 6 [Source:HGNC Symbol;Acc:9903]	3	protein_coding	5.36795	4.51667	5.62837	5.44572	5.56542	5.04945	5.12328	5.69157	5.68201	4.89646	5.53146	5.43405	5.49733	5.71304	5.85392	5.93388	5.77402	6.55378	5.47144	6.0587	5.72167	5.01015	5.81039	6.43758	4.78383	5.87565	5.66829	6.62707	5.84242	5.54944	5.60776	5.49182	6.59462	7.03512	5.21187	6.38115	5.31026	6.25345	6.37225	5.71441
ENSG00000004660	CAMKK1	calcium/calmodulin-dependent protein kinase kinase 1, alpha [Source:HGNC Symbol;Acc:1469]	17	protein_coding	3.61723	2.63239	3.34413	2.78809	3.87093	1.60913	2.8579	2.76876	1.87541	2.4509	3.66011	3.725	3.3517	3.03195	2.81996	2.98929	3.3836	2.45911	3.63248	3.1926	3.62226	2.83769	1.99188	2.09824	1.0979	4.0887	2.73919	2.33031	2.01402	3.7759	3.88489	4.00882	2.89788	4.12441	0.946574	3.75153	4.54403	1.96091	2.69928	3.3836
ENSG00000004700	RECQL	RecQ protein-like (DNA helicase Q1-like) [Source:HGNC Symbol;Acc:9948]	12	protein_coding	5.18581	6.32915	6.46711	5.04909	6.62976	5.57706	5.76908	6.15801	5.9135	5.89055	5.97262	5.08558	5.86776	5.67176	5.13253	4.9753	5.09107	5.59653	5.36267	5.26644	4.91268	5.46869	5.62805	5.68506	5.0114	5.84531	5.28312	5.93352	7.13026	6.19253	5.7404	6.13513	5.83027	4.95683	5.29934	5.51227	5.84207	4.87508	5.86115	5.98233
ENSG00000004766	CCDC132	coiled-coil domain containing 132 [Source:HGNC Symbol;Acc:25956]	7	protein_coding	4.66968	4.14402	4.63442	3.12908	4.84809	5.06305	4.55711	4.18826	4.63884	5.53787	4.86251	4.77553	4.04175	4.9374	4.44666	4.43787	4.67737	4.51467	4.59859	4.32478	5.18288	4.62634	4.89183	4.41701	4.92288	5.94894	4.7311	4.25619	4.81601	5.25077	4.73334	4.50908	4.56874	4.28916	4.29691	4.33751	5.31644	3.72459	4.39749	4.61538
ENSG00000004776	HSPB6	heat shock protein, alpha-crystallin-related, B6 [Source:HGNC Symbol;Acc:26511]	19	protein_coding	0.0889864	1.09927	3.42178	0.466352	3.3149	0.114479	2.14255	3.52811	2.8032	0.415814	2.5605	1.11999	8.38688	2.42039	3.21821	5.3623	4.16071	5.62676	6.02346	6.62257	0.319178	1.53176	-0.139898	4.01556	3.14659	0.593061	0.682438	4.25145	0.161083	4.66391	-0.579246	1.55332	4.41701	2.16061	0.0318332	1.68714	1.62688	-2.20601	2.17499	6.35124
ENSG00000004777	ARHGAP33	Rho GTPase activating protein 33 [Source:HGNC Symbol;Acc:23085]	19	protein_coding	4.69986	2.57174	1.68913	4.50816	2.71898	2.87412	2.45165	2.77495	3.18246	1.91191	2.58599	2.83077	2.83417	3.09791	3.75272	3.57673	3.40121	3.95055	3.17418	3.38929	3.20425	4.97021	5.31609	3.68833	2.53665	2.43982	2.8032	3.77507	2.62476	3.23544	3.69406	4.07582	3.30474	4.27922	3.51406	4.23556	4.56555	4.62408	2.38655	3.29635
ENSG00000004779	NDUFAB1	NADH dehydrogenase (ubiquinone) 1, alpha/beta subcomplex, 1, 8kDa [Source:HGNC Symbol;Acc:7694]	16	protein_coding	4.96363	4.64881	4.25855	3.74676	4.18687	4.86603	4.51933	4.06099	4.24613	4.51965	3.37578	3.73192	4.36517	4.03342	3.31394	3.19483	3.70168	3.19806	3.53624	3.08514	4.14438	4.04352	4.27993	2.97574	4.97051	3.91275	3.92466	2.79294	4.3365	3.94847	3.63921	4.0966	2.68997	3.0815	4.23591	4.76035	4.08333	3.04609	3.42223	3.52059
ENSG00000004799	PDK4	pyruvate dehydrogenase kinase, isozyme 4 [Source:HGNC Symbol;Acc:8812]	7	protein_coding	5.969	4.03082	5.63873	2.23837	1.19349	3.20013	7.68784	5.82414	4.13045	2.55523	7.52397	5.80748	10.0659	7.83068	7.64797	7.88726	9.15073	7.84977	7.32266	9.90581	4.47812	2.10694	4.07079	6.59462	6.08027	5.19921	4.37471	6.8003	5.11546	7.57221	2.87591	4.92674	8.03979	4.53104	1.45624	5.06168	4.43183	3.88537	5.85102	4.63767
ENSG00000004838	ZMYND10	zinc finger, MYND-type containing 10 [Source:HGNC Symbol;Acc:19412]	3	protein_coding	0.818011	-1.11395	-0.58586	0.392776	0.860428	-0.0804771	1.4119	-0.89958	-0.647829	-0.411063	0.0756536	0.276813	0.0166287	0.689567	-0.208264	0.914847	4.1327	0.845921	0.323338	0.0889864	2.2353	0.107199	2.7214	1.463	1.06474	1.10061	-0.933024	0.352101	3.13639	-0.281754	1.98343	1.11289	0.0889864	1.43059	2.26268	-0.592693	3.94847	2.03496	-0.0528097	-0.0175886
ENSG00000004846	ABCB5	ATP-binding cassette, sub-family B (MDR/TAP), member 5 [Source:HGNC Symbol;Acc:46]	7	protein_coding	-3.29034	-1.33999	-2.71915	-1.86361	-1.64436	-2.1243	-1.97756	-1.45651	-4.24608	-3.51182	-0.885774	-4.1946	2.3659	-1.86361	-0.508743	2.09646	-0.122492	2.53315	2.49105	0.699098	-2.73246	-0.737393	-0.534745	2.10612	-0.603935	-2.83772	0.102003	-3.51182	-3.40024	-1.27667	-3.40024	-0.925197	-1.35712	0.921122	-2.1243	-2.03275	-3.92648	-1.21555	-3.29034	-1.63779
ENSG00000004864	SLC25A13	solute carrier family 25 (aspartate/glutamate carrier), member 13 [Source:HGNC Symbol;Acc:10983]	7	protein_coding	5.35571	4.43151	4.96623	4.54791	5.87565	5.33297	5.28475	5.16983	5.07306	6.35206	4.69152	5.13095	3.97769	4.35436	4.04136	3.91312	4.07547	3.78127	4.04674	3.86544	5.27263	5.39033	5.25238	4.12367	4.34567	6.27479	5.22349	4.20241	5.54771	6.15441	5.02763	5.43578	4.86117	4.5941	5.65185	5.62026	5.51367	4.11814	4.06284	4.59987
ENSG00000004866	ST7	suppression of tumorigenicity 7 [Source:HGNC Symbol;Acc:11351]	7	protein_coding	3.98308	4.20726	4.02588	3.76365	3.85065	4.84519	4.17696	3.17774	4.21369	4.02285	3.51688	4.44828	3.53295	3.26413	3.29236	3.12583	3.04545	3.06348	3.41199	3.11939	4.08366	3.97615	4.26637	3.6033	3.88736	3.31291	4.10831	2.8475	5.29536	4.84075	4.34219	3.9337	3.02604	3.64481	4.4778	3.7029	3.86936	3.28545	3.9291	3.96854
ENSG00000004897	CDC27	cell division cycle 27 [Source:HGNC Symbol;Acc:1728]	17	protein_coding	4.81914	5.66134	5.55278	5.59331	5.88292	5.72278	5.79709	5.59411	5.59977	5.12707	5.9593	6.1456	6.05175	5.32506	5.53485	5.64711	5.53617	5.71407	5.61759	5.57038	5.7243	6.06751	6.01926	5.6361	6.03159	5.75717	5.50294	5.72134	6.69796	5.27327	6.53163	5.94967	5.66096	5.12093	5.32087	5.90412	5.39162	5.65327	5.82989	5.82207
ENSG00000004961	HCCS	holocytochrome c synthase [Source:HGNC Symbol;Acc:4837]	X	protein_coding	4.39718	4.73613	3.92354	3.92949	3.10421	4.80838	4.34048	3.63076	4.13003	4.31656	3.61863	4.98048	4.23521	3.82691	3.60991	3.82261	3.5781	3.48924	3.83078	3.67948	4.10109	4.32347	4.42859	3.3696	4.43183	4.70394	4.77298	3.74676	3.94975	4.00432	4.32622	4.1532	4.29968	4.07619	4.96824	4.42272	4.3365	3.75843	4.6841	4.22589
ENSG00000004975	DVL2	dishevelled segment polarity protein 2 [Source:HGNC Symbol;Acc:3086]	17	protein_coding	5.04909	5.01371	5.56607	5.36828	5.65611	5.10516	4.61311	5.07473	5.25855	4.90752	5.58116	5.53045	5.4841	5.7539	5.90376	5.87892	5.67407	5.71821	5.73136	5.79468	5.20804	5.7888	6.44921	6.28673	5.84809	5.64407	5.65945	5.71618	5.97008	5.35996	5.81531	5.89441	5.46672	5.47712	6.51945	5.91422	5.69707	6.09018	5.13475	5.60776
ENSG00000005001	PRSS22	protease, serine, 22 [Source:HGNC Symbol;Acc:14368]	16	protein_coding	3.34358	3.03746	4.0077	-1.25583	3.34756	5.56971	3.2737	3.63773	3.18893	4.04534	4.54828	3.82731	-0.28849	4.0243	3.76008	2.33661	2.85119	1.59847	3.40874	3.41931	2.07383	3.67308	2.82113	1.73369	1.74122	3.99486	4.04136	2.31265	0.175379	4.35732	1.82784	2.45778	2.91633	3.18942	2.1102	1.75691	3.65929	1.32385	4.42272	1.31315
ENSG00000005007	UPF1	UPF1 regulator of nonsense transcripts homolog (yeast) [Source:HGNC Symbol;Acc:9962]	19	protein_coding	7.29944	7.40078	7.07045	7.33189	7.37664	7.02762	7.37877	7.34105	7.21361	6.85533	7.36323	7.61825	6.82477	7.13935	6.95165	7.26273	7.32758	7.14379	7.07378	7.16667	7.69589	6.97344	7.09046	7.34885	7.09121	7.18458	7.17783	7.19678	7.12379	6.87434	8.69424	7.30936	7.18278	7.18823	7.95491	6.77094	7.20724	7.03949	7.16992	6.8578
ENSG00000005020	SKAP2	src kinase associated phosphoprotein 2 [Source:HGNC Symbol;Acc:15687]	7	protein_coding	5.49008	3.44349	4.38893	5.07035	5.02887	5.86897	5.10289	4.64978	5.26179	3.79545	5.25982	5.75682	5.45766	4.36484	4.92288	4.67963	4.5036	5.08652	4.88735	4.982	3.21126	4.27683	3.9651	4.62343	4.57275	5.9293	4.63185	4.99176	4.74892	5.09232	5.50359	4.49925	4.85698	4.12222	5.29633	3.18746	4.36745	3.05435	5.51066	5.55248
ENSG00000005022	SLC25A5	solute carrier family 25 (mitochondrial carrier; adenine nucleotide translocator), member 5 [Source:HGNC Symbol;Acc:10991]	X	protein_coding	9.58115	9.61131	9.38399	8.88422	8.19545	9.89651	9.42731	8.92655	8.99717	9.09105	8.77621	9.31873	7.97056	8.4661	8.06965	7.96466	8.11828	7.84453	8.20517	7.99852	8.98814	9.26769	9.25662	8.80732	7.98845	8.53776	9.05744	8.12054	8.8884	9.68509	9.38399	9.86003	8.6035	8.12054	9.32453	10.0237	9.73251	7.88544	8.37838	8.60688
ENSG00000005059	CCDC109B	coiled-coil domain containing 109B [Source:HGNC Symbol;Acc:26076]	4	protein_coding	1.78408	5.12838	2.57174	1.87629	2.66442	3.66051	3.43093	2.8139	3.18845	3.89415	4.32246	4.11966	2.83011	1.07897	1.83525	2.46838	1.87928	2.9582	2.2443	2.52402	4.10684	4.11884	4.03267	3.15655	4.0748	3.23086	3.20425	4.00361	3.24726	2.61693	4.76592	3.16369	3.88537	3.56858	3.91541	2.99043	3.11732	2.34816	4.02127	3.56858
ENSG00000005073	HOXA11	homeobox A11 [Source:HGNC Symbol;Acc:5101]	7	protein_coding	-0.253763	-0.845428	4.77999	3.73537	1.34933	-1.26548	1.43403	-0.417279	-1.03207	2.15987	0.196678	3.22328	1.76699	3.14816	-2.27426	-1.21555	-2.1243	-1.97756	-2.41223	-2.18871	-1.26548	-0.825923	-0.387962	0.0587703	-0.182274	3.46439	-0.880802	-2.58747	-0.639129	3.34804	0.338163	-0.0329971	-2.14308	-1.10833	2.76278	-1.87909	2.2218	2.32608	-0.841594	2.35029
ENSG00000005075	POLR2J	polymerase (RNA) II (DNA directed) polypeptide J, 13.3kDa [Source:HGNC Symbol;Acc:9197]	7	protein_coding	3.50196	4.16967	3.93212	3.5245	3.73414	3.65587	4.12724	2.89622	3.61723	3.9224	2.86766	3.18033	3.24173	3.5254	2.98929	2.86193	3.63296	1.98499	2.45013	2.54809	4.51467	4.32589	4.22734	3.01519	4.52876	3.34896	4.10998	3.08463	3.86779	4.49285	3.86374	4.15638	3.88581	3.52102	4.69184	4.36275	4.34898	3.53034	3.62226	4.26868
ENSG00000005100	DHX33	DEAH (Asp-Glu-Ala-His) box polypeptide 33 [Source:HGNC Symbol;Acc:16718]	17	protein_coding	5.04749	5.22014	5.98612	5.75717	5.47077	4.97501	4.81946	5.94967	5.06875	4.61538	5.17634	5.16885	4.94232	5.48207	5.18744	5.15226	5.11087	4.52222	5.18223	5.35012	6.17489	5.50768	5.65327	5.06754	5.19565	4.95296	5.63642	4.687	5.89619	4.64655	5.2937	5.61926	4.98262	4.39393	5.33328	5.97454	4.8823	5.2267	4.74832	4.82517
ENSG00000005102	MEOX1	mesenchyme homeobox 1 [Source:HGNC Symbol;Acc:7013]	17	protein_coding	-2.31647	-0.0938486	2.35537	0.215668	2.4618	0.222135	-1.36261	2.04929	2.89622	-0.275812	1.64696	1.82285	5.50637	3.05108	4.01028	3.83595	2.70619	4.84043	4.09264	4.03302	-0.614781	-2.1243	1.79886	3.20974	2.36082	-0.482561	3.47979	3.26014	-0.499282	2.53736	-0.302019	2.20161	3.54268	1.6648	-3.1306	1.97066	-1.04096	-0.427085	1.08343	-0.579246
ENSG00000005108	THSD7A	thrombospondin, type I, domain containing 7A [Source:HGNC Symbol;Acc:22207]	7	protein_coding	4.37048	2.59536	4.30251	5.02947	3.93495	3.85565	2.4197	4.39091	2.99378	3.22874	3.96816	4.35536	5.16402	3.98967	4.34156	3.91505	3.75797	5.05531	3.72866	4.99543	4.98262	2.43413	3.46259	4.36548	5.17865	3.09206	3.27882	4.13725	2.6074	3.88581	3.74315	2.88063	5.16563	5.10486	2.28975	4.75115	4.32149	4.5206	3.78517	4.58086
ENSG00000005156	LIG3	ligase III, DNA, ATP-dependent [Source:HGNC Symbol;Acc:6600]	17	protein_coding	5.07636	5.41093	5.70694	5.16696	5.9548	5.51465	5.88486	6.09018	5.44334	5.11018	5.96329	5.75816	4.74768	5.73856	5.87633	5.60227	5.722	5.14356	5.51938	5.31773	5.93352	6.34686	6.35783	5.48273	5.22924	5.58637	5.35737	5.34001	6.33345	5.47351	6.91624	6.20996	5.66312	5.29054	5.23569	5.73179	5.78778	6.18776	5.26148	5.12328
ENSG00000005175	RPAP3	RNA polymerase II associated protein 3 [Source:HGNC Symbol;Acc:26151]	12	protein_coding	3.91764	4.28709	4.38487	4.32445	5.02643	4.3365	4.74448	3.76088	4.63025	4.48892	3.94147	3.50447	3.77886	4.23177	3.9038	4.05691	4.17417	4.0748	4.18654	3.71456	4.20407	4.31274	4.09192	4.40171	4.72061	4.67097	3.9038	4.34567	4.95772	4.26538	4.73712	4.57884	4.59953	4.40607	4.47718	3.99413	4.55323	4.84779	4.72589	4.447
ENSG00000005187	ACSM3	acyl-CoA synthetase medium-chain family member 3 [Source:HGNC Symbol;Acc:10522]	16	protein_coding	4.57786	0.246973	-0.780004	-0.00236655	1.32625	1.82674	1.05744	0.589222	1.9265	-0.745432	0.189468	-1.08714	0.495768	1.60179	1.44249	1.61958	3.16321	-0.179249	3.77799	1.66685	2.61955	-0.205617	3.04729	0.932452	1.3589	-0.176525	2.15548	1.04749	1.77263	1.1351	-0.537915	1.69831	0.0193518	1.05905	-2.10589	-0.946012	0.911482	-1.72575	0.508917	-0.817866
ENSG00000005189	AC004381.6	Putative RNA exonuclease NEF-sp [Source:UniProtKB/Swiss-Prot;Acc:Q96IC2]	16	protein_coding	4.18576	1.56651	2.14859	1.82463	2.4964	3.14231	2.06969	2.16751	2.53253	1.8605	2.41479	2.67955	2.68997	1.41466	-0.0677587	1.08646	3.04119	1.44704	1.22037	1.84893	3.27268	2.31047	3.22975	2.07212	2.33324	2.66194	2.41479	0.897336	2.30637	3.47472	3.29283	2.72888	1.05033	2.54419	3.48924	3.34614	1.20961	2.40285	1.29877	1.94974
ENSG00000005194	CIAPIN1	cytokine induced apoptosis inhibitor 1 [Source:HGNC Symbol;Acc:28050]	16	protein_coding	4.31957	5.59685	4.89779	4.84809	5.59264	5.9446	5.26584	5.37709	5.29085	5.86115	4.54403	5.16339	4.75597	4.1872	4.19103	4.65812	4.73804	4.59507	4.70461	4.45357	5.5878	5.01047	5.71021	4.93561	5.8207	5.58248	4.81788	4.46986	4.62311	5.31863	4.77331	5.28475	4.98359	5.35901	5.37611	4.57686	4.88415	4.98232	5.00984	4.94509
ENSG00000005206	SPPL2B	signal peptide peptidase like 2B [Source:HGNC Symbol;Acc:30627]	19	processed_transcript	5.88042	5.18256	4.7008	5.67753	4.80292	4.94541	5.33569	5.36695	4.73866	4.77523	5.63906	4.94509	5.35476	4.7168	5.2786	5.30105	5.32705	5.17503	5.23638	5.53819	4.78414	4.44109	5.82528	4.95984	4.82357	4.79757	4.17799	5.60677	4.99297	4.46632	4.31337	4.94397	5.31578	5.74584	5.82599	5.79862	4.1286	5.24292	5.06273	4.32413
ENSG00000005238	FAM214B	family with sequence similarity 214, member B [Source:HGNC Symbol;Acc:25666]	9	protein_coding	4.69404	4.41736	4.14299	5.45298	4.56652	4.95654	3.97	4.47518	3.9878	5.30198	3.48882	3.56032	4.81195	3.7172	3.86669	3.17169	3.44438	3.75153	3.93138	3.53713	3.83713	3.09054	3.35916	4.45324	4.1788	4.68158	5.6707	4.06284	4.27445	3.92575	3.83871	4.78922	3.42509	4.61956	4.67328	4.69784	5.36993	5.81712	5.05376	5.29241
ENSG00000005243	COPZ2	coatomer protein complex, subunit zeta 2 [Source:HGNC Symbol;Acc:19356]	17	protein_coding	1.50566	3.07831	1.69737	3.22478	3.95363	2.11196	3.02481	3.31101	1.42603	3.53856	2.32286	2.12854	4.96526	2.51422	1.74516	2.40213	1.22173	2.48972	2.29404	2.93984	1.24971	1.60677	1.39775	2.4871	2.96223	4.17925	2.53395	3.02549	1.1351	2.39018	1.74605	2.99215	2.00974	2.54293	2.2254	2.1216	3.52811	2.01153	1.91785	4.91887
ENSG00000005249	PRKAR2B	protein kinase, cAMP-dependent, regulatory, type II, beta [Source:HGNC Symbol;Acc:9392]	7	protein_coding	2.519	4.25955	4.37542	2.21713	1.49251	4.18544	4.33953	5.04909	3.81712	5.15668	3.15388	4.56588	8.14805	4.09694	3.47692	4.2727	4.28065	4.52582	4.94917	6.1718	3.57459	3.34413	5.02516	3.69406	5.62912	2.03496	4.71969	4.27755	4.38005	6.65174	3.8248	4.70749	4.37279	4.52746	2.75388	4.31726	5.50768	2.21787	2.68423	2.52866
ENSG00000005302	MSL3	male-specific lethal 3 homolog (Drosophila) [Source:HGNC Symbol;Acc:7370]	X	protein_coding	4.8593	5.24133	5.24517	4.95112	4.76815	5.17503	4.94693	5.17999	5.3254	4.87759	5.36762	5.17602	4.30765	4.4031	4.4148	4.75432	4.26433	5.03969	4.85417	4.82731	4.61796	5.158	5.26551	5.19789	4.82997	5.58814	5.6992	5.8292	4.77425	5.37516	4.34795	5.06629	6.23923	6.02466	5.00383	5.48677	5.00065	5.13805	5.79318	5.0481
ENSG00000005339	CREBBP	CREB binding protein [Source:HGNC Symbol;Acc:2348]	16	protein_coding	7.35304	6.35783	7.49168	7.57981	7.20098	7.06382	6.58987	7.02123	7.07378	6.67377	6.82796	6.23445	6.66219	7.6759	7.55677	7.57851	7.19167	7.35707	7.29159	7.20016	7.08315	7.16574	7.85153	7.27921	6.97132	6.98787	6.60435	8.03979	7.30936	7.39025	6.80525	7.63865	7.44057	7.34352	5.99383	7.32358	7.0745	7.41191	7.11539	6.55171
ENSG00000005379	BZRAP1	benzodiazepine receptor (peripheral) associated protein 1 [Source:HGNC Symbol;Acc:16831]	17	protein_coding	3.69928	3.76088	3.71622	3.19698	4.36611	2.37864	4.29345	5.86222	4.6199	2.44369	4.25012	3.03966	3.80001	5.49256	5.90447	5.22212	5.14193	5.01431	5.32506	5.05563	4.27616	4.08366	5.06107	4.0402	3.1622	3.38245	1.28296	4.20443	4.19383	2.97122	5.51971	2.6336	4.62022	4.37247	4.31827	4.26868	4.24202	4.85294	3.57501	4.04603
ENSG00000005436	GCFC2	GC-rich sequence DNA-binding factor 2 [Source:HGNC Symbol;Acc:1317]	2	protein_coding	5.09039	4.96886	4.17696	4.08768	4.67097	3.16321	4.4873	4.21863	3.9578	4.05656	3.99114	4.43662	4.42794	4.13687	3.69804	3.40012	4.24756	3.4698	4.01862	4.1745	5.014	4.45969	4.13193	3.86628	4.1135	4.40055	3.55081	3.56712	4.93439	4.23862	4.87952	4.07824	4.2314	3.92763	5.01953	4.03231	3.98234	4.24132	3.6481	4.27337
ENSG00000005448	WDR54	WD repeat domain 54 [Source:HGNC Symbol;Acc:25770]	2	protein_coding	3.05057	4.70271	1.62385	3.88811	3.68149	3.5299	3.6104	2.92761	3.42884	3.35473	2.89445	2.33103	3.1602	2.61509	3.43044	3.10857	3.72338	3.108	3.40738	3.18496	4.16393	4.56683	3.82261	2.58197	3.40692	4.17247	3.6819	3.31101	5.27955	2.67468	3.48832	4.63709	4.00138	2.50457	6.37751	2.20009	4.42339	4.02357	3.66832	4.64205
ENSG00000005469	CROT	carnitine O-octanoyltransferase [Source:HGNC Symbol;Acc:2366]	7	protein_coding	1.32254	3.36914	3.69757	3.00817	3.9878	3.20425	4.13939	3.25198	2.81577	5.95739	2.95551	2.96691	3.57978	4.04849	4.18235	4.34898	4.92226	3.6811	4.88354	3.77799	3.2994	1.95751	1.47807	5.47351	3.46208	4.35598	3.05982	3.5123	3.14492	7.33791	3.13279	1.72897	3.37947	4.72358	3.26827	4.13575	6.09018	3.06452	2.89161	3.73827
ENSG00000005471	ABCB4	ATP-binding cassette, sub-family B (MDR/TAP), member 4 [Source:HGNC Symbol;Acc:45]	7	protein_coding	-0.0677587	-0.312066	-1.72575	3.72416	1.52218	-0.474573	-0.275812	-0.435182	-0.479349	0.706031	0.670445	-0.408006	1.21912	-2.54821	-1.03666	-1.61912	-1.45651	0.128887	-0.61833	-0.955486	0.198828	0.255997	-0.387962	-1.18575	0.287995	1.47468	-0.151001	1.94361	-1.43296	-0.741869	0.144279	-0.0360167	0.94359	-0.0754539	-1.159	-0.655136	1.08801	1.09356	0.508917	1.73792
ENSG00000005483	KMT2E	lysine (K)-specific methyltransferase 2E [Source:HGNC Symbol;Acc:18541]	7	protein_coding	5.81463	5.90226	5.94675	6.36654	6.76304	5.64207	5.97974	6.47336	6.27437	6.37839	6.44175	6.70864	6.1568	6.93795	6.94606	6.84253	6.5287	6.91193	6.8527	6.55428	6.17257	6.72677	6.46568	6.5778	6.65765	5.55375	6.19462	7.10337	6.13513	6.70356	6.27822	6.56264	7.03195	6.60021	5.48141	5.58439	6.93439	6.13001	6.66329	6.09585
ENSG00000005486	RHBDD2	rhomboid domain containing 2 [Source:HGNC Symbol;Acc:23082]	7	protein_coding	5.97082	6.31751	5.4943	3.61411	5.98088	6.33981	5.81039	5.21253	5.61093	7.38189	5.44832	5.23809	5.40569	5.35346	5.12189	5.23116	5.8217	4.84682	5.80243	5.18941	6.09245	5.9002	4.5889	5.18878	5.92726	6.35928	6.00383	4.87348	5.7404	6.41371	5.13673	5.82671	5.36125	5.13158	6.02785	4.97979	5.69842	4.39485	5.12125	5.98417
ENSG00000005513	SOX8	SRY (sex determining region Y)-box 8 [Source:HGNC Symbol;Acc:11203]	16	protein_coding	6.86457	1.78853	3.0984	6.79842	3.68456	0.268153	-2.11428	3.07162	-0.110493	2.00048	4.67064	2.56235	2.72326	2.83011	3.27483	3.51878	3.1226	2.8878	2.51225	3.80231	1.58179	1.72989	7.07045	0.741148	5.30105	3.18642	-0.435182	3.30814	7.21827	0.550733	1.49118	7.3339	2.1216	1.44814	1.40714	3.12964	-1.24157	0.317081	5.40569	0.484412
ENSG00000005700	IBTK	inhibitor of Bruton agammaglobulinemia tyrosine kinase [Source:HGNC Symbol;Acc:17853]	6	protein_coding	5.92043	5.55474	5.66624	5.86401	5.94714	6.04292	6.21951	6.06148	5.75682	6.33005	5.87633	5.2192	5.9548	6.06148	5.95082	5.8292	6.34686	5.93241	6.14522	5.84141	5.70559	5.01918	5.8046	5.37969	5.36304	6.45477	5.84421	5.72828	5.80211	5.64885	5.57803	6.17985	5.97495	5.64572	6.53107	5.68136	6.23881	6.38499	5.67	6.15961
ENSG00000005801	ZNF195	zinc finger protein 195 [Source:HGNC Symbol;Acc:12986]	11	protein_coding	4.27922	4.20275	4.6504	6.23239	3.93838	3.9477	4.53038	4.07547	4.26932	4.27541	3.46259	4.07268	3.58953	4.31473	4.62473	4.06441	4.09013	4.38309	4.06832	4.2817	4.50158	4.56555	3.52855	3.93803	4.39851	4.02089	4.16328	4.71518	4.16142	4.66934	4.12823	4.80072	4.64786	4.40984	4.30185	4.58023	4.60342	4.62182	5.02114	3.98852
ENSG00000005810	MYCBP2	MYC binding protein 2, E3 ubiquitin protein ligase [Source:HGNC Symbol;Acc:23386]	13	protein_coding	6.70754	7.29541	7.6759	7.02907	7.52818	9.10081	8.83916	7.79854	8.42733	8.03979	8.8432	8.64809	8.16442	7.6453	7.95103	8.10704	7.64797	8.47522	8.04189	8.06103	8.22983	7.86924	7.49663	8.02516	6.91068	7.99448	7.05317	8.67987	6.42212	8.87592	7.85857	7.87821	8.90099	7.91491	7.46843	8.07833	6.85338	7.28764	8.85946	7.03587
ENSG00000005812	FBXL3	F-box and leucine-rich repeat protein 3 [Source:HGNC Symbol;Acc:13599]	13	protein_coding	4.75975	5.22144	5.47678	4.71618	5.88486	5.10059	6.2892	5.93388	5.52005	5.82886	6.38207	6.14793	6.7138	6.35247	6.51655	6.52919	6.58047	6.52488	6.6363	6.64939	4.91788	5.63197	5.21253	5.84912	4.90099	6.43711	4.71808	6.10013	4.42074	6.46415	4.71039	5.30964	6.06073	5.21058	5.80863	5.50157	4.92136	4.61956	5.58216	4.87097
ENSG00000005844	ITGAL	integrin, alpha L (antigen CD11A (p180), lymphocyte function-associated antigen 1; alpha polypeptide) [Source:HGNC Symbol;Acc:6148]	16	protein_coding	4.06099	4.06798	3.46755	3.31736	4.45602	6.02073	5.14796	5.5163	6.0799	4.47206	6.37179	5.03647	3.6033	3.09571	4.74316	5.19361	4.04458	6.50001	4.72031	4.25823	3.21469	5.04719	3.18448	5.68066	4.47718	3.2626	3.09791	6.77152	3.51828	4.4957	4.73395	4.72133	7.10012	5.16433	1.28047	3.71848	3.32862	1.93059	7.53813	4.78922
ENSG00000005882	PDK2	pyruvate dehydrogenase kinase, isozyme 2 [Source:HGNC Symbol;Acc:8810]	17	protein_coding	2.23762	3.28755	4.22868	3.1216	4.26094	4.40917	3.22729	4.22697	3.74108	3.45416	4.63593	4.48036	6.34686	5.29021	4.92319	5.25469	5.34855	5.08719	5.24422	5.05313	4.41413	4.6739	3.32965	4.27648	3.5232	4.17034	3.40121	4.35103	4.65684	4.87571	3.84041	4.73613	4.3042	3.72539	4.20829	4.43443	3.28593	3.94883	4.79694	4.56652
ENSG00000005884	ITGA3	integrin, alpha 3 (antigen CD49C, alpha 3 subunit of VLA-3 receptor) [Source:HGNC Symbol;Acc:6139]	17	protein_coding	3.1835	3.34896	6.21951	4.35136	6.13964	6.03861	5.78054	6.6281	5.31609	7.12456	4.20241	4.11279	5.95663	7.24642	7.70644	7.24276	7.19267	6.99018	7.08893	6.72397	3.84987	7.08634	5.91311	5.97228	6.58371	6.01615	4.89711	6.68248	8.18821	5.54771	4.47903	4.74768	6.91394	5.7618	6.1761	6.29489	5.23842	6.99179	6.30231	5.49219
ENSG00000005889	ZFX	zinc finger protein, X-linked [Source:HGNC Symbol;Acc:12869]	X	protein_coding	5.77171	6.28275	6.38543	6.93439	5.98914	6.258	5.876	6.27691	6.04967	6.10356	6.16667	6.17337	6.52537	6.86913	6.76604	6.88431	6.79356	6.67642	6.8192	6.84388	5.2692	6.48959	6.50824	6.45522	5.36962	6.11647	5.77491	6.44081	5.45107	6.08378	5.16466	6.45199	6.42212	6.48017	5.73522	6.05717	5.60258	6.62314	6.16365	6.19941
ENSG00000005893	LAMP2	lysosomal-associated membrane protein 2 [Source:HGNC Symbol;Acc:6501]	X	protein_coding	8.71978	8.22396	8.92655	7.49911	7.08161	8.13651	7.66108	7.79521	7.54919	7.88182	7.35496	7.20987	6.86144	8.61027	7.86034	7.26075	7.34205	7.13026	7.39472	7.05997	6.21499	8.2199	8.0827	7.36917	7.73099	7.36224	7.63588	7.50164	7.16913	7.48539	7.41498	7.30156	7.43952	7.48297	8.01278	8.52184	8.51868	7.04395	7.89639	7.94524
ENSG00000005955	GGNBP2	gametogenetin binding protein 2 [Source:HGNC Symbol;Acc:19357]	17	protein_coding	5.01656	5.12775	5.14446	5.1297	5.5951	5.31091	5.82706	5.99855	5.66409	5.45967	6.02942	6.09512	5.92265	5.54055	6.01615	5.74998	5.84034	5.95002	5.86694	5.98531	5.32833	5.6721	5.94933	5.77949	5.03844	5.64675	5.14509	5.99239	5.63477	5.51737	5.9453	5.71236	5.94146	5.63509	5.45072	5.17307	5.26148	5.87702	5.78312	5.59905
ENSG00000005961	ITGA2B	integrin, alpha 2b (platelet glycoprotein IIb of IIb/IIIa complex, antigen CD41) [Source:HGNC Symbol;Acc:6138]	17	protein_coding	-0.655136	-1.51433	-0.89958	0.616956	-0.528269	0.303584	-1.49657	-1.73221	1.28296	-4.24608	1.82902	-0.458116	0.96793	0.354282	-1.60731	-0.658779	-0.89958	-0.101669	-2.69094	0.0889864	1.11863	1.29336	1.29753	-0.159419	-0.444698	0.73781	1.10882	-0.447737	3.29283	-2.6652	1.07321	1.67562	-1.67862	-0.131824	1.37581	0.133565	0.347137	2.36008	-1.08219	0.828016
ENSG00000006007	GDE1	glycerophosphodiester phosphodiesterase 1 [Source:HGNC Symbol;Acc:29644]	16	protein_coding	6.39779	6.89946	6.35378	5.78453	6.56313	6.47291	6.8578	5.70591	5.81353	7.09764	5.78165	5.30646	6.60738	6.113	5.93388	6.09933	6.71496	5.90091	6.13191	5.79063	5.34855	5.38999	6.17816	6.14083	6.38671	5.99383	6.60285	5.80566	5.6896	6.58248	5.44367	6.53915	5.64439	6.20954	6.24126	5.61858	6.11573	4.67836	6.48379	5.57771
ENSG00000006015	C19orf60	chromosome 19 open reading frame 60 [Source:HGNC Symbol;Acc:26098]	19	protein_coding	5.48344	5.79063	5.13221	6.08756	5.35996	5.12937	5.36059	5.71479	5.55342	5.50157	5.8046	5.90412	5.6361	5.39382	5.44175	5.34201	5.12937	5.68642	5.6206	5.37024	5.44863	4.9747	5.75033	5.6974	5.7134	5.41477	5.04688	5.9787	5.07669	5.46333	6.9073	4.81883	5.85617	5.9002	4.62992	5.23535	5.25538	3.91121	6.03089	5.31609
ENSG00000006016	CRLF1	cytokine receptor-like factor 1 [Source:HGNC Symbol;Acc:2364]	19	protein_coding	0.529137	0.510901	3.549	2.89222	-0.951152	-1.59269	0.208555	2.60529	5.18389	2.09485	3.59136	3.94883	3.22077	2.90635	-0.275812	1.73792	2.32006	-0.61151	0.32962	2.45309	-1.43296	-0.148045	5.8615	1.7482	0.315056	3.67603	-0.0528097	-0.903453	1.51895	-0.696245	3.36449	1.30002	0.0166287	-1.19502	2.29404	-0.908375	1.50462	1.99454	-0.58586	5.03581
ENSG00000006025	OSBPL7	oxysterol binding protein-like 7 [Source:HGNC Symbol;Acc:16387]	17	protein_coding	2.92526	2.75203	2.64738	3.14543	3.52811	2.61374	3.42602	3.04835	3.22779	2.5059	3.00656	3.49651	3.64437	3.40963	3.86743	3.89886	3.50011	3.9758	3.90033	3.34263	1.87266	3.90854	3.56221	3.71456	2.81042	2.49295	2.62023	3.99264	4.30349	3.20172	3.57049	1.94717	3.98416	3.43044	2.4793	3.10421	3.36586	2.69291	4.05691	4.2817
ENSG00000006042	TMEM98	transmembrane protein 98 [Source:HGNC Symbol;Acc:24529]	17	protein_coding	1.56872	3.23438	5.18581	5.10958	5.13805	2.53315	3.99183	5.79394	4.64301	4.30453	4.42601	6.08595	4.8648	5.69955	6.00688	6.04246	5.76146	5.22442	5.75992	5.50494	4.60049	6.07528	6.522	4.37341	5.93855	5.36727	5.02297	5.56607	6.01885	3.56305	4.70975	3.04119	4.34661	4.01792	4.982	4.33984	4.68793	5.52439	2.58469	4.93804
ENSG00000006047	YBX2	Y box binding protein 2 [Source:HGNC Symbol;Acc:17948]	17	protein_coding	5.40995	-0.628265	2.85347	0.454092	1.33234	1.97733	2.92526	0.730295	1.82784	3.6819	3.59041	3.73667	3.31975	2.37493	1.23405	1.96172	2.19415	1.24852	2.13087	0.872482	1.28551	-1.08714	1.62165	3.87785	0.784881	4.8683	1.88902	0.620442	1.9995	4.96824	3.59968	4.447	-0.110493	4.79314	4.5036	3.62006	4.62119	1.64696	1.57971	0.875803
ENSG00000006062	MAP3K14	mitogen-activated protein kinase kinase kinase 14 [Source:HGNC Symbol;Acc:6853]	17	processed_transcript	3.62569	3.73192	3.99342	3.98156	4.79443	4.70394	4.20208	4.96853	4.53443	3.89494	4.79347	4.04815	4.44863	4.7771	5.38223	4.51302	4.47415	5.22277	5.49896	5.27683	4.89479	5.70878	3.71337	4.88702	3.91879	3.74439	3.18845	5.2708	6.24961	3.97468	4.53237	3.78166	5.46835	4.75023	3.50667	5.21253	3.94646	4.29345	5.35571	4.28779
ENSG00000006071	ABCC8	ATP-binding cassette, sub-family C (CFTR/MRP), member 8 [Source:HGNC Symbol;Acc:59]	11	protein_coding	-4.57153	-3.09226	-0.683566	-0.858207	-4.983	-2.56157	-1.29262	-2.31647	-3.20724	-1.71931	-5.26717	-2.58747	0.466352	1.78588	-0.521797	3.30231	3.22028	0.0117867	0.752755	-0.414041	-2.4565	-2.94816	-5.69213	1.6678	-5.26717	-0.137026	-5.45477	-0.29919	-1.83147	2.43057	-4.983	-2.10589	-0.849566	-0.45177	0.233375	-3.26867	-0.364664	2.97639	-2.30649	-1.39086
ENSG00000006074	CCL18	chemokine (C-C motif) ligand 18 (pulmonary and activation-regulated) [Source:HGNC Symbol;Acc:10616]	17	protein_coding	4.1361	2.79176	0.730295	-0.813885	2.9916	6.1043	5.48477	1.42603	6.23199	1.51348	1.67862	3.98563	1.79165	-1.68588	-2.43451	2.02454	-1.70624	4.68472	-0.32394	1.03788	0.860428	4.20862	2.39698	6.29056	5.57245	-0.355571	3.02979	3.3846	0.917994	0.975338	4.37542	3.72704	4.31473	-0.813885	1.61026	0.828016	2.06969	-0.603935	5.59193	2.44589
ENSG00000006075	CCL3	chemokine (C-C motif) ligand 3 [Source:HGNC Symbol;Acc:10627]	17	protein_coding	3.9224	4.77936	2.42639	3.9878	5.42252	5.05951	3.4596	3.24222	4.48826	4.11493	3.33645	3.80938	5.16563	2.27013	5.99782	5.23913	2.75561	6.16244	4.73267	4.06513	2.12083	4.71103	3.48472	4.46565	4.53952	3.43093	3.30231	2.48581	2.04849	4.06477	4.40736	4.21758	3.07451	2.9136	2.11282	2.48774	2.61059	2.78336	6.20182	4.06441
ENSG00000006114	SYNRG	synergin, gamma [Source:HGNC Symbol;Acc:557]	17	protein_coding	5.42623	4.40704	5.46442	5.41637	6.258	6.0127	5.88741	6.42392	6.11854	5.1513	6.27522	5.91608	5.79218	5.99744	6.33215	6.35247	5.99239	6.64939	6.31271	6.12245	4.8713	6.31135	6.0401	6.22365	6.197	5.29433	4.90383	6.77213	6.07836	5.82566	5.56295	6.27782	6.86577	5.87357	5.65252	5.89021	5.01918	5.80178	6.8174	5.77628
ENSG00000006118	TMEM132A	transmembrane protein 132A [Source:HGNC Symbol;Acc:31092]	11	protein_coding	8.07181	7.92395	7.33089	6.2735	6.81976	6.99787	7.74193	6.94883	7.52017	8.00258	7.9588	6.00456	4.24097	6.73209	5.56295	5.47747	5.24259	5.31548	5.49733	4.49475	7.4818	5.72062	8.28079	5.46869	7.66241	5.75033	9.41478	6.81393	7.48821	6.37135	7.32664	7.3733	5.95849	5.59977	6.61051	8.02724	7.72789	3.78357	6.06982	6.99711
ENSG00000006125	AP2B1	adaptor-related protein complex 2, beta 1 subunit [Source:HGNC Symbol;Acc:563]	17	protein_coding	6.39467	7.71707	8.00869	7.06794	7.93567	6.32792	8.05675	8.09591	7.39369	7.49911	8.56366	8.24237	7.25412	8.05675	7.77388	7.93186	8.83916	7.76097	7.53443	7.58353	7.96466	8.45105	8.52501	7.62929	6.58298	7.26166	7.56548	7.5823	7.71864	7.03949	9.02928	8.06533	7.65358	7.12171	7.8324	7.61688	7.94717	7.20369	7.26671	7.40532
ENSG00000006194	ZNF263	zinc finger protein 263 [Source:HGNC Symbol;Acc:13056]	16	protein_coding	5.13705	4.95175	5.54803	5.34917	5.05243	5.22828	4.60988	5.28277	4.98587	5.04222	5.09262	4.67487	5.15602	5.70404	5.38802	5.41576	5.67787	5.22409	5.56673	5.3774	5.39957	5.07274	5.52636	5.38903	4.45127	4.94917	4.45531	5.32639	5.00225	5.45766	4.74129	5.48207	5.07701	5.331	5.52777	5.26791	5.28805	5.17371	4.81788	4.74287
ENSG00000006210	CX3CL1	chemokine (C-X3-C motif) ligand 1 [Source:HGNC Symbol;Acc:10647]	16	protein_coding	3.75516	8.27458	7.41191	3.13076	7.53813	5.22924	4.57587	8.17863	7.127	7.11297	6.40555	7.3339	7.41292	8.59343	10.3049	9.11559	8.14573	9.41478	9.08136	9.46566	5.04657	5.57872	7.26075	5.87809	6.04725	4.74346	7.56284	7.18566	5.70951	5.16696	5.11448	6.65602	7.29632	8.76473	2.53736	5.78093	6.19583	5.68785	6.43395	3.63729
ENSG00000006282	SPATA20	spermatogenesis associated 20 [Source:HGNC Symbol;Acc:26125]	17	protein_coding	5.05049	3.73749	4.41607	5.62163	5.11148	4.65747	5.31709	5.64505	4.82517	5.28883	4.54531	5.20315	6.09933	5.75957	6.30451	6.13314	6.23803	5.90983	5.60124	5.55636	3.63076	3.22779	4.56906	5.39709	5.22828	5.59028	4.20587	5.46705	5.25729	4.82201	4.37718	5.06722	5.83243	4.90629	4.32413	6.22318	4.74253	5.57245	5.29401	4.4526
ENSG00000006283	CACNA1G	calcium channel, voltage-dependent, T type, alpha 1G subunit [Source:HGNC Symbol;Acc:1394]	17	protein_coding	-1.95162	-2.04984	1.49118	2.85119	0.296643	-0.371129	-1.35712	0.161083	-2.70614	0.323338	-1.04957	-0.179249	1.11022	1.19082	1.61123	3.85447	2.6917	1.14718	2.80852	1.53707	-1.3686	-1.84676	-0.941601	0.148841	-2.0897	-1.86361	-2.62393	-0.737393	2.09397	-0.308454	-2.537	-1.66391	2.3517	0.801538	-0.908375	-1.90926	-1.27667	3.75008	-1.03207	3.40504
ENSG00000006327	TNFRSF12A	tumor necrosis factor receptor superfamily, member 12A [Source:HGNC Symbol;Acc:18152]	16	protein_coding	6.21821	6.96608	6.69573	6.68197	6.61207	6.9028	5.41668	6.49011	6.27059	7.1563	6.32131	5.45766	4.93114	5.8207	7.35597	5.32218	6.56423	5.23471	6.73843	7.24457	6.14598	6.32	6.68083	5.88919	6.8121	7.39257	6.77152	5.702	7.62795	4.91034	6.12171	6.39154	6.11054	6.27266	4.26803	6.07491	7.34987	5.73136	5.54944	7.21997
ENSG00000006432	MAP3K9	mitogen-activated protein kinase kinase kinase 9 [Source:HGNC Symbol;Acc:6861]	14	protein_coding	5.69298	4.8348	4.75432	2.08733	4.199	5.14062	4.03628	4.23963	5.14541	5.49526	4.30698	4.42921	1.28412	4.2667	4.6456	4.31337	4.37016	3.04835	4.05116	3.74716	4.9374	4.30833	3.70118	4.19383	3.97387	5.26712	5.2498	3.86015	4.57464	4.69915	4.2962	4.88895	4.11569	4.71072	4.93976	5.40154	4.39091	4.5782	3.74439	4.67097
ENSG00000006451	RALA	v-ral simian leukemia viral oncogene homolog A (ras related) [Source:HGNC Symbol;Acc:9839]	7	protein_coding	4.72358	5.18515	5.08312	4.50744	5.41093	5.15025	5.70837	4.81756	4.77234	6.04533	5.12387	5.46333	5.09609	4.99416	4.48826	4.63854	4.49475	4.53851	4.23927	4.49285	5.94749	5.45934	5.71203	4.20899	4.40203	5.31741	4.92257	4.36811	5.49896	4.92011	5.29567	5.01523	4.36777	5.03969	5.44832	4.27922	5.12937	4.31827	4.71293	5.50391
ENSG00000006453	BAIAP2L1	BAI1-associated protein 2-like 1 [Source:HGNC Symbol;Acc:21649]	7	protein_coding	5.782	5.32126	4.99267	2.09572	5.50126	5.2289	5.13837	4.34831	5.3874	6.53513	4.40506	5.62676	3.21422	4.43019	3.94445	3.28045	3.9689	3.46537	3.91541	3.56442	5.75783	5.76943	5.57739	3.90737	5.2135	6.07138	4.88197	3.56905	5.32932	5.27955	5.46206	4.93945	3.96389	5.17668	5.55011	5.12328	5.34979	4.6928	3.86858	4.86251
ENSG00000006459	KDM7A	lysine (K)-specific demethylase 7A [Source:HGNC Symbol;Acc:22224]	7	protein_coding	4.72656	5.8495	5.93458	5.12805	5.49557	5.06468	6.27266	5.72278	5.88703	6.47426	5.55843	6.26545	5.60258	5.79932	5.45869	5.66206	5.24422	6.32737	5.68572	5.60776	5.30326	5.9526	4.95144	6.1284	5.62467	6.1063	5.54088	6.2735	5.25855	6.47778	6.2714	5.3023	6.00081	6.13154	7.38088	4.60858	5.73255	5.36632	5.48779	5.37316
ENSG00000006468	ETV1	ets variant 1 [Source:HGNC Symbol;Acc:3490]	7	protein_coding	5.92509	2.53055	3.42457	3.34849	4.53509	2.96572	4.35473	2.67657	2.52801	4.20407	3.32596	2.80795	3.23857	4.49348	4.07373	4.46397	3.95055	3.73148	3.73827	3.78047	1.11716	1.96963	2.64991	3.89335	4.24515	4.1574	3.74108	3.63553	3.25646	2.62089	1.9559	3.21469	3.03364	3.58635	4.27821	2.51422	3.51361	3.38687	2.85119	0.513514
ENSG00000006530	AGK	acylglycerol kinase [Source:HGNC Symbol;Acc:21869]	7	protein_coding	3.74676	4.4643	4.77017	4.29345	4.33884	4.0779	4.52976	4.14991	4.14192	4.77456	4.38455	4.62568	3.87433	4.26868	3.69845	3.53164	3.73537	3.80901	3.79876	3.75272	4.85073	5.05563	2.67034	4.40506	5.40797	3.09154	4.2062	4.04957	4.68825	4.38859	5.26644	4.07866	4.03159	4.78031	4.06904	5.14446	4.15853	4.43118	4.35237	4.37575
ENSG00000006534	ALDH3B1	aldehyde dehydrogenase 3 family, member B1 [Source:HGNC Symbol;Acc:410]	11	protein_coding	1.91956	3.12745	2.10612	2.66629	3.35473	3.15807	2.74892	2.1569	3.90659	3.58997	2.90328	1.90928	2.859	1.65383	2.38144	1.83094	1.97066	2.42915	2.28366	1.82285	1.67961	4.08264	2.12854	2.54171	2.5605	3.3466	2.74037	2.17646	1.11022	1.51476	2.39286	2.96223	2.45778	4.41348	0.987586	1.60179	2.28745	1.69831	3.72986	3.545
ENSG00000006555	TTC22	tetratricopeptide repeat domain 22 [Source:HGNC Symbol;Acc:26067]	1	protein_coding	4.60081	5.90983	5.37157	0.187052	1.60381	4.07008	2.7508	4.14677	4.44468	4.58958	3.79963	4.88259	1.42255	4.9283	4.12006	3.86015	4.07445	3.77671	4.33581	3.7613	5.48942	5.20804	2.91848	3.88887	4.4341	4.96147	4.94298	3.71194	4.31006	4.80942	6.13721	4.26399	4.37542	3.108	2.34964	4.12896	4.53787	4.07445	4.40372	1.96504
ENSG00000006576	PHTF2	putative homeodomain transcription factor 2 [Source:HGNC Symbol;Acc:13411]	7	protein_coding	4.98587	5.61726	5.09965	4.59475	6.11729	5.07035	5.09455	4.85759	4.79879	4.76685	5.3241	4.90781	4.19549	4.36745	3.8755	4.09122	4.20726	4.11136	3.89693	3.89811	4.68093	4.68348	4.32478	4.36042	5.54023	5.80599	5.22763	4.89975	5.06238	4.50128	4.81852	5.45552	4.49223	4.53787	4.55612	4.38309	4.92288	4.9182	4.78383	5.6424
ENSG00000006607	FARP2	FERM, RhoGEF and pleckstrin domain protein 2 [Source:HGNC Symbol;Acc:16460]	2	protein_coding	4.574	5.1933	5.26357	6.891	4.78541	5.366	5.34472	4.94397	5.39674	5.71855	5.48239	5.62467	4.97619	5.2491	5.47678	5.08093	5.49733	4.98516	5.23471	5.34887	6.24126	5.51196	5.13805	5.08312	5.73255	5.38802	5.82002	5.08246	4.82104	4.65169	6.20058	5.33429	5.35669	5.21544	5.35867	4.7419	5.47782	4.87983	5.32347	4.49019
ENSG00000006625	GGCT	gamma-glutamylcyclotransferase [Source:HGNC Symbol;Acc:21705]	7	protein_coding	5.95082	5.71788	4.67422	4.13425	3.90268	5.53217	6.47827	4.92953	3.87476	6.41096	4.74002	4.58989	3.90422	3.97652	3.2737	3.38973	4.31243	2.83417	3.62142	3.5961	5.84034	4.87097	5.75248	5.20315	4.66007	6.46863	5.68031	3.61723	5.91311	6.8723	5.84496	5.63674	4.61956	5.48811	5.06042	4.68762	6.85147	3.83637	4.77047	4.59148
ENSG00000006634	DBF4	DBF4 homolog (S. cerevisiae) [Source:HGNC Symbol;Acc:17364]	7	protein_coding	4.43279	4.48404	4.26165	3.40407	4.44304	4.50392	4.08837	3.4596	4.05618	4.11205	3.87866	4.26367	2.48517	3.00765	3.13694	2.2772	2.73243	2.97066	2.67152	2.31935	5.06365	4.45731	4.69184	3.34211	4.78922	4.58533	4.36611	3.06348	4.65233	4.48925	4.79314	4.23009	3.50151	3.40453	4.09122	5.2289	5.18223	3.85685	4.02588	4.23246
ENSG00000006638	TBXA2R	thromboxane A2 receptor [Source:HGNC Symbol;Acc:11608]	19	protein_coding	1.83801	1.79365	1.93506	1.5417	2.5221	1.25479	1.99026	1.82784	0.317081	1.71947	2.6911	1.58179	2.80263	1.10061	-0.145145	0.712702	0.157904	2.43917	1.91434	1.27135	0.270371	1.27686	1.53604	0.635156	1.23251	1.32254	1.68431	1.05033	1.35645	1.02741	1.58075	1.29081	0.366873	2.02795	2.39353	0.855714	1.5234	2.2218	0.721708	3.91007
ENSG00000006652	IFRD1	interferon-related developmental regulator 1 [Source:HGNC Symbol;Acc:5456]	7	protein_coding	5.2498	6.10903	5.86332	5.2388	6.06036	4.94917	4.95863	5.35901	6.00885	5.81531	5.48677	5.56842	5.15159	5.28442	5.40929	5.06814	4.78217	5.73555	5.08527	5.38061	6.31793	5.33933	4.85169	4.95205	4.69152	5.15831	6.37707	4.61891	5.13837	5.73455	5.84276	4.29937	5.35312	6.02225	4.92674	6.34194	4.22226	5.22442	4.89911	5.6919
ENSG00000006695	COX10	cytochrome c oxidase assembly homolog 10 (yeast) [Source:HGNC Symbol;Acc:2260]	17	protein_coding	3.08356	3.89294	3.26014	3.15605	3.3696	4.02472	3.17774	2.91793	3.07284	3.44161	3.47515	4.14543	3.77217	3.02145	2.80852	3.11787	3.24378	3.05382	3.37534	2.7545	3.65669	4.80418	4.04097	3.64943	3.65372	3.5948	3.58679	2.94326	4.546	3.50667	4.35536	3.97887	3.40918	2.92341	3.77629	3.0942	3.32457	2.93284	3.59266	3.79785
ENSG00000006704	GTF2IRD1	GTF2I repeat domain containing 1 [Source:HGNC Symbol;Acc:4661]	7	protein_coding	4.58153	4.13425	4.87857	4.37879	5.15926	4.53268	4.36275	3.68702	4.08942	5.58539	4.48569	4.30593	3.44481	4.52582	3.62994	3.47647	4.4276	2.79725	3.37856	3.40012	6.07373	5.85579	5.44611	3.99849	4.71233	4.51403	5.12585	3.32272	5.42558	3.95248	5.70694	4.7537	3.07394	3.9201	6.18657	4.52779	4.83912	5.23373	3.11058	5.15602
ENSG00000006712	PAF1	Paf1, RNA polymerase II associated factor, homolog (S. cerevisiae) [Source:HGNC Symbol;Acc:25459]	19	protein_coding	5.8977	5.60641	4.49411	5.31578	4.93877	5.3241	4.9753	4.6739	5.29797	4.89087	4.5711	4.98078	5.11577	5.32741	5.56328	5.13191	5.93069	5.17765	5.33709	5.5288	5.00571	8.07615	6.12133	5.76494	6.16667	5.34274	5.35147	5.76562	5.90983	5.63332	5.13064	5.94821	5.91496	5.54188	6.03125	5.71788	5.88042	5.45766	5.77667	6.14277
ENSG00000006715	VPS41	vacuolar protein sorting 41 homolog (S. cerevisiae) [Source:HGNC Symbol;Acc:12713]	7	protein_coding	5.56116	5.64079	5.84276	5.59977	5.70987	5.91682	6.08717	5.60916	5.31548	5.73655	5.90125	6.22624	5.82002	5.95442	5.4552	5.27141	5.36896	5.50528	5.41261	5.52471	5.80351	5.53617	5.8495	5.17371	5.12	6.03371	5.88451	5.60124	5.95442	5.61993	6.1524	5.88211	5.4637	5.32506	5.29433	4.92257	5.35636	4.97619	5.43271	5.86972
ENSG00000006740	ARHGAP44	Rho GTPase activating protein 44 [Source:HGNC Symbol;Acc:29096]	17	protein_coding	2.05799	3.34706	3.7337	1.59641	2.4078	0.972335	3.23643	1.81182	2.36997	4.24688	2.22711	5.0586	3.05862	3.7828	3.48882	3.10745	2.87897	2.722	3.39546	3.9093	2.42232	3.28351	3.04781	3.77467	1.96963	4.77741	3.76539	1.89256	3.51406	4.32658	4.51995	1.78119	1.94025	4.07409	4.44433	0.192055	1.88092	2.88834	2.41406	2.45575
ENSG00000006744	ELAC2	elaC ribonuclease Z 2 [Source:HGNC Symbol;Acc:14198]	17	protein_coding	5.37253	6.18139	6.21821	5.92966	6.22542	6.34151	6.05913	5.89546	5.93782	6.2308	6.28456	7.12256	6.37135	6.02785	6.02573	6.1051	6.0611	6.19332	6.21781	6.19008	6.02702	6.42492	6.10089	6.39509	5.77984	6.24086	5.75888	5.86776	6.12764	5.92335	6.38021	6.42259	6.14793	6.16326	6.0891	5.98088	6.05412	5.96678	6.07912	6.102
ENSG00000006747	SCIN	scinderin [Source:HGNC Symbol;Acc:21695]	7	protein_coding	3.3626	0.362759	1.11022	4.15853	2.01153	3.22779	1.59749	0.524963	1.24611	2.12928	2.86079	2.53466	1.74422	0.730295	0.255997	0.454092	-0.455057	0.769682	0.633356	2.11196	1.27809	1.41061	1.84893	4.09999	1.21233	1.64017	1.38038	0.890653	1.03334	1.21359	1.69334	2.15246	1.34061	2.13248	2.51359	1.17661	2.25147	1.76987	1.86512	1.04066
ENSG00000006756	ARSD	arylsulfatase D [Source:HGNC Symbol;Acc:717]	X	protein_coding	6.34789	6.01036	7.13935	4.43547	5.50528	6.78185	6.49905	6.58097	5.81566	6.65499	5.53449	6.27437	5.61165	7.50982	7.19086	7.13935	7.82554	6.71033	7.09683	6.76727	5.158	5.98914	6.48902	6.48516	6.35834	5.49256	5.71686	5.81935	4.21758	7.3756	4.65812	3.79301	6.45245	6.48848	6.60846	6.06073	5.94821	6.38937	5.43371	5.81795
ENSG00000006757	PNPLA4	patatin-like phospholipase domain containing 4 [Source:HGNC Symbol;Acc:24887]	X	protein_coding	3.60511	2.76157	2.81879	2.20867	2.36923	3.3183	3.62862	2.76628	2.84465	3.92049	1.83351	1.78853	4.20899	3.90189	3.62947	3.32751	4.48956	3.21174	3.64769	3.26014	2.21026	3.61411	3.68582	2.94434	2.31864	3.71622	2.47376	2.50654	2.4486	3.74276	0.222135	2.90205	3.15918	3.5445	3.83676	2.50384	3.17617	3.08514	2.75007	3.4915
ENSG00000006831	ADIPOR2	adiponectin receptor 2 [Source:HGNC Symbol;Acc:24041]	12	protein_coding	6.39552	6.8572	6.52042	4.93912	6.42937	5.77524	5.18422	5.67106	5.81531	5.71992	5.98877	5.22605	7.28477	6.17657	5.469	5.91864	6.51405	5.58014	5.61858	6.37707	5.34635	6.53265	6.22039	5.99239	5.95968	5.68748	5.06907	5.59942	7.68632	6.09129	5.84421	5.83243	5.41062	6.21499	7.03049	5.60016	5.49111	5.33131	5.7113	5.7404
ENSG00000007038	PRSS21	protease, serine, 21 (testisin) [Source:HGNC Symbol;Acc:9485]	16	protein_coding	-0.45177	-1.27191	-2.74546	2.17322	-0.485715	1.04066	-3.07457	-1.14884	2.65057	-3.71354	-2.54821	4.69986	-1.23659	-0.185086	-0.228283	0.711088	-0.45177	0.450123	-1.18575	-1.49657	3.41748	-0.764829	-1.7475	1.04749	0.480555	2.10376	2.38077	-0.916926	-2.61107	2.04418	-1.80019	2.52801	3.05575	-3.88353	-2.88307	3.90815	-1.26074	-3.37633	3.34309	-0.885774
ENSG00000007047	MARK4	MAP/microtubule affinity-regulating kinase 4 [Source:HGNC Symbol;Acc:13538]	19	protein_coding	5.10026	5.70951	4.63622	5.31378	4.54698	5.53852	4.05844	4.88415	4.88415	4.75791	4.34219	4.70461	4.53071	4.63185	4.64721	4.56326	4.63251	4.27374	4.38956	4.51078	5.31709	4.90478	5.54944	4.60441	4.4526	4.56779	4.88864	4.2979	5.51844	4.95326	5.07732	5.6397	4.46821	4.40095	5.81216	5.76359	4.64401	5.41477	5.06691	5.59977
ENSG00000007062	PROM1	prominin 1 [Source:HGNC Symbol;Acc:9454]	4	protein_coding	7.99046	8.44963	7.20282	0.989097	5.52809	4.21609	6.97574	7.63736	7.24544	1.96963	6.47426	5.55922	3.71664	7.06885	7.46843	6.13269	4.86603	6.21034	6.74071	5.85323	7.09928	6.15763	6.45109	3.85024	7.50164	5.14289	7.55279	6.98787	1.79886	2.72081	7.57467	0.325374	6.75421	6.59766	4.95922	5.722	2.60134	2.07774	5.14163	-1.06269
ENSG00000007080	CCDC124	coiled-coil domain containing 124 [Source:HGNC Symbol;Acc:25171]	19	protein_coding	5.71855	5.463	4.9377	5.03844	5.38192	5.177	5.33297	5.1058	5.37222	5.22144	5.13253	5.32053	5.30806	4.50744	4.11385	4.44763	4.80321	4.40135	4.66455	4.32695	5.96973	5.41447	5.18356	5.02357	5.37516	5.08589	5.78418	4.28208	5.34398	4.81006	6.74881	5.40217	4.43693	4.7295	5.43271	5.09702	5.84569	4.97279	4.75497	5.63089
ENSG00000007129	CEACAM21	carcinoembryonic antigen-related cell adhesion molecule 21 [Source:HGNC Symbol;Acc:28834]	19	protein_coding	0.249382	-1.39701	-2.94816	-1.00981	-1.30325	1.22567	0.515403	-0.485715	0.824368	0.283823	0.495768	-0.408006	-0.039068	-1.80019	-1.05826	-1.83147	-1.54675	0.933902	-0.128145	-1.71931	-2.03275	-0.40425	-1.08714	-0.61151	-0.592693	-0.871941	-0.569099	0.40949	-0.447737	-2.14308	-0.342972	0.0318332	0.0193518	-0.813885	-2.02371	-2.85359	0.877298	-2.76057	1.70322	0.371032
ENSG00000007168	PAFAH1B1	platelet-activating factor acetylhydrolase 1b, regulatory subunit 1 (45kDa) [Source:HGNC Symbol;Acc:8574]	17	protein_coding	6.18893	6.4773	6.63176	6.53107	7.07687	6.6131	6.60846	6.76136	6.74707	6.58677	7.30842	7.02385	7.02609	6.93514	7.0927	7.1555	7.01448	7.01738	7.21361	7.32977	5.82785	7.15367	7.19933	6.40613	6.03861	6.60337	6.18696	6.83817	6.31094	5.9112	6.59249	6.73785	6.66659	6.1761	6.51991	6.76191	6.09512	5.91273	6.5579	6.58928
ENSG00000007171	NOS2	nitric oxide synthase 2, inducible [Source:HGNC Symbol;Acc:7873]	17	protein_coding	0.909903	-1.74031	-1.50206	2.33324	-1.59982	-0.669123	0.913281	-1.28765	-1.96951	-0.880802	-0.508743	-1.03207	-0.0528097	-1.02328	-0.749405	-2.73246	-0.757209	-1.40355	-2.61107	-1.96951	-0.692532	-0.89958	-0.761069	-2.77504	-1.50867	0.581363	-0.862526	-2.32724	0.474325	-2.29644	0.725008	1.31674	-3.03605	-1.4384	-0.729657	-1.76105	1.05033	0.987586	-0.699718	0.662839
ENSG00000007174	DNAH9	dynein, axonemal, heavy chain 9 [Source:HGNC Symbol;Acc:2953]	17	protein_coding	-1.99535	-2.1243	-2.56157	1.57871	-0.784593	-2.25312	-1.54036	-2.09771	-1.57895	0.32962	-1.22626	-1.70624	0.949567	0.649911	0.205401	0.712702	-0.417279	-0.829881	0.929471	0.792025	-2.27426	-2.6652	-2.41223	-1.87909	-0.688831	0.482443	-3.20724	-2.16052	1.67961	0.0166287	-1.98749	-1.08219	-1.08219	-1.3686	3.41336	-2.21548	-1.35047	0.793587	-0.142496	-3.16724
ENSG00000007202	KIAA0100	KIAA0100 [Source:HGNC Symbol;Acc:28960]	17	protein_coding	7.25903	9.04008	8.45705	7.24457	7.89091	8.29915	8.54741	8.04824	7.69589	7.39572	8.05889	8.32319	8.06103	8.32319	8.10257	8.23734	8.24995	8.18581	8.02516	8.08051	7.64947	8.02516	8.16442	7.93376	7.47843	7.7919	7.69589	7.73099	8.61706	8.18102	8.80339	8.07833	8.36434	7.52397	7.90376	7.74193	7.64666	8.15038	7.64127	8.26014
ENSG00000007216	SLC13A2	solute carrier family 13 (sodium-dependent dicarboxylate transporter), member 2 [Source:HGNC Symbol;Acc:10917]	17	protein_coding	3.22028	1.20318	2.92287	-3.05397	-1.99535	-1.72575	-3.59201	0.283823	-4.36269	-0.253763	-0.986364	-0.780004	1.35778	2.45778	3.34565	3.89175	2.63239	3.68456	3.76323	3.37062	1.53502	-1.80887	-1.30829	0.627793	-4.30364	-1.89461	-0.414041	2.22323	-4.6566	-1.41522	-2.00421	-3.61956	-1.68588	-1.52052	-2.2428	-1.77541	1.85867	-2.2428	-0.0229565	-4.01423
ENSG00000007237	GAS7	growth arrest-specific 7 [Source:HGNC Symbol;Acc:4169]	17	protein_coding	3.76985	4.38386	5.08404	8.85537	5.9464	5.3874	5.89511	6.21622	4.60441	5.09763	6.37839	5.35964	6.48194	4.56296	5.90872	6.46769	5.366	6.23525	6.5637	6.14277	3.94603	5.47211	6.8407	6.73494	5.04029	5.07539	5.94146	6.65231	4.13344	5.76392	4.20968	6.01431	6.10163	5.32705	3.0815	4.70815	4.97184	4.83757	5.64604	6.30312
ENSG00000007255	TRAPPC6A	trafficking protein particle complex 6A [Source:HGNC Symbol;Acc:23069]	19	protein_coding	3.07722	3.97042	3.56392	2.69291	2.62924	3.95852	3.55862	4.59538	4.21719	3.96001	3.88581	4.71936	3.98197	3.93174	3.72704	3.68499	4.48638	3.38089	4.0122	3.5299	4.39091	4.80652	4.8622	3.68582	2.39286	3.5872	2.69417	3.97203	3.21321	4.90259	3.56905	4.54498	3.56176	2.91848	4.52779	4.5662	3.97042	2.61754	3.89615	2.75811
ENSG00000007264	MATK	megakaryocyte-associated tyrosine kinase [Source:HGNC Symbol;Acc:6906]	19	protein_coding	1.55442	1.70515	0.763029	2.4839	3.76088	2.52023	2.78161	2.67276	2.34893	4.43818	2.76336	2.3659	2.05799	0.611459	2.41907	1.70829	0.303584	2.6059	1.83984	1.28961	1.72713	3.85768	1.81654	2.77855	1.33358	2.17859	1.0205	2.77678	-0.148045	2.98548	1.93944	1.61459	2.57625	0.148841	0.919667	1.94441	0.550733	2.1102	3.17169	3.46711
ENSG00000007312	CD79B	CD79b molecule, immunoglobulin-associated beta [Source:HGNC Symbol;Acc:1699]	17	protein_coding	1.66586	2.8878	3.15388	-0.511978	0.672213	4.22014	2.11614	3.85972	4.87064	1.68152	5.49293	3.38832	3.43452	2.79725	2.16134	4.09694	1.64017	4.49538	4.55196	3.95474	1.35404	3.81948	1.24227	2.50457	3.35126	1.02605	1.22834	7.1795	1.89691	3.83078	3.17169	1.28832	6.95999	1.53176	-0.208264	1.46056	1.71431	1.36589	5.68712	1.36356
ENSG00000007314	SCN4A	sodium channel, voltage-gated, type IV, alpha subunit [Source:HGNC Symbol;Acc:10591]	17	protein_coding	-0.575938	-0.438711	-0.26313	-0.0528097	-0.849566	0.112177	-0.115787	-0.302019	-0.621663	-0.624961	0.761417	-0.0964117	5.85102	2.28366	1.49363	3.21569	2.07383	3.7759	2.01856	4.75465	-0.72573	-3.37633	-1.76105	1.14447	0.45626	-0.817866	-2.20601	0.238298	-0.849566	2.82459	-1.94408	0.675564	1.35045	0.294501	-1.05826	1.10061	0.0059225	0.205401	-0.228283	-2.61107
ENSG00000007341	ST7L	suppression of tumorigenicity 7 like [Source:HGNC Symbol;Acc:18441]	1	protein_coding	3.71664	3.24775	2.21026	3.18033	3.18794	2.56467	3.21569	2.86134	2.38077	2.85178	3.40069	2.87897	2.94709	2.98148	2.73744	2.6923	3.60149	2.59915	2.90205	3.60782	3.47888	3.36354	3.54406	2.98929	3.29635	3.02979	2.51225	3.02979	3.53209	3.24869	2.49105	3.54859	3.17878	2.99319	4.36811	2.77913	3.15972	4.51866	2.31554	3.6033
ENSG00000007372	PAX6	paired box 6 [Source:HGNC Symbol;Acc:8620]	11	protein_coding	3.71417	-0.718292	3.05744	2.49568	2.94653	1.43635	0.917994	-3.05397	3.01467	0.253677	-2.77504	6.27017	-3.45671	1.10325	-1.55316	-4.36269	-4.05566	-2.69094	-1.87909	-2.35918	3.90659	0.0244288	2.28294	-1.61318	-2.8221	3.00656	0.307836	-3.97327	-1.66391	2.50931	0.642193	4.34187	-3.31107	-2.17897	-2.32724	3.66745	-0.772024	1.42036	-2.31647	2.45511
ENSG00000007376	RPUSD1	RNA pseudouridylate synthase domain containing 1 [Source:HGNC Symbol;Acc:14173]	16	protein_coding	5.93562	5.907	6.20604	5.85289	6.24639	6.50824	4.94135	5.69571	5.46934	4.95049	5.3417	4.71425	4.77801	5.5892	5.0162	4.75465	5.17799	4.74161	4.98294	4.54156	6.48654	6.04645	5.87357	5.23809	4.70648	5.54055	4.72031	5.13191	5.45869	5.67889	5.41299	5.69026	5.17999	5.01077	5.19504	5.20934	6.08145	5.22144	5.49966	5.91757
ENSG00000007384	RHBDF1	rhomboid 5 homolog 1 (Drosophila) [Source:HGNC Symbol;Acc:20561]	16	protein_coding	4.84075	5.09202	5.32156	5.77088	5.58505	4.48036	4.25657	5.12937	4.52582	4.93078	4.4493	4.05508	4.71458	5.26952	5.47914	5.11742	4.93047	4.84167	5.08123	4.95266	4.03522	4.59054	5.27294	4.53477	4.43215	4.81756	4.626	4.66263	4.29141	4.74129	4.17628	5.25603	4.4755	5.33034	4.06403	5.09139	4.78445	3.87708	4.02246	3.77217
ENSG00000007392	LUC7L	LUC7-like (S. cerevisiae) [Source:HGNC Symbol;Acc:6723]	16	protein_coding	5.31312	4.27202	5.21093	6.27479	6.14197	4.49604	4.9839	5.55808	5.09262	4.80103	4.8648	4.29011	5.13443	5.08374	5.71955	5.60916	5.32187	5.88486	4.94104	5.77448	4.14991	4.26094	6.20823	5.84843	4.03843	5.23439	4.74416	5.92373	5.2135	5.55443	4.43947	5.30262	5.78567	6.43486	4.5183	5.40569	5.33569	5.91162	5.22763	4.86352
ENSG00000007402	CACNA2D2	calcium channel, voltage-dependent, alpha 2/delta subunit 2 [Source:HGNC Symbol;Acc:1400]	3	protein_coding	-5.69213	-1.61912	-0.0499645	2.13014	-1.09744	-0.565554	-0.880802	-1.10386	-1.28235	-0.688831	-1.56633	2.06346	1.1867	2.37356	2.29682	2.40416	2.90149	0.824368	1.73792	1.54271	0.203239	1.44599	-0.582528	0.774865	0.194366	2.22253	0.053835	-0.234747	-0.110493	2.19415	-1.59982	1.01888	-0.0150619	0.79032	2.50196	0.673899	1.45948	0.217837	-0.651321	0.922559
ENSG00000007516	BAIAP3	BAI1-associated protein 3 [Source:HGNC Symbol;Acc:948]	16	protein_coding	4.00361	-0.937447	3.21517	1.61252	4.77583	1.50886	-0.55845	1.94105	0.417902	0.751064	1.33944	1.5576	3.46259	3.74635	4.1135	2.77735	4.2727	3.93064	3.4698	4.06973	1.29877	2.12594	0.776595	1.4119	0.798304	2.16825	0.175379	2.67214	-0.165269	-0.16835	1.5234	1.76148	3.17565	1.85867	2.46114	0.862061	2.15987	0.811319	-0.268916	2.49168
ENSG00000007520	TSR3	TSR3, 20S rRNA accumulation, homolog (S. cerevisiae) [Source:HGNC Symbol;Acc:14175]	16	protein_coding	6.03371	6.06707	6.30146	5.31803	5.79784	6.1645	5.55147	5.77211	5.84347	5.98344	5.65744	5.57357	5.78846	6.01113	5.25175	5.58014	5.65945	5.25207	5.50126	5.45386	6.02899	5.57459	6.30699	5.71922	5.51938	5.93892	5.44239	5.34508	5.79932	5.85937	5.67716	5.85972	5.07095	5.53217	5.79029	5.33429	6.40613	5.35312	5.58539	5.63509
ENSG00000007541	PIGQ	phosphatidylinositol glycan anchor biosynthesis, class Q [Source:HGNC Symbol;Acc:14135]	16	protein_coding	5.53146	4.83605	5.45689	5.44929	5.60744	6.06791	5.30422	5.29765	4.65974	5.44433	5.09005	4.28133	5.54837	5.48545	5.29433	5.50359	5.8785	4.95559	5.3874	5.27891	4.5068	5.48047	5.90519	4.96954	4.73425	5.30066	4.41979	5.07603	5.30029	5.99744	3.95327	5.19197	4.72752	5.96189	4.90131	4.78573	5.25792	5.1542	4.6931	5.14163
ENSG00000007545	CRAMP1L	Crm, cramped-like (Drosophila) [Source:HGNC Symbol;Acc:14122]	16	protein_coding	5.91722	4.80321	5.5432	6.24639	5.62433	5.34887	5.12032	5.83883	5.87633	4.86317	5.08345	4.79117	5.23809	5.86659	5.82706	5.85652	5.78813	5.61726	5.86822	5.58343	5.98914	4.94041	5.62369	5.32347	5.12358	5.71203	5.18031	5.42653	5.17799	5.86822	5.11018	5.69125	5.30029	5.65881	5.6397	5.16049	5.8503	5.93782	4.66968	4.60698
ENSG00000007866	TEAD3	TEA domain family member 3 [Source:HGNC Symbol;Acc:11716]	6	protein_coding	5.62266	5.18389	5.06335	4.03881	5.57907	5.92442	5.15704	4.58826	4.97309	4.50877	4.88259	5.19852	4.31144	5.21221	5.87892	5.04356	5.30066	4.49254	5.4361	5.61416	4.36712	4.93708	5.36962	4.83515	5.82528	5.62197	6.01198	5.03714	4.70461	5.31218	4.43755	5.43641	4.72527	5.06436	4.56588	4.00246	4.70648	5.21544	4.45227	4.96084
ENSG00000007908	SELE	selectin E [Source:HGNC Symbol;Acc:10718]	1	protein_coding	-0.0304894	5.72959	3.69406	-0.565554	2.19937	2.44652	0.661115	4.35567	3.66218	2.29749	2.53055	3.09206	4.09728	3.22923	3.90231	5.62708	-0.631748	6.05412	2.95435	5.53689	0.792025	2.45511	-2.04984	3.17466	4.74669	1.49572	3.29583	5.62641	7.06885	3.74876	3.34941	2.07383	4.23488	4.10109	3.3163	3.2666	-0.156555	-1.49657	3.68322	-1.65741
ENSG00000007923	DNAJC11	DnaJ (Hsp40) homolog, subfamily C, member 11 [Source:HGNC Symbol;Acc:25570]	1	protein_coding	5.25362	5.42921	4.8113	5.57706	4.70302	5.27263	5.45833	4.70175	6.41285	5.54979	4.66007	5.39789	4.87665	4.77139	4.83546	4.59569	4.4938	4.76561	4.75086	4.82487	6.5306	5.22144	3.78319	5.6543	4.95863	5.25888	4.80745	4.56779	5.40309	4.85229	5.95442	5.45035	5.03043	5.04657	5.34067	5.62541	5.41576	5.88002	5.19921	5.61488
ENSG00000007933	FMO3	flavin containing monooxygenase 3 [Source:HGNC Symbol;Acc:3771]	1	protein_coding	1.15773	0.426041	0.0193518	-0.753411	7.37462	3.10204	1.37928	2.39619	3.43608	2.38719	2.77563	0.0946891	4.50816	-0.37739	-0.134468	0.0889864	1.06909	2.4509	0.844362	3.70944	-0.534745	1.23817	1.19923	4.41511	1.52543	1.18035	0.989097	1.84069	-0.817866	0.594812	0.484412	1.04881	2.33031	-0.468076	1.47468	-0.555282	2.97011	-0.521797	6.49799	1.38954
ENSG00000007944	MYLIP	myosin regulatory light chain interacting protein [Source:HGNC Symbol;Acc:21155]	6	protein_coding	6.58987	4.04603	5.31741	5.92726	5.24944	6.4738	4.8348	5.38292	4.61538	5.37969	4.74287	5.3774	6.78931	6.7859	6.40785	6.91624	6.15597	6.08675	5.99491	6.4815	4.53787	4.21536	5.69026	6.34686	5.3686	5.31408	4.30117	5.76392	5.43808	6.21538	4.52185	4.23376	5.62985	6.08068	6.58149	3.4649	5.03936	5.14574	5.38709	5.21093
ENSG00000007968	E2F2	E2F transcription factor 2 [Source:HGNC Symbol;Acc:3114]	1	protein_coding	5.72894	5.71548	4.45293	4.58119	3.41013	4.41149	4.26469	2.94653	4.62862	4.09192	4.47486	4.78573	0.666528	2.63708	1.69334	0.659018	1.48018	2.2743	0.644465	-0.2787	6.39883	5.96441	4.3073	3.46004	3.67085	3.43882	3.94188	1.76511	5.12032	2.38285	6.43711	5.19135	3.32412	3.79417	6.28033	3.66618	4.32798	4.69217	3.66266	3.73322
ENSG00000008018	PSMB1	proteasome (prosome, macropain) subunit, beta type, 1 [Source:HGNC Symbol;Acc:9537]	6	protein_coding	6.09403	7.06085	6.74013	5.85358	6.51017	6.55271	6.54008	6.94293	6.38021	6.51896	7.22369	6.21363	6.6363	6.26666	6.01233	5.96864	6.08756	6.2692	6.3256	6.23159	6.52251	5.99744	6.27479	6.00804	6.24843	6.77769	6.90152	6.07912	7.1891	6.34789	6.34957	6.83174	6.41692	5.62299	6.49113	6.29406	6.31793	6.62976	6.43124	6.52682
ENSG00000008083	JARID2	jumonji, AT rich interactive domain 2 [Source:HGNC Symbol;Acc:6196]	6	protein_coding	5.62334	5.66657	5.89983	5.66206	4.8928	6.43395	5.55011	5.38396	6.06666	4.65233	5.70878	5.51906	4.35667	5.62575	5.04122	5.19921	4.87221	5.01849	4.9874	4.80523	4.90447	5.43975	6.70926	5.51004	6.58518	4.73898	5.21058	5.79932	6.24766	6.24424	6.02502	6.03321	5.81039	5.32604	5.53254	4.99766	5.52504	6.04089	5.71375	5.3637
ENSG00000008086	CDKL5	cyclin-dependent kinase-like 5 [Source:HGNC Symbol;Acc:11411]	X	protein_coding	4.27445	4.40239	3.48156	4.69951	4.51667	3.6819	3.74439	3.86093	3.83909	3.72459	2.21713	3.44943	2.73573	3.94335	3.34211	3.15918	2.74763	2.8541	3.08514	3.37623	3.74276	3.78918	4.95049	3.14492	2.58599	3.7452	3.85645	3.03584	3.8458	3.44805	3.21373	3.6692	3.17671	3.61723	4.20174	4.487	4.47718	4.5792	2.98817	3.88146
ENSG00000008128	CDK11A	cyclin-dependent kinase 11A [Source:HGNC Symbol;Acc:1730]	1	protein_coding	3.6692	2.67834	2.84577	4.66617	3.36586	3.4698	3.64391	3.08776	3.92466	3.53338	3.91505	3.37205	3.77966	2.95709	4.00688	3.32412	3.09105	4.16427	3.23191	3.76826	4.51866	3.85855	3.00497	3.70904	3.42132	3.03855	3.21517	3.9769	3.84693	4.02472	4.05467	3.30374	4.36548	3.42557	3.73148	4.86603	4.03267	4.57851	4.16676	4.00808
ENSG00000008130	NADK	NAD kinase [Source:HGNC Symbol;Acc:29831]	1	protein_coding	5.70764	6.47426	5.60051	6.36287	6.13513	6.29144	6.07138	5.79433	6.74645	6.7453	6.17696	6.37621	6.73263	5.4704	5.72926	6.10394	6.09323	6.29617	5.84347	6.30963	6.72623	5.80351	5.06074	6.75299	5.5487	5.74139	5.70559	5.93035	5.62871	6.59462	6.21499	6.24047	6.20916	6.25222	6.45707	6.55479	6.07564	6.08337	6.6063	5.79136
ENSG00000008196	TFAP2B	transcription factor AP-2 beta (activating enhancer binding protein 2 beta) [Source:HGNC Symbol;Acc:11743]	6	protein_coding	-2.18871	-0.515132	2.86939	4.70975	-1.71296	-0.113008	6.36998	2.71257	-1.23659	8.26784	-1.41522	5.67507	3.055	5.72062	5.62504	5.54188	6.29838	4.49152	6.1645	4.58569	2.33455	-1.60731	-0.628265	6.26963	-2.6652	1.78676	-0.877	3.42267	0.0268566	7.96075	-1.25583	-3.33249	4.34692	7.49426	-2.36915	1.15773	6.98518	3.84425	-2.58747	-2.01333
ENSG00000008226	DLEC1	deleted in lung and esophageal cancer 1 [Source:HGNC Symbol;Acc:2899]	3	protein_coding	1.51591	0.285963	-1.25113	0.991881	0.0465807	-0.474573	-1.54036	-1.159	-0.374376	-1.40959	1.07476	-1.24632	2.08261	-0.891104	0.283823	-0.0528097	0.796725	0.230965	-0.159419	2.06267	0.631508	-0.349654	1.33829	-0.495705	-1.23659	1.27135	-0.841594	0.474325	0.664725	-1.14884	0.0244288	0.151029	1.4192	-0.969431	-0.137026	-0.205617	2.61892	0.662839	-0.107637	-1.159
ENSG00000008256	CYTH3	cytohesin 3 [Source:HGNC Symbol;Acc:9504]	7	protein_coding	4.94473	4.8385	5.86626	5.10644	5.61926	5.23084	5.17465	5.55922	4.40473	5.1577	5.38256	6.22753	6.39109	5.35932	5.12032	5.61339	4.77425	5.26712	5.75458	5.72028	5.51035	4.4526	4.71458	4.93372	4.1567	6.00962	4.72723	5.61826	4.48474	5.4474	5.9179	5.32932	4.70749	4.95592	3.82346	5.9734	5.27891	5.19696	4.05151	6.37882
ENSG00000008277	ADAM22	ADAM metallopeptidase domain 22 [Source:HGNC Symbol;Acc:201]	7	protein_coding	0.812923	5.56083	2.60326	3.19364	4.2538	0.251511	2.69928	3.53164	2.41406	3.21272	2.20009	2.78629	4.22937	3.2737	2.61509	2.97521	2.84356	3.22682	4.11569	3.13694	3.39311	3.07044	2.35249	1.26387	2.93573	2.58257	2.92526	4.0122	5.65219	3.51455	2.0013	2.88661	3.03911	2.8579	3.81671	2.86424	1.37812	3.7828	2.70105	2.59794
ENSG00000008282	SYPL1	synaptophysin-like 1 [Source:HGNC Symbol;Acc:11507]	7	protein_coding	6.04571	7.19086	6.76082	5.2533	6.39109	6.47929	6.74768	6.42937	6.26627	7.78695	6.86777	6.63733	6.61369	6.62446	6.62205	6.72567	6.87638	6.59567	6.7229	6.71949	5.66442	5.76794	5.79605	5.93137	5.83849	5.97835	5.49799	6.35928	6.02613	6.95298	6.793	5.70913	6.77462	6.50776	6.17021	6.30146	7.34885	5.28544	5.43146	5.41261
ENSG00000008283	CYB561	cytochrome b561 [Source:HGNC Symbol;Acc:2571]	17	protein_coding	7.37877	6.62144	7.09046	5.16308	6.25722	6.71892	7.6306	6.77696	5.6384	6.86643	6.22235	6.40014	5.28179	6.66157	6.39686	6.33173	7.00524	6.40245	6.90534	5.89511	6.6281	6.52297	6.86577	6.86516	6.69741	6.83676	6.57944	6.04497	5.61272	7.23192	6.84253	6.01036	6.00046	5.98987	6.39509	6.61101	8.60014	4.03451	6.23881	5.60744
ENSG00000008294	SPAG9	sperm associated antigen 9 [Source:HGNC Symbol;Acc:14524]	17	protein_coding	6.07138	6.81393	6.54102	6.43213	7.19594	7.00442	6.70246	6.45062	6.59462	6.38449	7.23709	7.03802	7.09046	6.62918	6.82931	6.83944	6.51896	6.94956	6.79901	7.23282	6.09055	6.87831	7.31041	6.75117	6.79842	6.59462	6.28793	6.891	6.45199	6.48289	7.77713	7.01521	6.56765	6.70466	6.65174	7.54558	6.69241	6.75242	6.81863	6.62656
ENSG00000008300	CELSR3	cadherin, EGF LAG seven-pass G-type receptor 3 [Source:HGNC Symbol;Acc:3230]	3	protein_coding	4.38421	2.76278	4.0748	3.65885	4.22431	3.44066	4.05314	2.53926	3.9184	3.18543	4.48173	6.48654	1.94441	3.51973	2.77855	1.79541	3.85685	1.52443	1.87349	2.41127	4.12403	1.96091	2.96907	3.24073	2.34095	4.4385	3.08949	2.18761	5.3923	3.89653	6.28543	3.31975	2.49039	2.64413	4.4095	4.53661	5.21887	3.06566	2.06969	4.32511
ENSG00000008311	AASS	aminoadipate-semialdehyde synthase [Source:HGNC Symbol;Acc:17366]	7	protein_coding	1.20175	2.70873	4.0402	4.06728	3.32695	2.37215	2.74578	3.3466	1.69628	2.82175	2.40137	2.26702	4.86966	4.54187	4.852	4.33953	3.65414	4.66744	4.68125	5.37646	4.33817	1.05181	3.22682	3.53533	3.41888	2.48195	3.13021	3.50856	1.49924	2.85119	3.04017	2.18761	3.9651	3.7045	2.75259	4.08189	2.1045	4.10109	2.09233	0.0658962
ENSG00000008323	PLEKHG6	pleckstrin homology domain containing, family G (with RhoGef domain) member 6 [Source:HGNC Symbol;Acc:25562]	12	protein_coding	0.0465807	5.62985	5.20347	-0.32394	4.45872	4.14013	2.13166	4.55388	5.14859	5.15062	3.88811	3.7395	5.40862	5.03011	4.32149	3.16467	3.28304	3.54406	4.24349	4.12333	2.80207	5.88665	3.79922	1.12126	4.02016	4.83757	4.58153	4.02166	5.68572	3.42835	4.52909	3.83637	3.62613	2.5711	4.55259	3.32809	3.32549	2.03575	1.88815	2.27152
ENSG00000008324	SS18L2	synovial sarcoma translocation gene on chromosome 18-like 2 [Source:HGNC Symbol;Acc:15593]	3	protein_coding	4.1928	3.89089	3.75632	2.55458	3.06889	4.02016	3.01254	3.49107	3.47979	2.46641	3.75312	3.22478	3.04435	3.34706	3.23857	2.96958	3.32021	2.67834	3.07884	2.95873	3.22077	3.67127	3.87093	3.29635	3.52187	3.21668	3.75437	2.84056	3.57004	2.84938	3.90422	3.98116	3.54818	2.95551	3.96112	4.31586	4.81976	2.36519	3.81134	3.35617
ENSG00000008382	MPND	MPN domain containing [Source:HGNC Symbol;Acc:25934]	19	protein_coding	4.0282	3.92988	3.67907	3.16851	3.44989	3.80467	4.18368	2.88128	3.32021	3.87747	4.07231	4.52715	3.6819	3.22874	3.51546	3.26969	3.91084	3.00548	3.32457	2.83138	3.96347	4.40803	3.79623	3.7872	3.87866	3.31736	3.43387	2.92139	3.02604	3.46158	3.60991	4.05691	3.12062	3.6033	3.39453	3.91202	3.87626	2.56114	3.80861	3.00343
ENSG00000008394	MGST1	microsomal glutathione S-transferase 1 [Source:HGNC Symbol;Acc:7061]	12	protein_coding	5.74617	6.94883	6.44175	1.39426	5.7189	6.96405	6.16531	7.06085	5.52636	6.80707	5.97566	5.48677	7.41088	5.68136	4.51933	4.45731	5.10516	4.76206	5.38256	5.7243	6.60223	7.57097	6.99938	7.16403	4.86866	6.10742	5.33837	4.7368	7.77876	8.29915	6.12359	4.94073	5.59028	4.85357	4.17696	6.09018	5.60051	3.07451	4.06099	6.40739
ENSG00000008405	CRY1	cryptochrome 1 (photolyase-like) [Source:HGNC Symbol;Acc:2384]	12	protein_coding	5.37646	4.26094	3.97278	5.13475	4.81601	4.80806	5.3144	3.7876	4.23454	4.73489	4.32888	4.54531	4.78573	3.97927	4.81195	4.90099	5.14957	4.3624	5.17212	5.79502	5.72791	4.62667	4.27084	4.8713	4.11743	5.33265	4.60795	4.07155	4.35473	4.4679	5.2481	5.01431	4.63025	4.81037	4.78348	5.13509	4.58793	4.37434	4.17994	4.55323
ENSG00000008441	NFIX	nuclear factor I/X (CCAAT-binding transcription factor) [Source:HGNC Symbol;Acc:7788]	19	protein_coding	8.7346	6.51309	7.95297	7.74665	6.94749	5.5518	5.35669	7.74193	6.40014	4.46361	7.3756	7.58105	7.40984	7.82896	7.47106	7.41806	6.90922	6.92171	7.53562	7.26075	8.66919	6.57395	7.00731	7.71252	7.11539	5.63054	7.53309	6.8407	6.58987	6.21239	8.97025	8.54741	6.23842	5.43439	4.43662	9.44634	6.55428	7.86924	4.5558	7.19851
ENSG00000008513	ST3GAL1	ST3 beta-galactoside alpha-2,3-sialyltransferase 1 [Source:HGNC Symbol;Acc:10862]	8	protein_coding	9.19733	5.79251	4.77331	5.86115	5.14193	6.89491	5.77558	5.50126	5.91017	6.81624	6.14161	6.18306	5.78954	5.11257	5.30646	5.61375	5.98721	5.73455	5.74311	6.0799	6.40465	5.34508	5.13705	6.07836	5.96723	5.1387	6.26666	6.02073	3.85565	6.10977	5.30584	5.73753	6.30105	6.30911	2.91633	4.99543	5.58886	6.34502	6.88556	6.99861
ENSG00000008516	MMP25	matrix metallopeptidase 25 [Source:HGNC Symbol;Acc:14246]	16	protein_coding	1.94717	1.05033	0.809683	3.83119	1.10325	3.06992	1.35533	1.78317	2.53599	1.84245	2.87775	2.17859	2.74503	0.662839	0.769682	1.13903	2.29122	2.59339	0.526851	2.39771	4.79285	1.21104	1.27809	1.91009	0.392776	1.71339	0.246973	2.59096	0.759591	0.0514021	4.30185	2.69987	2.30054	0.579514	0.684193	-0.521797	1.44704	-1.23659	2.88128	2.65947
ENSG00000008517	IL32	interleukin 32 [Source:HGNC Symbol;Acc:16830]	16	protein_coding	5.05376	7.17074	5.67475	2.86249	6.51359	6.73549	6.40654	5.7683	7.57725	5.85759	6.58987	6.94226	4.92984	5.62871	5.35249	5.5674	3.4031	6.23683	4.85791	4.49604	7.29448	7.77388	3.44207	5.81712	5.79784	5.31679	7.34352	7.0373	6.92107	4.43693	7.06568	6.0131	6.39467	5.71167	2.65822	4.8741	5.17897	3.01862	7.7019	7.93186
ENSG00000008710	PKD1	polycystic kidney disease 1 (autosomal dominant) [Source:HGNC Symbol;Acc:9008]	16	protein_coding	6.80774	6.28074	7.20987	8.54097	7.00731	6.56818	6.57289	7.59361	6.85965	6.50392	6.66434	6.46956	7.74036	7.83585	7.84802	7.93758	7.1795	7.93376	8.18581	7.99448	6.65715	4.9886	7.20456	6.87638	5.49799	7.43079	6.76978	7.03802	6.11968	7.29944	6.18696	6.88817	7.05388	7.23878	6.31493	6.84253	7.04177	8.64113	6.26135	7.23622
ENSG00000008735	MAPK8IP2	mitogen-activated protein kinase 8 interacting protein 2 [Source:HGNC Symbol;Acc:6883]	22	protein_coding	2.14549	4.18202	3.04435	5.57837	4.77523	6.46319	6.02	0.607599	4.50816	6.34642	4.41277	4.14299	2.09138	3.18746	3.37856	2.49999	4.65297	2.53599	2.62089	2.91686	4.0535	4.8619	1.85699	3.68322	0.0117867	2.65357	3.60824	1.9816	4.28345	5.65881	4.25248	1.4641	0.821336	2.59034	2.95003	3.32862	3.87866	2.96276	1.34451	2.58662
ENSG00000008838	MED24	mediator complex subunit 24 [Source:HGNC Symbol;Acc:22963]	17	protein_coding	5.24711	5.3023	5.68642	5.27825	6.28634	5.67407	6.793	5.71441	5.67716	5.08652	6.48379	5.89441	5.70559	5.73357	5.92808	5.95663	6.08832	5.88002	5.59977	6.05212	6.28793	6.83174	6.0374	5.55147	5.81423	5.19599	5.62805	5.62129	6.31356	5.00602	6.67642	5.7539	5.41544	5.19043	6.72057	6.31094	5.53617	5.82853	5.62433	5.87253
ENSG00000008853	RHOBTB2	Rho-related BTB domain containing 2 [Source:HGNC Symbol;Acc:18756]	8	protein_coding	3.61545	3.73827	4.4643	5.26857	4.12657	3.725	4.24313	4.44468	3.73414	3.954	3.89924	3.60065	4.81227	4.43474	5.06335	4.91512	4.93311	4.95205	5.24644	4.81976	3.72825	3.58679	4.1185	4.55062	3.06296	4.36712	4.13903	4.88607	4.85991	4.36611	2.78029	4.4167	5.38967	3.69672	4.65845	4.07373	3.63816	6.08262	4.00918	3.48245
ENSG00000008869	HEATR5B	HEAT repeat containing 5B [Source:HGNC Symbol;Acc:29273]	2	protein_coding	5.87737	5.50294	5.66928	4.44633	6.11609	5.4203	6.0525	5.98646	5.48877	5.51875	5.91496	6.13964	5.60949	5.72959	5.85428	6.07294	6.03274	6.07018	5.76392	5.79747	5.79284	5.7514	5.34887	5.61592	5.66553	5.74998	5.57947	6.00342	5.43672	5.91972	5.97938	5.85251	6.48791	5.74516	5.44929	5.34508	5.39709	5.47977	5.40665	5.17465
ENSG00000008952	SEC62	SEC62 homolog (S. cerevisiae) [Source:HGNC Symbol;Acc:11846]	3	protein_coding	6.59619	6.12722	6.52968	6.60123	6.197	6.22275	6.64882	6.37839	6.51754	5.77984	6.52824	6.13798	7.30037	6.67905	6.68146	6.69182	6.84319	6.7911	6.91394	6.85012	5.40862	6.88685	6.30568	6.16667	6.57993	6.40465	6.53014	6.82996	6.49366	6.72117	5.77844	6.03016	6.55171	6.02384	6.70188	6.09585	7.51896	5.84636	7.08315	7.04395
ENSG00000008988	RPS20	ribosomal protein S20 [Source:HGNC Symbol;Acc:10405]	8	protein_coding	9.07654	10.2042	10.0767	9.58829	9.78189	10.203	9.22933	9.75694	9.49189	9.51868	10.5108	10.5438	9.89651	10.0341	9.70857	9.85109	9.84221	9.80736	9.82466	9.75694	9.62462	9.78189	8.62047	9.19207	8.32589	7.92429	9.63201	9.73251	8.90522	9.61727	9.86003	9.45275	10.0341	9.12055	9.39009	8.44806	8.70878	9.22395	9.17124	9.37187
ENSG00000009307	CSDE1	cold shock domain containing E1, RNA-binding [Source:HGNC Symbol;Acc:29905]	1	protein_coding	9.17641	9.80868	9.16094	9.24564	8.53137	9.34208	9.25662	9.58115	9.02465	8.55065	9.34799	9.53916	9.58115	9.32453	9.18683	9.31296	9.39009	9.13054	9.47871	9.27327	8.94822	9.42103	8.69424	9.21858	9.10572	9.11559	9.7652	9.24564	9.89651	9.98305	9.11559	9.13556	9.47871	9.06219	9.62462	8.87178	8.93085	9.48528	9.02465	9.7652
ENSG00000009335	UBE3C	ubiquitin protein ligase E3C [Source:HGNC Symbol;Acc:16803]	7	protein_coding	5.49799	7.24832	7.42246	7.47479	6.50439	6.95712	6.73439	6.71033	6.94749	7.49552	7.34885	7.55677	6.35882	6.83616	6.34913	6.23041	6.56152	6.18813	6.46568	6.1818	7.43286	6.77036	6.24805	6.40873	6.54417	7.10096	6.97279	6.40056	6.93094	6.80404	7.43079	6.4773	6.63995	6.63333	6.57395	6.78645	6.32833	6.62606	6.28673	6.23002
ENSG00000009413	REV3L	REV3-like, polymerase (DNA directed), zeta, catalytic subunit [Source:HGNC Symbol;Acc:9968]	6	protein_coding	5.71686	6.40201	6.00383	5.17965	6.3074	5.64407	6.0181	6.44328	6.70522	5.56231	5.97046	5.92265	6.56049	6.11223	6.47778	6.14477	5.6384	6.31702	5.85652	6.28275	6.23445	5.81463	6.17378	6.40245	4.97913	5.43737	6.22753	5.92726	6.18062	6.06577	6.28713	6.8824	6.41837	5.95191	7.25706	6.03089	6.17104	6.81393	5.8785	6.43074
ENSG00000009694	TENM1	teneurin transmembrane protein 1 [Source:HGNC Symbol;Acc:8117]	X	protein_coding	-0.551249	0.189468	2.23921	2.45013	3.30184	4.55098	0.872482	1.70126	0.315056	1.86333	2.77318	1.79886	3.03799	2.63437	2.3659	2.91249	2.11998	2.2254	0.0710442	3.00497	2.50524	0.294501	-0.665652	4.52288	4.88197	2.99483	-1.39086	1.76987	0.900509	0.596903	1.04066	1.21792	2.47177	0.0341938	1.03932	5.32378	1.10325	4.13869	1.29336	-1.54675
ENSG00000009709	PAX7	paired box 7 [Source:HGNC Symbol;Acc:8621]	1	protein_coding	-1.19026	-5.45477	0.240459	3.85768	-5.69213	-5.26717	2.12681	-5.45477	-5.45477	2.87775	-5.69213	5.7575	-2.94816	-1.21555	-1.88724	-6.16116	-5.69213	-6.06751	-5.69213	-2.79053	-3.05397	-2.96472	-5.98265	-4.57153	-5.45477	3.73452	-5.45477	-6.15548	-6.0704	-5.69213	-5.11295	-5.69213	-5.69213	5.83883	-2.5992	-1.30325	5.18581	4.01712	-1.02771	2.58014
ENSG00000009780	FAM76A	family with sequence similarity 76, member A [Source:HGNC Symbol;Acc:28530]	1	protein_coding	4.80683	4.44335	3.53444	3.74557	3.28755	3.4872	3.5358	3.15283	3.40829	4.01067	3.27586	3.97927	4.97746	3.9337	4.0887	3.61768	3.06834	3.52631	4.08666	4.20694	4.13123	3.92466	3.77842	3.80389	3.76985	3.7172	3.53899	3.16321	3.21872	3.18845	4.36878	4.02553	3.4658	3.67436	3.88068	3.40069	4.35567	3.67222	3.25449	3.39636
ENSG00000009790	TRAF3IP3	TRAF3 interacting protein 3 [Source:HGNC Symbol;Acc:30766]	1	protein_coding	2.77254	2.93984	2.74263	2.34816	3.53487	4.43118	3.4115	4.64433	5.09355	3.16417	5.25635	3.67685	1.71636	1.15004	3.68623	3.96223	2.15844	5.19729	3.34941	3.04545	2.89788	4.08666	5.62129	4.04317	3.18845	2.55458	2.62739	6.39927	4.92391	3.99924	4.74031	2.91196	6.75054	4.6906	1.07045	2.70873	2.40285	2.20708	6.03823	3.31147
ENSG00000009830	POMT2	protein-O-mannosyltransferase 2 [Source:HGNC Symbol;Acc:19743]	14	protein_coding	5.03714	4.1567	4.01518	5.47847	4.40671	3.91689	3.81172	4.28511	3.51042	5.42093	3.92538	4.5399	4.1532	4.25112	4.46886	4.72391	4.62505	4.24132	4.3238	4.57991	4.28511	3.42646	3.73491	4.70553	4.97716	4.97716	3.58063	3.3517	3.62658	4.27683	4.42373	5.00571	3.58239	4.96179	4.64786	4.97051	4.76436	4.09373	3.32172	4.39188
ENSG00000009844	VTA1	vesicle (multivesicular body) trafficking 1 [Source:HGNC Symbol;Acc:20954]	6	protein_coding	4.66039	4.52682	5.20029	4.65136	5.14574	5.31312	5.40765	5.36931	4.96824	4.97309	5.44433	5.02612	4.54373	4.66327	4.47965	4.54218	5.03814	4.41382	4.55421	4.49992	5.83359	5.0208	5.24878	4.83977	4.61053	5.86188	5.56295	4.61796	6.23002	5.27592	5.605	6.18853	4.9627	5.00065	5.85102	5.35381	6.12608	5.58539	5.07443	5.81497
ENSG00000009950	MLXIPL	MLX interacting protein-like [Source:HGNC Symbol;Acc:12744]	7	protein_coding	0.415814	-1.31844	0.189468	-1.04957	-0.596162	1.27135	-0.374376	-1.22626	-1.66391	-0.718292	0.0465807	-0.592693	6.47336	3.02043	1.18944	1.00851	1.93944	2.33593	1.60179	4.46064	-0.707412	1.59309	-2.13433	1.17258	0.510901	2.78029	-0.438711	2.3821	1.64405	2.55393	0.529137	2.36152	0.261595	1.50231	3.40212	0.853987	-0.468076	-0.572741	-1.10833	0.531157
ENSG00000009954	BAZ1B	bromodomain adjacent to zinc finger domain, 1B [Source:HGNC Symbol;Acc:961]	7	protein_coding	6.76838	6.90011	7.0927	6.51991	7.10565	6.91326	6.73727	6.88494	7.40984	7.50757	6.44785	7.11297	6.59199	6.88169	6.59094	6.74353	6.44829	6.74299	6.65388	6.64047	7.49911	7.62401	6.94502	6.8584	7.62265	7.95297	7.57725	7.10251	7.66524	7.34352	7.43952	7.42592	7.38817	6.82858	7.48067	6.94369	7.02385	7.18037	7.06462	6.91326
ENSG00000010017	RANBP9	RAN binding protein 9 [Source:HGNC Symbol;Acc:13727]	6	protein_coding	5.93705	4.59442	5.40536	5.69506	5.44401	6.01465	5.6206	5.25952	5.71304	5.00571	5.17273	5.5204	5.0459	5.0208	4.85486	4.99328	4.95592	5.03905	4.92799	4.68379	5.06597	5.60227	6.63682	5.26079	6.07601	5.49589	5.75069	5.33464	6.20777	5.66895	5.7618	5.93388	5.38802	5.36027	5.71788	4.79153	5.55736	6.20303	5.2739	5.88042
ENSG00000010030	ETV7	ets variant 7 [Source:HGNC Symbol;Acc:18160]	6	protein_coding	0.869339	3.5723	1.53502	0.255997	2.2905	4.86053	1.54698	0.788592	4.21758	2.35097	2.25065	3.10261	-0.195894	-0.929116	0.774865	0.377685	0.187052	1.39065	1.59749	0.0710442	2.26268	4.28411	1.16313	1.39307	2.79785	1.35533	1.77557	1.98921	3.72866	0.343065	3.52811	1.97651	1.28296	1.60581	2.3339	0.680617	0.763029	-0.182274	4.65432	1.50566
ENSG00000010072	SPRTN	SprT-like N-terminal domain [Source:HGNC Symbol;Acc:25356]	1	protein_coding	3.74876	4.69404	4.7771	4.65653	4.46886	4.59633	4.5847	4.83605	4.15388	4.79602	5.09732	4.5989	4.38005	4.48956	4.64142	4.41277	4.2229	4.54531	4.36645	4.61277	4.81257	4.35169	4.48603	4.2229	4.05767	4.64914	4.21332	4.27084	5.22349	4.62086	5.01953	4.05546	4.35136	3.8996	3.98197	4.71969	4.58153	4.62959	3.94226	3.64095
ENSG00000010165	METTL13	methyltransferase like 13 [Source:HGNC Symbol;Acc:24248]	1	protein_coding	6.21951	5.33165	6.6131	5.84636	5.67577	6.28634	5.90262	6.15961	6.92171	6.5382	6.49366	6.5185	5.40896	6.07491	5.34635	5.72097	5.5674	5.77591	5.43439	5.18515	6.51451	6.6199	6.51155	5.86733	6.39364	5.88172	5.99456	5.6707	6.72677	6.58298	6.68758	5.47318	5.72028	5.96678	5.23668	6.92313	5.07473	5.9432	5.59476	5.10026
ENSG00000010219	DYRK4	dual-specificity tyrosine-(Y)-phosphorylation regulated kinase 4 [Source:HGNC Symbol;Acc:3095]	12	protein_coding	1.79454	4.00066	3.91879	2.35611	3.06296	2.48845	1.61861	3.33947	2.85119	2.76099	2.60529	1.587	1.74225	2.82402	2.13947	2.2537	2.4197	2.01153	2.29682	2.21026	3.46711	4.30899	2.56811	2.63167	2.29749	3.06296	2.9404	2.65616	3.42457	1.96418	3.57459	3.62313	2.72451	3.00182	4.5662	3.62569	1.8605	2.32679	3.44112	3.92049
ENSG00000010244	ZNF207	zinc finger protein 207 [Source:HGNC Symbol;Acc:12998]	17	protein_coding	7.04544	6.84319	7.1891	7.07282	7.50529	7.22709	7.55419	7.85681	7.68632	6.94812	7.72789	7.70492	7.04325	7.53309	7.76579	7.54298	7.42592	7.89456	7.50868	7.68495	7.22369	7.10251	7.6306	7.80858	6.77769	7.20369	6.81146	7.78203	7.56043	7.2551	7.78695	7.52397	7.79687	7.73099	7.0745	7.41088	7.08002	7.82896	7.61012	7.17507
ENSG00000010256	UQCRC1	ubiquinol-cytochrome c reductase core protein I [Source:HGNC Symbol;Acc:12585]	3	protein_coding	7.29737	7.18369	7.22369	6.22117	7.02531	7.32664	7.06382	6.72511	6.97843	7.02907	7.1446	8.53137	7.28191	6.97982	6.84578	6.87979	7.03949	6.65231	7.06885	6.73263	7.19434	7.55419	7.23622	7.16574	6.68307	7.29944	6.7966	6.44227	7.37763	6.73088	7.47602	7.72171	6.70299	6.55582	7.44284	7.19851	6.0139	6.33005	6.74938	6.41096
ENSG00000010270	STARD3NL	STARD3 N-terminal like [Source:HGNC Symbol;Acc:19169]	7	protein_coding	3.80783	4.32086	4.31107	4.95498	3.83637	3.56712	4.25855	3.74354	3.50011	4.21404	3.5723	4.60634	4.29656	3.89615	3.88736	3.34706	3.73282	3.65072	3.76579	3.69114	4.56163	4.23628	4.73551	3.94408	3.99813	4.82893	4.65587	3.7197	4.62568	4.25045	4.44076	2.46914	3.954	4.18756	3.90231	3.41656	4.9737	4.15287	4.23278	5.90296
ENSG00000010278	CD9	CD9 molecule [Source:HGNC Symbol;Acc:1709]	12	protein_coding	8.37838	7.7263	7.54799	6.20058	7.4818	6.40785	7.21528	7.53309	7.38596	7.20016	7.12456	6.7966	5.48239	7.64947	7.39671	6.72511	7.3839	6.5336	7.46162	6.95508	5.89441	8.97025	6.71551	7.26856	6.83174	7.30936	5.91572	6.23722	7.93949	7.02978	6.18933	6.69021	6.49261	7.06639	8.92655	6.54417	7.19514	6.20872	6.03896	5.5728
ENSG00000010292	NCAPD2	non-SMC condensin I complex, subunit D2 [Source:HGNC Symbol;Acc:24305]	12	protein_coding	6.95165	7.78354	7.38923	6.7966	7.62401	7.11539	6.5087	7.85153	7.37664	5.69443	6.99711	6.7098	5.2533	6.46568	6.06791	6.33726	6.08414	6.17906	5.61198	5.46063	7.12945	8.38972	7.79854	7.16667	6.54362	6.37273	6.17657	6.35165	9.33036	6.13118	7.62401	7.83758	6.64178	5.81712	7.86034	6.98449	6.43213	6.73614	6.55271	6.9148
ENSG00000010295	IFFO1	intermediate filament family orphan 1 [Source:HGNC Symbol;Acc:24970]	12	protein_coding	3.50996	2.83011	3.24222	3.25902	4.83726	3.90617	4.33717	4.47415	3.73749	3.96779	4.6841	3.57853	4.80974	3.06677	3.88297	4.26165	3.43926	5.4552	4.40803	4.54088	2.81042	3.07722	3.07343	4.74507	3.11342	4.05467	3.49474	5.12293	2.7966	3.5732	3.05275	3.32172	5.03647	5.06201	1.73169	3.16909	3.33213	2.9832	5.40631	3.93249
ENSG00000010310	GIPR	gastric inhibitory polypeptide receptor [Source:HGNC Symbol;Acc:4271]	19	protein_coding	0.426041	-0.977943	-1.45059	0.653513	-1.14884	1.07476	-0.718292	0.182555	0.7077	1.65081	0.670445	-0.841594	2.78224	-0.683566	1.55549	-0.0881223	1.83525	1.49363	0.682438	1.61026	-0.784593	-0.67628	-1.69983	-0.312066	-0.772024	-1.46189	-0.908375	1.34581	-0.737393	2.49367	-0.381468	0.537315	0.377685	0.644465	-0.829881	-0.391365	1.28047	1.19349	2.72513	2.45511
ENSG00000010318	PHF7	PHD finger protein 7 [Source:HGNC Symbol;Acc:18458]	3	protein_coding	3.22529	2.12774	1.9911	2.03299	1.32501	2.18539	2.02454	1.15263	-0.193091	0.885505	1.81561	2.859	3.55572	1.90031	1.90846	2.29749	3.34849	1.88092	2.32891	2.39424	1.90482	1.36837	2.1691	1.27809	1.34061	2.56948	1.06184	1.17258	1.60483	2.42039	2.71898	2.0178	1.31912	1.06324	1.98253	1.82463	2.02951	1.77938	1.68622	1.28675
ENSG00000010319	SEMA3G	sema domain, immunoglobulin domain (Ig), short basic domain, secreted, (semaphorin) 3G [Source:HGNC Symbol;Acc:30400]	3	protein_coding	4.42339	1.6479	3.89043	2.75388	5.20091	2.98427	2.63042	4.04997	2.62149	3.13279	3.73148	3.63384	8.37838	5.41734	4.95205	6.41555	5.56436	7.2128	5.84809	6.93031	2.0643	1.3589	0.723382	4.37941	4.6739	2.61629	2.03211	5.40056	2.55325	5.31312	1.4947	2.59735	4.84586	4.38619	4.59181	3.93025	2.37284	0.478185	3.64985	-0.00498035
ENSG00000010322	NISCH	nischarin [Source:HGNC Symbol;Acc:18006]	3	protein_coding	7.0001	6.02537	7.08315	6.99861	6.62503	5.79176	6.03052	6.90405	6.26666	5.98271	6.44697	6.32	6.88817	7.4373	7.5759	7.57725	7.2128	7.49426	7.18823	7.43286	6.54918	5.73721	5.70987	6.94502	6.05826	6.19941	7.31536	7.34686	6.17816	6.71496	6.4317	6.75421	7.26954	7.3712	6.23002	7.05459	5.96009	7.1335	6.58047	7.20819
ENSG00000010327	STAB1	stabilin 1 [Source:HGNC Symbol;Acc:18628]	3	protein_coding	6.69077	5.93352	6.83676	7.06234	7.1795	6.99335	7.7674	7.39257	6.58371	6.40149	7.09586	6.88622	8.34222	5.83642	6.93795	7.87821	6.51754	8.81521	6.95089	7.44057	6.58565	5.39991	5.68232	8.49057	6.6131	6.25886	6.55532	8.08928	5.92335	6.78931	4.94473	6.49011	8.14342	7.57348	4.32888	5.80566	6.20526	6.52142	7.68784	8.15504
ENSG00000010361	FUZ	fuzzy planar cell polarity protein [Source:HGNC Symbol;Acc:26219]	19	protein_coding	2.72081	4.13502	3.97243	4.10577	4.11814	2.67834	2.3793	3.9209	3.67222	2.86134	3.42457	2.98084	4.06904	4.40736	4.1327	4.53851	4.99147	4.20275	3.69928	4.28244	3.10584	1.14718	4.32315	3.4872	4.07373	2.4349	1.57076	3.49695	-0.0938486	3.13914	0.761417	1.30962	2.74892	2.9174	3.84083	3.23191	3.79963	3.21422	2.23378	3.71664
ENSG00000010404	IDS	iduronate 2-sulfatase [Source:HGNC Symbol;Acc:5389]	X	protein_coding	5.78638	8.4289	7.47106	6.65283	7.14697	5.82634	6.83676	6.68914	6.49059	6.79592	6.74245	6.33686	6.68307	7.51651	7.29844	6.6545	6.63226	7.05074	7.45021	7.24544	5.02114	6.49858	5.16696	6.11813	5.50294	6.40962	6.46415	6.67905	5.07939	5.75214	6.30822	5.87459	6.64302	6.0525	6.7836	6.80774	6.88883	6.02537	6.661	6.64047
ENSG00000010539	ZNF200	zinc finger protein 200 [Source:HGNC Symbol;Acc:12993]	16	protein_coding	3.99849	3.91801	4.30185	4.25216	3.52015	4.85669	3.61815	3.65072	4.13344	3.28755	4.2331	3.59692	4.03302	3.81592	3.68582	3.94335	3.88489	4.03628	3.39116	3.69546	4.19786	4.30938	4.52746	4.11458	3.90815	4.52485	3.91726	4.56941	3.95016	4.53006	3.89494	4.36712	3.84907	4.29313	4.6157	4.49604	4.03451	3.84041	4.25727	3.79584
ENSG00000010610	CD4	CD4 molecule [Source:HGNC Symbol;Acc:1678]	12	protein_coding	5.39296	5.18941	4.85169	4.76815	6.39364	6.86209	6.58248	6.58468	6.54566	5.93966	7.3733	6.19856	5.34821	4.24829	4.85638	6.01769	4.27411	6.73843	5.50604	5.458	4.90229	5.59587	4.68574	6.44502	6.11263	5.42364	5.59871	6.90152	5.33499	5.49182	5.43116	5.82853	7.22896	6.04336	3.14713	4.8703	5.12838	4.02053	7.44794	6.21622
ENSG00000010626	LRRC23	leucine rich repeat containing 23 [Source:HGNC Symbol;Acc:19138]	12	protein_coding	0.0389864	2.41199	1.5776	1.24098	2.76507	1.86139	1.96334	2.00301	1.95412	1.75691	2.58662	1.32741	1.39888	1.78119	1.86241	2.65116	3.46537	1.38038	2.44176	2.18851	0.958526	2.85119	2.72021	1.6479	1.88092	2.3043	0.27467	1.63711	3.5732	1.29081	1.98601	2.98763	0.871007	0.682438	3.18297	1.36837	2.2905	1.49015	1.02605	2.27222
ENSG00000010671	BTK	Bruton agammaglobulinemia tyrosine kinase [Source:HGNC Symbol;Acc:1133]	X	protein_coding	2.60923	3.13801	2.15401	1.76987	3.40918	4.58698	3.55946	3.71848	4.11421	2.98374	4.6504	3.84425	2.73122	1.43753	2.44589	3.04335	1.62892	4.16715	2.97229	2.06116	2.4319	3.24018	2.08336	3.7158	3.34054	2.54619	2.53184	5.30105	2.28366	3.62479	2.74949	2.73183	5.09323	3.26723	0.852428	1.72618	2.56301	1.73674	5.48011	3.21517
ENSG00000010704	HFE	hemochromatosis [Source:HGNC Symbol;Acc:4886]	6	protein_coding	2.68935	4.33145	4.77365	3.15708	3.37623	4.53302	4.58533	3.14763	4.49769	4.00031	4.5357	5.06754	4.33451	4.76238	4.64753	4.28443	4.74892	4.56326	4.63251	4.72327	2.39018	4.18477	1.50566	3.43452	4.36177	4.68574	3.82224	4.66327	4.79787	2.71655	3.336	4.80261	4.01756	4.48439	3.83834	3.73414	2.57365	0.757953	4.20275	1.91272
ENSG00000010803	SCMH1	sex comb on midleg homolog 1 (Drosophila) [Source:HGNC Symbol;Acc:19003]	1	protein_coding	5.32378	5.40995	5.38459	5.18484	4.03302	5.03369	5.3637	4.54631	4.73712	5.34697	5.1526	5.18744	4.5662	5.20347	5.09232	4.779	5.06754	4.61053	4.86998	4.95683	5.73099	5.25077	4.9817	5.28277	6.03932	5.07035	5.147	4.4762	4.77106	5.51938	5.56051	5.25362	5.09828	5.40503	5.40471	4.7695	4.85991	6.3483	5.03431	5.3125
ENSG00000010810	FYN	FYN oncogene related to SRC, FGR, YES [Source:HGNC Symbol;Acc:4037]	6	protein_coding	3.78558	5.19428	4.49925	5.18322	4.79816	4.93215	5.158	5.18613	5.37548	4.42272	6.02073	4.83348	6.20726	4.26803	4.55453	5.4351	4.46158	5.70987	4.84328	5.16855	5.13509	4.25888	5.73099	5.37024	4.10722	4.67328	5.32998	6.08675	4.79475	4.36378	4.45668	4.89779	6.32432	5.35413	7.6306	5.06238	4.23278	6.41143	6.10903	6.739
ENSG00000010818	HIVEP2	human immunodeficiency virus type I enhancer binding protein 2 [Source:HGNC Symbol;Acc:4921]	6	protein_coding	6.17218	6.00192	6.33092	6.35335	7.00302	6.45338	6.5336	6.66277	6.06416	6.72786	6.37536	5.80712	6.40873	5.89227	6.17816	6.19661	5.47552	6.23159	6.54417	6.42892	5.99491	5.75178	6.00009	6.41467	5.47583	6.71606	6.54566	6.59766	5.51332	6.19623	5.82989	6.74768	6.91193	7.33888	5.62676	6.28235	6.51359	6.36954	6.76136	7.30345
ENSG00000010932	FMO1	flavin containing monooxygenase 1 [Source:HGNC Symbol;Acc:3769]	1	protein_coding	0.638746	2.566	1.96754	0.655444	3.22077	3.08514	1.92893	2.89389	1.99786	3.29888	2.6059	3.72338	3.50011	1.06753	2.02278	2.92761	2.11458	2.92025	2.79725	2.16374	0.522949	-0.210927	2.60802	3.42884	2.64354	3.02043	1.91434	4.23728	0.236067	2.67407	2.17074	3.49431	2.16374	1.91434	-1.14884	0.611459	1.92974	2.51707	2.17789	-1.08219
ENSG00000011007	TCEB3	transcription elongation factor B (SIII), polypeptide 3 (110kDa, elongin A) [Source:HGNC Symbol;Acc:11620]	1	protein_coding	6.49656	6.60123	6.07098	6.35512	6.1524	6.1718	6.58783	6.24291	6.06831	6.29755	6.24424	6.93309	6.57088	6.05412	6.32224	6.43347	6.40555	6.30272	6.401	6.59666	6.93514	5.73218	5.89911	6.56003	5.8709	5.91644	5.7472	5.93892	6.39686	6.2468	6.23842	6.02182	6.35563	6.50294	6.52824	5.16952	6.86847	7.28958	6.05646	6.68812
ENSG00000011009	LYPLA2	lysophospholipase II [Source:HGNC Symbol;Acc:6738]	1	protein_coding	7.32545	6.31405	5.77667	5.81216	6.14361	6.71721	6.79592	6.11382	5.91422	6.80342	5.78453	6.56213	5.23245	5.46546	5.71021	5.62026	5.90091	5.77984	5.66312	5.59754	7.06794	5.83136	6.18776	6.4753	6.01036	5.93742	5.88628	5.81633	6.13191	5.93742	6.52919	6.02942	6.14952	6.25547	5.5163	5.08123	6.36786	6.16326	5.89441	6.41143
ENSG00000011021	CLCN6	chloride channel, voltage-sensitive 6 [Source:HGNC Symbol;Acc:2024]	1	protein_coding	4.4526	3.46711	4.01107	4.69814	4.17628	3.83997	4.1532	4.23278	3.87264	3.68928	4.13502	4.00503	4.95683	4.81601	5.1403	4.9377	4.45227	4.91574	4.90538	4.98955	4.43279	3.18087	4.26603	4.61827	3.61634	4.36845	3.65546	4.80011	3.92163	4.07866	4.30251	4.66168	4.72887	4.99053	3.47232	3.96546	4.23044	5.38093	4.1574	6.13558
ENSG00000011028	MRC2	mannose receptor, C type 2 [Source:HGNC Symbol;Acc:16875]	17	protein_coding	5.6964	8.19945	7.48821	7.65211	9.12055	6.0023	8.03559	8.75335	6.37621	8.03769	7.66379	6.81334	7.29265	6.55222	6.36415	7.64127	6.86847	7.56414	7.60433	7.354	4.89809	7.22081	8.65158	7.38715	7.6426	8.02724	7.83758	8.06965	6.19778	6.68914	6.43805	7.11618	6.84578	7.64947	4.85991	6.57395	6.77462	9.07174	6.10589	9.0527
ENSG00000011052	NME2	NME/NM23 nucleoside diphosphate kinase 2 [Source:HGNC Symbol;Acc:7850]	17	protein_coding	2.72021	3.70988	1.01604	1.39537	1.97651	3.13436	2.21787	1.41691	1.66586	3.09312	0.694937	3.36867	2.44046	-0.0280087	0.819811	1.82784	2.31935	-1.24157	-0.0205419	1.04611	2.94709	2.88063	2.92025	1.82191	3.31975	1.76608	1.68819	0.433893	2.75007	0.666528	3.31101	3.18496	0.251511	1.87079	2.8098	0.568145	2.20009	2.45575	2.29404	2.78029
ENSG00000011105	TSPAN9	tetraspanin 9 [Source:HGNC Symbol;Acc:21640]	12	protein_coding	5.05147	7.03195	5.70559	4.58086	6.59249	5.38329	5.94858	5.79468	5.30166	6.41467	4.89022	5.04222	6.27396	5.99273	5.58604	5.56709	6.21193	5.43371	5.63089	5.65219	3.88068	6.19856	5.33265	5.47246	4.71425	5.50672	4.86155	5.31156	7.33791	5.9526	4.28379	5.16049	4.97339	7.50407	5.39479	4.93015	5.70064	6.48959	4.07445	6.2627
ENSG00000011114	BTBD7	BTB (POZ) domain containing 7 [Source:HGNC Symbol;Acc:18269]	14	protein_coding	6.07754	4.92924	5.35669	6.18696	5.07732	5.09202	4.85638	5.30422	5.30902	5.29934	5.5892	6.16756	5.56809	6.11382	5.96487	6.11573	5.75033	5.63742	5.8446	5.7514	5.32639	5.04493	5.32865	5.86858	5.42329	5.68201	5.40503	5.36195	4.75529	5.64505	5.42252	5.86556	5.55278	5.53353	5.47712	4.41245	5.11677	6.04208	4.70521	5.1387
ENSG00000011132	APBA3	amyloid beta (A4) precursor protein-binding, family A, member 3 [Source:HGNC Symbol;Acc:580]	19	protein_coding	5.4861	4.65265	4.52222	4.57524	4.45906	4.33114	4.33851	4.3507	4.87952	4.91268	4.73236	4.94073	4.54247	4.38893	4.47486	4.58185	4.22396	4.8823	4.26703	3.9878	4.24829	4.68762	4.31923	4.43086	4.41115	3.78127	3.85931	4.51403	4.73866	4.85104	4.15706	3.98967	4.44109	4.50552	4.39091	4.54791	3.67603	4.49892	5.10059	4.86571
ENSG00000011143	MKS1	Meckel syndrome, type 1 [Source:HGNC Symbol;Acc:7121]	17	protein_coding	3.69029	2.47512	2.88009	4.04175	3.56032	3.76047	4.21225	4.04743	3.49559	3.22529	3.61191	3.60194	3.68456	3.99377	4.30218	4.36878	4.36311	4.01255	3.5872	4.03342	4.21503	3.664	3.9781	3.44438	4.32478	3.77549	3.84907	3.44989	3.67603	2.94545	3.33115	4.34359	3.46845	3.03195	4.43916	3.83834	4.5782	4.09192	3.04781	2.95873
ENSG00000011198	ABHD5	abhydrolase domain containing 5 [Source:HGNC Symbol;Acc:21396]	3	protein_coding	5.46476	4.61442	4.10722	2.37066	3.99486	3.75061	3.79461	4.00882	3.84503	4.12179	3.3499	4.61473	5.17929	3.7025	3.74876	3.89294	3.94262	3.81017	3.94445	4.50325	3.31925	4.38073	4.56423	3.64051	3.99556	4.30765	4.93678	3.44805	3.41703	3.8862	4.18615	3.86334	3.5723	3.46668	4.22466	3.59523	3.8613	2.84465	4.55259	3.6696
ENSG00000011201	KAL1	Kallmann syndrome 1 sequence [Source:HGNC Symbol;Acc:6211]	X	protein_coding	3.64481	2.15246	3.4698	4.7088	4.78793	4.27993	4.90569	4.36177	2.66131	5.02357	4.39485	2.95873	4.55901	4.2062	3.96347	4.47019	4.09809	3.64769	3.54945	3.88965	5.68748	4.01332	4.12222	5.68609	3.27635	4.71391	3.84741	3.95817	4.33347	2.76336	3.53122	3.62056	3.36586	3.54545	4.90383	2.66131	2.98548	4.44666	4.32729	8.16677
ENSG00000011243	AKAP8L	A kinase (PRKA) anchor protein 8-like [Source:HGNC Symbol;Acc:29857]	19	protein_coding	6.06982	5.42462	5.5923	6.18933	5.99782	5.30105	5.60744	5.50866	5.75527	5.62912	5.8011	5.62608	5.38999	5.77321	5.78846	5.58851	5.83243	5.82207	5.73655	5.41345	5.65814	5.37772	5.06168	5.66409	4.95683	5.79536	5.30964	5.80671	5.27421	5.99028	5.71922	5.2931	5.76321	6.693	5.86897	6.91256	5.40536	5.9593	5.78165	5.34759
ENSG00000011258	MBTD1	mbt domain containing 1 [Source:HGNC Symbol;Acc:19866]	17	protein_coding	4.29937	3.81948	4.34219	4.59538	4.52779	4.60215	4.64464	4.57619	4.49285	3.4546	4.87665	4.65684	4.43053	4.79726	4.75563	5.18356	4.97559	4.73046	4.60407	4.43623	4.77456	5.16563	5.80972	4.49285	4.88354	3.57721	3.97278	4.52353	5.22046	4.14746	4.95528	5.28377	4.39583	4.12143	4.54434	5.20507	4.08768	4.69404	4.20443	4.10831
ENSG00000011260	UTP18	UTP18 small subunit (SSU) processome component homolog (yeast) [Source:HGNC Symbol;Acc:24274]	17	protein_coding	4.11385	4.63315	4.60602	4.11315	5.03581	5.37316	5.22988	4.26131	5.04657	4.15811	5.03581	5.65978	3.97387	4.55998	4.27922	4.29554	4.39782	4.18302	4.43947	4.37402	5.17734	5.12093	5.48307	4.31957	4.67643	4.42694	4.08406	4.41771	5.06629	4.24756	5.73423	4.30629	4.7165	4.06205	4.72461	4.80072	4.37112	4.43347	4.62245	4.43019
ENSG00000011275	RNF216	ring finger protein 216 [Source:HGNC Symbol;Acc:21698]	7	protein_coding	5.98769	6.06036	6.09933	7.54179	5.73218	6.23607	5.78813	5.57212	5.70764	6.06452	5.68201	6.20777	5.69125	6.17735	6.07836	5.76028	5.70913	5.816	6.04929	5.90983	5.8346	6.4753	5.12158	5.44468	5.90262	5.94425	6.18503	5.92808	6.22963	5.75069	5.97796	6.56718	6.15516	5.2491	5.22277	5.88741	5.76676	6.27643	6.04645	7.28013
ENSG00000011295	TTC19	tetratricopeptide repeat domain 19 [Source:HGNC Symbol;Acc:26006]	17	protein_coding	4.77999	5.11087	5.34134	4.86251	4.79254	4.66359	4.99673	5.54389	4.92893	5.76359	5.09578	5.86401	4.77234	5.59754	5.84034	5.514	5.83883	5.61339	5.87965	5.61128	4.60761	6.28834	5.61792	5.18453	4.03231	4.90752	5.11348	5.04873	5.02049	5.05345	4.8648	6.06416	5.2481	5.30166	5.30359	5.40503	4.71549	4.97817	4.9377	4.63949
ENSG00000011304	PTBP1	polypyrimidine tract binding protein 1 [Source:HGNC Symbol;Acc:9583]	19	protein_coding	7.85681	7.75769	7.40078	7.93186	7.56548	8.14342	7.69066	7.65358	7.73099	6.91951	7.45573	7.65825	7.10487	7.48297	7.69217	7.56043	7.63451	7.38817	7.48931	7.49911	7.98645	7.69217	8.21744	7.86745	7.77876	7.40741	7.62527	7.69217	8.22734	7.28389	7.84453	7.8002	7.68342	7.6306	8.09591	7.80522	7.67123	8.01484	7.65825	6.99261
ENSG00000011347	SYT7	synaptotagmin VII [Source:HGNC Symbol;Acc:11514]	11	protein_coding	6.0799	6.17257	5.99273	2.20708	4.34083	4.29588	3.74557	5.02887	5.39068	4.45431	5.63808	5.2289	3.43882	5.69026	5.30326	5.09548	5.69842	4.23828	3.93249	4.24383	5.89336	3.24173	5.16597	3.91351	5.02019	5.54462	6.88817	4.45531	2.63167	5.48109	6.22925	3.88965	4.27445	3.15133	7.2128	4.84951	6.51655	4.27374	3.3124	3.58239
ENSG00000011376	LARS2	leucyl-tRNA synthetase 2, mitochondrial [Source:HGNC Symbol;Acc:17095]	3	protein_coding	5.18256	4.36006	4.89611	4.06693	4.5876	4.92104	4.09809	4.48073	4.40537	4.11641	4.50422	4.87952	3.98079	4.49254	4.25619	4.41543	4.38956	4.09052	4.1745	3.65754	4.44502	4.58793	4.53822	4.72752	4.76815	4.95772	4.42239	4.06024	4.81317	4.08115	4.71007	5.08719	4.62568	4.62054	5.89911	5.14574	4.4095	3.84465	4.7368	4.07409
ENSG00000011405	PIK3C2A	phosphatidylinositol-4-phosphate 3-kinase, catalytic subunit type 2 alpha [Source:HGNC Symbol;Acc:8971]	11	protein_coding	6.13389	6.61051	6.63733	6.5336	6.28194	6.18101	6.31832	6.44604	5.83995	6.03932	6.47091	6.61002	6.9086	6.74299	6.8241	6.57447	6.88748	6.59299	6.62314	6.83174	5.74549	6.67799	6.24291	6.30187	6.74938	6.06073	6.08869	6.30017	6.51309	6.53915	6.0139	6.88685	6.57553	5.99818	6.66989	6.12171	6.19332	5.99195	6.25586	6.14046
ENSG00000011422	PLAUR	plasminogen activator, urokinase receptor [Source:HGNC Symbol;Acc:9053]	19	protein_coding	4.17591	6.6582	4.73551	4.93404	6.66277	6.13471	5.38967	5.49462	6.46465	6.98787	5.604	5.16696	3.44112	3.09054	4.47873	2.94434	2.86645	4.48795	3.8248	4.32589	4.01028	5.74822	5.93278	4.81101	5.78132	6.09512	6.0476	4.58793	5.09485	3.85202	5.17668	5.55736	4.20968	4.89842	3.63816	4.00808	5.50391	4.14509	6.18219	6.83427
ENSG00000011426	ANLN	anillin, actin binding protein [Source:HGNC Symbol;Acc:14082]	7	protein_coding	5.84669	6.75717	6.42212	7.18458	6.2035	6.77829	5.64604	5.88251	5.79932	5.25919	6.82477	7.05842	1.35778	4.48439	3.33947	2.37493	1.96754	2.35611	0.053835	2.74643	6.6704	6.94433	7.91118	5.8518	5.56403	6.43074	5.87459	3.47429	6.70069	5.00571	7.54298	6.63408	5.02673	5.58471	6.13471	5.96367	6.13884	6.16711	5.73822	7.22709
ENSG00000011451	WIZ	widely interspaced zinc finger motifs [Source:HGNC Symbol;Acc:30917]	19	protein_coding	6.21538	6.1094	6.20726	6.68758	5.91051	5.46333	6.04497	6.22542	5.89404	5.92808	5.98196	5.97194	5.99782	6.04497	5.87184	5.93492	5.89404	5.45265	5.77248	5.97415	6.36145	5.21798	5.58014	5.62197	6.13191	5.65814	6.39154	5.58471	5.73029	6.17906	6.7098	5.73655	5.23569	5.9077	5.78744	7.29737	6.10469	6.38158	5.47211	5.75639
ENSG00000011454	RABGAP1	RAB GTPase activating protein 1 [Source:HGNC Symbol;Acc:17155]	9	protein_coding	5.68609	5.30066	5.83567	5.48141	5.89945	5.77591	6.35124	5.37088	5.86438	5.89476	6.09624	6.20646	6.0127	6.04845	6.21995	6.19332	5.97298	6.1645	6.1568	6.1146	6.18139	6.22155	6.22453	5.95594	5.63674	6.72344	6.17337	5.96864	6.14438	5.46739	6.07601	6.42892	5.91017	6.10089	6.23683	5.91937	5.79828	6.46415	5.45658	5.83315
ENSG00000011465	DCN	decorin [Source:HGNC Symbol;Acc:2705]	12	protein_coding	7.12867	8.11985	8.9747	7.60745	10.8797	8.31245	10.2916	10.2785	8.56366	10.332	9.98305	8.83916	10.7686	8.55065	9.06219	10.332	9.94378	10.4631	11.4446	10.1789	5.1338	6.32833	7.38596	9.98305	9.10081	9.52547	9.00627	10.3597	6.26585	9.80736	7.25412	9.3015	9.17641	9.24564	3.32549	7.88363	9.66206	8.59678	8.63076	11.0607
ENSG00000011478	QPCTL	glutaminyl-peptide cyclotransferase-like [Source:HGNC Symbol;Acc:25952]	19	protein_coding	4.01028	5.82103	3.99114	4.8619	3.9758	3.93174	3.40782	3.88146	3.93913	4.10254	3.34464	3.47128	3.14605	3.80157	3.32321	2.88009	4.27478	2.85661	3.51361	3.00014	2.91848	3.27686	3.78879	3.40121	3.91726	2.55523	3.79417	2.91302	4.10722	3.87219	3.02301	3.99221	2.41551	3.60698	4.4064	3.65113	4.98016	3.44066	3.63296	5.03647
ENSG00000011485	PPP5C	protein phosphatase 5, catalytic subunit [Source:HGNC Symbol;Acc:9322]	19	protein_coding	5.72926	5.49831	4.81412	6.07212	5.71441	5.32932	5.06468	5.40217	5.49896	5.34472	4.78603	5.67682	5.17371	4.76983	4.96694	5.09516	5.21798	4.82391	4.99543	5.18288	4.7419	5.0987	5.6721	5.29697	5.65814	4.90964	4.85169	4.87857	5.99114	5.22144	5.01692	6.02785	5.05211	5.26451	5.89088	5.70987	5.47747	6.01769	5.61726	5.26857
ENSG00000011523	CEP68	centrosomal protein 68kDa [Source:HGNC Symbol;Acc:29076]	2	protein_coding	5.38428	4.17663	5.52809	5.75281	5.75316	3.83713	4.73334	5.74926	4.86155	4.18269	4.82325	5.62953	6.78305	6.34289	6.22882	6.34289	5.96723	6.56765	6.32876	6.1568	4.91356	4.42954	4.71103	5.29116	5.15634	4.70749	4.91034	5.78384	5.38428	4.77741	5.08719	4.68891	5.66274	5.40601	5.6274	5.19166	5.20315	5.2983	4.4167	4.79285
ENSG00000011566	MAP4K3	mitogen-activated protein kinase kinase kinase kinase 3 [Source:HGNC Symbol;Acc:6865]	2	protein_coding	5.66055	4.99053	5.20474	5.25635	5.78093	4.72061	5.25013	4.85547	4.84951	5.04322	4.85638	5.38292	5.47077	5.47515	5.26079	4.97559	5.45298	4.84586	5.33868	5.17307	5.46237	5.64079	4.77365	4.83094	5.03215	5.49557	4.9679	4.84361	4.97051	5.20641	5.36125	4.85357	4.6841	5.40154	6.05826	5.53755	5.76285	4.25823	4.65495	5.44505
ENSG00000011590	ZBTB32	zinc finger and BTB domain containing 32 [Source:HGNC Symbol;Acc:16763]	19	protein_coding	-0.142496	-0.951152	-2.71915	0.0166287	-0.722207	1.31789	-1.25113	-2.79053	1.05314	-0.655136	0.853987	0.616956	-2.91602	-4.01423	-1.57895	-1.84676	-2.2428	-0.733246	-0.266083	-1.96951	-1.66391	0.657254	-1.58616	-2.35918	-0.37739	-2.43451	-1.81583	-0.485715	-0.561869	-0.880802	0.93907	-1.4384	1.4238	-1.25113	-1.09207	-2.57298	-2.15136	-3.37633	2.27085	-0.3337
ENSG00000011600	TYROBP	TYRO protein tyrosine kinase binding protein [Source:HGNC Symbol;Acc:12449]	19	protein_coding	4.92072	5.80317	4.88864	5.20641	6.82225	7.05767	6.55329	5.876	6.5306	6.27437	6.93997	6.15083	5.14289	3.28545	5.14387	5.45298	4.07513	5.88172	5.02825	4.65332	4.82893	5.90481	4.84167	6.5336	6.27943	5.62094	5.60744	5.6424	4.95683	5.23535	5.49362	5.86258	5.40341	5.25431	3.3096	4.52909	5.09578	3.92163	7.50641	6.07836
ENSG00000011638	TMEM159	transmembrane protein 159 [Source:HGNC Symbol;Acc:30136]	16	protein_coding	5.11286	6.29365	5.9734	3.33554	5.41345	5.14796	4.7771	5.13349	5.17965	6.37926	4.86117	5.0583	5.94858	5.88741	5.59331	5.56607	5.05147	5.48239	6.09403	5.75599	4.8341	5.17634	4.62343	5.11546	4.04175	5.14128	5.90803	5.21984	5.07213	5.51332	4.39815	5.04456	4.70521	5.45766	2.82635	4.74832	5.22177	3.62183	4.62408	4.36984
ENSG00000011677	GABRA3	gamma-aminobutyric acid (GABA) A receptor, alpha 3 [Source:HGNC Symbol;Acc:4077]	X	protein_coding	-2.42227	2.09397	0.242712	0.480555	2.07383	3.75516	0.345101	1.45948	-3.37633	0.230965	-1.36261	-2.51426	-4.09933	-2.13433	-5.11295	-3.09226	-3.2274	-4.6566	-4.57153	-3.59201	-3.3543	0.793587	-1.01418	0.404906	0.958526	3.09791	0.749398	-2.40138	-3.777	-2.4565	-2.86803	-2.98207	-3.777	-0.0229565	7.73099	-3.88353	2.24574	2.05294	-0.711151	1.50462
ENSG00000012048	BRCA1	breast cancer 1, early onset [Source:HGNC Symbol;Acc:1100]	17	protein_coding	1.06324	3.83195	3.97158	4.14543	3.92429	5.22046	4.80231	3.27833	3.22827	2.55063	3.72178	4.89779	3.19958	3.21925	2.74578	3.1216	3.01925	3.06677	1.65284	2.60802	5.23809	3.74029	5.39196	4.43547	2.97467	4.04743	4.02856	3.47601	5.77984	3.21771	5.29085	5.69881	3.36771	3.61768	3.86334	1.15394	4.55062	5.02855	4.09999	4.06548
ENSG00000012061	ERCC1	excision repair cross-complementing rodent repair deficiency, complementation group 1 (includes overlapping antisense sequence) [Source:HGNC Symbol;Acc:3433]	19	protein_coding	5.52944	5.80243	4.46064	5.38492	5.46063	4.77523	4.79726	5.43307	4.89246	4.85698	5.11837	5.66963	5.29241	5.19395	5.49966	5.26114	5.57907	4.76983	5.29934	5.47712	4.20443	4.79757	5.48176	4.74862	5.57317	4.25415	4.83881	4.78091	5.69059	4.87983	4.89246	5.7359	4.87445	4.56976	4.70847	4.80321	4.8485	4.55421	4.65877	5.47178
ENSG00000012124	CD22	CD22 molecule [Source:HGNC Symbol;Acc:1643]	19	protein_coding	0.279211	1.24734	0.739498	1.28551	0.93907	2.68812	1.88902	2.93875	2.08982	1.13379	4.85516	1.68714	1.16603	-0.741869	3.12529	4.2014	2.12774	4.13869	3.16116	1.41348	0.759591	0.45626	-0.21421	2.53253	2.63042	1.68528	0.310652	7.03049	-0.320671	3.69074	1.40129	0.358433	6.6473	2.39698	0.168485	0.942163	-0.841594	-0.408006	4.05805	0.892241
ENSG00000012171	SEMA3B	sema domain, immunoglobulin domain (Ig), short basic domain, secreted, (semaphorin) 3B [Source:HGNC Symbol;Acc:10724]	3	processed_transcript	2.69353	2.33947	3.57501	6.82225	4.08803	2.5177	2.06116	2.47241	3.07561	2.36923	3.47647	2.80852	6.2166	4.26932	5.49396	4.12143	7.30251	4.11607	5.27141	5.41576	0.345101	3.00923	5.89441	3.11889	6.27563	4.38989	5.86659	3.28905	5.84602	3.07343	1.94441	2.96103	2.71319	2.28745	4.74991	2.22109	2.76566	2.98986	0.673899	4.23556
ENSG00000012174	MBTPS2	membrane-bound transcription factor peptidase, site 2 [Source:HGNC Symbol;Acc:15455]	X	protein_coding	4.33017	4.95893	4.90901	5.20315	4.3804	5.515	4.92355	4.56326	4.80168	4.8713	4.45731	4.80042	4.72752	5.03461	4.76272	4.56976	4.84167	4.37215	4.83912	4.73489	4.358	4.52485	5.12093	4.36275	5.32248	4.88987	5.06499	4.36311	3.73066	4.7049	4.55998	4.54464	4.65169	4.76035	5.34472	5.48239	4.65877	4.52909	4.72391	4.86732
ENSG00000012211	PRICKLE3	prickle homolog 3 (Drosophila) [Source:HGNC Symbol;Acc:6645]	X	protein_coding	3.59312	4.31211	5.81073	3.02927	3.27164	4.36484	3.56078	3.37578	4.00209	4.19827	2.91143	2.92396	3.72662	4.89479	3.71417	3.59396	3.50905	3.32503	3.48662	2.93875	5.11742	5.29054	2.53665	3.3987	3.24272	3.14492	4.07513	3.1145	3.34517	4.03664	3.50447	3.93567	3.60511	3.40918	4.41052	4.46953	4.27789	3.39501	4.22226	3.39116
ENSG00000012223	LTF	lactotransferrin [Source:HGNC Symbol;Acc:6720]	3	protein_coding	-3.05397	6.9955	9.87813	2.47303	0.175379	8.88006	9.89651	9.03394	8.03769	9.36586	4.48073	9.84221	6.1998	9.0386	10.2276	9.06219	6.19661	10.3183	10.2785	9.54606	5.72828	6.97709	3.80043	8.69064	10.9788	9.24018	7.6453	8.69786	9.80736	11.3615	-0.871941	0.114479	9.93417	7.40741	1.56548	7.44794	-1.05826	-2.98207	11.0896	-1.82335
ENSG00000012232	EXTL3	exostosin-like glycosyltransferase 3 [Source:HGNC Symbol;Acc:3518]	8	protein_coding	5.6731	6.16711	6.29099	6.55428	5.1058	4.61021	5.20705	5.6707	5.35605	5.14258	5.43307	6.77275	5.71375	6.19856	5.72062	5.88703	5.43371	5.29863	5.50224	5.605	5.77285	4.66808	6.34594	4.93184	5.20804	5.02019	6.87765	4.87571	5.45658	5.89476	5.60812	6.18101	5.80037	4.83912	7.02531	5.66624	4.94851	7.21912	5.45386	5.45934
ENSG00000012660	ELOVL5	ELOVL fatty acid elongase 5 [Source:HGNC Symbol;Acc:21308]	6	protein_coding	5.23054	6.12527	6.39927	5.87459	5.34573	6.69021	6.93584	5.87737	5.47646	6.83616	6.41736	5.86438	7.88544	6.52344	6.18581	7.04031	9.45919	6.74408	6.86026	7.30936	5.18422	5.6578	5.23638	8.43913	5.86258	5.62266	5.77739	6.23041	5.5923	9.06219	5.28771	4.32551	6.02273	6.41371	6.06538	5.87892	5.9135	5.73218	5.51465	6.201
ENSG00000012779	ALOX5	arachidonate 5-lipoxygenase [Source:HGNC Symbol;Acc:435]	10	protein_coding	3.52365	3.83909	3.2737	2.33031	4.46919	4.40277	4.6591	3.68366	5.35047	4.0887	4.92984	3.42364	3.57132	2.96907	4.54565	3.66618	3.42132	4.45127	4.66521	4.28029	3.41519	5.39789	3.61591	4.39361	4.16897	3.80507	4.46283	5.33034	3.92391	3.31975	3.42835	4.01827	5.23504	4.62568	1.99618	3.3183	3.21821	1.77168	5.99598	4.14048
ENSG00000012822	CALCOCO1	calcium binding and coiled-coil domain 1 [Source:HGNC Symbol;Acc:29306]	12	protein_coding	6.17143	4.44536	5.81216	5.56328	5.97228	5.1542	6.22077	6.24047	5.40631	5.4704	6.33895	5.34432	7.36709	6.63075	7.22081	7.28191	7.20456	7.42016	7.10883	7.33691	5.35047	5.07505	5.30551	6.83944	5.28805	6.54616	6.1584	7.39472	5.25175	6.27059	5.27714	6.30822	6.97344	7.43622	5.44537	6.03779	6.27017	6.49521	6.50048	5.70233
ENSG00000012963	UBR7	ubiquitin protein ligase E3 component n-recognin 7 (putative) [Source:HGNC Symbol;Acc:20344]	14	protein_coding	6.43486	4.6456	4.91724	5.20411	4.9377	5.2786	4.85991	4.82296	5.1577	4.86155	5.32218	5.79784	5.32315	5.22144	5.26857	5.57245	5.514	5.20156	5.56542	5.10195	4.68925	4.28916	5.57072	5.61198	5.64008	5.11257	4.54308	4.91977	4.46397	4.99835	5.33165	5.76146	4.9817	4.9508	5.47006	4.17178	4.79382	4.73773	4.6739	4.41607
ENSG00000012983	MAP4K5	mitogen-activated protein kinase kinase kinase kinase 5 [Source:HGNC Symbol;Acc:6867]	14	protein_coding	5.57006	4.79153	4.87221	6.66329	6.12283	4.70975	4.92011	5.01953	5.05345	5.37316	4.90068	5.06814	4.85417	4.85104	5.26791	4.89711	5.01077	4.99023	4.90629	5.11708	4.99766	5.09292	5.37516	5.36632	5.5432	5.93932	4.96179	5.16079	4.53752	4.66197	5.36632	5.3774	4.95385	5.35833	4.68224	5.03078	5.6624	5.40185	4.66776	4.86021
ENSG00000013016	EHD3	EH-domain containing 3 [Source:HGNC Symbol;Acc:3244]	2	protein_coding	5.60677	5.95629	3.80349	3.63164	4.85638	3.30279	4.37112	4.80683	3.18297	4.30117	3.45187	3.34413	3.19364	4.30559	5.05147	4.40135	4.33381	4.27202	4.42437	4.31211	4.34532	2.76507	3.92763	3.50623	5.06629	4.64464	4.96853	4.8648	3.62947	3.79461	2.56538	3.36819	5.05113	3.82849	3.96546	3.75516	4.5889	4.12512	3.87136	5.14289
ENSG00000013275	PSMC4	proteasome (prosome, macropain) 26S subunit, ATPase, 4 [Source:HGNC Symbol;Acc:9551]	19	protein_coding	6.4861	7.48297	6.03702	6.35834	6.46522	6.60385	5.81143	6.15637	6.89173	6.46912	6.28414	6.30146	6.12608	5.7359	6.01724	5.79747	5.89157	5.80211	5.89055	5.98233	5.6974	6.53963	6.62552	6.07491	6.60223	5.93001	6.23239	5.75248	6.62707	6.63517	6.10668	6.18619	6.16629	5.91085	6.5287	6.67749	6.64476	5.92854	7.0745	7.20016
ENSG00000013288	MAN2B2	mannosidase, alpha, class 2B, member 2 [Source:HGNC Symbol;Acc:29623]	4	protein_coding	6.60123	5.57317	5.15634	4.48892	6.01155	6.08832	5.79639	5.43371	5.17571	6.70579	5.5739	4.90163	5.93492	5.58886	5.58851	5.70336	6.24465	5.90192	6.22039	5.98088	4.70271	4.59148	4.80683	5.9269	5.32156	5.81795	5.36993	5.92155	4.6739	5.47814	5.18976	5.80712	5.71096	5.28805	6.08027	5.22957	5.31378	4.49285	6.25927	5.73622
ENSG00000013297	CLDN11	claudin 11 [Source:HGNC Symbol;Acc:8514]	3	protein_coding	1.22688	2.43917	4.0406	5.31187	-0.119316	1.20824	2.0688	4.18202	4.85229	2.03822	3.46158	2.79236	5.1374	5.67716	5.90837	6.06945	5.25175	6.0537	6.17862	4.54308	3.20113	2.26702	1.47468	3.65841	6.50294	1.46528	5.7575	4.41803	1.11999	4.64495	0.883942	0.657254	3.5232	3.3096	4.83943	3.11839	0.215668	0.726683	2.61817	1.12383
ENSG00000013306	SLC25A39	solute carrier family 25, member 39 [Source:HGNC Symbol;Acc:24279]	17	protein_coding	6.36744	6.59567	6.7923	5.75852	6.72457	6.85533	7.06306	6.90922	6.72397	6.33345	7.37982	7.23454	6.02273	6.3118	6.258	6.25061	6.82538	6.09548	6.09439	6.18543	7.65211	7.10172	6.68965	7.05074	6.47291	6.85533	6.62387	6.49113	7.48067	6.69518	8.02309	7.10652	6.60846	6.47974	6.98382	7.52397	6.56985	6.5209	7.02385	6.62387
ENSG00000013364	MVP	major vault protein [Source:HGNC Symbol;Acc:7531]	16	protein_coding	5.53449	5.68136	6.59567	6.02573	7.08074	7.6141	7.18117	7.05235	7.23454	8.01073	6.91394	6.69685	6.98251	6.48062	6.78702	6.86144	6.8121	7.6002	7.02609	6.93997	4.71808	7.03195	5.54427	7.26761	6.60021	7.71404	7.26273	7.36815	5.53217	6.58518	5.69474	6.47336	7.27623	6.81087	7.1555	6.20872	7.14542	5.45624	7.55546	6.92826
ENSG00000013374	NUB1	negative regulator of ubiquitin-like proteins 1 [Source:HGNC Symbol;Acc:17623]	7	protein_coding	4.93678	6.12443	5.68609	5.56576	5.72134	6.16244	5.99422	5.83995	6.22235	6.46319	6.71606	6.58298	5.8852	5.83995	5.87287	5.85463	5.76562	6.19253	5.92407	5.80935	5.47211	6.31702	4.59148	6.18933	6.05913	5.51431	5.76718	6.4714	6.22667	5.6397	6.48959	5.68785	6.21499	6.16584	5.21058	5.78453	5.15481	4.97082	6.80525	5.5257
ENSG00000013375	PGM3	phosphoglucomutase 3 [Source:HGNC Symbol;Acc:8907]	6	protein_coding	6.34642	6.49707	5.40439	7.05	6.24337	5.509	6.18933	6.13269	6.05062	6.58879	5.65327	5.72959	5.73099	4.96462	5.20641	5.45072	5.49462	5.27263	5.23776	5.18453	5.29206	5.59331	6.4861	5.25982	5.6454	6.39467	6.3487	5.63402	5.90663	5.62985	5.683	6.21995	5.64472	6.11135	6.96608	5.94494	6.42259	6.35609	5.94285	6.28456
ENSG00000013392	RWDD2A	RWD domain containing 2A [Source:HGNC Symbol;Acc:21385]	6	protein_coding	4.15491	4.08666	3.42646	4.11778	3.86293	3.17219	3.66218	4.1361	3.36308	3.48245	3.09255	3.46755	4.04283	3.06084	3.07884	3.14492	3.81384	3.01091	3.10745	3.15337	3.10473	3.18141	3.59179	2.89733	3.6692	4.09052	3.65414	3.35774	3.59785	3.49651	3.08571	4.16033	3.66011	4.26021	4.94073	3.3517	4.04097	3.71111	4.24936	3.15857
ENSG00000013441	CLK1	CDC-like kinase 1 [Source:HGNC Symbol;Acc:2068]	2	protein_coding	5.98016	5.33297	5.3254	6.98719	6.21821	5.07798	6.10547	6.41143	5.68926	5.6492	6.14477	5.46771	6.41143	6.48106	7.01899	7.43181	6.92376	7.71864	6.64355	6.92509	5.4103	6.14161	6.1094	6.95089	5.38802	5.70476	5.52636	7.40532	5.14859	6.50048	5.38223	5.66169	7.22183	6.97776	5.53819	6.16798	5.6492	7.2733	6.55955	5.32932
ENSG00000013503	POLR3B	polymerase (RNA) III (DNA directed) polypeptide B [Source:HGNC Symbol;Acc:30348]	12	protein_coding	3.87513	4.54729	3.22874	4.06284	3.4587	4.04603	3.42315	2.92287	3.28443	3.9758	3.63207	3.20624	2.91686	3.20672	3.18594	3.33115	3.29187	3.1145	3.12062	2.90861	4.66681	3.59136	2.87954	3.82965	3.77297	3.78879	4.01107	3.06623	4.49019	3.49918	4.63185	3.66011	3.50352	3.89043	4.24451	3.76459	3.55529	3.47472	3.70061	3.68743
ENSG00000013523	ANGEL1	angel homolog 1 (Drosophila) [Source:HGNC Symbol;Acc:19961]	14	protein_coding	4.99176	4.73966	4.60988	4.15388	4.48569	4.98048	4.31923	4.91512	5.59127	4.30151	4.81443	4.90009	4.78061	4.72358	5.16079	5.29433	5.04187	5.49627	4.97217	5.05951	5.11546	4.24613	4.2962	5.16402	4.99766	5.11448	4.35871	4.97559	3.64643	4.99449	4.71169	4.63346	4.96623	5.39479	5.72167	4.66585	3.92575	5.13064	5.20379	4.4643
ENSG00000013561	RNF14	ring finger protein 14 [Source:HGNC Symbol;Acc:10058]	5	protein_coding	4.81601	5.49362	5.33429	4.59054	5.21608	5.49362	5.27955	5.20189	5.2708	6.45985	5.54055	5.87633	6.48426	5.84843	5.58505	5.66015	6.06189	5.62094	5.82315	5.71479	4.62086	5.53755	4.66934	5.20903	4.94365	5.83995	5.058	5.3986	4.78187	5.64675	5.08093	5.38967	5.16501	5.058	4.77298	5.02257	5.40341	5.08904	5.31408	5.32898
ENSG00000013563	DNASE1L1	deoxyribonuclease I-like 1 [Source:HGNC Symbol;Acc:2957]	X	protein_coding	4.71103	4.76068	5.76321	3.63553	4.64495	5.01493	5.30166	4.41149	4.56874	5.04945	4.93502	4.83881	5.10897	5.18878	4.61827	4.36378	4.77833	4.57956	4.4619	4.85791	4.01827	4.92674	4.16757	4.72427	4.2314	4.44242	5.22144	4.71742	3.50623	5.33397	4.33615	4.69628	4.79412	4.57369	5.28988	3.45284	4.5206	4.00361	4.87445	5.66474
ENSG00000013573	DDX11	DEAD/H (Asp-Glu-Ala-Asp/His) box helicase 11 [Source:HGNC Symbol;Acc:2736]	12	protein_coding	5.9367	4.85516	5.15543	6.30312	5.83813	4.72493	3.92354	5.67143	5.72464	3.87587	4.73582	4.9892	4.49443	4.78031	4.87892	4.21296	3.08097	4.21758	2.88942	4.8928	5.59685	6.39238	5.83067	5.43737	4.37471	4.1872	4.99206	5.93636	7.36129	5.02455	5.70476	5.33868	5.17078	5.77211	5.96367	6.38712	6.71606	5.89193	5.21253	4.30385
ENSG00000013583	HEBP1	heme binding protein 1 [Source:HGNC Symbol;Acc:17176]	12	protein_coding	5.16531	6.07411	5.89299	3.11732	5.50095	4.77365	4.60665	4.9374	5.17242	5.67507	4.90811	4.5876	6.02182	6.0476	5.14163	5.52708	5.69026	5.10396	5.37024	5.12032	5.00817	5.42789	5.27421	5.73688	4.12657	4.84106	4.45324	4.92643	5.07636	5.50803	4.96239	5.4993	4.79879	4.17178	4.39423	4.55612	4.98294	3.60108	4.84011	5.54563
ENSG00000013588	GPRC5A	G protein-coupled receptor, family C, group 5, member A [Source:HGNC Symbol;Acc:9836]	12	protein_coding	7.84628	7.44057	8.30445	4.66968	5.65327	2.11372	6.84953	6.54155	4.48569	9.19733	8.55065	6.77405	5.91162	7.84802	6.60846	5.819	6.88107	6.48379	6.50001	6.90797	5.71788	7.16829	6.36017	8.6035	5.07505	7.86924	6.66659	6.23318	4.60342	8.31512	7.95103	4.60342	5.78638	7.5915	5.0583	7.26671	8.46308	4.90447	3.27783	3.61634
ENSG00000013619	MAMLD1	mastermind-like domain containing 1 [Source:HGNC Symbol;Acc:2568]	X	protein_coding	4.32478	1.28175	2.36855	4.33884	1.30002	2.13947	2.15246	4.39749	2.42786	3.46711	0.860428	0.270371	3.96389	1.70126	2.18684	1.81841	2.21642	2.93178	2.53736	2.89622	3.39916	2.23994	6.16411	2.07607	4.4289	1.95329	3.76947	3.49874	3.59041	1.92568	2.38719	4.17213	2.55325	3.59221	1.13647	3.27734	4.66808	2.50062	2.68873	2.39554
ENSG00000013725	CD6	CD6 molecule [Source:HGNC Symbol;Acc:1691]	11	protein_coding	3.72098	2.71655	1.9273	1.34306	2.47241	4.53787	4.08299	4.40704	5.33297	3.1216	5.36538	4.22904	1.44139	1.50771	2.06346	3.3987	2.38872	5.16501	2.76747	2.83829	2.0476	3.65929	2.20331	3.95817	3.82224	1.91434	2.83011	4.93439	2.54107	2.28518	3.78677	3.22529	5.69298	3.30911	0.836407	2.77971	1.94276	0.763029	5.48545	3.26113
ENSG00000013810	TACC3	transforming, acidic coiled-coil containing protein 3 [Source:HGNC Symbol;Acc:11524]	4	protein_coding	6.72947	4.69497	4.87097	6.23569	4.61891	6.53014	4.81317	4.77234	5.41998	4.27579	5.44239	4.78954	3.00975	3.10096	3.51317	3.51546	2.99483	3.98007	2.44589	2.66569	6.44037	5.03043	6.81976	4.73267	4.73334	4.81601	5.32506	4.90197	6.12801	4.15706	6.11263	5.79029	5.06107	4.1796	6.74299	6.05062	4.45395	6.05294	5.89336	6.24591
ENSG00000014123	UFL1	UFM1-specific ligase 1 [Source:HGNC Symbol;Acc:23039]	6	protein_coding	5.6482	6.76248	6.10977	5.78054	6.31915	6.44227	6.54616	6.42673	6.63408	5.97228	6.29099	5.52745	6.33215	6.19741	6.59567	6.22453	7.11869	6.03589	6.29617	6.17143	5.5518	5.87184	6.20872	6.20685	5.9439	6.58987	6.54155	6.38712	6.21074	6.11093	5.95041	7.21076	6.51203	6.56003	7.14094	6.27563	6.58149	6.32603	6.19253	6.50346
ENSG00000014138	POLA2	polymerase (DNA directed), alpha 2, accessory subunit [Source:HGNC Symbol;Acc:30073]	11	protein_coding	4.626	3.9291	4.31618	4.52715	3.42943	4.46034	4.04097	4.48892	4.5183	3.90538	4.42074	4.73236	3.18141	4.01184	3.52059	3.04229	3.3369	3.68499	3.21221	3.14984	4.80974	3.82437	4.54341	3.79545	4.46497	3.65587	4.16829	3.34106	4.78509	3.725	4.50422	4.68539	3.9201	3.61815	5.55953	5.19466	4.16795	4.69915	4.35832	3.9395
ENSG00000014164	ZC3H3	zinc finger CCCH-type containing 3 [Source:HGNC Symbol;Acc:28972]	8	protein_coding	5.81248	4.82071	4.23521	4.53369	4.23213	5.48744	4.17628	4.03159	4.73613	4.48372	3.94262	5.42921	4.00992	4.03628	3.88218	4.07445	3.9651	3.70495	3.91084	3.97158	4.74064	4.85326	4.354	4.13648	4.8182	3.24073	4.76815	3.86544	4.29487	4.67612	5.81039	4.37279	4.34359	3.43336	5.07798	4.48337	4.23695	5.23149	4.64078	4.44242
ENSG00000014216	CAPN1	calpain 1, (mu/I) large subunit [Source:HGNC Symbol;Acc:1476]	11	protein_coding	7.38923	8.0288	8.36434	6.31007	7.1335	8.21006	7.83585	8.05889	8.06533	8.61366	8.42733	8.7346	6.84388	8.1715	7.72017	7.47954	7.75937	7.5124	7.75458	7.2227	6.94502	7.83413	7.25903	7.19851	7.27242	7.95103	7.66524	7.38189	6.21193	7.63993	7.7435	7.69889	7.88908	6.98583	8.29388	8.15972	7.60433	6.43213	7.9627	7.00089
ENSG00000014257	ACPP	acid phosphatase, prostate [Source:HGNC Symbol;Acc:125]	3	protein_coding	0.371032	-0.528269	-2.20601	-0.336624	-0.635401	2.16134	3.04175	0.104501	-1.45651	1.44139	0.852428	0.492	0.442998	0.0854425	0.392776	-0.113008	-0.110493	0.484412	1.01457	-1.00507	0.29009	-1.42199	0.210777	0.564254	0.895364	1.43288	2.01153	-0.982138	1.72049	2.90635	-0.858207	-0.455057	1.34173	1.32741	2.32533	-1.50867	-0.479349	0.864192	-0.153662	2.249
ENSG00000014641	MDH1	malate dehydrogenase 1, NAD (soluble) [Source:HGNC Symbol;Acc:6970]	2	protein_coding	7.70644	6.8145	6.48106	6.54305	6.86457	6.75054	7.0927	7.06234	6.95024	6.77405	7.31142	6.84008	8.2199	6.33853	6.33514	6.28503	6.4758	6.31135	6.35739	6.97344	6.90922	7.14866	6.83817	6.61883	7.02762	7.04325	6.72733	6.52297	6.8578	6.90466	6.83616	7.38596	6.61207	6.64302	6.83877	6.32085	7.13105	5.97495	6.49472	7.03949
ENSG00000014824	SLC30A9	solute carrier family 30 (zinc transporter), member 9 [Source:HGNC Symbol;Acc:1329]	4	protein_coding	6.10589	5.22828	5.41384	5.54023	5.17465	5.9432	4.75465	5.92299	5.76599	5.73721	5.40962	4.74799	5.11148	5.65327	5.19504	5.18256	5.55375	4.74346	5.54636	5.14193	5.60432	5.14225	6.15516	4.83314	6.01615	5.3417	5.22112	5.19295	5.96864	5.16501	5.43737	6.22542	5.12775	4.80745	5.8446	5.89157	4.64753	4.76068	5.0566	5.36471
ENSG00000014914	MTMR11	myotubularin related protein 11 [Source:HGNC Symbol;Acc:24307]	1	protein_coding	2.30847	4.56874	5.44771	3.73414	5.89983	4.308	3.60422	4.48956	5.515	4.39517	4.06654	4.11421	3.52275	5.00916	4.73613	4.89419	4.08333	5.08686	4.31337	4.16328	2.71539	3.93726	4.70815	4.43883	3.85024	3.80311	5.77285	4.62505	5.09609	3.07394	6.42806	3.39965	4.43215	4.9374	2.1569	5.69881	4.09617	4.17833	3.41013	2.82175
ENSG00000014919	COX15	cytochrome c oxidase assembly homolog 15 (yeast) [Source:HGNC Symbol;Acc:2263]	10	protein_coding	4.61956	5.34759	5.11708	4.55133	5.76754	5.44832	4.95712	5.11148	4.94788	5.77739	5.37839	4.84456	6.08225	5.49799	5.53585	5.80144	5.56937	5.57673	5.47446	5.41226	4.99543	5.0566	4.6456	5.29241	4.68319	4.73205	5.29502	5.25792	5.07336	5.84347	5.52338	5.47712	5.41637	5.37056	5.33429	4.91297	5.46099	4.70815	5.00661	5.00225
ENSG00000015133	CCDC88C	coiled-coil domain containing 88C [Source:HGNC Symbol;Acc:19967]	14	protein_coding	6.42715	5.8518	4.73712	5.00353	5.30262	5.60465	4.71039	5.81829	6.12645	5.51971	6.13191	6.47091	4.59507	5.70591	5.21285	5.19599	5.16917	5.73062	4.93976	4.86415	6.78018	5.92442	4.679	4.93649	5.70517	4.84233	4.98109	5.93855	4.99703	6.06345	6.76082	5.48141	6.48561	5.34635	5.53787	5.29765	5.02327	5.74549	6.50439	3.96739
ENSG00000015153	YAF2	YY1 associated factor 2 [Source:HGNC Symbol;Acc:17363]	12	protein_coding	4.37471	3.86544	2.93517	3.49286	3.63637	3.44713	3.89535	3.35422	3.75437	3.44805	3.52673	3.38776	3.69277	3.44066	3.9578	3.19651	3.784	3.68876	3.54988	3.79149	3.35374	3.23913	3.82731	3.31582	3.63384	3.48156	2.75561	3.62142	3.75884	3.36586	3.13228	3.42315	3.50011	3.95248	3.63117	3.9093	3.7395	3.50105	3.89848	3.68702
ENSG00000015171	ZMYND11	zinc finger, MYND-type containing 11 [Source:HGNC Symbol;Acc:16966]	10	protein_coding	5.42921	5.9548	6.09624	5.58083	6.56096	6.40336	6.45199	6.30187	6.6743	5.58851	6.37495	6.09819	6.26356	6.64238	6.23923	6.44276	6.45153	6.02	6.18933	6.17985	7.48701	5.81182	6.88685	6.34412	6.74071	6.84189	6.39066	6.25632	5.81866	6.24766	6.27017	6.25302	6.18853	6.37043	5.83136	5.89583	6.28543	6.39927	5.49328	6.19501
ENSG00000015285	WAS	Wiskott-Aldrich syndrome [Source:HGNC Symbol;Acc:12731]	X	protein_coding	2.14785	2.4197	2.31935	2.26555	2.85471	3.79662	3.23913	3.71456	3.98928	3.03415	4.16328	3.3517	2.17859	0.49959	2.37724	2.96458	1.33234	3.54545	2.56301	2.42915	3.14984	3.77799	2.41272	3.83002	3.72098	2.4839	3.21469	4.91788	3.05982	3.12745	3.01254	3.38598	5.37284	3.18297	1.72338	2.72513	2.93686	2.52992	5.59369	3.71768
ENSG00000015413	DPEP1	dipeptidase 1 (renal) [Source:HGNC Symbol;Acc:3002]	16	protein_coding	0.175379	-2.61107	-2.86803	1.06613	-2.537	3.04385	-0.308454	-0.565554	2.78508	-3.29034	0.697009	-1.20058	-1.07357	-3.1487	-2.17046	-3.29034	-2.71915	-1.18023	-2.65057	-1.46728	-0.647829	-0.692532	-1.44525	-2.74546	0.112177	-2.2428	-1.64436	1.77364	0.642193	-0.435182	-0.281754	-1.17542	-1.90187	-1.56633	2.52087	-0.977943	1.35778	-1.87211	2.16751	-2.06031
ENSG00000015475	BID	BH3 interacting domain death agonist [Source:HGNC Symbol;Acc:1050]	22	protein_coding	2.40058	4.80168	3.72338	4.53952	2.65822	3.12964	3.73537	4.17799	3.9337	3.43882	4.00361	4.75341	3.80311	2.83362	2.85733	2.56301	2.9363	2.97521	3.04435	3.36676	4.30283	5.12224	4.11607	3.24018	5.35506	4.68762	4.55025	3.2864	4.80449	4.07723	3.94335	4.87952	3.20376	3.29743	4.15891	3.82607	5.00289	3.46755	4.10147	4.48404
ENSG00000015479	MATR3	matrin 3 [Source:HGNC Symbol;Acc:6912]	5	protein_coding	7.2128	7.13026	7.59361	7.70947	7.79854	7.56818	7.49787	7.6759	7.66816	7.19851	7.79025	7.63588	7.35087	7.96075	8.07833	8.12281	8.05462	7.91118	7.91678	7.97649	7.77063	7.55795	7.89639	7.87821	7.61285	7.6759	7.29448	7.91865	7.52947	7.18991	7.2227	7.97451	7.81702	7.4569	7.41806	7.49426	7.02238	7.89639	7.23709	7.43952
ENSG00000015532	XYLT2	xylosyltransferase II [Source:HGNC Symbol;Acc:15517]	17	protein_coding	4.3104	4.61183	4.5587	4.02127	4.56683	4.45698	4.71583	4.57207	4.06904	4.1361	4.69915	5.02918	4.78988	5.25044	5.03552	5.44678	5.37579	5.08374	4.84488	4.72493	4.42601	5.53888	5.11316	4.58247	6.0165	4.51044	4.25888	5.21382	6.23963	4.43118	5.00509	4.37751	4.79382	4.47486	4.95205	5.24042	4.90259	5.44964	5.6919	5.35996
ENSG00000015568	RGPD5	RANBP2-like and GRIP domain containing 5 [Source:HGNC Symbol;Acc:32418]	2	protein_coding	7.04919	5.51774	5.50734	6.25061	6.22753	3.89886	4.39294	5.41702	4.99766	5.59977	4.67737	5.44038	6.33473	5.907	6.88685	6.36998	6.65055	6.12488	6.49858	6.93094	3.5781	5.38256	5.41576	5.86366	4.09809	4.65526	5.17181	6.15883	4.93502	5.39893	4.4516	6.3118	6.13884	6.47626	5.08845	5.11257	4.77234	5.86115	4.44763	5.68748
ENSG00000015676	NUDCD3	NudC domain containing 3 [Source:HGNC Symbol;Acc:22208]	7	protein_coding	5.06691	5.97904	6.62707	6.13683	5.86776	6.69962	6.32473	6.13644	5.791	7.00302	6.11968	6.43574	6.17451	6.62387	6.20916	6.25886	6.2468	6.21865	6.45245	6.13154	6.39414	6.36954	7.11208	5.81143	5.56472	6.57832	6.13389	6.11729	6.07335	6.68758	6.24547	6.20564	6.02656	6.29574	5.876	5.91496	6.09624	5.9439	5.84068	6.52142
ENSG00000016391	CHDH	choline dehydrogenase [Source:HGNC Symbol;Acc:24288]	3	protein_coding	6.19133	5.2739	5.90296	2.61253	5.12615	2.00722	3.81255	5.20029	5.29665	3.92799	6.25387	5.89619	3.80742	6.33686	6.50346	6.26627	7.08074	5.69227	6.18853	5.31992	6.21582	5.7539	5.30029	4.45495	5.48109	5.0459	4.05989	4.80652	6.45109	4.73334	6.75956	1.95492	4.73334	4.38139	5.40439	4.61245	5.22795	1.62385	3.42457	0.897336
ENSG00000016402	IL20RA	interleukin 20 receptor, alpha [Source:HGNC Symbol;Acc:6003]	6	protein_coding	-1.21038	0.312975	4.11569	1.21912	2.43413	3.17169	3.77966	3.12964	0.640505	4.24202	0.979594	1.75584	2.63898	5.29176	4.69951	4.97781	5.89476	4.08666	4.69373	4.22085	3.30621	1.33117	-1.45059	3.34153	-0.515132	2.6059	0.961679	3.27586	2.97818	5.94043	-0.474573	-0.275812	2.95381	0.161083	5.76321	-0.27294	2.15163	1.48692	-0.330336	0.942163
ENSG00000016864	GLT8D1	glycosyltransferase 8 domain containing 1 [Source:HGNC Symbol;Acc:24870]	3	protein_coding	5.26325	5.63266	5.27172	4.58569	5.77128	5.01371	5.06042	5.19729	4.67737	4.8773	5.12775	5.1754	5.49462	5.36505	5.07901	5.71821	5.55843	5.21544	5.3023	4.93244	4.61505	5.07836	4.42173	5.20575	5.14991	5.75281	5.13609	5.5531	4.95712	5.08496	4.77396	4.93708	5.0208	5.61198	5.18646	4.82962	5.32772	4.43755	5.58248	5.57907
ENSG00000017260	ATP2C1	ATPase, Ca++ transporting, type 2C, member 1 [Source:HGNC Symbol;Acc:13211]	3	protein_coding	7.40532	7.97211	7.3164	6.83877	6.66711	7.21076	7.30037	7.32545	7.36612	6.49113	7.05767	7.01807	6.20823	6.84773	6.53561	6.63226	6.49059	6.38755	6.22453	6.32687	7.15286	8.15504	6.94749	6.33514	7.69589	6.56718	7.7435	6.43074	8.58011	7.18037	7.17593	5.64988	6.60946	6.73386	6.50197	6.60123	7.14017	6.82477	7.25706	7.75937
ENSG00000017373	SRCIN1	SRC kinase signaling inhibitor 1 [Source:HGNC Symbol;Acc:29506]	17	protein_coding	4.10036	-2.94816	2.8032	0.583262	0.0366371	3.28304	5.2135	1.84893	-0.199483	4.05278	4.16897	4.14782	2.17411	2.93178	3.57184	3.43558	4.22161	2.73803	2.7545	3.20974	0.7461	2.79785	3.47174	1.91434	2.3221	2.71838	3.20172	2.24209	0.240459	3.71808	3.99079	0.507083	1.63811	4.08152	2.99592	4.07115	3.07722	2.15321	1.80537	0.855714
ENSG00000017427	IGF1	insulin-like growth factor 1 (somatomedin C) [Source:HGNC Symbol;Acc:5464]	12	protein_coding	2.58014	2.79413	6.08186	3.06452	3.14934	2.69659	4.97716	5.73856	3.32965	3.57584	5.26823	4.09728	6.72677	3.55905	3.99666	6.88107	5.47782	5.36337	5.32022	6.19741	1.92393	0.7461	0.927667	5.41345	5.24392	3.58197	3.31147	6.95782	1.06474	5.97157	1.02883	2.37066	5.8046	5.17109	6.05954	3.80001	2.78935	2.07532	4.4643	3.71194
ENSG00000017483	SLC38A5	solute carrier family 38, member 5 [Source:HGNC Symbol;Acc:18070]	X	protein_coding	1.64215	3.18448	2.1691	4.9679	5.11837	3.84824	2.856	2.44304	4.9817	3.86461	2.83648	2.90691	-0.317832	-0.29919	1.48018	1.32141	0.135843	2.63437	1.77168	1.10192	0.702591	2.74095	4.10577	1.16473	3.38598	3.59523	2.45706	2.90861	0.781617	1.4238	2.61314	3.92466	1.5265	2.13858	0.366873	1.59847	2.89334	0.000848969	4.88956	1.24484
ENSG00000017621	MAGIX	MAGI family member, X-linked [Source:HGNC Symbol;Acc:30006]	X	protein_coding	3.94847	2.77913	4.51995	0.266031	0.994893	1.78408	0.672213	2.08033	2.09646	2.76628	1.79165	2.59536	1.21663	3.59785	1.88011	1.88729	2.43126	1.67362	2.04069	1.38716	2.566	2.43262	3.66311	1.60179	2.92761	0.664725	2.40553	1.05314	-0.0280087	3.40012	1.14718	1.17537	1.03788	1.75489	3.59785	1.69427	2.40691	1.28832	1.35162	0.476203
ENSG00000017797	RALBP1	ralA binding protein 1 [Source:HGNC Symbol;Acc:9841]	18	protein_coding	5.89876	6.91394	7.30037	5.95442	6.21499	6.43947	6.42167	6.17337	7.16992	6.27943	6.9113	6.67325	6.39779	7.07117	6.03235	6.518	6.49011	6.21741	6.21821	6.2308	6.30699	6.7098	6.58199	6.70926	6.09974	5.90226	6.81567	6.197	5.95337	6.52824	8.53137	6.58729	6.14438	6.38158	6.25139	6.88963	6.10317	5.9146	6.61833	6.42937
ENSG00000018189	RUFY3	RUN and FYVE domain containing 3 [Source:HGNC Symbol;Acc:30285]	4	protein_coding	5.73218	4.58698	5.91825	5.16885	5.22639	4.39485	4.56231	5.38363	4.62119	5.13475	5.86733	4.68506	5.09639	5.53385	5.20575	5.30486	4.81006	5.73136	5.21798	5.04909	5.01656	4.38519	4.64464	5.54389	4.35169	5.07973	4.24829	5.68405	4.67705	5.31833	5.79536	4.52812	5.56809	5.89654	4.93502	6.0131	4.64369	4.88042	4.72887	4.9643
ENSG00000018236	CNTN1	contactin 1 [Source:HGNC Symbol;Acc:2171]	12	protein_coding	3.98269	4.65974	3.78047	5.21285	5.51465	1.83351	4.66617	4.81381	4.6931	4.83788	3.04335	3.50951	4.05314	4.36916	4.59214	5.14477	4.3791	3.68322	5.03969	4.97817	2.02702	2.03211	3.64943	3.80231	7.05156	4.65684	2.49999	4.4044	4.1423	5.03144	3.79187	5.12125	3.27483	2.55908	5.8739	3.63296	4.66105	2.39698	1.00528	3.16531
ENSG00000018280	SLC11A1	solute carrier family 11 (proton-coupled divalent metal ion transporter), member 1 [Source:HGNC Symbol;Acc:10907]	2	protein_coding	4.39454	5.01282	3.40963	3.43792	5.15956	4.66072	5.40439	3.35274	4.51965	4.1269	4.23662	2.71773	4.34359	0.0997573	0.633356	0.577706	1.21359	2.96907	-0.4206	3.85894	4.75821	4.99176	4.77678	3.38687	4.14711	4.22226	5.16339	2.65416	3.60605	2.55653	3.94445	3.77141	2.58851	3.27315	3.43558	3.10528	3.67177	3.76501	6.41736	6.02182
ENSG00000018408	WWTR1	WW domain containing transcription regulator 1 [Source:HGNC Symbol;Acc:24042]	3	protein_coding	6.98449	7.09853	6.75771	6.52042	6.84835	5.2481	5.98052	6.95089	7.0745	5.21984	6.89885	6.89031	6.43124	6.78645	6.93161	6.45939	6.25722	6.28713	6.90466	6.87831	6.41052	6.44829	6.83052	6.7459	6.84508	6.21447	7.40848	6.95712	6.73088	6.45153	7.99852	6.75901	6.17064	6.53414	6.52042	6.03371	6.22925	7.83068	6.6363	6.71137
ENSG00000018510	AGPS	alkylglycerone phosphate synthase [Source:HGNC Symbol;Acc:327]	2	protein_coding	4.62311	5.35537	5.2192	7.29048	5.24676	5.47112	4.75279	5.04029	5.58083	4.71845	4.7311	5.2151	5.6424	4.9814	5.13191	4.70585	4.78061	5.30326	5.15062	5.10289	6.03371	6.30451	5.15668	4.8829	5.52243	5.23776	5.4474	5.47583	5.75103	4.49223	5.72499	4.94722	5.31741	4.39454	4.93278	6.94502	6.11093	5.09292	5.27714	6.45611
ENSG00000018610	CXorf56	chromosome X open reading frame 56 [Source:HGNC Symbol;Acc:26239]	X	protein_coding	4.24313	4.68539	4.64078	4.47965	3.9403	5.24359	4.62311	4.49152	4.3073	4.45293	4.4064	4.44633	4.62473	4.58086	4.2727	4.34289	4.17555	4.39361	4.58185	4.64881	3.72178	4.41382	4.42529	4.14576	4.61731	4.14677	4.43379	4.31439	4.13725	4.42207	4.27478	4.08632	3.98197	3.89576	4.68062	5.0967	4.65556	3.91046	4.15388	4.46158
ENSG00000018625	ATP1A2	ATPase, Na+/K+ transporting, alpha 2 polypeptide [Source:HGNC Symbol;Acc:800]	1	protein_coding	-0.624961	-1.41522	0.513514	6.68812	-3.1306	0.296643	0.053835	1.15131	-0.982138	-1.17542	0.415814	0.573816	4.92166	2.25899	3.39408	4.11241	3.58549	4.1556	4.49861	6.083	-3.81005	-4.30364	-1.28235	1.49363	0.657254	0.419964	-1.72575	2.07212	0.562343	3.7666	-2.41223	0.541317	1.48143	0.0318332	-1.02328	-1.27191	-1.75462	4.38005	0.298722	0.240459
ENSG00000018699	TTC27	tetratricopeptide repeat domain 27 [Source:HGNC Symbol;Acc:25986]	2	protein_coding	4.27202	4.29078	3.98079	3.57584	4.61473	4.31274	4.09768	4.16502	4.50422	3.59221	4.14402	4.65653	3.67991	4.16757	4.10908	3.9007	4.14368	3.99627	4.06513	3.91351	5.13126	5.18031	3.95055	3.86706	4.02357	4.32213	4.48505	3.64769	5.32022	4.04497	5.05179	3.65113	4.32315	3.63036	3.77886	4.1972	4.27853	3.10313	3.9477	3.72704
ENSG00000018869	ZNF582	zinc finger protein 582 [Source:HGNC Symbol;Acc:26421]	19	protein_coding	2.37493	-0.441684	1.15773	3.19601	1.21912	1.43171	0.733633	1.94441	1.64696	1.08207	0.396785	0.347137	2.63645	1.94187	2.69538	2.41762	2.40137	1.91108	2.55773	2.78993	0.131142	-1.06269	-0.795845	1.93944	1.87541	2.18851	1.33477	1.56222	1.55996	1.02328	0.892241	2.55123	1.51895	2.08184	-0.959617	1.53279	1.43753	1.47342	1.33829	1.86781
ENSG00000019102	VSIG2	V-set and immunoglobulin domain containing 2 [Source:HGNC Symbol;Acc:17149]	11	protein_coding	0.0514021	2.3576	3.94372	-0.718292	0.864192	-0.871941	-2.35918	0.474325	-0.569099	-2.537	-1.83976	1.215	1.46056	3.88774	3.6945	3.62006	3.25246	1.24484	3.17418	1.59104	-1.03207	-3.2274	-2.85359	2.12681	-1.35712	4.46698	-2.22457	-0.430949	-1.38561	-0.647829	-2.38023	-2.73246	0.983051	1.40129	-1.57895	-1.56014	-2.46752	-1.47901	-2.58747	-2.32724
ENSG00000019144	PHLDB1	pleckstrin homology-like domain, family B, member 1 [Source:HGNC Symbol;Acc:23697]	11	protein_coding	5.04525	4.99147	6.04645	7.01521	7.19759	5.33165	6.29016	7.36917	6.09439	6.41555	6.08262	6.37406	8.40405	6.81624	7.21912	7.24832	6.47091	7.06085	6.98114	7.86034	5.04356	5.48443	5.80935	7.23537	6.34064	7.02238	6.38847	7.34352	5.40702	6.68426	5.83849	6.55428	6.49707	7.68784	5.332	7.69589	6.37135	7.66108	5.57113	7.28293
ENSG00000019169	MARCO	macrophage receptor with collagenous structure [Source:HGNC Symbol;Acc:6895]	2	protein_coding	2.99319	2.4035	0.911482	-3.33249	2.47177	4.67163	2.68873	1.92974	4.53202	-0.38477	1.27929	1.94628	2.40058	0.362759	-1.26074	-0.0804771	-1.15447	1.59003	-0.260093	-0.768432	2.03496	5.26677	3.08514	3.97158	4.41771	0.792025	4.46321	1.12793	5.05498	-1.58616	5.73753	4.06477	2.39698	-2.2428	1.37313	0.655444	2.2772	-1.04957	4.89479	2.08813
ENSG00000019186	CYP24A1	cytochrome P450, family 24, subfamily A, polypeptide 1 [Source:HGNC Symbol;Acc:2602]	20	protein_coding	-0.977943	-2.07924	-0.317832	0.301076	7.88544	2.38516	-1.59269	4.24202	3.15283	-1.85558	4.61087	1.11567	-1.13787	-1.3686	1.47916	4.69884	-1.69983	-0.455057	-1.72575	-1.59982	-1.29821	-0.0727513	0.0682297	-1.15447	-2.2428	4.2229	1.31789	-1.46189	6.99641	-3.11227	1.92893	-1.59982	0.268153	-0.0990215	2.51291	-3.20724	-2.93298	-0.858207	0.392776	0.053835
ENSG00000019485	PRDM11	PR domain containing 11 [Source:HGNC Symbol;Acc:13996]	11	protein_coding	2.37724	3.46004	3.02145	3.34106	2.24357	1.21663	1.27392	2.14022	3.44207	1.81927	1.66986	2.09485	2.93337	3.1602	3.17466	2.96691	2.76685	2.85178	3.09791	3.27586	2.70561	3.20224	3.02927	1.69628	2.85471	2.42298	2.72021	1.64885	2.46641	1.64215	2.49999	2.33735	2.24357	1.72618	2.77678	1.19349	1.40129	2.57707	1.62994	2.4978
ENSG00000019505	SYT13	synaptotagmin XIII [Source:HGNC Symbol;Acc:14962]	11	protein_coding	-2.91602	1.30118	3.85107	2.25295	-0.225497	-3.51182	-0.624961	0.419964	4.42173	-0.0677587	-2.74546	-3.88353	-1.67862	1.92974	0.903997	0.321222	1.72897	-1.75462	-1.75462	-1.90926	-0.266083	4.0492	2.92287	-2.4565	1.79982	-0.58586	3.97543	1.01604	3.24378	-3.48432	-1.18023	0.411553	-1.82335	-1.67198	1.24852	3.10907	-2.36915	-0.159419	-2.79053	3.86015
ENSG00000019549	SNAI2	snail family zinc finger 2 [Source:HGNC Symbol;Acc:11094]	8	protein_coding	3.69501	4.21038	6.13001	7.28293	6.16888	4.22123	5.43912	6.35783	3.56442	5.89546	5.2736	4.9817	5.73555	7.53813	6.71721	6.49113	5.68609	5.72994	5.43207	6.54256	6.37839	2.53395	4.18654	5.00065	4.10954	5.64079	4.98016	5.99114	4.24547	4.86512	3.784	5.19105	5.58376	5.55011	3.05633	4.8622	5.00661	8.18581	3.80901	6.38404
ENSG00000019582	CD74	CD74 molecule, major histocompatibility complex, class II invariant chain [Source:HGNC Symbol;Acc:1697]	5	protein_coding	9.553	9.08283	8.98364	9.69287	10.4631	11.1195	10.8564	10.5608	10.9788	9.98305	11.2154	10.2152	9.77351	9.02928	10.1789	10.5955	9.35987	11.2154	10.5108	9.95347	8.68704	10.9035	9.26214	10.7478	10.4028	9.49854	10.0134	11.2498	10.8115	10.1097	9.9731	10.0341	11.1823	10.2785	6.23199	9.59547	9.36586	8.11828	11.5364	9.9731
ENSG00000019991	HGF	hepatocyte growth factor (hepapoietin A; scatter factor) [Source:HGNC Symbol;Acc:4893]	7	protein_coding	1.40933	1.48255	4.69091	2.54939	2.97871	2.64802	2.34816	3.1602	1.63711	2.60064	3.89615	2.67834	4.40239	2.83587	3.79149	4.55932	3.76047	4.05844	4.67001	3.2737	1.36962	1.44814	0.786868	2.74037	2.56174	2.24357	2.19487	3.92429	0.963152	3.02714	1.06048	1.81097	3.1602	3.35274	1.37074	2.03031	2.10694	0.742807	3.3836	1.38716
ENSG00000019995	ZRANB1	zinc finger, RAN-binding domain containing 1 [Source:HGNC Symbol;Acc:18224]	10	protein_coding	5.94894	5.81039	5.40122	4.85827	5.60195	5.33899	4.74031	5.07373	4.86866	5.22828	5.39099	5.00691	5.92299	5.514	6.0611	5.75178	5.74483	5.683	5.78384	5.83278	5.00321	4.80714	5.52274	5.01523	6.24337	4.63709	5.47814	5.27623	5.15191	5.65577	5.39674	5.43053	5.10195	5.4229	5.51465	4.99797	7.7886	5.08812	4.98771	5.16917
ENSG00000020129	NCDN	neurochondrin [Source:HGNC Symbol;Acc:17597]	1	protein_coding	6.21905	5.90159	6.07954	6.11498	5.28017	5.09139	5.64008	5.01885	6.15921	5.30964	5.31578	4.56231	4.79538	5.84912	5.5257	5.71686	5.85142	5.37189	5.4704	5.17634	6.30352	5.03552	4.74002	5.81757	4.92799	5.01813	6.01431	5.19887	5.00853	5.24225	5.11936	4.73016	5.22957	5.9432	6.21193	4.57043	4.73489	6.13558	5.87737	5.33165
ENSG00000020181	GPR124	G protein-coupled receptor 124 [Source:HGNC Symbol;Acc:17849]	8	protein_coding	4.54403	4.41085	5.75783	6.03371	5.84809	4.31178	5.64638	6.5915	4.64013	5.45107	5.55474	5.37872	7.06885	5.6578	5.97082	7.11134	6.11688	7.04031	7.63993	6.94685	4.12297	3.60422	4.4148	6.06791	4.91693	5.54155	5.49256	6.52488	4.2157	5.97298	4.84951	5.24072	5.63332	5.76943	3.85726	4.89479	5.22409	7.54675	4.87983	9.02928
ENSG00000020256	ZFP64	ZFP64 zinc finger protein [Source:HGNC Symbol;Acc:15940]	20	protein_coding	3.89576	4.60602	4.29313	4.51766	4.53477	4.90964	3.98889	4.07689	4.35699	4.31006	3.83637	3.65754	3.60065	4.36415	3.85146	3.91275	3.92873	3.32272	3.87052	3.34358	5.49146	4.5206	5.37611	4.59054	5.13221	4.76402	4.8619	3.80001	5.71021	4.43279	5.28086	4.1556	3.64601	4.39222	4.69986	4.78187	4.1331	5.22828	4.0606	4.66137
ENSG00000020426	MNAT1	MNAT CDK-activating kinase assembly factor 1 [Source:HGNC Symbol;Acc:7181]	14	protein_coding	4.23076	3.06244	3.00075	2.89788	3.35521	3.35721	2.90861	2.34164	3.07044	3.33645	2.71655	3.31055	3.30325	3.1622	3.02927	2.44442	2.74207	2.51566	2.88888	2.71257	3.87014	3.82807	3.64521	3.80311	4.02892	4.05546	2.73065	2.53253	3.9878	3.81215	3.75061	3.73749	2.78876	3.58154	4.54791	2.96631	4.08599	3.2737	3.08622	3.32549
ENSG00000020577	SAMD4A	sterile alpha motif domain containing 4A [Source:HGNC Symbol;Acc:23023]	14	protein_coding	5.39957	6.35512	4.42529	5.09732	5.83849	3.72011	5.01204	4.73898	4.6969	5.33069	4.90752	5.27263	6.37448	4.40372	5.73787	4.76206	5.29633	5.09172	5.78638	6.45153	3.08043	4.25012	3.62313	4.86021	4.57555	5.61959	5.06875	4.67995	2.96276	4.47718	4.46986	4.54123	4.83156	6.14438	4.90933	5.44929	5.72641	4.33416	5.15894	5.0566
ENSG00000020633	RUNX3	runt-related transcription factor 3 [Source:HGNC Symbol;Acc:10473]	1	protein_coding	2.09057	4.75399	2.35933	4.47903	3.14333	3.9878	3.16588	4.06135	4.85759	3.17367	4.40607	4.63315	2.11998	3.09939	4.39329	3.95055	3.19698	4.43916	4.22697	3.23086	4.78856	4.17628	3.37295	3.17012	2.88942	2.78452	5.00602	4.51798	6.20646	2.35029	5.26451	3.84465	5.15322	3.19908	4.42987	2.82518	2.52929	5.43912	5.35833	4.70712
ENSG00000020922	MRE11A	MRE11 meiotic recombination 11 homolog A (S. cerevisiae) [Source:HGNC Symbol;Acc:7230]	11	protein_coding	4.70815	3.92725	4.16967	4.41182	3.60605	3.64985	4.11458	4.02472	4.03037	3.02481	4.10072	4.25315	4.07904	3.96301	4.22868	3.99114	3.81629	4.15853	3.80742	3.8375	4.47415	4.36343	4.44335	5.01989	4.74832	4.18826	4.63949	4.04708	4.68958	4.21122	4.36645	4.6089	4.33615	5.12645	4.18792	3.47383	3.91505	4.59633	4.23009	4.0478
ENSG00000021300	PLEKHB1	pleckstrin homology domain containing, family B (evectins) member 1 [Source:HGNC Symbol;Acc:19079]	11	protein_coding	5.15388	5.79433	5.20838	2.584	4.26703	2.11533	2.4035	6.46123	4.7771	-0.61151	5.65509	2.63239	1.74703	4.52222	5.19043	4.47873	4.5078	4.10036	4.20341	4.24132	5.19789	6.39595	4.12724	1.60284	7.57467	2.09485	5.86115	4.4778	3.29487	1.36962	3.97116	6.72733	5.08974	4.63738	7.12379	6.45153	5.0406	-0.387962	3.17367	1.19349
ENSG00000021355	SERPINB1	serpin peptidase inhibitor, clade B (ovalbumin), member 1 [Source:HGNC Symbol;Acc:3311]	6	protein_coding	5.09732	4.81162	5.45298	4.51733	5.42494	6.67151	6.21821	5.62197	6.03371	4.89121	5.69157	5.99672	6.522	5.66442	6.44126	5.76676	6.43124	6.06416	6.33345	6.14316	4.40277	5.67787	4.49223	5.2481	4.62278	6.56096	5.69707	6.31532	4.74799	5.77448	4.5206	4.51766	6.52142	5.28149	4.86796	4.14609	4.82265	4.48987	6.3364	6.17021
ENSG00000021574	SPAST	spastin [Source:HGNC Symbol;Acc:11233]	2	protein_coding	4.82796	4.59085	4.79475	4.15527	5.08496	4.69091	5.11348	4.82636	4.72165	4.39652	4.73551	5.07701	4.24515	4.49506	4.21369	4.25415	4.20036	4.02472	4.31274	4.00468	5.08686	5.09639	5.00412	4.23695	4.46759	4.6777	5.03431	4.36579	5.62232	4.56423	5.35112	5.04155	4.51667	3.87708	5.27203	4.59953	5.1058	4.32478	4.53006	4.61311
ENSG00000021645	NRXN3	neurexin 3 [Source:HGNC Symbol;Acc:8010]	14	protein_coding	2.90915	1.60913	1.81456	6.93727	1.67173	3.14659	4.43818	3.7172	3.03523	4.88476	4.0282	3.39687	2.48648	3.5358	4.03699	3.9845	3.26875	3.56757	2.43057	3.62947	1.86512	3.68499	2.32286	4.44109	3.17878	4.15253	1.67562	3.05057	1.81456	4.12547	3.75555	1.31193	3.09054	3.67177	7.65211	-0.285279	3.18141	4.48892	3.99114	4.63622
ENSG00000021762	OSBPL5	oxysterol binding protein-like 5 [Source:HGNC Symbol;Acc:16392]	11	protein_coding	2.42104	4.88735	5.16173	5.92543	4.30315	4.29011	5.69707	4.33517	3.4509	5.52809	4.15924	5.08404	5.39415	4.77396	4.63089	4.89183	5.04557	4.50712	4.44366	4.68257	5.39479	4.83125	4.60954	5.46268	4.80652	5.11708	4.25515	4.36145	3.86976	5.80037	4.72197	4.72786	4.07268	4.57752	3.9578	4.22663	5.89546	5.07125	3.87476	4.84137
ENSG00000021776	AQR	aquarius intron-binding spliceosomal factor [Source:HGNC Symbol;Acc:29513]	15	protein_coding	5.02516	5.11645	5.59411	4.83726	5.80822	6.02747	6.08186	5.47614	5.2983	5.77211	5.47646	5.02947	5.24042	5.72641	5.69881	5.50934	5.75924	5.71651	5.71583	5.45934	5.43641	6.26218	5.6707	5.73897	5.28412	5.43848	4.93114	5.48942	5.93601	6.22365	5.3774	5.68642	5.73325	5.88703	5.45869	5.56083	4.91389	5.36471	5.35147	4.83443
ENSG00000021826	CPS1	carbamoyl-phosphate synthase 1, mitochondrial [Source:HGNC Symbol;Acc:2323]	2	protein_coding	0.718443	1.57656	3.99996	4.72786	3.09571	0.725008	0.462275	4.46158	0.566122	0.860428	1.27686	0.693197	4.52516	2.78876	3.64481	3.2238	3.30716	3.75108	3.03584	3.3836	0.720055	-0.358702	1.32141	2.48328	2.35316	1.83984	1.18295	2.49568	1.62892	1.58491	-0.247644	2.50258	1.79628	4.23376	1.14047	5.78675	4.33083	-1.48479	-0.45177	0.170841
ENSG00000022267	FHL1	four and a half LIM domains 1 [Source:HGNC Symbol;Acc:3702]	X	protein_coding	5.00883	3.9974	3.75754	6.35081	5.13411	2.51093	4.88575	4.82039	3.41336	4.12581	5.03748	3.99377	10.2527	4.99835	5.23569	7.24457	5.6512	7.74982	7.40078	8.92225	1.30246	3.36493	2.73303	6.35124	5.31962	5.00781	3.19752	6.36059	4.01827	6.77213	3.75272	3.65797	5.76943	4.1135	2.80795	3.93138	4.46397	5.64604	4.21262	5.75103
ENSG00000022277	RTFDC1	replication termination factor 2 domain containing 1 [Source:HGNC Symbol;Acc:15890]	20	protein_coding	5.63054	5.21058	6.12359	5.72828	6.18101	6.22197	6.09403	5.88416	5.78132	5.36161	5.99782	5.55147	6.05294	6.0525	5.79673	5.69334	5.819	5.53416	5.95191	5.89088	6.74013	5.93458	6.64355	6.58047	6.21951	6.3074	5.91311	5.79605	6.44227	5.8317	5.40154	5.89546	5.515	5.48779	5.67854	6.18503	5.89911	6.15478	5.79251	6.56765
ENSG00000022556	NLRP2	NLR family, pyrin domain containing 2 [Source:HGNC Symbol;Acc:22948]	19	protein_coding	-0.0229565	7.51358	6.94685	-0.631748	7.36323	5.35901	5.37516	1.17908	-0.534745	-0.137026	3.91972	-0.718292	0.852428	6.09129	-2.29644	4.4867	3.29743	0.371032	3.72378	3.73827	5.33837	7.10565	0.466352	1.95671	4.78665	1.30118	1.11421	4.43183	7.3712	0.768075	1.78676	4.66934	3.77467	5.24133	6.40014	6.70811	6.09092	4.89744	1.08801	5.10612
ENSG00000022567	SLC45A4	solute carrier family 45, member 4 [Source:HGNC Symbol;Acc:29196]	8	protein_coding	6.01155	5.30646	4.47237	4.59987	5.23638	3.91926	4.24861	5.22277	4.45227	4.21038	5.40341	5.7189	3.72378	4.23761	4.39393	4.26538	4.28029	4.0243	3.79503	4.02515	4.02892	4.83977	4.88476	3.25353	4.43947	2.86645	4.14816	3.77141	4.75849	5.06722	5.46546	4.03485	3.94226	3.51501	4.85386	4.36113	4.42727	4.46128	4.42529	4.35598
ENSG00000022840	RNF10	ring finger protein 10 [Source:HGNC Symbol;Acc:10055]	12	protein_coding	6.48848	6.93031	6.5579	6.28634	6.64529	6.80525	7.00524	6.86913	7.02835	7.3829	6.66881	6.82931	7.13689	6.86643	6.84953	7.17507	7.21827	6.92695	7.09344	6.91816	6.5287	6.67694	6.24507	7.14298	6.71321	7.49426	7.18735	6.71191	6.5662	7.08002	6.50824	6.91816	6.86913	7.15119	6.9073	6.11729	6.88963	6.56152	6.90341	6.6281
ENSG00000022976	ZNF839	zinc finger protein 839 [Source:HGNC Symbol;Acc:20345]	14	protein_coding	4.38487	3.17269	3.67991	3.69546	3.09312	3.39823	3.31444	3.39636	3.96301	4.24756	4.47174	4.19139	3.93025	4.02016	4.43443	3.93726	4.28813	4.18826	4.13123	3.93455	4.03951	3.38413	4.01556	3.90033	3.4872	3.67519	3.45599	3.83234	2.23762	4.09926	3.62226	2.8325	4.05082	4.22258	4.03628	4.48569	2.57296	3.98669	3.5948	2.66256
ENSG00000023041	ZDHHC6	zinc finger, DHHC-type containing 6 [Source:HGNC Symbol;Acc:19160]	10	protein_coding	5.86438	5.43307	4.27303	4.29141	4.86698	5.44006	4.19212	4.32845	4.43581	3.84387	4.63796	4.40203	4.75279	4.56941	4.80418	5.04557	4.66744	4.66168	4.81287	4.80292	4.79816	4.652	5.10059	4.8648	4.65653	4.5847	5.21415	5.02918	5.20738	5.40896	5.32248	4.4619	5.25729	5.06238	5.158	4.70975	5.34432	4.77833	5.08278	4.90781
ENSG00000023171	GRAMD1B	GRAM domain containing 1B [Source:HGNC Symbol;Acc:29214]	11	protein_coding	2.76685	1.28551	2.17499	1.94628	1.6559	2.59536	3.23689	1.70622	2.47241	3.18845	2.75007	2.09646	1.81927	2.59915	2.55971	2.4237	1.42143	1.81561	2.01231	1.41691	1.04475	2.32286	1.24359	1.8101	1.69128	2.32461	1.61355	2.17162	1.36703	1.28175	1.72338	2.04849	2.7037	1.88092	1.55884	2.28148	1.85246	2.57894	3.7884	5.09793
ENSG00000023191	RNH1	ribonuclease/angiogenin inhibitor 1 [Source:HGNC Symbol;Acc:10074]	11	protein_coding	5.97157	7.2227	6.85012	7.49426	6.70069	6.89748	6.93161	6.49905	6.53216	7.00731	6.61369	7.11786	7.54298	6.72733	6.94749	7.04766	6.84773	7.14619	7.19352	7.26671	6.10276	6.76136	5.34979	7.16747	7.08406	6.5564	6.21499	6.73956	6.16088	6.42392	6.40829	6.61002	6.78702	6.57505	5.56156	5.42329	6.95712	6.40739	6.99711	7.32067
ENSG00000023228	NDUFS1	NADH dehydrogenase (ubiquinone) Fe-S protein 1, 75kDa (NADH-coenzyme Q reductase) [Source:HGNC Symbol;Acc:7707]	2	protein_coding	6.81863	6.86516	6.3364	8.15972	6.693	6.6754	7.43499	7.1555	6.2714	7.30156	6.65109	7.22183	7.31347	6.84319	7.09121	7.08239	7.17246	6.92376	7.09424	7.08561	6.94293	6.29972	7.0388	6.67799	7.08315	6.90217	7.02762	6.72511	6.18384	6.63124	6.9894	7.09928	6.88622	6.81393	6.07836	6.79785	7.01308	6.58614	6.23318	6.00688
ENSG00000023287	RB1CC1	RB1-inducible coiled-coil 1 [Source:HGNC Symbol;Acc:15574]	8	protein_coding	6.09705	6.61256	6.70188	6.35739	6.59974	6.81976	6.05789	5.70559	6.2627	4.70946	6.99108	7.15026	6.24843	6.44921	6.10704	5.93458	6.19216	5.95117	5.99028	5.90262	6.08186	6.3078	5.99855	5.84068	5.75458	5.31156	6.52968	6.10903	6.00885	6.20604	6.65174	6.43896	6.13078	5.62608	6.69851	5.79394	6.16888	6.83552	6.23607	6.57714
ENSG00000023318	ERP44	endoplasmic reticulum protein 44 [Source:HGNC Symbol;Acc:18311]	9	protein_coding	4.52353	4.86796	5.12158	4.5357	4.77615	6.51655	5.1754	4.43247	5.51595	5.20995	5.16402	4.91916	4.87315	4.57275	4.33784	4.75279	4.56941	4.61021	4.76206	4.38823	5.34821	5.515	4.96055	4.66327	5.23405	5.46139	5.35669	4.85607	4.96084	5.3686	4.96397	5.37189	4.73267	4.36952	6.5647	5.15862	5.41417	4.72723	5.38771	5.82599
ENSG00000023330	ALAS1	aminolevulinate, delta-, synthase 1 [Source:HGNC Symbol;Acc:396]	3	protein_coding	6.07601	5.54354	6.24337	4.5941	5.9135	6.1998	5.31515	5.23054	6.02785	5.51004	5.6543	5.9112	5.97157	5.64638	5.35996	5.21887	4.88259	5.83533	5.46476	5.23606	5.39991	5.54904	4.88197	5.68474	5.78744	5.95153	5.54837	5.48779	5.72278	5.07414	5.89728	5.55011	5.26712	5.08875	5.63332	5.25207	5.82599	4.90999	6.6743	6.20182
ENSG00000023445	BIRC3	baculoviral IAP repeat containing 3 [Source:HGNC Symbol;Acc:591]	11	protein_coding	4.22801	5.69443	5.3417	3.67907	5.60016	6.0891	5.63707	6.95712	7.39147	5.72499	7.7514	6.75771	4.64046	4.98955	6.65602	5.89021	5.00853	7.47727	6.12527	7.15736	2.92287	7.71404	2.71378	5.70134	5.36161	3.73322	4.52222	7.6002	7.89823	5.86401	5.06365	4.02285	7.98245	6.26135	3.07102	4.73267	3.56305	2.70306	9.14565	4.81852
ENSG00000023516	AKAP11	A kinase (PRKA) anchor protein 11 [Source:HGNC Symbol;Acc:369]	13	protein_coding	5.98987	6.43347	6.77462	6.84508	6.96542	6.73386	7.12776	7.23965	7.00302	6.8527	6.8731	7.00089	7.12379	7.11134	7.24362	7.35803	7.12256	7.49787	7.20819	7.29048	6.25681	6.41327	7.00158	6.6743	5.702	6.76441	6.40201	7.32758	5.71788	7.13605	5.60641	5.99598	7.12776	6.46568	6.02	7.00302	6.86397	6.33895	6.99261	6.75242
ENSG00000023572	GLRX2	glutaredoxin 2 [Source:HGNC Symbol;Acc:16065]	1	protein_coding	2.72823	4.45906	3.9758	2.08813	2.18851	4.20308	3.29236	2.70682	3.63729	3.88656	2.56389	4.23761	3.85288	2.92526	2.02028	1.33944	2.55458	1.76608	2.31487	2.05533	4.36517	3.72138	3.39779	3.73491	3.30814	3.58239	3.13228	2.3539	3.26063	4.26055	3.72866	2.68133	3.10261	2.76628	2.94097	4.17001	4.64495	3.11058	3.11173	3.287
ENSG00000023608	SNAPC1	small nuclear RNA activating complex, polypeptide 1, 43kDa [Source:HGNC Symbol;Acc:11134]	14	protein_coding	2.96907	2.13478	2.03575	1.92568	2.43917	2.31047	2.44369	1.6678	1.99618	2.79117	1.93591	2.69659	3.03966	1.82285	2.63898	1.76608	2.52729	2.2353	2.23076	1.77752	3.24869	3.3626	1.94105	1.89426	3.06136	2.02795	2.45013	2.31935	3.09622	2.31693	2.9826	2.99483	1.97892	1.94105	2.86534	2.00381	3.71111	4.04815	2.66569	4.17178
ENSG00000023697	DERA	deoxyribose-phosphate aldolase (putative) [Source:HGNC Symbol;Acc:24269]	12	protein_coding	3.77842	4.07008	4.35871	2.86589	4.33278	4.14885	3.91577	3.7666	4.39155	4.41543	3.68928	3.73414	3.84264	3.63207	2.88547	3.04941	3.71888	3.25143	3.31339	3.02979	3.75393	5.23343	4.91481	3.94926	3.10745	3.74108	3.35081	3.23141	5.76528	3.9551	4.23521	4.3624	3.59968	2.42167	4.51044	3.9626	3.47232	2.9058	3.55223	4.08666
ENSG00000023734	STRAP	serine/threonine kinase receptor associated protein [Source:HGNC Symbol;Acc:30796]	12	protein_coding	6.07212	7.59611	7.24642	5.50528	6.98317	6.21113	5.79747	6.80774	6.53265	6.59567	6.12171	5.42855	6.44175	6.54305	5.6512	5.78675	6.45801	5.331	6.01	6.01579	6.72839	7.15898	6.73843	5.8977	5.12872	5.89476	6.17489	5.71236	8.20273	6.09624	6.51405	6.17143	6.22197	5.13411	6.68248	6.60946	5.98491	5.60986	5.62985	7.05156
ENSG00000023839	ABCC2	ATP-binding cassette, sub-family C (CFTR/MRP), member 2 [Source:HGNC Symbol;Acc:53]	10	protein_coding	0.312975	-2.20601	0.560545	-0.444698	-0.240619	1.88533	-1.13787	-1.83976	0.18012	5.11837	-0.696245	-0.455057	1.6309	-0.305498	-0.394332	-1.04096	-0.658779	0.0918104	3.07343	-0.711151	0.112177	-0.551249	0.598654	0.887277	-1.13318	2.67657	-1.46728	-0.880802	0.358433	5.21058	4.45698	1.35162	-0.358702	0.689567	1.3048	0.786868	-1.04542	0.307836	0.925681	0.824368
ENSG00000023892	DEF6	differentially expressed in FDCP 6 homolog (mouse) [Source:HGNC Symbol;Acc:2760]	6	protein_coding	4.61473	4.57752	4.01255	2.88063	4.70271	4.88164	3.82568	4.68762	5.66591	3.74315	5.68232	4.62054	2.49039	4.19348	4.38989	4.41413	3.91469	5.22079	4.23695	4.07904	3.45372	4.72096	4.10722	4.56296	4.81412	2.8579	3.92988	5.92854	4.92769	4.20208	4.30559	3.27315	6.33431	4.7537	2.856	3.14129	3.60867	4.45324	6.28793	4.03
ENSG00000023902	PLEKHO1	pleckstrin homology domain containing, family O member 1 [Source:HGNC Symbol;Acc:24310]	1	protein_coding	4.80621	5.00916	4.20968	5.90262	6.25139	5.54055	5.37872	5.85289	6.09548	5.35802	5.89583	5.39196	4.7352	3.82187	5.41261	5.64885	4.34864	6.07754	5.42429	5.01722	6.16411	5.77128	5.90626	5.77448	6.12722	5.23308	5.76676	6.81624	5.98491	4.8545	5.67507	5.95702	6.46863	5.98196	4.09852	5.28925	4.89121	6.693	6.85903	6.32643
ENSG00000023909	GCLM	glutamate-cysteine ligase, modifier subunit [Source:HGNC Symbol;Acc:4312]	1	protein_coding	4.32951	6.27901	4.73613	3.52408	4.94693	5.5432	4.44732	5.23471	4.86283	5.05313	4.51335	5.40122	5.4861	4.45906	4.50223	4.55901	4.16176	4.66007	4.82764	4.55453	3.24726	5.48078	4.28477	4.87571	4.26265	6.71137	5.1526	4.71969	5.84068	5.43271	4.96922	3.93455	4.48795	4.46599	3.75312	4.78277	5.25269	5.06138	4.5587	6.21074
ENSG00000024048	UBR2	ubiquitin protein ligase E3 component n-recognin 2 [Source:HGNC Symbol;Acc:21289]	6	protein_coding	6.5382	5.90091	6.01724	5.70694	5.77774	6.3683	6.23764	6.17064	6.7882	5.28377	5.95775	6.19174	6.14046	6.28363	6.25761	6.36415	6.18933	6.50048	6.14754	6.19501	5.4943	6.44921	6.14277	6.15516	5.37449	5.95887	6.09439	6.47929	6.03628	6.36954	5.86115	6.51754	6.60123	6.30105	6.18619	4.82232	5.60776	6.43486	6.36415	5.71167
ENSG00000024422	EHD2	EH-domain containing 2 [Source:HGNC Symbol;Acc:3243]	19	protein_coding	4.73712	6.47	6.05331	6.05331	7.16243	4.53631	6.25345	6.55378	5.42558	6.05754	5.91162	5.91496	9.02928	6.64939	6.89619	7.444	6.58248	7.74665	7.35803	7.92053	3.36631	5.35964	5.0478	6.33726	5.4361	6.22498	5.81281	6.93161	4.16862	6.16756	3.81789	5.59871	6.3487	6.10163	3.41888	5.86115	6.32737	6.95577	4.99643	3.549
ENSG00000024526	DEPDC1	DEP domain containing 1 [Source:HGNC Symbol;Acc:22949]	1	protein_coding	5.55044	5.69807	4.79087	5.73522	3.70617	5.86258	5.30453	4.79787	5.04688	3.15807	4.72197	5.09995	0.121577	2.70619	1.69012	0.850825	1.47916	1.64215	-2.27426	-0.655136	6.49261	5.63477	6.31311	6.05294	4.90259	4.61731	5.332	1.63296	6.59666	4.5649	6.03159	5.74238	4.30833	4.13939	5.5181	5.34398	5.3244	6.13229	3.94519	6.33473
ENSG00000024862	CCDC28A	coiled-coil domain containing 28A [Source:HGNC Symbol;Acc:21098]	6	protein_coding	3.22328	2.81937	2.61693	2.60195	2.4806	3.006	2.99536	3.44574	3.23913	2.79966	4.31306	2.86645	4.06582	3.74188	3.39687	3.64051	3.85726	3.29689	3.63164	3.51735	3.02354	3.00343	3.31394	2.90915	1.99618	2.85291	3.22779	3.37716	4.12512	3.04229	2.84938	3.89848	3.26014	2.33455	3.96779	2.94709	3.06728	3.01467	3.75923	3.59041
ENSG00000025039	RRAGD	Ras-related GTP binding D [Source:HGNC Symbol;Acc:19903]	6	protein_coding	4.91633	4.93215	5.88987	4.30698	3.09622	3.55397	3.47429	4.12297	4.32985	4.3365	3.27315	5.95775	5.33265	5.34099	4.7957	3.65072	3.15605	3.94809	4.73804	4.84552	3.36724	5.42855	4.80042	3.67603	3.34358	4.90478	2.84997	3.72054	4.56265	4.94601	4.64655	5.1074	3.7759	3.28849	4.61021	4.63251	2.10025	5.85323	4.48267	4.72786
ENSG00000025156	HSF2	heat shock transcription factor 2 [Source:HGNC Symbol;Acc:5225]	6	protein_coding	3.28204	4.1423	4.01756	3.66878	3.82302	3.32073	4.73489	4.33245	3.34849	3.3781	3.59266	3.27686	3.59692	3.71497	3.53034	3.48514	3.28802	3.31055	3.89615	3.7025	4.17555	3.84465	4.30765	2.64991	3.70209	3.29839	3.8862	3.12635	5.08031	3.32549	3.81471	5.29241	3.68366	3.26357	4.89055	4.20341	4.4276	4.72656	3.02927	4.31178
ENSG00000025293	PHF20	PHD finger protein 20 [Source:HGNC Symbol;Acc:16098]	20	protein_coding	5.49076	5.03276	6.0891	5.88083	5.98344	6.00116	6.28964	5.71955	5.60712	6.28503	5.3228	5.20347	5.73391	6.22925	5.88416	5.876	6.03932	5.57459	6.00342	5.88703	6.34289	5.68748	5.69773	6.14316	5.60812	5.52504	6.24639	5.77359	5.68712	6.14872	5.0967	6.10276	5.94285	5.91972	5.35901	5.68538	6.24169	6.20996	5.27452	6.21193
ENSG00000025423	HSD17B6	hydroxysteroid (17-beta) dehydrogenase 6 [Source:HGNC Symbol;Acc:23316]	12	protein_coding	2.14702	1.29081	-0.737393	-0.115787	2.48328	0.616956	2.32286	1.26877	0.631508	1.35645	1.49572	-0.391365	0.333911	-2.04984	-2.69094	-1.62517	-1.51433	-2.91602	-0.680082	-2.17046	1.64405	0.533001	0.821336	1.17537	2.06191	2.37066	2.14785	1.2675	1.72434	3.12111	2.64738	1.34693	-2.22457	-0.205617	1.97733	-0.0101143	3.95133	0.424053	0.131142	3.52187
ENSG00000025434	NR1H3	nuclear receptor subfamily 1, group H, member 3 [Source:HGNC Symbol;Acc:7966]	11	protein_coding	3.91726	3.80548	4.20829	2.28975	4.19753	5.18549	4.64881	3.89415	4.79314	3.78677	4.72589	4.85042	6.0023	3.85645	3.80507	4.73866	3.81058	4.99147	3.76047	3.89653	5.61525	4.85961	3.7876	5.50224	4.67455	4.04097	4.49316	4.4516	3.40069	5.56472	4.35	4.70712	3.95474	4.32845	3.6095	3.56667	3.87747	2.92887	6.08186	4.12896
ENSG00000025708	TYMP	thymidine phosphorylase [Source:HGNC Symbol;Acc:3148]	22	protein_coding	6.78931	8.56522	7.17329	7.90376	9.19733	9.70069	8.62732	8.32589	9.99308	9.29013	9.49189	8.51238	7.12536	6.15315	7.12536	7.60433	6.8723	9.00171	7.3839	6.95999	7.20016	8.4661	6.77462	8.73088	8.06318	6.77036	7.50757	8.3812	8.45105	8.36156	8.57351	7.66816	7.86034	8.63076	4.21792	6.59666	6.83052	6.42346	10.121	8.08051
ENSG00000025770	NCAPH2	non-SMC condensin II complex, subunit H2 [Source:HGNC Symbol;Acc:25071]	22	protein_coding	5.62504	5.09323	5.09107	8.03559	5.83642	5.57426	5.43307	5.79355	6.44502	5.55736	5.95849	5.86626	5.70064	5.06011	5.84843	5.38679	5.40797	5.61235	5.54462	5.57739	5.78054	5.65847	6.72238	5.62708	6.00116	5.18322	4.93502	5.63577	6.30187	4.99939	5.1676	6.26585	5.20379	5.43641	5.98576	5.66274	5.52777	6.30187	5.00353	4.65297
ENSG00000025772	TOMM34	translocase of outer mitochondrial membrane 34 [Source:HGNC Symbol;Acc:15746]	20	protein_coding	3.86544	5.30871	5.46333	5.12158	6.11647	5.36795	5.29697	5.81005	5.37839	4.6726	4.16536	4.87983	4.03342	5.00853	4.49019	4.43215	4.73395	4.49604	4.16261	4.36984	6.39779	4.32149	5.3241	4.86698	5.36195	4.90068	5.44611	4.64269	5.81712	4.98992	4.92257	5.53146	5.09609	4.74507	4.99328	5.97974	5.42429	5.35476	4.48892	5.91162
ENSG00000025796	SEC63	SEC63 homolog (S. cerevisiae) [Source:HGNC Symbol;Acc:21082]	6	protein_coding	6.52537	6.81681	6.32432	5.86222	6.47187	5.99308	6.8527	7.1335	6.39883	6.31751	5.98721	5.57006	6.19216	6.32603	6.10589	5.95522	6.33514	5.97724	6.20142	6.20182	6.99408	5.73522	6.19133	6.10819	6.09205	6.82796	6.77213	6.23002	6.93514	6.6063	6.58677	7.31142	6.42937	5.89983	7.77388	6.35739	6.91326	6.83174	6.31356	6.77036
ENSG00000025800	KPNA6	karyopherin alpha 6 (importin alpha 7) [Source:HGNC Symbol;Acc:6399]	1	protein_coding	6.97065	7.24544	6.5657	7.14179	6.57601	6.71085	6.92376	6.49521	6.6389	6.73209	7.03195	6.99179	6.58047	6.68863	6.89748	6.57832	6.70864	6.56049	6.84189	6.81976	7.32977	7.83585	6.54102	7.22456	6.44081	6.69851	6.6389	6.51309	6.87105	7.15119	7.40848	6.72567	6.85656	6.71551	7.43286	6.17021	6.4773	7.42712	6.33514	6.72057
ENSG00000026025	VIM	vimentin [Source:HGNC Symbol;Acc:12692]	10	protein_coding	9.31296	10.7286	10.6687	11.3227	11.0607	9.92464	10.4788	11.3615	11.0896	10.5438	10.9035	10.2785	11.6957	10.4028	10.7274	11.2154	10.3183	11.4893	11.2154	11.5863	11.2498	11.4893	11.7562	11.0607	11.4893	10.5608	11.2855	11.1195	11.7562	10.332	10.7686	10.8564	10.9035	10.5438	7.64797	10.6879	10.5608	11.4893	10.7898	11.4893
ENSG00000026036	RTEL1-TNFRSF6B	RTEL1-TNFRSF6B readthrough (NMD candidate) [Source:HGNC Symbol;Acc:44095]	20	protein_coding	4.92453	2.45986	3.02043	4.70553	3.92799	4.01372	3.82889	2.69417	2.88371	3.11939	3.20871	2.95435	3.55862	2.90394	3.46305	3.15082	3.14763	3.47842	3.27216	4.24793	3.89003	2.4035	4.1061	4.21677	2.41617	3.75351	3.21617	3.74069	4.44433	3.42646	2.80913	3.32596	3.43882	4.29487	2.32006	4.98016	2.96103	4.66137	3.83311	3.89693
ENSG00000026103	FAS	Fas cell surface death receptor [Source:HGNC Symbol;Acc:11920]	10	protein_coding	3.04229	4.87445	4.34831	3.01633	5.37907	4.69915	3.6146	4.53406	5.08404	4.72002	3.85565	4.64849	3.78242	4.41019	5.13609	4.48036	3.33899	5.40665	4.71293	4.90009	2.84997	4.37471	1.58179	4.17555	3.39636	3.48606	3.24173	5.08312	6.50776	3.72338	3.67907	3.4872	4.74316	6.01155	2.26113	3.84824	3.5459	4.26433	6.28456	5.9734
ENSG00000026297	RNASET2	ribonuclease T2 [Source:HGNC Symbol;Acc:21686]	6	protein_coding	5.05313	4.53691	5.53289	4.07866	5.32741	5.53353	6.20954	6.2468	5.38329	6.22841	6.20685	6.3483	4.08446	4.92453	5.44832	5.35571	5.66725	5.19633	5.4637	4.97501	5.72535	5.28377	4.53787	5.99973	4.77523	6.41008	6.08945	6.14046	5.0114	6.75956	4.97501	5.6974	6.69741	5.8317	5.40862	5.80935	5.40056	6.07874	7.20186	5.61019
ENSG00000026508	CD44	CD44 molecule (Indian blood group) [Source:HGNC Symbol;Acc:1681]	11	protein_coding	8.7161	8.00617	7.41498	8.07181	9.02928	7.68342	9.31873	8.79557	9.13556	9.12055	7.90561	8.26527	7.43841	7.21703	7.87461	8.08708	8.56693	8.57681	7.59486	7.62658	8.21497	8.10704	9.21323	8.30711	7.86924	7.83931	8.41855	8.6586	8.42439	8.59343	8.03769	8.88006	8.88006	8.78392	8.90099	7.64127	8.73833	7.7886	8.76093	7.90376
ENSG00000026559	KCNG1	potassium voltage-gated channel, subfamily G, member 1 [Source:HGNC Symbol;Acc:6248]	20	protein_coding	-2.29644	4.56941	4.6578	6.57232	1.83181	4.38956	1.07321	1.93861	4.24031	3.48198	4.72232	4.23488	-1.44525	3.41931	2.63575	1.12383	1.97407	0.642193	0.285963	0.880802	3.84907	3.98234	5.83675	-0.408006	-1.39086	3.77928	3.94372	3.48924	6.39154	2.20634	6.43617	0.116758	1.64599	0.175379	2.60461	3.46711	-1.76774	4.83726	2.97293	3.94975
ENSG00000026652	AGPAT4	1-acylglycerol-3-phosphate O-acyltransferase 4 [Source:HGNC Symbol;Acc:20885]	6	protein_coding	1.88902	3.54945	4.80652	5.41062	4.80388	2.51422	3.18642	4.3821	3.02145	3.66091	3.47472	3.37108	3.86816	4.1503	3.35422	3.30763	2.64676	3.67222	3.35222	3.81712	5.12741	3.73827	4.43883	3.8755	1.85516	3.52187	5.07274	3.77217	2.91793	2.10772	3.78357	4.16261	3.4649	3.80001	2.9045	4.08406	2.17934	6.07491	2.71378	4.92288
ENSG00000026751	SLAMF7	SLAM family member 7 [Source:HGNC Symbol;Acc:21394]	1	protein_coding	4.36952	3.3781	3.37205	1.79628	4.79347	6.96961	5.53755	4.85486	7.27242	4.08446	6.2627	5.52439	2.43848	2.79413	4.62505	4.68348	2.15987	6.36017	5.35901	4.60921	2.1668	5.26079	3.34358	5.63808	5.1871	2.72263	4.15102	6.37088	2.39904	5.12775	4.95802	4.76238	5.17897	4.41382	0.867736	3.01362	4.33176	1.27531	8.78392	3.51735
ENSG00000026950	BTN3A1	butyrophilin, subfamily 3, member A1 [Source:HGNC Symbol;Acc:1138]	6	protein_coding	5.76104	5.62953	5.49219	5.30964	5.97157	7.00593	6.2692	6.0401	6.91624	5.46063	6.94154	5.57179	6.06906	5.51367	6.34107	7.08161	5.5487	7.36815	6.18813	6.29972	4.29968	7.18117	4.75497	6.54566	6.31793	5.18679	6.26356	7.59611	6.64178	5.25394	6.02146	5.56505	7.01521	6.6545	5.28574	5.15572	5.11645	5.23741	7.64797	6.33391
ENSG00000027001	MIPEP	mitochondrial intermediate peptidase [Source:HGNC Symbol;Acc:7104]	13	protein_coding	3.42267	3.41475	3.87708	3.44395	3.57459	4.13344	4.95205	2.96223	2.95603	4.95144	3.23339	3.90461	3.39116	3.59692	3.69277	3.49386	4.49285	3.22126	3.68785	3.51636	4.17281	4.17001	3.97203	3.42409	3.06452	4.43183	3.78007	3.03911	5.42462	4.10869	3.5459	4.79847	3.42996	2.97574	4.02206	3.87785	4.446	2.76448	3.53122	2.75982
ENSG00000027075	PRKCH	protein kinase C, eta [Source:HGNC Symbol;Acc:9403]	14	protein_coding	5.702	5.13705	5.22349	2.93337	5.20379	6.20777	5.73822	5.38999	5.93352	5.49182	6.64529	6.29755	6.12527	5.82486	5.59871	5.83777	5.38292	6.23569	5.75682	6.02146	4.36113	4.85827	3.95327	5.84531	4.23591	5.45035	5.09107	6.03516	5.10322	5.29797	5.14957	4.61408	6.56096	5.68609	2.95551	4.47141	5.21768	4.05989	6.76978	4.69628
ENSG00000027644	INSRR	insulin receptor-related receptor [Source:HGNC Symbol;Acc:6093]	1	protein_coding	-1.29262	-2.03275	-1.37392	0.424053	1.29493	-2.25312	0.940735	0.146626	-2.13433	0.581363	-1.87211	-2.25312	-0.551249	-0.22282	0.276813	0.754371	-0.801998	0.879112	0.192055	1.39065	-2.27426	-1.7475	-0.795845	-0.225497	-1.28765	-0.368239	-1.87909	-0.499282	2.59979	-1.17542	-2.02371	-0.275812	-0.00236655	-0.0804771	-2.29644	-2.02371	0.0710442	4.26538	0.562343	3.46936
ENSG00000027697	IFNGR1	interferon gamma receptor 1 [Source:HGNC Symbol;Acc:5439]	6	protein_coding	6.17862	5.54462	6.0065	5.04456	6.21363	7.33888	7.38817	6.95165	6.51655	6.62606	7.12614	6.37318	7.83068	6.35378	7.01738	6.93439	6.90991	6.92107	6.81567	7.41191	5.64144	5.03814	5.1871	6.63783	4.91141	6.83751	7.30037	7.05767	6.61883	6.69241	5.22859	5.47006	7.18823	6.14277	5.27683	5.54803	6.3483	6.41422	6.68812	6.80585
ENSG00000027847	B4GALT7	xylosylprotein beta 1,4-galactosyltransferase, polypeptide 7 [Source:HGNC Symbol;Acc:930]	5	protein_coding	3.73108	4.1376	3.96112	3.66091	3.8375	4.24977	4.13123	4.1262	3.85065	4.21758	4.04603	4.28883	4.36208	3.96472	4.2314	4.19348	3.92316	3.87991	3.74963	4.04568	4.10358	4.29313	3.9224	4.40803	4.3507	4.51571	3.84348	4.31404	4.34629	3.96038	3.79073	3.76008	3.85447	4.12967	4.5992	4.02892	4.3594	5.40995	4.40917	6.51655
ENSG00000027869	SH2D2A	SH2 domain containing 2A [Source:HGNC Symbol;Acc:10821]	1	protein_coding	2.2889	2.38516	1.67464	1.74122	2.38872	3.15184	1.80248	2.80795	3.79584	1.69128	1.90764	2.55523	-0.0754539	0.778367	0.699098	1.48143	-1.33487	2.88314	0.335901	0.607599	2.86134	3.29635	0.187052	2.34231	2.17322	1.19923	2.07958	3.12964	2.10694	0.45626	4.22868	2.14329	3.42085	2.34369	1.10061	2.2443	1.50566	1.18421	4.46632	2.64931
ENSG00000028116	VRK2	vaccinia related kinase 2 [Source:HGNC Symbol;Acc:12719]	2	protein_coding	5.23809	5.21887	4.79314	3.24726	5.0459	5.07901	5.24133	4.2911	5.70476	5.2491	5.09202	5.46099	4.25955	4.17628	3.73749	3.92391	5.74171	4.32213	4.38105	3.96963	5.09828	5.8217	4.09999	4.27541	4.97501	5.2739	5.20903	4.37879	5.10772	4.4167	5.4603	5.20284	4.6115	4.51268	5.35215	4.39619	5.29502	3.63553	5.92726	4.14953
ENSG00000028137	TNFRSF1B	tumor necrosis factor receptor superfamily, member 1B [Source:HGNC Symbol;Acc:11917]	1	protein_coding	4.11421	4.81287	4.50483	4.07513	5.1074	5.85579	5.26551	5.85972	6.08225	4.90478	6.17657	5.86972	6.38671	4.39986	5.50224	5.85617	4.90321	6.59717	5.64144	5.98052	4.21609	5.6571	3.80783	5.78528	5.07095	4.56199	4.76336	6.2308	6.02502	4.97619	4.85991	5.01342	6.42441	5.2498	3.19307	4.36415	3.74756	3.45372	7.11457	5.7465
ENSG00000028203	VEZT	vezatin, adherens junctions transmembrane protein [Source:HGNC Symbol;Acc:18258]	12	protein_coding	5.74858	6.25722	5.11546	5.22379	5.7445	4.94722	6.07258	5.11348	4.81195	5.72752	5.19197	4.4867	5.20773	5.6009	5.71548	5.60124	5.88841	5.28702	5.43578	5.39162	5.10195	5.18256	5.36027	5.33968	5.26985	6.09624	6.01465	5.37516	5.3241	4.81162	5.07701	5.51131	5.1663	6.53163	4.99543	5.33632	5.56542	5.20934	5.20541	5.4993
ENSG00000028277	POU2F2	POU class 2 homeobox 2 [Source:HGNC Symbol;Acc:9213]	19	protein_coding	1.81561	1.95492	-0.16835	2.04418	2.95551	3.46624	1.68059	2.8682	3.78242	1.89426	3.10637	2.30981	1.22834	0.119112	2.03211	1.97236	0.224371	2.59794	2.87591	1.38159	1.42603	2.44788	2.09646	1.25479	2.97701	1.74225	1.87266	4.546	1.31789	3.86897	2.25671	2.17859	4.5931	2.4035	0.615162	0.13841	2.09311	1.26877	5.15634	2.62342
ENSG00000028310	BRD9	bromodomain containing 9 [Source:HGNC Symbol;Acc:25818]	5	protein_coding	5.08031	5.08278	5.40471	3.64006	4.91356	4.38789	5.04029	5.10396	5.13935	4.87508	4.87191	4.8754	5.2135	4.92704	5.14957	4.46698	4.9785	4.92166	4.78383	5.16952	5.40797	5.72926	5.67682	5.19395	5.1526	5.08875	6.0127	5.19565	5.28805	4.68858	4.802	5.02702	5.30838	6.29489	5.72097	5.50803	4.87191	5.93892	4.98617	5.45658
ENSG00000028528	SNX1	sorting nexin 1 [Source:HGNC Symbol;Acc:11172]	15	protein_coding	6.00729	4.83757	6.18062	5.29997	6.39414	6.51896	6.78931	7.3046	5.8503	6.34064	6.38449	5.77524	7.57467	7.27714	7.37462	7.67449	7.46735	7.28013	7.47106	7.42949	5.62871	5.98806	6.46863	6.89885	7.02123	6.19008	5.57673	7.14542	5.78638	6.83241	5.00033	6.18657	7.16992	6.68812	6.14793	5.50604	5.94675	6.12488	6.3437	6.46522
ENSG00000028839	TBPL1	TBP-like 1 [Source:HGNC Symbol;Acc:11589]	6	protein_coding	2.4871	3.11226	2.99432	3.25449	3.87476	3.13487	3.08043	3.42602	2.92396	2.46704	3.84264	3.2933	2.96517	2.59794	2.60802	2.7239	2.91793	2.36082	2.66194	2.79413	3.74876	3.19425	3.62142	3.09154	3.42943	3.73749	3.53034	2.74263	4.06904	2.9174	3.75153	4.05388	3.25646	3.67519	4.4867	3.45647	3.72338	3.76579	3.4546	3.81948
ENSG00000029153	ARNTL2	aryl hydrocarbon receptor nuclear translocator-like 2 [Source:HGNC Symbol;Acc:18984]	12	protein_coding	2.60861	6.50922	5.11316	2.18011	6.35425	4.39122	3.5649	3.17565	4.80838	4.99673	4.18402	4.55259	2.37576	3.47647	3.0942	1.60483	1.20441	2.88719	2.39154	2.24136	3.69361	6.51608	3.2864	1.38384	4.56652	3.33362	4.61021	3.76459	6.21239	1.60483	4.31618	3.14816	3.76168	2.6074	3.73066	2.51631	2.99536	2.39353	5.17929	2.9826
ENSG00000029363	BCLAF1	BCL2-associated transcription factor 1 [Source:HGNC Symbol;Acc:16863]	6	protein_coding	7.02609	7.09502	7.69889	7.63865	7.77876	7.40741	7.24362	8.08708	7.82383	7.47727	7.9627	7.50164	7.3245	7.91491	8.18821	8.05675	7.98445	8.08489	8.12054	8.00461	7.62658	6.94812	8.08708	7.95491	7.51778	7.35803	7.8324	8.05462	8.18581	7.75299	7.42489	8.57022	8.19545	7.80354	7.7674	8.26014	8.05462	8.50299	7.53188	7.66816
ENSG00000029364	SLC39A9	solute carrier family 39, member 9 [Source:HGNC Symbol;Acc:20182]	14	protein_coding	7.32664	6.25179	6.06906	5.74106	5.88042	6.5209	6.33047	6.55532	6.47929	7.10487	6.19216	6.38309	6.42441	6.62656	6.60337	6.78534	7.07524	6.51203	6.6468	6.49707	6.21995	5.96329	7.19759	6.68369	6.693	6.78763	5.99345	6.22498	6.47091	6.53606	6.4445	6.65549	6.06867	6.5657	6.34686	6.40613	5.98806	5.75599	6.19216	6.60797
ENSG00000029534	ANK1	ankyrin 1, erythrocytic [Source:HGNC Symbol;Acc:492]	8	protein_coding	0.497654	0.869339	1.95149	0.664725	-0.156555	0.903997	0.0244288	-0.32394	1.10192	-0.655136	1.34061	1.28047	1.01022	1.90233	1.03482	-1.29262	-1.88724	0.849288	-1.93582	-1.45651	-0.441684	2.36152	-0.937447	-0.128145	0.640505	-0.996327	-0.210927	-0.128145	1.16729	-0.647829	0.402983	1.05744	1.03932	0.778367	1.62385	3.00765	-0.505594	1.48372	1.82103	3.24822
ENSG00000029639	TFB1M	transcription factor B1, mitochondrial [Source:HGNC Symbol;Acc:17037]	6	protein_coding	2.18941	2.1691	2.6074	2.17499	3.09521	2.20562	2.10376	2.67534	2.58599	2.09057	3.69277	2.79536	1.95329	2.83472	2.14329	1.86611	2.24209	2.64738	2.06661	2.11614	3.37295	2.74151	3.18794	1.97651	2.08184	3.00872	2.75259	2.36997	2.63437	1.96091	3.26723	3.14543	2.96802	2.33661	2.45778	2.68423	2.00209	3.45416	2.89445	2.38948
ENSG00000029725	RABEP1	rabaptin, RAB GTPase binding effector protein 1 [Source:HGNC Symbol;Acc:17677]	17	protein_coding	4.92011	4.60081	5.35381	4.91238	5.22112	5.1881	5.33464	5.2514	5.05563	5.26079	5.66096	5.81795	5.81935	6.19541	6.59041	6.57289	7.20016	6.49366	6.20182	6.02821	5.74926	5.75103	5.40122	6.20182	5.02887	5.43578	5.2739	6.46815	5.38492	6.02036	5.2458	6.12015	6.20303	5.82243	5.27111	5.7698	5.89476	5.19466	5.57837	5.71304
ENSG00000029993	HMGB3	high mobility group box 3 [Source:HGNC Symbol;Acc:5004]	X	protein_coding	5.72356	5.10322	5.9548	5.46442	4.5183	6.43529	5.51563	4.77077	5.16173	5.58471	5.51099	5.23211	2.6059	5.04719	2.80612	3.287	4.92613	2.64471	3.1622	2.29472	5.969	5.4361	6.75717	6.31915	5.36505	4.77077	5.88211	3.46208	4.95498	4.66295	6.39322	5.80599	3.04335	3.84425	6.94606	6.30657	5.62504	3.85527	3.94108	4.92453
ENSG00000030066	NUP160	nucleoporin 160kDa [Source:HGNC Symbol;Acc:18017]	11	protein_coding	5.79709	6.58677	6.38069	6.89557	6.01544	6.03823	5.89911	6.40739	6.89619	5.469	5.94043	6.51945	5.63124	6.06073	6.07793	5.94933	5.63477	5.99636	5.89193	5.89264	7.0927	6.6473	6.33257	5.72097	6.65388	5.70764	6.61419	5.73488	6.54566	5.331	6.70299	6.43303	6.23119	5.77171	6.46123	5.97194	5.3417	6.20433	5.91722	5.89193
ENSG00000030110	BAK1	BCL2-antagonist/killer 1 [Source:HGNC Symbol;Acc:949]	6	protein_coding	4.82265	5.44572	5.04289	5.08123	4.71875	6.33391	4.88864	5.09828	5.61726	5.13904	5.30136	4.2657	4.4148	4.72295	4.25955	3.78517	4.31404	4.19177	4.13045	4.17247	4.92769	5.61726	5.21446	4.4385	5.76462	5.13191	5.54222	4.80838	4.90289	4.36343	5.3874	5.34573	4.65747	4.08264	5.24008	4.43725	4.81538	4.39257	6.13314	5.84737
ENSG00000030419	IKZF2	IKAROS family zinc finger 2 (Helios) [Source:HGNC Symbol;Acc:13177]	2	protein_coding	5.94112	3.96074	4.18937	8.36434	4.53881	5.88211	4.81381	4.44828	5.15451	5.41345	5.72791	5.63742	3.81712	4.30082	5.26516	4.23416	4.69814	5.01589	4.56683	4.17417	4.04136	4.16829	4.35598	5.18256	5.0208	5.46268	4.9874	5.41477	3.32596	4.5889	3.77755	2.82891	5.61055	5.02612	3.07561	4.00613	4.79757	2.30981	4.94601	3.20376
ENSG00000030582	GRN	granulin [Source:HGNC Symbol;Acc:4601]	17	protein_coding	8.69424	7.85834	8.81126	7.68632	9.34208	9.98305	9.49854	8.88422	9.33036	8.77237	9.8334	9.61727	8.25758	8.34222	8.23734	8.69424	8.61027	8.99717	8.64809	8.21006	8.01689	8.46308	7.84802	9.47871	9.17641	8.72347	8.35878	8.8432	8.49057	8.70149	8.24742	8.286	8.23985	8.75713	8.07615	8.47522	8.00869	8.24995	9.85109	8.89258
ENSG00000031003	FAM13B	family with sequence similarity 13, member B [Source:HGNC Symbol;Acc:1335]	5	protein_coding	4.12143	4.08481	4.61731	4.91389	4.64881	4.40055	4.11814	5.0162	4.56976	4.59085	4.79538	4.52222	5.10988	5.71021	5.96441	5.64956	5.79318	5.58279	5.65056	5.91972	4.46886	4.31957	4.44013	5.0114	4.42529	4.79538	4.66968	5.47006	4.41771	4.63564	4.08942	5.34887	5.52206	4.7614	4.45531	4.51995	4.61375	4.95832	4.79021	4.54123
ENSG00000031081	ARHGAP31	Rho GTPase activating protein 31 [Source:HGNC Symbol;Acc:29216]	3	protein_coding	5.85251	6.05412	5.78453	5.40309	6.30312	5.45624	5.58279	6.35081	5.73655	5.59653	5.91238	5.99383	7.14866	5.61993	5.66657	6.37043	5.20903	6.5637	5.84174	6.60797	4.5078	4.74129	5.44401	5.79355	5.99818	5.6731	6.75656	6.33597	6.46663	5.62504	4.42694	4.95984	6.15763	5.94425	3.21023	5.04456	5.03684	6.46032	6.83052	5.67374
ENSG00000031691	CENPQ	centromere protein Q [Source:HGNC Symbol;Acc:21347]	6	protein_coding	2.4509	2.86249	2.15091	2.57174	2.24652	2.35029	2.15321	1.59104	3.9845	0.833085	2.5059	2.00381	2.45511	1.99618	0.816275	0.751064	1.6559	1.4947	1.65691	1.61123	3.12745	2.74381	3.08674	1.31193	3.3846	1.87349	2.55773	1.76148	3.79073	1.92477	2.88314	3.4476	1.84893	1.10609	4.08561	1.19923	2.81762	3.40167	2.15163	2.9438
ENSG00000031698	SARS	seryl-tRNA synthetase [Source:HGNC Symbol;Acc:10537]	1	protein_coding	6.84189	7.11208	6.19816	6.95089	6.27226	6.93094	6.67095	6.69851	6.10317	6.94883	6.4207	6.42892	6.45199	6.26881	6.58987	6.67905	6.7859	6.74996	6.70694	6.67591	6.07411	7.22709	6.29365	6.77213	6.50487	6.59766	7.02123	6.63408	6.83427	6.44081	6.00729	6.62864	6.88368	6.6468	6.99108	5.85617	6.60337	7.14298	6.7899	6.95089
ENSG00000031823	RANBP3	RAN binding protein 3 [Source:HGNC Symbol;Acc:9850]	19	protein_coding	5.25919	5.21828	4.97439	5.62504	5.10644	5.15322	5.29054	4.74862	5.34067	4.74161	5.07603	5.48909	5.09323	4.97619	5.28735	5.0239	4.97501	5.00661	5.09793	5.07505	5.64956	5.39643	5.40962	4.89055	4.95236	5.10486	5.93388	5.15602	5.44537	4.4873	5.75458	5.50672	5.07669	5.13673	5.69506	5.36059	5.23975	5.38999	5.40702	5.16983
ENSG00000032219	ARID4A	AT rich interactive domain 4A (RBP1-like) [Source:HGNC Symbol;Acc:9885]	14	protein_coding	4.39685	3.62006	3.6945	3.71848	4.39423	3.85894	4.0282	4.03123	3.85288	4.32023	4.61924	4.32023	4.61375	4.78414	4.78826	4.73582	4.4957	4.92953	4.7614	4.62245	3.84503	4.34532	3.95016	4.92422	4.94722	4.18512	3.57629	5.00321	4.11458	4.3104	3.83514	4.34864	4.93561	4.75909	4.33083	3.59785	4.24977	4.0966	4.70241	4.05151
ENSG00000032389	TSSC1	tumor suppressing subtransferable candidate 1 [Source:HGNC Symbol;Acc:12383]	2	protein_coding	3.42602	4.16221	3.67352	3.82346	4.06441	4.4755	4.53881	2.97122	3.61863	4.26803	3.99377	3.67991	3.1418	3.21569	3.10857	2.47376	3.92429	2.62739	3.07722	2.53466	5.22477	4.73966	4.79443	3.41703	4.01409	4.9886	4.43474	2.96042	5.02019	3.37716	4.5476	4.61891	3.08843	3.21821	5.96009	5.20061	4.75115	3.64051	3.84348	4.03951
ENSG00000032444	PNPLA6	patatin-like phospholipase domain containing 6 [Source:HGNC Symbol;Acc:16268]	19	protein_coding	5.97759	6.93439	6.52344	5.86295	6.53915	6.43124	6.67216	6.09747	6.61627	6.03823	6.67969	5.62026	6.12359	6.19216	6.29056	6.37318	6.00495	6.46273	6.11382	6.09129	6.90466	6.28713	5.5257	6.18265	5.93636	5.8709	9.09105	6.31271	6.42441	5.62467	7.21528	6.05826	6.51945	5.82528	5.87633	6.36744	5.6964	6.28964	6.86643	6.75717
ENSG00000032742	IFT88	intraflagellar transport 88 homolog (Chlamydomonas) [Source:HGNC Symbol;Acc:20606]	13	protein_coding	1.66181	2.4793	2.45706	3.16069	2.18377	2.82053	3.62437	2.33661	2.32461	2.9174	2.44522	2.47663	3.42689	2.99592	3.32917	2.80671	3.71337	2.7024	3.17169	2.94491	3.32917	2.8682	3.39116	2.81701	2.21347	3.07935	2.2794	3.07561	4.24896	2.55833	2.22323	3.55397	2.89277	3.07343	3.02659	3.01805	3.43044	3.15493	2.19182	1.54907
ENSG00000033011	ALG1	ALG1, chitobiosyldiphosphodolichol beta-mannosyltransferase [Source:HGNC Symbol;Acc:18294]	16	protein_coding	4.66137	3.91351	4.77741	4.4625	4.1376	4.87571	4.2667	4.25012	4.02285	3.5367	4.1022	3.75593	4.00954	4.14576	3.13969	3.62782	3.90699	3.26113	2.42167	3.61723	4.42499	3.79263	4.263	3.81096	4.0957	4.94167	3.69361	3.56442	4.29656	4.6931	3.58326	3.81908	3.8458	3.65885	4.71808	3.53122	4.68925	3.54359	4.28709	3.76168
ENSG00000033030	ZCCHC8	zinc finger, CCHC domain containing 8 [Source:HGNC Symbol;Acc:25265]	12	protein_coding	4.72461	4.17383	4.35436	4.83031	4.43053	4.74733	4.62959	4.54955	5.04493	4.37144	4.33083	4.20968	4.49639	4.94693	5.332	5.24042	4.88415	5.44643	5.08719	5.25269	4.74768	4.81695	4.2667	4.92355	4.85169	4.29656	5.03844	5.14957	5.04289	4.53509	5.04187	5.16433	4.98647	5.01989	4.85261	4.00396	4.22161	4.73551	4.88926	4.30185
ENSG00000033050	ABCF2	ATP-binding cassette, sub-family F (GCN20), member 2 [Source:HGNC Symbol;Acc:71]	7	protein_coding	4.96757	6.6058	6.46522	6.86577	6.15045	6.28033	6.29313	6.41892	6.04458	6.45015	6.18344	6.48062	5.75248	5.95117	6.01073	5.51035	5.43544	5.57771	5.73787	5.97835	7.17507	5.61661	4.8593	6.23722	6.01963	5.69842	6.67325	5.90555	6.7836	6.1998	6.93997	6.13558	6.21193	5.88211	6.00116	6.58248	5.69334	5.71375	5.57426	6.43213
ENSG00000033100	CHPF2	chondroitin polymerizing factor 2 [Source:HGNC Symbol;Acc:29270]	7	protein_coding	5.61959	7.7186	7.25231	8.59009	7.2551	7.09046	7.10012	7.34559	7.52515	7.73566	7.22542	6.85965	6.50197	6.8145	6.91881	6.88685	6.79785	6.82164	6.8145	6.6007	6.40245	6.83241	6.00192	6.71892	6.94812	6.57993	7.72479	7.20724	6.77036	7.00229	6.29755	6.70188	6.94433	7.10652	6.86144	6.7859	6.25886	6.7948	7.65973	8.49057
ENSG00000033170	FUT8	fucosyltransferase 8 (alpha (1,6) fucosyltransferase) [Source:HGNC Symbol;Acc:4019]	14	protein_coding	6.66938	4.28916	5.06201	5.09262	5.22732	6.33556	5.37646	5.21608	5.79433	5.7003	5.59369	5.61693	5.07939	5.45902	5.02643	5.71724	6.06906	5.08435	4.68958	4.91788	4.79602	4.97082	5.09936	6.11688	6.21363	4.87252	5.94217	5.63054	4.82893	4.67737	5.51737	5.08527	5.32772	4.90692	5.20607	5.11051	6.07874	4.2518	6.92027	5.11936
ENSG00000033178	UBA6	ubiquitin-like modifier activating enzyme 6 [Source:HGNC Symbol;Acc:25581]	4	protein_coding	6.07335	6.38404	5.89583	6.85656	6.11135	6.68146	6.40379	6.31356	6.51451	6.84953	6.80774	5.77702	5.43771	5.6919	6.06617	5.82381	5.7472	5.93352	5.56872	5.8207	6.1094	6.33173	5.9002	6.6147	6.22667	6.16629	5.78846	6.09819	6.44697	5.82671	6.83817	5.96403	6.20777	6.78185	6.43074	6.40962	6.31832	6.27185	6.37448	6.22365
ENSG00000033327	GAB2	GRB2-associated binding protein 2 [Source:HGNC Symbol;Acc:14458]	11	protein_coding	6.52393	5.13837	6.07677	6.20646	5.47914	4.51571	4.32695	5.93527	4.51403	4.91633	6.16584	5.14666	6.25844	5.21768	5.23471	5.20221	5.86519	5.28211	5.61019	5.53755	5.10486	5.28988	6.35512	4.59667	5.2267	4.25347	5.91682	5.14991	4.40372	4.96922	6.18776	5.09995	5.42953	5.72464	4.52123	5.7465	5.66759	4.17663	5.23245	5.27203
ENSG00000033627	ATP6V0A1	ATPase, H+ transporting, lysosomal V0 subunit a1 [Source:HGNC Symbol;Acc:865]	17	protein_coding	5.22732	5.4203	5.39415	4.37972	6.17657	5.59193	6.01544	5.37056	5.33805	5.65913	6.06982	5.7404	5.82348	6.06945	6.47483	6.10237	6.04845	6.17378	6.27266	6.39024	4.96658	5.18484	5.32741	5.65056	5.13443	4.84011	4.92166	5.61165	5.6547	6.08675	5.93172	5.51332	5.36092	5.68572	6.05062	5.8739	5.37348	5.19105	5.96329	5.56775
ENSG00000033800	PIAS1	protein inhibitor of activated STAT, 1 [Source:HGNC Symbol;Acc:2752]	15	protein_coding	4.01372	4.05805	3.9403	3.78918	3.98116	4.49959	4.42074	3.72138	4.18335	4.21863	4.08561	3.9097	4.02963	4.32246	4.32023	4.03451	4.25415	4.35973	4.60247	3.97543	4.31439	4.69341	4.03082	4.50585	4.46096	4.48569	3.61815	4.47965	4.57956	5.11348	3.92127	4.70847	4.72327	4.45227	4.3624	3.48245	4.19827	4.27993	5.0875	4.58278
ENSG00000033867	SLC4A7	solute carrier family 4, sodium bicarbonate cotransporter, member 7 [Source:HGNC Symbol;Acc:11033]	3	protein_coding	5.94967	5.70694	5.69571	6.05412	5.43641	5.56436	5.95082	6.28275	5.39447	5.13643	5.83743	5.52108	4.83217	6.45199	6.16365	5.92475	8.03979	6.71496	6.18503	6.70754	4.66585	5.65056	6.89173	5.94077	6.07564	5.38679	5.20507	6.32687	4.90692	5.4186	5.62774	5.43544	5.85652	5.71304	4.66137	6.61577	6.04607	4.59795	5.7134	4.80231
ENSG00000034053	APBA2	amyloid beta (A4) precursor protein-binding, family A, member 2 [Source:HGNC Symbol;Acc:579]	15	protein_coding	2.08184	2.31693	4.54373	3.96038	4.39685	2.45986	4.30864	3.51546	4.1518	4.19212	3.57132	3.57132	0.836407	3.15493	2.67657	1.44599	2.04849	1.39426	1.16046	2.16825	5.81106	5.78813	5.73136	0.994893	1.70222	4.25855	4.37751	3.39734	5.61826	2.94153	5.64047	4.46565	3.20767	1.52004	3.97887	5.22442	2.23457	5.01204	3.67127	4.57043
ENSG00000034063	UHRF1	ubiquitin-like with PHD and ring finger domains 1 [Source:HGNC Symbol;Acc:12556]	19	processed_transcript	5.79218	5.83495	5.11479	6.88685	5.13064	5.97904	5.52636	4.66105	5.19759	4.68958	5.41637	4.96922	0.226506	3.23857	2.7024	1.66685	3.02927	2.48454	1.26252	0.882359	6.54514	5.74238	6.47929	4.74799	5.95629	5.17999	5.89264	3.26562	6.68863	3.27315	6.71496	6.81334	3.61815	4.574	6.21622	5.99345	6.08414	6.02073	4.43509	4.77801
ENSG00000034152	MAP2K3	mitogen-activated protein kinase kinase 3 [Source:HGNC Symbol;Acc:6843]	17	protein_coding	4.8182	6.34064	5.50326	4.18654	4.9084	5.27172	4.85698	5.23245	4.94365	5.01493	4.97746	5.34821	5.22112	5.36337	5.99114	5.00161	5.45902	5.05179	5.7683	5.99456	8.59009	4.97184	5.35446	4.52222	4.66712	5.36795	5.09455	5.00097	5.78054	4.73646	4.45531	5.30486	5.14859	4.91946	5.57979	4.84075	5.52671	4.46321	5.67475	4.93561
ENSG00000034510	TMSB10	thymosin beta 10 [Source:HGNC Symbol;Acc:11879]	2	protein_coding	10.4947	9.33762	9.69287	9.7652	10.1438	9.57405	10.0767	9.82466	9.63201	10.3739	9.85109	9.12055	9.85109	9.47871	9.0527	9.0386	9.26769	9.30722	8.85946	9.0386	11.3227	11.9699	10.6879	10.9788	10.7274	11.0607	11.1195	10.5438	11.6957	10.6133	9.15073	10.9788	10.9531	11.0053	10.9035	10.6499	10.9531	11.0053	10.7686	11.5364
ENSG00000034533	ASTE1	asteroid homolog 1 (Drosophila) [Source:HGNC Symbol;Acc:25021]	3	protein_coding	3.88489	3.02769	3.18991	3.84122	3.0989	2.69478	3.11787	2.85471	3.16116	2.56738	3.26777	2.75007	3.50196	3.45693	3.42132	3.89535	3.65113	4.01629	3.73452	3.21174	2.63437	3.31055	3.36168	3.17671	3.47842	2.4197	3.17617	3.40963	3.91469	2.36295	2.7017	3.23291	3.14878	3.01519	3.30135	2.56675	3.4476	3.92049	3.20477	3.51593
ENSG00000034677	RNF19A	ring finger protein 19A, RBR E3 ubiquitin protein ligase [Source:HGNC Symbol;Acc:13432]	8	protein_coding	6.70409	7.46046	5.68893	6.19501	5.72752	5.81182	5.81315	6.16088	6.61526	6.35739	6.42806	7.33791	6.05717	5.95559	6.59924	5.90226	6.95379	6.47091	6.26545	6.48654	6.16128	6.82666	5.55704	6.54973	6.90011	8.08708	6.95508	6.47187	6.93439	6.07874	6.68307	4.94821	6.99711	6.70128	5.32802	5.1881	5.66591	6.27479	7.54675	6.55842
ENSG00000034693	PEX3	peroxisomal biogenesis factor 3 [Source:HGNC Symbol;Acc:8858]	6	protein_coding	3.50301	3.12007	3.60909	2.47512	4.05919	4.353	3.70862	3.78517	3.25403	3.96301	3.86628	2.75316	3.406	3.83834	3.92502	3.46259	3.76008	2.58913	3.97243	3.61089	4.03	3.0364	3.53338	3.32751	2.65116	3.86501	3.74876	3.17828	4.04212	4.45324	3.7452	4.04708	3.26777	2.96907	3.7395	3.38643	4.36275	3.72054	3.94603	4.62054
ENSG00000034713	GABARAPL2	GABA(A) receptor-associated protein-like 2 [Source:HGNC Symbol;Acc:13291]	16	protein_coding	6.26218	5.77285	5.08589	5.30741	5.74584	5.6057	5.09763	5.92009	5.76869	5.14634	5.38903	5.39674	6.03274	5.59127	5.79639	5.72134	6.06309	5.78846	5.77128	5.65881	4.75698	5.09107	5.014	5.17734	5.92966	5.35571	4.88895	5.66169	4.79222	5.14225	4.51503	5.07035	5.75682	5.47318	5.60432	5.61626	5.39382	4.61505	5.40829	4.54864
ENSG00000035115	SH3YL1	SH3 and SYLF domain containing 1 [Source:HGNC Symbol;Acc:29546]	2	protein_coding	6.44697	6.00885	5.54088	4.08599	5.54944	3.4877	5.1387	5.6057	4.30864	5.43307	5.03999	5.76285	3.93913	5.62985	5.10127	5.37189	5.49008	4.92319	5.23504	5.36727	5.99973	6.18657	6.3256	4.263	3.85327	5.79468	5.26614	5.41447	5.04873	5.79468	5.03748	6.17696	4.40018	5.58083	5.25855	7.26075	4.76005	5.64144	4.51601	4.18687
ENSG00000035141	FAM136A	family with sequence similarity 136, member A [Source:HGNC Symbol;Acc:25911]	2	protein_coding	6.54417	6.68021	5.97724	6.01465	6.33215	5.39709	6.00046	5.67577	6.23881	5.41193	5.74106	6.02656	4.60988	5.3125	5.47382	5.01953	5.1577	5.21676	4.88259	4.73079	7.3479	6.37663	5.56051	5.21676	5.79318	6.06148	6.96882	5.64572	6.86516	6.17862	6.47483	6.47778	6.02431	5.39991	7.30936	6.98317	6.22841	5.58954	5.90192	6.36697
ENSG00000035403	VCL	vinculin [Source:HGNC Symbol;Acc:12665]	10	protein_coding	6.04929	7.44552	8.36714	7.86212	8.66565	7.5915	7.24457	8.26014	7.77876	8.18821	7.80354	7.31347	7.75777	8.10257	7.98845	7.68342	7.2551	7.47106	8.11828	7.98845	6.53767	6.75242	7.82042	7.22624	7.50039	7.6426	8.12281	7.5875	6.91394	7.27056	6.62503	7.46046	7.49426	8.12508	6.57505	9.70069	7.89091	7.58105	6.94685	7.26856
ENSG00000035499	DEPDC1B	DEP domain containing 1B [Source:HGNC Symbol;Acc:24902]	5	protein_coding	3.09521	3.98116	2.31343	3.54043	2.08813	2.65175	1.85958	0.795162	2.3793	0.384048	1.07321	2.61374	-0.624961	-0.444698	-0.718292	-1.159	-1.22626	-1.20058	-1.4384	-2.38023	4.24132	2.85059	3.43093	2.03128	3.15388	1.30246	2.23306	-0.862526	3.67907	1.04611	3.60511	4.0406	-0.21421	0.173024	3.8862	3.49196	2.77318	2.71838	1.98921	1.50988
ENSG00000035664	DAPK2	death-associated protein kinase 2 [Source:HGNC Symbol;Acc:2675]	15	protein_coding	3.98563	3.51546	3.05275	0.366873	0.480555	3.23913	2.32751	2.7545	3.49241	0.927667	3.50764	1.83438	4.43787	3.03523	3.13279	2.70873	3.40874	3.23086	3.16851	3.69074	2.37215	5.34729	5.17339	2.54232	3.63248	1.92132	3.77179	2.90149	1.52218	2.64802	2.56675	4.42663	2.64738	3.18193	5.5474	3.19601	3.74716	2.65057	4.54498	4.24756
ENSG00000035681	NSMAF	neutral sphingomyelinase (N-SMase) activation associated factor [Source:HGNC Symbol;Acc:8017]	8	protein_coding	4.89842	5.6057	5.14603	4.99206	4.97883	5.37579	4.25547	4.72984	4.14851	4.2979	5.24944	5.51367	4.86155	4.45395	4.49254	4.42859	4.28709	4.60181	4.52383	4.54403	4.86698	4.62927	3.88581	4.11708	3.73192	4.12896	5.08904	4.72358	3.85855	4.72327	5.43177	4.70913	5.26451	4.23862	4.89542	4.4148	3.89775	5.2937	4.85991	4.77741
ENSG00000035687	ADSS	adenylosuccinate synthase [Source:HGNC Symbol;Acc:292]	1	protein_coding	4.87221	6.35928	6.4861	5.03246	5.30646	5.84702	6.29268	5.49111	5.87321	6.47483	5.73062	6.19253	4.68891	5.89404	5.14356	5.28245	5.61235	5.22605	5.38999	5.20474	6.29617	6.12877	6.15441	6.24047	6.25508	6.02942	6.57232	5.45454	6.61939	6.44785	6.73321	5.33742	5.99598	5.66691	5.99937	6.19623	5.97228	6.03553	5.55443	5.34917
ENSG00000035720	STAP1	signal transducing adaptor family member 1 [Source:HGNC Symbol;Acc:24133]	4	protein_coding	-0.722207	-0.551249	-3.45671	-0.982138	0.575652	1.06909	-1.54036	-1.45059	1.43171	-0.903453	0.76473	0.173024	-3.2473	-4.14623	-3.29034	-0.696245	-3.1487	-1.22626	-0.251029	-1.99535	-0.761069	0.119112	-0.336624	-2.636	-0.162563	-2.22457	-1.83976	2.75922	1.27686	-0.220045	0.213361	-1.32972	2.23994	-1.07787	-2.49148	-4.09933	-1.72575	-3.88353	2.28975	-1.16425
ENSG00000035862	TIMP2	TIMP metallopeptidase inhibitor 2 [Source:HGNC Symbol;Acc:11821]	17	protein_coding	5.98877	7.91458	7.98445	9.96325	9.72448	7.0037	8.78779	8.59009	7.51896	8.42439	8.57022	8.07615	8.83916	7.55922	7.79854	8.28079	7.21912	8.19545	8.83916	8.36156	5.22079	8.03559	8.43617	7.76902	7.54298	9.1406	8.86355	8.71978	6.70299	7.3339	7.7755	8.75335	7.2733	7.7755	5.27421	8.19062	8.24237	8.81521	7.13689	9.16094
ENSG00000035928	RFC1	replication factor C (activator 1) 1, 145kDa [Source:HGNC Symbol;Acc:9969]	4	protein_coding	6.23569	5.24944	5.605	6.19741	5.64749	6.04571	5.01752	5.92227	6.33726	5.16109	5.58376	5.21798	5.82036	5.91017	5.82746	5.87737	5.68994	5.84382	5.969	5.57706	5.84174	4.94331	6.51754	5.46934	6.15516	5.22538	5.63808	5.83359	6.48516	5.2498	5.73655	6.32351	5.6424	4.92862	6.28753	6.19293	4.87603	6.05569	5.79029	5.95002
ENSG00000036054	TBC1D23	TBC1 domain family, member 23 [Source:HGNC Symbol;Acc:25622]	3	protein_coding	5.08278	5.81757	5.34887	5.78991	5.37579	5.84602	4.95144	5.27327	5.23944	4.61891	5.71375	5.74584	5.39296	5.11869	4.98516	4.85386	5.13673	4.89183	5.02979	5.09107	4.82517	6.14438	4.12179	4.93591	5.83604	5.18129	5.95153	5.0967	5.73455	5.13253	4.64623	4.85011	4.92643	5.15226	5.97724	5.06814	6.197	5.73029	5.45902	6.35694
ENSG00000036257	CUL3	cullin 3 [Source:HGNC Symbol;Acc:2553]	2	protein_coding	5.62708	5.20838	5.23741	5.86332	4.963	5.40797	5.88919	5.62774	5.42855	5.56904	5.45624	5.87965	5.53011	5.9146	5.7359	5.80071	5.97118	5.50768	5.83027	5.64572	5.88841	5.9664	6.04689	5.46771	5.98491	6.16166	5.83777	5.7243	6.1897	5.73391	5.8852	6.09855	5.81388	5.59331	5.99456	5.44272	5.91238	5.28245	5.60641	5.6397
ENSG00000036448	MYOM2	myomesin 2 [Source:HGNC Symbol;Acc:7614]	8	protein_coding	-0.185086	-1.14884	-1.23659	1.18815	-0.825923	-1.87909	-1.25113	-0.131824	-2.71915	-2.79053	-0.320671	-1.33999	1.70938	-0.435182	-0.110493	0.0440331	-0.355571	0.720055	3.05382	0.803235	-1.13787	-1.04542	-1.55316	3.20065	-1.37905	-1.14382	-1.56014	-1.20058	-1.39701	-2.17046	-1.42199	1.81368	-0.841594	-1.42745	-0.0908834	0.0366371	-1.22626	1.29336	-1.20058	-2.04984
ENSG00000036530	CYP46A1	cytochrome P450, family 46, subfamily A, polypeptide 1 [Source:HGNC Symbol;Acc:2641]	14	protein_coding	1.70126	-1.57895	-0.683566	-0.0829597	0.242712	-2.22457	-1.22626	-2.40138	-1.20583	0.133565	-2.07924	0.0293283	2.72451	0.880802	0.155684	-0.0101143	-0.115787	-0.202506	0.128887	1.80631	-0.38477	-1.19502	-1.24632	0.472405	-1.04957	0.371032	-0.680082	-1.23659	-0.912819	-0.858207	-1.08714	0.0918104	-0.0101143	1.46869	1.64405	2.88256	-0.0175886	2.39976	-1.69266	1.62892
ENSG00000036549	ZZZ3	zinc finger, ZZ-type containing 3 [Source:HGNC Symbol;Acc:24523]	1	protein_coding	5.49557	5.5181	5.28412	5.85544	5.07866	5.5019	5.69378	5.64472	5.72714	5.0592	5.33499	5.80037	4.97309	5.91532	5.79176	5.69157	5.76462	5.5892	5.6624	5.40962	6.32224	5.76104	5.90872	6.00342	5.56709	5.2498	5.80783	5.60812	6.1512	5.84737	6.07677	5.46476	5.92808	5.80071	4.70049	5.76676	5.28925	6.47336	5.37056	5.91085
ENSG00000036672	USP2	ubiquitin specific peptidase 2 [Source:HGNC Symbol;Acc:12618]	11	protein_coding	3.01925	3.26113	1.48143	2.15401	2.93459	-0.441684	-1.02771	0.917994	2.27152	-0.891104	0.168485	1.97733	2.38144	2.3381	2.69417	1.34693	1.97976	2.54358	3.00711	3.83389	2.42298	2.06969	0.615162	-0.444698	1.92393	2.2905	2.38948	-1.53454	1.16313	-1.76774	2.86079	2.82518	-0.119316	-0.153662	1.55549	2.38364	1.60811	2.82518	-0.525154	2.69054
ENSG00000037042	TUBG2	tubulin, gamma 2 [Source:HGNC Symbol;Acc:12419]	17	protein_coding	3.63207	3.69633	3.86544	4.00652	4.0957	2.95925	4.38755	3.81592	3.3855	2.98872	3.70904	3.40407	5.26952	4.61375	4.10184	4.47338	4.34692	4.81756	4.68093	4.77106	4.48474	3.1015	3.80588	4.97817	3.4698	3.81986	3.40963	4.41245	4.10998	3.48472	3.72947	3.79963	4.18756	4.55516	3.11889	4.30629	4.08076	5.30453	3.89294	4.60634
ENSG00000037241	RPL26L1	ribosomal protein L26-like 1 [Source:HGNC Symbol;Acc:17050]	5	protein_coding	3.11839	3.21668	3.32021	3.27686	3.71622	3.83871	4.24097	2.90149	3.37623	3.55667	2.84238	3.47515	3.09312	2.86878	2.79908	2.89161	3.1375	1.251	2.66813	2.54619	4.55133	4.4276	4.52909	3.50534	4.12478	4.67001	3.79503	3.02249	4.52715	3.42557	4.23177	4.5078	2.81106	2.9582	4.84982	3.93174	3.98382	4.37508	3.59355	4.53038
ENSG00000037280	FLT4	fms-related tyrosine kinase 4 [Source:HGNC Symbol;Acc:3767]	5	protein_coding	2.95925	3.45914	3.76411	2.46051	1.948	2.74763	3.60909	4.22833	2.9871	3.13126	3.46105	2.76628	5.7404	3.86544	3.45826	4.29588	3.68322	5.28475	5.02547	4.80942	1.77841	2.93337	2.86134	3.80427	2.61374	3.87136	2.566	3.5909	3.59312	3.57365	2.21026	3.05325	3.91084	4.42632	4.97686	3.48561	3.69155	3.57459	3.01519	2.67468
ENSG00000037474	NSUN2	NOP2/Sun RNA methyltransferase family, member 2 [Source:HGNC Symbol;Acc:25994]	5	protein_coding	6.0374	7.54558	7.21076	6.54468	6.11382	6.58677	6.45985	6.60021	6.53915	6.96542	6.10977	6.23569	5.86222	6.48902	6.34064	6.1512	5.90872	5.85215	6.89297	6.41599	6.91394	7.26472	6.39322	7.32977	6.69077	7.29737	7.02455	6.43617	6.35081	7.42949	6.6743	6.28456	6.87434	6.60385	6.9113	6.66219	6.80651	6.5087	6.45568	6.29755
ENSG00000037637	FBXO42	F-box protein 42 [Source:HGNC Symbol;Acc:29249]	1	protein_coding	6.02942	5.02855	4.46565	5.39415	4.60536	4.74768	5.10612	4.69723	4.19383	5.15926	4.78122	5.03369	5.44802	5.03552	5.0075	4.9889	5.19696	5.05721	5.16855	5.33429	5.05179	4.50816	4.83757	4.97589	4.40984	4.66137	4.27853	4.74346	4.55711	4.39921	5.02947	5.1403	4.97501	5.01015	4.9142	3.81592	5.0592	5.94005	4.73175	5.46268
ENSG00000037749	MFAP3	microfibrillar-associated protein 3 [Source:HGNC Symbol;Acc:7034]	5	protein_coding	4.40917	4.61053	4.61053	4.82731	5.05951	5.42558	5.55538	5.1574	4.82232	4.97883	4.93561	4.76561	5.66691	5.13158	5.13509	5.27452	5.26114	5.12418	5.01849	5.0569	4.88864	5.31059	5.43975	4.9283	5.06754	5.61339	4.75878	4.89388	5.29502	4.33548	4.6931	5.52206	4.942	4.66744	6.02899	4.17383	5.02794	4.79285	4.8928	5.62985
ENSG00000037757	MRI1	methylthioribose-1-phosphate isomerase 1 [Source:HGNC Symbol;Acc:28469]	19	protein_coding	5.97046	5.35605	4.91887	5.35112	5.32865	4.56555	4.942	5.01431	4.85386	4.97817	5.78312	5.16173	5.36195	5.03844	4.81976	5.2786	5.02643	5.40248	5.39789	5.5181	5.43848	2.33103	5.43238	5.76943	4.86382	4.27821	5.32087	4.87634	4.10323	4.94331	5.79284	5.20872	5.16983	5.33968	0.93907	6.43074	5.34887	6.00081	4.60215	6.22624
ENSG00000037897	METTL1	methyltransferase like 1 [Source:HGNC Symbol;Acc:7030]	12	protein_coding	4.81476	4.11529	4.51008	4.88987	4.19616	4.71936	4.57718	4.30864	3.63425	4.88385	3.47888	4.42173	3.74963	3.77886	3.65072	4.02321	3.93838	3.68976	3.97428	4.5262	4.652	3.59179	3.53487	4.78603	4.2518	4.67359	4.15853	3.57415	4.50515	3.99813	4.14711	3.94809	3.58371	4.22194	3.39062	3.99183	4.76369	3.58019	4.00396	4.23628
ENSG00000037965	HOXC8	homeobox C8 [Source:HGNC Symbol;Acc:5129]	12	protein_coding	1.24098	2.12233	2.18011	3.6481	2.65616	0.874097	2.64098	2.99043	2.64738	4.13869	2.66973	2.84997	2.27152	1.20684	2.20941	1.20961	1.8784	2.07044	2.57707	0.466352	0.752755	2.18085	1.51794	2.34369	2.91249	2.72948	2.82053	3.39408	1.53604	3.92316	3.41199	2.87833	1.85246	4.89878	2.63958	3.10313	3.49241	3.38089	0.684193	2.11115
ENSG00000038002	AGA	aspartylglucosaminidase [Source:HGNC Symbol;Acc:318]	4	protein_coding	3.91387	4.37816	3.81592	4.0606	4.18512	4.79979	4.84137	4.37879	4.75629	4.54828	3.98706	4.58728	4.49925	4.199	4.2331	4.19753	4.79117	4.54698	5.03431	4.36517	4.28642	4.06867	5.5728	4.62086	4.86664	5.30326	4.40803	4.56231	4.08115	4.50392	3.26163	3.90268	4.57307	4.31178	4.54373	5.35537	3.25403	3.66218	4.99357	3.37623
ENSG00000038210	PI4K2B	phosphatidylinositol 4-kinase type 2 beta [Source:HGNC Symbol;Acc:18215]	4	protein_coding	6.65006	4.91326	4.59795	4.21758	4.61087	5.67475	4.3189	4.86448	5.64885	5.22349	4.98831	4.32246	3.83158	3.85405	4.20862	4.1361	4.156	4.43379	4.19314	3.88537	5.16079	4.83636	3.76947	3.986	5.62369	4.18687	4.57432	4.4064	4.59987	4.20829	5.22538	4.83666	4.48987	4.31306	5.30584	4.12478	3.9395	4.24417	5.147	3.88218
ENSG00000038219	BOD1L1	biorientation of chromosomes in cell division 1-like 1 [Source:HGNC Symbol;Acc:31792]	4	protein_coding	7.01738	5.45035	6.19253	6.38712	6.45477	6.41692	5.8518	6.78931	6.15721	6.33813	6.38892	5.38565	6.46912	6.76248	6.99179	6.88169	6.66434	6.97982	6.71949	6.89557	6.28881	5.77524	6.15157	6.51754	6.06751	6.1818	6.23119	7.57097	6.58248	6.41232	6.23445	6.92445	7.23192	6.90405	7.03195	6.42302	5.5453	6.92758	6.70128	6.56313
ENSG00000038274	MAT2B	methionine adenosyltransferase II, beta [Source:HGNC Symbol;Acc:6905]	5	protein_coding	4.79153	5.12707	5.39513	4.75244	5.64472	5.82528	5.9593	5.44771	5.71756	5.65022	5.92299	5.91273	5.73179	6.00962	6.03932	6.21781	6.11338	6.28793	6.20996	5.62129	4.8059	6.09129	5.16018	5.75682	5.35537	5.68506	5.01204	6.5185	5.97082	5.51066	5.19229	5.84207	6.38937	5.54155	5.14991	4.8059	5.21736	5.08435	6.53561	5.10677
ENSG00000038295	TLL1	tolloid-like 1 [Source:HGNC Symbol;Acc:11843]	4	protein_coding	1.47689	2.11196	3.03195	2.21559	3.29026	0.373474	2.7239	2.42167	0.177577	3.37716	2.6336	2.70495	4.36548	2.43772	2.28745	3.26014	2.6911	3.73622	3.00014	3.26723	1.82191	-0.624961	0.0973239	5.19361	3.30668	2.73629	2.24209	3.24679	1.93232	1.86425	-0.0938486	2.82289	3.43837	2.15987	-1.67862	1.69928	2.22628	4.90901	1.57178	5.63808
ENSG00000038358	EDC4	enhancer of mRNA decapping 4 [Source:HGNC Symbol;Acc:17157]	16	protein_coding	5.45902	5.99782	5.71788	6.57656	6.27739	6.36287	6.13603	6.27396	6.52042	5.92227	5.98125	6.27691	6.02311	6.20777	6.49656	6.43074	6.55171	6.522	6.54305	6.61419	6.24424	6.67851	6.89358	6.34998	6.33257	5.52139	5.72677	6.25011	6.43395	6.31532	6.14754	6.32915	6.59874	6.59516	6.48561	6.67216	5.8615	6.63025	6.3231	5.90125
ENSG00000038382	TRIO	trio Rho guanine nucleotide exchange factor [Source:HGNC Symbol;Acc:12303]	5	protein_coding	7.98845	9.77484	9.00171	8.52184	8.18102	7.84105	8.286	8.23985	8.57681	8.06103	8.0937	8.45404	7.9627	8.67274	8.2199	8.30445	8.69424	8.19303	8.05248	8.24237	7.86745	9.46566	8.4661	8.62047	8.54419	8.53137	9.09592	8.29388	7.6566	7.74824	8.50611	8.10928	8.25249	9.39622	8.58675	8.67987	8.51238	8.97916	7.79687	8.3983
ENSG00000038427	VCAN	versican [Source:HGNC Symbol;Acc:2464]	5	protein_coding	7.18037	7.90345	9.40238	9.91519	10.1554	8.15972	10.0552	10.4176	8.02724	10.203	9.74874	8.60014	7.92618	6.28414	6.86457	8.36714	7.01669	7.83068	7.29632	7.11045	8.64113	7.14619	10.1671	9.23475	11.2498	10.4477	9.9731	9.9731	8.22486	9.31873	7.82212	9.29013	8.79557	10.1671	6.19941	9.16094	9.41478	10.2916	8.41563	10.1671
ENSG00000038532	CLEC16A	C-type lectin domain family 16, member A [Source:HGNC Symbol;Acc:29013]	16	protein_coding	5.30741	4.79757	5.44433	5.60159	5.51035	5.99636	5.08093	5.22507	5.35506	5.50095	5.1226	4.72493	5.01989	5.47882	5.44863	5.1574	5.50224	5.33131	5.41193	5.28544	5.0576	5.13349	5.29502	5.00129	4.79475	5.40631	5.47144	5.49831	5.88555	5.6145	4.8182	5.36438	5.40439	5.35446	6.14911	5.92043	4.84552	5.27592	5.31773	4.487
ENSG00000038945	MSR1	macrophage scavenger receptor 1 [Source:HGNC Symbol;Acc:7376]	8	protein_coding	5.73423	6.46225	5.702	5.39957	7.36129	8.41273	7.30749	5.62541	6.48062	6.74707	7.46624	5.82785	5.1387	3.57543	4.13795	4.21332	3.65327	4.90259	4.12896	3.58459	5.66511	7.25145	5.62232	6.37135	6.82477	6.91256	6.37495	5.23842	4.75023	5.93316	6.26666	6.39509	4.75664	5.91682	3.53811	5.30422	6.41096	4.57242	8.14805	6.86333
ENSG00000039068	CDH1	cadherin 1, type 1, E-cadherin (epithelial) [Source:HGNC Symbol;Acc:1748]	16	protein_coding	7.88182	8.08646	7.92241	0.809683	6.95298	8.83916	8.09591	8.02516	8.55389	9.10081	6.79054	6.7138	4.95832	8.70513	8.34496	8.23483	8.83514	7.25807	8.02724	7.45241	7.65078	9.26214	8.49366	7.76258	7.96075	7.80858	7.69066	7.06639	7.85153	8.48441	7.59875	6.98186	7.76902	8.58343	7.88726	7.08716	8.6586	5.43085	7.46284	4.64818
ENSG00000039123	SKIV2L2	superkiller viralicidic activity 2-like 2 (S. cerevisiae) [Source:HGNC Symbol;Acc:18734]	5	protein_coding	4.96922	5.46268	5.35932	5.86858	5.51844	5.86115	5.3528	5.62912	5.36059	5.87929	5.10612	6.04128	5.53322	5.60604	5.61339	5.66312	5.76528	5.79536	5.69298	5.73655	6.13191	5.69955	5.23703	5.60744	5.61858	4.95326	5.4151	5.38771	6.03932	5.1754	5.91937	5.79176	5.77984	5.03246	5.6578	7.16747	5.48744	5.37284	5.64008	5.19759
ENSG00000039139	DNAH5	dynein, axonemal, heavy chain 5 [Source:HGNC Symbol;Acc:2950]	5	protein_coding	2.10025	5.6974	3.09521	-1.70624	-0.745432	-1.24632	4.57242	2.856	3.04435	3.9578	1.1686	6.02225	1.73169	4.49704	5.01885	4.58569	6.69077	3.43748	3.66574	3.77671	3.20767	4.67674	-0.122492	3.79111	0.401005	4.5782	4.22505	2.79599	2.99536	3.37062	2.79599	0.0341938	3.41703	6.17104	2.58851	2.87649	3.98007	1.70622	1.61861	0.655444
ENSG00000039319	ZFYVE16	zinc finger, FYVE domain containing 16 [Source:HGNC Symbol;Acc:20756]	5	protein_coding	5.14991	4.92042	5.331	6.93161	5.77448	5.75493	6.10013	5.76528	5.0478	5.86822	5.13705	5.13574	5.82819	5.41668	5.86733	5.9002	5.87565	5.88083	5.907	5.83849	5.03647	5.16402	5.35078	6.45294	5.59871	5.13126	5.41576	5.65945	5.40995	5.7113	4.8113	5.73291	5.40278	5.68474	5.66759	5.76943	4.68257	5.8228	5.52809	5.25603
ENSG00000039523	FAM65A	family with sequence similarity 65, member A [Source:HGNC Symbol;Acc:25836]	16	protein_coding	4.38893	4.85229	5.16885	6.50922	5.86936	5.36727	5.11645	5.62608	6.09705	6.00046	5.27683	5.49328	6.43574	5.46139	5.86822	5.71269	5.18356	6.36697	6.04725	5.92155	4.76005	5.07414	4.06329	6.01686	5.36092	5.53449	5.40056	6.24465	5.46206	5.37088	5.17242	5.3241	5.99561	5.67716	5.31578	5.34887	5.27203	5.55408	5.96938	5.9112
ENSG00000039537	C6	complement component 6 [Source:HGNC Symbol;Acc:1339]	5	protein_coding	-3.45671	-1.35047	-2.71915	-3.71354	-3.74512	-1.26548	0.063611	-1.68588	-2.04984	-1.14382	0.163364	-1.61912	3.17774	-1.39086	-1.25113	-0.342972	-1.35712	-0.903453	1.32881	-1.51433	-3.92648	-4.05566	-4.09933	-0.352689	3.75516	0.0808162	-0.688831	2.82343	-4.42507	0.984717	-3.53812	0.424053	0.426041	-0.358702	-2.537	-2.636	-3.92648	-4.49641	-0.655136	-1.54675
ENSG00000039560	RAI14	retinoic acid induced 14 [Source:HGNC Symbol;Acc:14873]	5	protein_coding	6.26501	8.96289	6.43662	4.92319	7.42592	5.3528	6.17257	6.41232	6.85077	6.07528	5.82599	5.5577	4.40277	6.2035	5.17273	4.46728	4.53539	4.88926	5.61305	4.70749	5.22112	6.71085	5.28544	6.51359	7.43952	6.74299	7.71864	6.23406	7.17507	4.95863	4.80136	6.2627	6.01724	5.61626	5.53585	6.53513	5.42329	6.35882	6.64422	7.19933
ENSG00000039650	PNKP	polynucleotide kinase 3'-phosphatase [Source:HGNC Symbol;Acc:9154]	19	protein_coding	5.23842	5.19197	4.49188	5.58886	5.12838	4.46002	4.4031	5.12063	5.29116	5.13253	4.79633	4.942	5.20607	4.71845	5.34305	5.0481	5.24774	5.67753	5.05531	5.34789	3.92988	4.57079	5.62608	5.28925	5.05498	4.18756	4.50973	5.65646	5.80634	5.17765	4.42437	5.02219	5.44334	5.69026	4.87822	5.64338	4.91268	5.26791	5.97157	4.97439
ENSG00000040199	PHLPP2	PH domain and leucine rich repeat protein phosphatase 2 [Source:HGNC Symbol;Acc:29149]	16	protein_coding	5.15451	4.73016	4.50223	4.59248	4.63507	4.99176	4.07619	4.1331	4.58216	4.4031	3.79662	3.89811	5.00289	4.5782	4.67932	4.74862	4.69217	4.27789	4.61119	5.17668	3.76985	4.43053	4.546	4.20308	4.32985	4.13193	3.99342	4.26964	4.46064	4.28883	3.45505	4.10908	4.49769	4.9111	4.48638	4.81946	4.41182	4.26335	4.16221	3.9038
ENSG00000040275	SPDL1	spindle apparatus coiled-coil protein 1 [Source:HGNC Symbol;Acc:26010]	5	protein_coding	4.00323	3.89848	4.15811	4.42304	4.62537	4.19866	4.27237	3.46004	3.89535	3.76008	3.16962	4.21369	3.2626	3.07935	3.06566	2.78452	2.70306	3.06834	1.75398	2.21193	4.73395	4.41348	4.36645	3.72338	3.95662	4.90629	4.02704	3.34706	4.85866	3.45781	4.59475	4.84328	3.5299	3.43093	5.06691	4.31144	3.90108	5.12224	3.69361	4.67422
ENSG00000040341	STAU2	staufen double-stranded RNA binding protein 2 [Source:HGNC Symbol;Acc:11371]	8	protein_coding	7.53443	5.25919	5.73423	4.67705	4.91664	6.02613	5.44367	5.03612	4.97339	4.68125	5.29116	6.12094	4.9886	5.1403	4.74448	4.56715	5.17307	4.76879	4.45059	4.51335	4.63121	6.21447	5.07243	5.20872	5.41606	5.40569	5.80566	5.25505	5.91644	5.56017	5.9002	6.07528	5.46511	4.30864	5.62467	4.91724	5.50969	5.07603	5.37646	5.4943
ENSG00000040487	PQLC2	PQ loop repeat containing 2 [Source:HGNC Symbol;Acc:26001]	1	protein_coding	4.37575	4.50483	3.47979	3.53164	3.56579	3.91387	3.65414	2.95982	3.09255	3.13801	3.09939	3.77062	3.64267	3.55443	2.98872	3.24222	3.69804	2.78629	3.31194	3.06348	3.83078	3.54043	3.70538	3.60015	3.29888	3.70822	3.60015	3.08043	3.65587	3.16693	4.09964	3.69236	2.9158	3.46624	4.58793	2.31047	3.64601	3.84907	3.66011	4.25449
ENSG00000040531	CTNS	cystinosin, lysosomal cystine transporter [Source:HGNC Symbol;Acc:2518]	17	protein_coding	3.59396	3.29026	3.06033	2.99536	4.03382	3.64601	3.2339	3.3096	3.15388	3.24968	3.67603	3.96546	3.75923	2.88661	3.17068	3.14878	3.24527	3.24726	3.19806	3.80823	3.46348	3.79339	3.84224	4.30218	3.29992	3.50764	3.37205	3.37667	4.02357	3.9337	3.66574	3.49695	3.34706	3.28494	4.03593	4.05043	3.23141	2.41907	4.03664	4.05278
ENSG00000040608	RTN4R	reticulon 4 receptor [Source:HGNC Symbol;Acc:18601]	22	protein_coding	1.82377	3.10044	1.04749	2.36769	0.392776	1.1686	1.90567	1.15649	2.28975	2.2663	2.72021	2.7386	0.242712	0.653513	0.927667	1.02467	1.5523	0.609315	0.533001	-1.32972	1.02192	4.28208	3.05221	1.41691	4.21827	2.76685	2.24066	0.146626	3.24581	-0.0125153	4.353	2.62476	-0.541482	0.837916	3.48156	2.10199	3.58371	1.76236	1.21233	2.55188
ENSG00000040633	PHF23	PHD finger protein 23 [Source:HGNC Symbol;Acc:28428]	17	protein_coding	4.63738	4.39257	4.8545	5.13064	4.8182	5.28605	5.10227	5.17145	4.94473	5.22409	4.81287	5.37839	4.4622	5.02219	5.17503	5.22957	5.72278	5.04719	5.01656	5.23211	5.0208	5.4203	5.45967	5.55984	5.36059	5.20738	5.35312	5.55408	5.71583	5.0406	5.26985	5.79572	5.60016	4.81317	5.66829	4.88926	5.01953	4.83282	5.20029	5.75357
ENSG00000040933	INPP4A	inositol polyphosphate-4-phosphatase, type I, 107kDa [Source:HGNC Symbol;Acc:6074]	2	protein_coding	5.05721	5.54188	5.73099	6.31751	5.75033	5.39068	5.46803	5.6536	6.05789	5.26857	5.8228	5.58814	5.0208	5.31125	5.40733	5.0075	4.80806	5.791	5.22477	5.15894	5.34305	5.34099	4.64592	5.83495	5.1614	4.86084	5.42821	5.80972	4.70049	4.89319	5.5288	4.74448	6.06	5.58149	4.626	5.88172	5.69026	5.90947	6.59974	5.88591
ENSG00000041353	RAB27B	RAB27B, member RAS oncogene family [Source:HGNC Symbol;Acc:9767]	18	protein_coding	4.49443	4.27853	4.38519	2.44522	1.01604	4.49799	6.45707	3.67476	2.70495	7.0592	2.89048	4.05953	2.62924	6.51309	5.42364	5.52911	5.96864	4.73395	5.17014	3.91084	3.80231	4.09013	3.82607	4.45698	2.59915	5.2786	3.18746	4.2911	3.88887	4.52779	4.43693	3.15759	5.19229	7.36419	1.88729	1.6479	4.55549	2.3821	1.89598	2.17322
ENSG00000041357	PSMA4	proteasome (prosome, macropain) subunit, alpha type, 4 [Source:HGNC Symbol;Acc:9533]	15	protein_coding	5.86401	6.93514	5.97228	6.66595	6.57136	7.60597	6.85211	5.94821	6.40336	6.40245	6.39686	6.4995	6.06577	5.63402	5.78744	5.90872	6.01503	6.03407	5.83567	5.73291	6.44829	7.51651	6.07018	6.3118	6.25345	6.40654	6.02942	6.23199	6.86397	6.37363	6.30064	6.44741	6.11892	6.36331	6.12877	6.16888	5.83208	5.93932	6.90152	6.69573
ENSG00000041515	MYO16	myosin XVI [Source:HGNC Symbol;Acc:29822]	13	protein_coding	-0.0677587	1.04881	1.27135	0.472405	-2.36915	0.292306	-0.0964117	-1.53454	-0.101669	-0.639129	0.0831023	-0.320671	2.81335	0.153273	-3.1487	-0.895407	-2.30649	-0.707412	-0.281754	0.629656	-1.30325	1.33477	0.825904	-1.32972	4.64269	1.21233	-0.817866	0.377685	2.5013	-1.15447	0.723382	0.495768	-0.340118	0.874097	0.761417	1.08343	-1.23113	-0.4012	1.78979	-2.32724
ENSG00000041802	LSG1	large 60S subunit nuclear export GTPase 1 [Source:HGNC Symbol;Acc:25652]	3	protein_coding	5.93932	6.00842	6.06751	7.02238	5.85428	5.84531	5.81712	6.31915	6.19856	5.24225	5.50734	5.8852	5.66797	5.86694	6.06538	5.47882	5.47178	5.96367	5.73099	6.15045	5.66591	5.96009	6.50726	5.782	5.82634	5.3623	5.96938	5.89583	6.79718	5.74008	5.86897	5.82449	5.84569	5.54771	7.46624	6.06416	6.74881	6.39024	5.67787	6.25261
ENSG00000041880	PARP3	poly (ADP-ribose) polymerase family, member 3 [Source:HGNC Symbol;Acc:273]	3	protein_coding	3.4639	3.42457	4.27044	3.12635	4.70913	3.54313	3.81096	3.58063	4.20308	3.39546	3.51361	3.99342	5.12418	4.50097	4.82962	4.60181	4.7295	4.72133	4.43279	4.61634	3.58326	4.1286	1.74014	4.63089	3.65711	5.08312	4.3507	4.62798	4.03	4.0077	4.73582	4.04743	4.4526	4.47338	2.75866	3.59872	4.12657	3.24378	4.49316	4.87665
ENSG00000041982	TNC	tenascin C [Source:HGNC Symbol;Acc:5318]	9	protein_coding	6.06831	7.58627	9.47871	10.6879	8.17388	5.7037	9.09592	9.04799	7.2128	10.3597	6.86643	8.88422	7.14619	7.78203	9.37187	8.33131	8.31245	8.286	7.84977	8.02932	4.65653	6.38847	9.04799	8.90946	9.46566	8.70149	10.5272	9.20261	9.10081	6.95443	4.71072	7.91865	9.37187	11.0607	5.91532	7.65078	9.07654	10.4477	7.85153	10.7898
ENSG00000041988	THAP3	THAP domain containing, apoptosis associated protein 3 [Source:HGNC Symbol;Acc:20855]	1	protein_coding	3.7029	3.97887	2.66753	3.68833	3.10261	2.84577	3.22975	2.80913	3.98116	3.13914	2.88601	3.60652	3.62354	3.17774	2.97355	3.07162	3.20113	3.14492	2.98484	2.91417	3.65456	3.39408	2.16291	2.79057	3.12745	2.27013	2.81577	3.055	3.7884	2.16825	3.55268	3.03523	2.76157	3.06244	3.61863	2.79353	3.27066	4.08481	3.12693	2.7081
ENSG00000042062	FAM65C	family with sequence similarity 65, member C [Source:HGNC Symbol;Acc:16168]	20	protein_coding	0.478185	1.98421	1.70938	1.10061	3.12364	1.74014	1.30002	2.0374	1.36356	0.93907	1.67078	2.20481	4.01556	0.9241	1.61958	2.71257	2.62542	3.79301	1.84069	3.52492	0.390518	-0.455057	0.833085	3.17721	1.32501	-0.0125153	1.83525	2.65679	2.49168	1.89947	0.613372	2.21713	3.03855	3.61089	-1.4384	0.556965	0.0682297	2.76933	1.46752	5.99028
ENSG00000042088	TDP1	tyrosyl-DNA phosphodiesterase 1 [Source:HGNC Symbol;Acc:18884]	14	protein_coding	4.96559	3.88335	4.02553	4.79757	3.62904	4.51078	3.93495	4.17591	4.39815	4.10794	4.62698	4.38859	3.49605	3.80823	3.92429	3.91764	3.73749	3.76539	3.48245	3.57365	4.92422	4.29554	4.34692	4.5399	4.41736	4.02963	4.01483	3.81869	3.88696	4.28276	4.95559	4.70946	4.23213	4.20658	4.34461	4.23862	3.72782	4.30629	4.25855	3.97727
ENSG00000042286	AIFM2	apoptosis-inducing factor, mitochondrion-associated, 2 [Source:HGNC Symbol;Acc:21411]	10	protein_coding	2.2443	3.91577	3.86936	3.84693	4.12441	3.46305	2.75623	2.96631	3.69713	3.61411	4.30082	3.19104	6.63833	4.04317	3.9124	3.77671	3.40012	3.49651	4.25657	4.81634	4.02053	4.54341	3.57132	3.27483	4.27887	3.20767	4.87952	4.08803	4.94917	4.57043	3.3124	3.3517	3.28593	5.48109	4.07582	5.40185	3.93532	3.36354	4.62568	5.58505
ENSG00000042317	SPATA7	spermatogenesis associated 7 [Source:HGNC Symbol;Acc:20423]	14	protein_coding	2.95324	1.27135	1.632	1.87541	2.09397	1.69928	1.81561	1.89598	0.312975	1.4001	1.56548	1.78317	2.55458	1.68528	2.48581	1.98601	2.37864	2.38798	1.76423	1.87266	2.85955	2.14179	1.47575	2.66753	2.9438	2.16607	2.22785	1.39426	0.478185	1.84804	2.0604	2.73065	1.42494	2.66693	2.64471	1.74516	2.30779	2.75007	1.0775	1.89067
ENSG00000042429	MED17	mediator complex subunit 17 [Source:HGNC Symbol;Acc:2375]	11	protein_coding	5.74483	5.28957	5.67243	5.80634	4.95175	5.03431	5.3039	5.76359	5.32802	5.41998	5.47747	5.41957	4.63121	5.61858	5.52777	5.76869	5.40929	5.57038	5.34979	5.41193	5.11902	5.10677	5.81073	5.95041	5.91644	4.95951	5.72791	5.28118	5.17433	5.20221	5.34067	5.6731	5.47479	6.03861	4.56096	5.55922	5.03581	5.59444	5.12937	4.73301
ENSG00000042445	RETSAT	retinol saturase (all-trans-retinol 13,14-reductase) [Source:HGNC Symbol;Acc:25991]	2	protein_coding	6.41692	6.20433	5.7465	5.07125	6.14994	5.99561	7.01738	6.12359	5.12158	7.63451	6.00532	6.34789	9.21858	6.10276	5.90519	6.40201	6.65549	6.77036	6.87503	7.44552	6.14398	6.45656	4.94754	6.92445	5.34432	6.09245	5.73423	6.3118	4.82265	7.91491	5.6782	5.50934	5.86401	6.92895	5.44678	5.0409	6.7138	4.83094	6.12245	5.0409
ENSG00000042493	CAPG	capping protein (actin filament), gelsolin-like [Source:HGNC Symbol;Acc:1474]	2	protein_coding	5.5288	8.23391	6.61627	6.34594	7.66986	7.59361	7.06162	6.53915	8.37556	7.85329	7.74665	7.7514	5.25982	6.56924	6.69182	6.33047	6.36871	6.96338	6.08945	5.61305	5.39893	7.72789	5.91238	7.45573	6.9073	6.48379	7.33189	6.82342	6.99335	6.48959	7.49787	6.8204	6.8003	6.48902	4.59859	6.42115	7.50529	5.71756	7.98046	7.10565
ENSG00000042753	AP2S1	adaptor-related protein complex 2, sigma 1 subunit [Source:HGNC Symbol;Acc:565]	19	protein_coding	6.51499	6.05826	5.57803	6.1005	5.9446	6.49751	6.07212	6.19816	6.05103	6.63833	5.4637	5.45072	5.7003	4.90009	5.17571	5.21221	5.51563	5.13221	5.38834	4.74991	5.16663	6.27943	6.11688	5.92854	5.75103	6.1512	5.42462	5.20443	6.04415	6.47974	5.366	6.35609	5.08404	5.83067	6.54008	6.23239	6.44552	5.34604	6.26706	6.93928
ENSG00000042832	TG	thyroglobulin [Source:HGNC Symbol;Acc:11764]	8	protein_coding	1.25863	1.47229	-1.41522	2.54358	0.917994	0.929471	1.40249	1.81456	0.979594	0.0193518	-0.220045	2.23076	0.126597	-2.29644	-1.40355	-0.596162	0.217837	-1.90926	-1.45059	0.153273	2.31864	0.579514	0.249382	-0.474573	-1.43296	-0.139898	0.501402	0.27467	1.21359	2.21713	-0.4012	2.09572	0.662839	2.55188	0.961679	1.14718	0.508917	2.34964	2.09485	4.48073
ENSG00000042980	ADAM28	ADAM metallopeptidase domain 28 [Source:HGNC Symbol;Acc:206]	8	protein_coding	3.20376	2.71713	2.46244	3.04941	2.95709	3.72906	3.5254	3.75923	4.04458	2.58014	4.97653	3.02354	1.87629	1.72803	3.10745	2.8682	2.20081	4.12756	3.29026	2.78452	2.65416	5.74483	2.45911	3.37344	3.17119	2.57894	3.4596	5.36092	2.38719	3.06623	2.87533	2.42039	5.31312	3.88407	3.50623	1.64311	2.4319	2.57546	5.55704	2.78993
ENSG00000043039	BARX2	BARX homeobox 2 [Source:HGNC Symbol;Acc:956]	11	protein_coding	3.84786	5.44678	4.10323	0.246973	-0.969431	-2.3378	2.69054	2.11115	2.91249	1.645	6.40201	5.07443	2.5013	4.03664	5.06907	3.96546	4.0535	3.95887	5.32639	4.61183	6.62976	3.25547	2.73243	2.70873	4.28675	3.63553	4.40607	2.82459	0.871007	3.07561	5.5923	5.47646	1.99266	1.44249	-0.703244	3.50534	4.1574	3.86544	1.64885	0.908421
ENSG00000043093	DCUN1D1	DCN1, defective in cullin neddylation 1, domain containing 1 [Source:HGNC Symbol;Acc:18184]	3	protein_coding	6.09855	5.67644	5.66312	6.29449	5.60368	5.59127	5.85251	5.78453	6.04292	4.77678	5.88378	6.12171	5.66895	5.3923	5.60538	5.18613	5.35047	5.13904	5.34855	5.41766	4.90752	5.90262	6.1818	5.08974	6.40149	5.48443	5.48942	5.22859	6.26666	5.56051	5.13774	5.31895	4.99513	5.36407	6.07717	5.80748	6.37751	5.4637	5.73255	5.85898
ENSG00000043143	JADE2	jade family PHD finger 2 [Source:HGNC Symbol;Acc:22984]	5	protein_coding	4.24652	5.94749	5.0484	4.55711	4.93341	4.91542	4.72061	5.517	5.60432	5.07183	5.64144	5.47006	5.86438	6.27943	6.49417	6.65665	6.41646	6.34289	6.61256	6.32915	2.64354	5.31609	3.71194	5.51844	5.33742	3.98007	4.17349	5.89689	5.33805	5.05721	3.44395	4.41865	6.28363	4.46665	5.07636	3.87306	4.15067	4.31243	5.96793	4.32763
ENSG00000043355	ZIC2	Zic family member 2 [Source:HGNC Symbol;Acc:12873]	13	protein_coding	2.66442	-0.85389	-2.11428	0.429821	-2.36915	-1.66391	0.756339	-3.71354	0.366873	3.11732	0.287995	2.17934	-0.822141	-2.23391	-3.43012	-1.96951	-3.33249	-1.91771	-0.0938486	-1.31844	0.233375	4.14816	2.23921	-3.33249	-3.48432	3.43608	-1.70624	-4.6566	4.53167	2.82576	-1.83147	-2.91602	-3.61956	-4.6566	7.43079	-2.27426	2.74095	2.5927	1.1486	1.12126
ENSG00000043462	LCP2	lymphocyte cytosolic protein 2 (SH2 domain containing leukocyte protein of 76kDa) [Source:HGNC Symbol;Acc:6529]	5	protein_coding	4.06024	3.77629	3.34941	3.20672	4.74287	5.36931	4.67001	4.68793	4.86633	4.40405	5.81281	4.16862	4.19348	2.41681	4.39685	4.39155	2.99319	5.18515	3.57273	3.92316	3.86415	4.76035	3.47842	5.05082	4.86764	4.07304	4.26803	5.84347	4.00246	4.21719	4.32478	4.59762	6.24921	5.07095	1.99454	3.62393	3.77179	3.1622	6.89681	5.49589
ENSG00000043514	TRIT1	tRNA isopentenyltransferase 1 [Source:HGNC Symbol;Acc:20286]	1	protein_coding	4.4095	4.75878	4.40341	4.43019	4.02053	3.38598	3.95363	4.13158	4.09694	3.39687	4.21536	3.54545	3.35672	4.2817	3.76284	3.9473	4.00846	3.00711	3.82261	3.4587	5.08246	4.57884	4.08228	4.07193	5.09732	3.53338	4.3176	3.35473	4.72752	3.37667	4.56522	4.0748	4.17483	3.71808	5.73688	3.17828	4.11921	5.02114	4.1567	4.67737
ENSG00000043591	ADRB1	adrenoceptor beta 1 [Source:HGNC Symbol;Acc:285]	10	protein_coding	0.517199	4.05082	2.56389	-1.38561	-1.02328	5.21641	-0.417279	-0.639129	-1.01418	-0.0881223	0.249382	-1.14884	3.28802	0.642193	0.0587703	0.633356	4.39091	1.43635	1.38603	1.89691	0.875803	0.396785	0.102003	-2.02371	0.600506	-0.722207	-0.0125153	1.22309	0.631508	3.11939	0.521161	-0.933024	-0.00498035	-1.56014	4.79979	0.0059225	-0.761069	-0.0990215	-1.14884	-0.195894
ENSG00000044090	CUL7	cullin 7 [Source:HGNC Symbol;Acc:21024]	6	protein_coding	6.27437	5.97531	6.25428	6.22624	6.76978	6.113	6.36697	6.40785	7.99247	5.78165	5.44802	5.9664	5.62504	6.39552	6.44502	6.44873	6.66938	6.53963	6.22542	6.24047	5.7113	5.51667	6.45707	6.03089	5.51563	6.46815	6.73209	6.45656	6.60846	6.28074	5.85793	6.81624	6.35882	6.95782	6.55076	5.03431	5.72315	7.53073	5.9002	6.98583
ENSG00000044115	CTNNA1	catenin (cadherin-associated protein), alpha 1, 102kDa [Source:HGNC Symbol;Acc:2509]	5	protein_coding	8.36156	8.29282	8.57351	7.64947	8.33403	9.35987	8.43913	8.12736	8.51868	9.13556	8.49057	8.96582	8.36156	8.55389	8.40405	8.21251	8.48749	8.21006	8.43913	8.33131	8.34771	9.17124	8.273	8.3983	8.64809	9.40238	7.87103	7.86745	8.36714	8.044	8.12054	9.26769	7.82554	7.81194	8.23985	8.12281	8.62732	7.98245	7.91304	8.08708
ENSG00000044446	PHKA2	phosphorylase kinase, alpha 2 (liver) [Source:HGNC Symbol;Acc:8926]	X	protein_coding	6.10819	4.5649	5.10612	6.05913	5.71304	4.78383	5.01047	5.14093	4.79979	4.57242	4.28978	4.97501	5.58604	5.37907	5.20804	5.32022	5.01692	5.25823	5.02794	5.17046	4.95742	4.07723	4.59827	5.12937	4.65297	4.80486	4.83314	4.60441	4.47934	5.33499	4.30899	4.80388	5.25362	6.3166	5.22477	5.52844	5.34855	5.876	4.97653	4.51467
ENSG00000044459	CNTLN	centlein, centrosomal protein [Source:HGNC Symbol;Acc:23432]	9	protein_coding	4.8713	3.93567	3.87343	4.91481	3.48561	3.09002	3.3987	2.69353	5.20347	2.39904	3.09002	3.406	4.15706	3.545	3.59136	2.68747	2.59536	3.68623	3.1096	3.41061	5.5308	5.58408	3.64683	4.18028	4.33245	3.42646	4.22904	3.42364	5.52108	2.85844	5.67787	2.82113	4.32763	3.42457	5.47351	5.54188	3.05435	5.73325	4.3199	1.5643
ENSG00000044524	EPHA3	EPH receptor A3 [Source:HGNC Symbol;Acc:3387]	3	protein_coding	1.87447	0.482443	1.59749	7.63993	3.96112	1.55996	3.99666	1.1351	3.21668	3.10261	2.43557	1.91608	3.92277	0.864192	3.2238	2.55188	2.61569	3.44943	2.09233	2.89161	1.4192	0.203239	1.19349	2.28821	2.8541	5.00445	1.01457	2.10533	1.91191	2.45639	0.7461	2.49932	2.59536	2.49295	2.85119	1.57871	4.45637	3.9878	4.06832	1.20824
ENSG00000044574	HSPA5	heat shock 70kDa protein 5 (glucose-regulated protein, 78kDa) [Source:HGNC Symbol;Acc:5238]	9	protein_coding	9.80736	9.83471	10.4477	10.3739	9.89651	10.5955	9.8334	9.66206	10.578	10.5108	10.0341	10.1097	8.69064	9.7165	9.25112	9.78189	9.9731	9.7406	9.56699	9.41478	11.0607	10.1909	9.66206	10.0237	10.3049	10.203	10.4631	9.65448	9.42103	10.0767	9.18683	9.00627	9.553	9.42731	10.4947	10.2916	10.3183	10.4176	10.4477	10.4947
ENSG00000046604	DSG2	desmoglein 2 [Source:HGNC Symbol;Acc:3049]	18	protein_coding	8.0335	9.38539	8.27818	6.23199	7.95685	6.09892	7.70341	7.9414	8.27042	8.47828	7.28861	8.88006	7.3446	8.18821	8.2627	7.3839	7.68342	7.53188	7.95685	7.51896	7.60745	8.8432	8.13421	7.22709	9.42103	8.04824	7.51651	6.86457	7.72171	6.6754	9.09105	8.69424	8.0335	7.73723	8.30977	8.36156	8.16677	6.88685	6.51709	5.80712
ENSG00000046647	GEMIN8	gem (nuclear organelle) associated protein 8 [Source:HGNC Symbol;Acc:26044]	X	protein_coding	3.25143	3.67907	3.87626	3.45737	2.98655	3.8027	3.48561	3.14333	3.28494	3.92502	3.27783	3.02301	3.87136	4.06513	4.03123	3.77344	3.79545	3.50718	3.50951	4.02624	3.56757	4.95498	4.37215	3.44667	3.56392	5.43177	3.07884	3.56621	2.82891	4.6244	2.83138	3.18543	3.28443	4.26868	4.01067	2.77495	3.42085	3.65242	3.80588	2.48648
ENSG00000046651	OFD1	oral-facial-digital syndrome 1 [Source:HGNC Symbol;Acc:2567]	X	protein_coding	5.45766	5.98417	5.19105	4.86084	4.84586	4.6578	4.97746	5.38935	5.32772	5.36896	5.40797	5.27234	4.57718	5.81248	6.18503	5.89299	5.92543	5.9453	5.80351	6.11688	4.45025	5.82989	5.87809	5.46739	4.82104	6.88303	4.62022	6.18306	4.72656	5.9453	4.39222	5.876	6.29144	6.42167	5.28925	5.65394	5.20091	5.65509	5.66096	5.44334
ENSG00000046653	GPM6B	glycoprotein M6B [Source:HGNC Symbol;Acc:4461]	X	protein_coding	3.91879	8.21655	5.14796	6.51155	1.98601	2.79057	1.83899	4.6591	3.9651	3.68279	1.90031	3.74596	3.84503	5.1816	4.63377	6.12488	6.26545	4.03881	4.6215	5.47006	3.49781	3.95738	4.29011	3.75884	3.39687	1.91869	2.67834	3.06136	3.43703	2.93396	2.11458	5.98381	3.71111	2.14549	3.22077	2.94097	3.52855	3.50667	4.01255	3.28351
ENSG00000046889	PREX2	phosphatidylinositol-3,4,5-trisphosphate-dependent Rac exchange factor 2 [Source:HGNC Symbol;Acc:22950]	8	protein_coding	2.8325	2.86017	3.96074	3.34517	2.65416	3.17828	3.07668	4.62022	2.89848	2.859	3.88027	3.84693	6.63124	4.85961	4.99176	5.16109	4.5558	5.91722	5.42252	5.7802	4.17765	2.69353	2.38798	4.9377	3.46537	3.11732	3.49062	4.66422	3.45599	4.63315	2.41337	3.58239	4.94601	5.01722	2.73439	3.65242	3.04435	3.95363	3.69029	2.62213
ENSG00000047056	WDR37	WD repeat domain 37 [Source:HGNC Symbol;Acc:31406]	10	protein_coding	4.09852	3.91387	4.15706	3.44667	4.23862	4.85547	4.36952	4.50257	4.3305	3.52944	4.59953	4.2157	4.15455	4.39652	4.09052	4.20795	4.42373	4.33416	4.34567	4.31957	4.94473	4.81665	4.53509	4.59507	3.95055	3.84041	4.57991	4.4057	4.20275	4.5262	3.80548	4.02963	4.47079	4.43443	3.67685	4.33347	4.19786	5.3228	4.49604	4.95832
ENSG00000047188	YTHDC2	YTH domain containing 2 [Source:HGNC Symbol;Acc:24721]	5	protein_coding	4.96623	5.14509	5.11513	5.69443	5.18453	5.73622	5.2756	5.22349	4.71969	5.18878	5.40929	5.51595	5.47782	5.61661	5.90663	5.75992	5.7465	5.8785	5.73455	6.01036	5.9146	5.74106	5.03783	5.49966	4.70712	4.98078	5.13411	5.42494	5.41417	5.06629	5.1074	6.03589	6.03628	5.48377	4.83546	5.86366	5.27955	5.86519	5.59977	4.80136
ENSG00000047230	CTPS2	CTP synthase 2 [Source:HGNC Symbol;Acc:2520]	X	protein_coding	4.56779	4.49051	4.75942	4.12478	4.54791	3.96546	4.27128	3.87626	4.08768	4.35667	4.85169	4.11458	3.69591	4.63917	3.96112	4.05883	4.7311	4.00575	3.74635	4.00652	4.50877	5.69807	5.02424	3.98308	4.75023	3.67352	4.56588	4.26469	4.32282	5.4388	4.06693	5.56809	4.26399	5.27891	5.44771	5.59871	4.73804	4.15138	3.96816	4.14677
ENSG00000047249	ATP6V1H	ATPase, H+ transporting, lysosomal 50/57kDa, V1 subunit H [Source:HGNC Symbol;Acc:18303]	8	protein_coding	5.15543	5.22701	5.52708	4.21645	4.93244	6.76441	5.19535	3.87827	4.97559	5.10486	5.49182	5.4658	4.69658	5.17734	4.487	4.74924	5.00781	4.8593	4.79979	4.5111	5.15025	4.85577	3.9769	4.56199	4.35136	4.39619	4.95683	4.47657	4.16108	5.147	4.92104	5.27747	4.75698	4.18576	5.40896	4.22904	4.65747	4.97913	5.13999	5.02219
ENSG00000047315	POLR2B	polymerase (RNA) II (DNA directed) polypeptide B, 140kDa [Source:HGNC Symbol;Acc:9188]	4	protein_coding	6.77829	6.98449	6.56818	7.28958	6.6328	7.4064	6.88622	7.29844	7.19933	6.77578	7.28568	6.67216	6.50108	6.50726	6.66881	6.6328	6.81567	6.72733	6.60895	6.52042	6.84953	6.90152	7.85505	7.12256	7.3733	6.80525	6.48426	6.86209	7.12614	6.2714	7.354	7.18458	7.4373	6.93727	6.82477	7.35803	6.63226	6.75421	6.78241	6.94369
ENSG00000047346	FAM214A	family with sequence similarity 214, member A [Source:HGNC Symbol;Acc:25609]	15	protein_coding	4.6244	3.96001	4.62959	4.26131	4.40341	5.06722	6.42892	4.81349	5.12518	5.69026	5.09828	4.75664	6.43947	5.47178	5.32898	5.61488	7.30842	5.53011	5.54055	5.84774	3.80467	4.58119	4.92893	6.13229	4.41182	5.02887	3.84264	5.77285	4.01862	6.81026	3.66878	4.54987	5.22442	5.85358	4.41348	4.07155	5.81497	4.32551	6.20823	4.24829
ENSG00000047365	ARAP2	ArfGAP with RhoGAP domain, ankyrin repeat and PH domain 2 [Source:HGNC Symbol;Acc:16924]	4	protein_coding	5.95849	6.20604	5.20122	4.80042	5.3923	7.04325	5.54055	5.7445	6.30312	6.05491	6.43711	5.49111	4.12441	4.51667	5.41576	5.11018	4.75279	5.99456	5.35047	5.05082	4.12076	5.26325	4.46283	5.45552	5.62708	5.11181	4.91693	5.87667	5.71821	5.53689	5.3528	4.93912	6.49113	5.42687	4.00031	4.90229	4.26231	4.37372	6.75717	4.19753
ENSG00000047410	TPR	translocated promoter region, nuclear basket protein [Source:HGNC Symbol;Acc:12017]	1	protein_coding	7.22996	8.20187	8.72347	7.94524	8.42439	8.05889	7.79687	8.03559	8.82314	8.01484	8.24489	8.28862	7.54442	8.16914	8.03769	7.84453	7.78367	7.91491	7.62265	7.56691	8.84724	8.99265	8.356	8.23985	7.76258	7.90561	9.07174	8.35047	9.39622	8.47218	8.68345	8.54419	8.50611	7.96466	8.00258	9.3015	8.01073	9.04799	8.07398	7.7171
ENSG00000047457	CP	ceruloplasmin (ferroxidase) [Source:HGNC Symbol;Acc:2295]	3	protein_coding	3.27018	1.99706	8.69064	1.09491	3.14231	4.88702	5.39611	6.82602	7.31347	4.59987	4.70815	10.2276	4.96922	7.72017	7.20186	3.66266	6.07258	5.27747	4.84233	5.73721	4.72786	8.37838	5.49799	8.22238	4.90901	9.17641	2.83648	5.92891	3.72218	8.52818	1.79165	5.89055	5.38031	7.46624	0.307836	6.62606	5.90626	7.03587	5.16855	6.84319
ENSG00000047578	KIAA0556	KIAA0556 [Source:HGNC Symbol;Acc:29068]	16	protein_coding	5.39099	4.57307	5.24944	4.90131	5.07572	5.37611	5.37772	5.02357	4.86664	5.33464	4.66934	4.3073	4.447	5.31803	5.13774	5.04525	5.56673	4.89975	5.05721	5.12	5.1577	5.33774	5.21798	5.17571	4.8951	5.88251	5.07732	4.88385	5.96044	5.41261	4.42239	5.48307	4.8951	5.26114	4.95355	6.03861	5.20029	4.9111	4.687	4.42207
ENSG00000047579	DTNBP1	dystrobrevin binding protein 1 [Source:HGNC Symbol;Acc:17328]	6	protein_coding	3.82849	2.9826	3.63874	3.40874	3.23643	4.05244	3.84387	2.65057	3.83271	3.07561	3.59523	4.16393	3.6104	3.47601	3.07614	2.66569	2.83648	2.91196	2.88371	3.01201	3.43387	3.93767	4.36079	3.19307	3.67782	2.69659	3.57721	3.41748	4.06728	3.63921	4.33176	4.27887	3.28045	3.04385	3.75923	3.07044	2.93178	4.27821	3.77467	3.91046
ENSG00000047597	XK	X-linked Kx blood group (McLeod syndrome) [Source:HGNC Symbol;Acc:12811]	X	protein_coding	4.00432	3.82302	0.562343	0.900509	2.88435	-0.0990215	1.39652	1.39426	1.96334	-0.408006	1.77465	3.39546	-0.707412	-0.17392	1.84804	0.431727	-0.841594	0.577706	1.25598	1.47229	2.08581	2.28434	1.96172	-1.90926	0.0808162	0.675564	1.33829	-1.33999	1.67173	-1.66391	3.01862	-1.04096	1.37313	-1.83147	3.62823	3.23807	3.47515	0.898949	1.67173	1.04339
ENSG00000047617	ANO2	anoctamin 2 [Source:HGNC Symbol;Acc:1183]	12	protein_coding	1.4192	0.9526	-0.190424	0.9526	0.786868	0.18012	0.371032	0.14175	0.930954	1.05744	-0.228283	0.955636	4.73712	1.46646	2.28008	2.28294	1.83181	2.53055	2.31415	2.74763	-0.877	1.37203	3.13969	1.97811	0.468305	0.552957	0.187052	0.844362	2.67896	2.19937	2.83943	0.153273	2.13401	1.87629	2.26702	1.07476	-0.461371	1.5265	0.773176	1.15131
ENSG00000047621	C12orf4	chromosome 12 open reading frame 4 [Source:HGNC Symbol;Acc:1184]	12	protein_coding	3.62142	4.85042	4.86866	3.68366	5.13705	4.65812	4.14368	4.85866	4.20001	4.46852	4.41865	3.84348	3.82437	4.14919	3.6811	3.66832	3.85065	4.001	3.82807	3.45238	4.59181	5.46139	4.73898	4.46919	4.10645	4.14116	3.90659	4.04212	6.21582	4.21038	4.56199	4.59021	4.16142	3.90775	5.05179	4.10794	3.61674	4.04743	4.59987	4.20829
ENSG00000047634	SCML1	sex comb on midleg-like 1 (Drosophila) [Source:HGNC Symbol;Acc:10580]	X	protein_coding	1.632	0.994893	2.90268	3.05575	2.12928	3.47692	2.15091	2.99905	2.8015	2.28294	2.77254	2.44722	4.43547	3.60281	3.99962	3.48561	3.61863	3.92354	3.88068	4.52942	3.49874	2.60668	3.94071	3.30426	1.11289	2.95925	3.07503	3.02043	2.2025	3.46624	2.58785	3.33947	3.22429	4.53237	4.72856	4.06135	1.26004	3.89811	2.93124	3.43656
ENSG00000047644	WWC3	WWC family member 3 [Source:HGNC Symbol;Acc:29237]	X	protein_coding	6.10237	5.61488	5.83394	5.77359	6.03702	6.61101	6.95848	5.90872	6.07018	6.56264	6.06264	5.76908	5.96403	6.23963	5.83604	6.10013	6.40245	5.71236	6.09624	6.0131	5.74106	6.14522	6.53163	6.251	5.26712	6.58831	6.81087	5.81463	5.04456	6.84953	5.80037	4.59442	5.84104	6.84895	6.59974	6.07912	6.58677	5.65881	6.21951	5.75783
ENSG00000047648	ARHGAP6	Rho GTPase activating protein 6 [Source:HGNC Symbol;Acc:676]	X	protein_coding	1.96253	2.13087	2.1093	2.44788	2.3576	1.77652	2.55773	3.0449	1.96754	2.38798	2.87715	2.33324	4.74507	3.79417	3.44667	4.03	3.42223	4.20862	4.16641	4.20761	2.47241	1.45519	1.7357	3.51927	2.36228	2.17245	2.4759	2.50731	1.91608	2.4978	1.94717	2.3659	2.53184	4.50712	0.0193518	1.19791	3.18594	3.23438	2.91686	2.57954
ENSG00000047662	FAM184B	family with sequence similarity 184, member B [Source:HGNC Symbol;Acc:29235]	4	protein_coding	-0.565554	-1.78368	-0.813885	5.89511	-2.28439	3.92316	-1.66391	-0.977943	-2.50281	1.40824	-0.414041	-0.464726	-1.25583	1.67362	1.87541	1.18161	0.450123	-2.23391	-0.468076	-1.54036	0.721708	0.0268566	-1.34513	-2.30649	-1.54675	0.0561943	-3.18784	-1.97756	-1.3686	-0.849566	2.85844	-0.837762	-0.941601	-2.43451	-0.308454	-1.19026	-4.49641	0.189468	-1.99535	-0.37739
ENSG00000047849	MAP4	microtubule-associated protein 4 [Source:HGNC Symbol;Acc:6862]	3	protein_coding	7.06382	8.59834	8.68345	8.01896	8.35878	8.22486	8.10257	7.99247	7.88544	8.11152	8.46308	8.4661	8.62732	8.24995	7.7674	7.78695	7.97056	7.97253	8.00055	8.05036	8.356	8.63767	8.29915	8.37275	8.0335	8.30977	8.52818	8.43913	8.38404	7.99247	9.16094	8.65158	8.1527	8.51868	7.31775	8.6035	7.82554	8.32049	8.62389	8.23734
ENSG00000047932	GOPC	golgi-associated PDZ and coiled-coil motif containing [Source:HGNC Symbol;Acc:17643]	6	protein_coding	5.10837	5.97689	5.49041	5.26211	6.69851	5.62575	5.88791	6.19583	5.69125	5.7802	5.9816	4.75312	4.96623	5.3774	5.14477	5.40024	5.34635	5.39415	5.20673	5.24325	6.06036	5.37907	5.59619	5.15831	5.14093	5.67243	6.10126	5.13967	5.65288	5.28277	5.55443	5.93855	5.47646	5.52671	5.89619	5.62575	5.45035	5.82819	5.55474	5.67342
ENSG00000047936	ROS1	c-ros oncogene 1 , receptor tyrosine kinase [Source:HGNC Symbol;Acc:10261]	6	protein_coding	-3.45671	-4.1946	-2.28439	-0.683566	2.62476	0.240459	-0.753411	0.203239	0.388499	2.08982	-2.06031	1.55332	-2.51426	-2.91602	-3.1487	-5.45477	-2.85359	-5.11295	-3.45671	-5.69213	1.45624	-1.20583	0.579514	0.739498	0.957106	1.76895	4.21188	-3.37633	1.45519	0.413516	-3.51182	-0.784593	-2.62393	-3.53812	-4.1946	0.922559	-1.0693	1.02741	-2.32724	1.86611
ENSG00000048028	USP28	ubiquitin specific peptidase 28 [Source:HGNC Symbol;Acc:12625]	11	protein_coding	4.56906	4.24793	5.0878	3.79876	3.99703	4.54218	4.62927	4.61087	5.33668	4.61601	4.20341	5.02357	3.52059	4.79505	4.41511	4.37081	4.55098	4.60277	4.26094	4.02357	4.25619	4.68125	4.54565	4.68093	4.72197	3.72986	3.91121	4.4938	5.36438	5.09763	4.28779	5.20061	4.47934	4.18368	5.34336	5.6571	4.11607	4.73016	4.53071	4.93184
ENSG00000048052	HDAC9	histone deacetylase 9 [Source:HGNC Symbol;Acc:14065]	7	protein_coding	5.77448	5.43771	4.71905	6.4714	6.28456	6.80404	4.50422	5.49589	7.58496	5.89806	5.51292	7.20016	4.2147	4.63593	5.31548	4.54308	2.92583	5.56083	4.32181	4.02321	4.2147	7.01521	4.33245	4.18127	6.27522	5.7257	6.74825	5.31548	5.75924	5.17404	6.99787	3.45826	6.30822	4.68093	5.44272	5.40733	4.65233	4.78698	5.85504	5.90983
ENSG00000048140	TSPAN17	tetraspanin 17 [Source:HGNC Symbol;Acc:13594]	5	protein_coding	4.59085	5.73856	5.16917	4.56296	5.20641	5.39196	5.78778	4.95528	5.09292	5.92373	4.94788	5.85142	5.24774	4.82265	4.78634	4.77425	5.44832	4.80907	4.77077	4.8157	5.15986	5.16728	2.61629	4.87634	4.98048	6.45801	4.91481	4.98294	5.04557	4.80745	4.96623	5.48909	5.28771	4.9997	5.62026	5.64988	4.89319	5.41892	5.16109	5.93137
ENSG00000048162	NOP16	NOP16 nucleolar protein [Source:HGNC Symbol;Acc:26934]	5	protein_coding	3.49196	5.0162	4.07582	3.97615	3.77217	3.97927	4.18969	3.65113	3.78086	4.29724	3.3846	4.45801	3.8012	3.32021	3.52944	3.13914	3.38973	2.08581	3.0984	4.15853	5.58311	4.92736	3.74876	4.17247	3.62569	4.13229	4.38386	3.2463	4.42173	3.76736	5.18646	4.19001	3.47789	3.80231	4.4679	4.05428	4.01483	4.62698	3.96854	4.4762
ENSG00000048342	CC2D2A	coiled-coil and C2 domain containing 2A [Source:HGNC Symbol;Acc:29253]	4	protein_coding	2.17646	2.81762	3.55311	3.92049	4.08561	2.14785	2.4759	3.67001	3.14027	2.32533	3.65456	1.51591	4.21719	3.67127	4.13123	3.91577	3.52855	4.13193	3.83158	4.1556	4.84982	2.13401	3.37901	3.57767	2.72638	2.24574	3.54268	3.93681	3.71417	1.89691	4.37402	1.87928	3.33554	3.16116	4.08733	2.94653	2.37648	3.96663	1.45047	2.95656
ENSG00000048392	RRM2B	ribonucleotide reductase M2 B (TP53 inducible) [Source:HGNC Symbol;Acc:17296]	8	protein_coding	5.9548	5.05179	4.97716	4.96593	5.77558	6.29574	5.58439	5.57907	4.81349	5.33774	5.03215	6.32643	5.23975	5.07414	5.16952	4.8385	5.14128	5.0569	5.13935	4.99608	4.53602	3.6945	3.81134	5.03684	5.26644	6.87373	4.87097	4.98359	4.23695	4.59569	4.38619	5.54636	5.51099	5.29502	4.91756	5.85972	5.07836	4.0535	5.26246	5.19466
ENSG00000048405	ZNF800	zinc finger protein 800 [Source:HGNC Symbol;Acc:27267]	7	protein_coding	4.54864	5.13609	5.57635	5.624	4.86317	5.15451	5.35964	5.14258	5.47144	5.65185	5.38396	5.6844	5.41384	5.67243	5.33265	5.14574	5.20872	5.4841	5.45107	5.5163	5.36795	5.58439	5.26516	5.05011	4.90289	4.17143	5.00883	5.30294	5.05277	5.81423	5.3125	5.13967	5.41447	5.36993	4.99643	5.0162	4.86764	5.17212	5.30294	5.05563
ENSG00000048462	TNFRSF17	tumor necrosis factor receptor superfamily, member 17 [Source:HGNC Symbol;Acc:11913]	16	protein_coding	1.76332	1.45273	-0.119316	-0.703244	-0.0528097	4.32478	2.39018	2.02189	5.04626	-0.355571	3.56442	3.08306	1.26004	1.31789	1.28551	0.972335	1.06324	2.7483	3.23594	3.29187	-0.795845	2.75203	0.742807	-1.14884	2.37284	-1.56633	1.22988	3.31684	-2.79053	3.32862	2.19559	-2.07924	2.15321	0.333911	-2.10589	-1.91771	1.75489	-1.87909	5.96562	-1.61912
ENSG00000048471	SNX29	sorting nexin 29 [Source:HGNC Symbol;Acc:30542]	16	protein_coding	6.06309	6.10704	6.4815	5.64638	6.63176	7.03802	6.33215	6.40873	6.36287	5.84496	6.77829	6.00688	6.1376	6.16166	5.94605	6.13001	5.63233	6.5306	6.06751	5.93855	5.77014	5.509	5.96403	6.21821	5.74273	6.08337	5.93742	7.08716	5.86519	6.36415	5.76028	6.11536	6.9148	6.15083	6.29887	5.31773	5.96441	5.49799	6.79535	6.03628
ENSG00000048540	LMO3	LIM domain only 3 (rhombotin-like 2) [Source:HGNC Symbol;Acc:6643]	12	protein_coding	2.68234	1.65081	1.04611	1.19522	0.991881	-0.829881	2.3821	-0.336624	0.842875	1.67362	-0.829881	2.519	3.88448	1.47575	-0.537915	-0.119316	-0.17392	1.46164	1.61123	-0.565554	-1.28235	0.0561943	0.596903	2.54046	0.472405	-1.50206	-2.26396	-0.72573	4.04097	2.61629	1.32141	3.86816	-1.20583	-3.31107	1.11421	-0.880802	0.493843	-0.308454	-0.441684	-0.187717
ENSG00000048544	MRPS10	mitochondrial ribosomal protein S10 [Source:HGNC Symbol;Acc:14502]	6	protein_coding	6.3074	5.62467	5.0987	5.51227	4.86603	5.61055	5.69411	4.96494	6.22498	5.03043	4.66422	6.04725	5.49589	5.01371	5.21126	4.81852	5.51737	4.94754	5.05049	5.01172	5.29967	5.29116	5.32639	4.80486	4.652	5.60432	5.23308	5.13509	6.18581	5.21476	5.52844	5.17668	5.43177	5.03011	5.2739	3.92127	4.70975	5.40631	4.80621	5.55076
ENSG00000048649	RSF1	remodeling and spacing factor 1 [Source:HGNC Symbol;Acc:18118]	11	protein_coding	6.34957	5.81531	6.11729	6.43074	5.69298	5.80712	6.13154	6.13471	5.98612	5.92009	6.08982	6.36287	5.76321	6.40508	6.16411	6.2627	6.23159	6.27782	6.08108	5.98612	5.86115	6.19541	6.6411	6.32473	6.87638	5.89336	6.56924	6.30064	6.45429	6.13428	6.04089	6.50726	6.28713	8.01689	5.85358	6.38671	5.8446	6.24547	6.12764	6.09892
ENSG00000048707	VPS13D	vacuolar protein sorting 13 homolog D (S. cerevisiae) [Source:HGNC Symbol;Acc:23595]	1	protein_coding	8.81126	7.31443	7.46624	7.31041	6.81681	7.79854	8.41855	7.4018	8.22983	7.84628	8.03769	8.79557	7.53562	7.83413	8.13881	8.00869	7.86034	8.17625	7.92429	7.9965	7.55279	6.85077	7.29159	8.0937	6.8174	7.94717	6.69021	7.7341	6.98048	7.72479	7.92053	7.96859	8.29125	8.51552	6.6704	7.34559	7.30156	8.04824	7.40532	7.36419
ENSG00000048740	CELF2	CUGBP, Elav-like family member 2 [Source:HGNC Symbol;Acc:2550]	10	protein_coding	4.37179	5.43943	4.68891	6.32687	5.35249	6.06906	6.31007	5.82785	6.47778	4.76531	7.17246	5.51465	6.97495	4.44335	5.70064	5.91572	5.46705	6.28153	6.54155	6.48848	7.88363	6.14678	3.3149	5.77014	4.48301	4.90569	6.12568	6.29931	6.88107	5.14258	4.62408	4.81976	6.43026	5.0459	5.16308	3.98347	4.08009	4.42207	7.02978	4.3176
ENSG00000048828	FAM120A	family with sequence similarity 120A [Source:HGNC Symbol;Acc:13247]	9	protein_coding	7.20282	8.05405	7.50868	7.23192	7.44284	8.7346	7.66986	7.16323	7.50288	7.67748	7.73254	7.55036	6.90217	7.31775	7.20724	7.41701	7.7004	7.31238	7.15286	7.09046	8.03979	7.14094	7.04031	7.64666	7.45935	7.24745	7.71099	7.39369	7.00442	7.57467	7.76579	7.31443	7.27428	7.63588	7.3479	7.32863	7.30936	7.44057	7.32067	7.72171
ENSG00000048991	R3HDM1	R3H domain containing 1 [Source:HGNC Symbol;Acc:9757]	2	protein_coding	5.0054	5.81566	4.38175	4.68669	5.02114	4.88895	4.78954	4.60247	4.98482	4.36845	5.38192	5.18129	3.94883	3.73788	3.71537	3.59266	3.73239	3.83713	3.63076	3.5872	6.21239	5.47144	5.25207	4.59116	5.63437	4.69986	6.13229	4.51667	5.70303	4.75728	6.22235	5.5474	4.90259	5.40278	6.25011	5.83067	5.82989	4.75146	5.4186	5.69227
ENSG00000049089	COL9A2	collagen, type IX, alpha 2 [Source:HGNC Symbol;Acc:2218]	1	protein_coding	4.81349	5.39611	3.88068	8.80732	3.82889	1.67961	4.15924	3.504	3.93567	0.730295	3.70209	2.49367	1.9816	5.41637	5.70951	4.57307	4.70332	4.2727	4.18862	3.9551	3.58459	5.45766	5.16109	2.843	9.2958	3.34358	4.72002	3.57049	4.36984	4.41447	2.1972	7.12256	4.30001	3.01925	4.97589	3.88489	2.18306	7.00878	4.51467	6.08675
ENSG00000049130	KITLG	KIT ligand [Source:HGNC Symbol;Acc:6343]	12	protein_coding	5.96367	5.86659	4.16829	3.49107	3.94646	6.74881	4.60503	4.29691	3.75754	5.15634	3.5109	4.65072	4.81634	5.30294	4.81883	5.00883	5.24325	5.3144	5.3975	4.60116	3.51361	5.26357	2.80207	6.13471	3.0678	5.09485	3.48662	4.69025	6.84128	4.24031	2.93284	3.24324	4.5357	4.73267	4.88669	2.9058	5.37516	3.19307	4.15287	5.45233
ENSG00000049167	ERCC8	excision repair cross-complementing rodent repair deficiency, complementation group 8 [Source:HGNC Symbol;Acc:3439]	5	protein_coding	1.88533	2.09942	1.82017	3.22682	1.89865	2.76747	1.42494	1.74913	1.67362	2.19937	2.47177	2.3821	2.42851	1.50669	1.60677	1.78408	1.92893	0.809683	1.8533	1.51476	2.90802	2.75506	2.41907	2.1972	2.92139	1.51591	2.49932	1.47229	2.84882	1.57656	2.65057	3.13914	1.91608	1.51794	2.96223	3.055	2.30054	2.29889	2.2443	2.43848
ENSG00000049192	ADAMTS6	ADAM metallopeptidase with thrombospondin type 1 motif, 6 [Source:HGNC Symbol;Acc:222]	5	protein_coding	1.75489	1.96172	2.28591	3.70578	4.02515	2.88834	2.91793	3.64943	2.13785	4.04997	2.93756	2.5177	2.27085	-0.0908834	-0.38477	0.519355	0.766459	1.95492	0.937452	1.4641	2.50384	1.75489	2.12309	3.39018	2.73183	3.94298	2.12928	2.15163	1.57426	2.14098	2.41127	3.45693	2.88186	3.65286	2.00807	2.47865	2.68935	2.57486	2.87533	2.19559
ENSG00000049239	H6PD	hexose-6-phosphate dehydrogenase (glucose 1-dehydrogenase) [Source:HGNC Symbol;Acc:4795]	1	protein_coding	8.03979	7.42712	7.16992	7.01308	6.73386	6.70926	7.56043	7.70795	6.97915	6.80774	7.21361	7.21528	8.11602	7.67269	8.044	7.85153	7.73723	8.01689	8.15972	7.86924	6.42259	6.07335	5.81353	7.60878	6.19174	7.11711	6.88169	7.75937	7.26671	7.30649	6.51754	7.00965	7.80858	7.26075	6.16667	6.47426	7.04919	7.41806	6.85404	7.99852
ENSG00000049245	VAMP3	vesicle-associated membrane protein 3 [Source:HGNC Symbol;Acc:12644]	1	protein_coding	5.86822	6.91951	6.11338	6.68487	6.57553	6.60946	6.7098	6.17906	6.17529	6.82666	6.38115	6.64939	7.70644	6.57088	7.03126	6.75717	6.73549	6.84253	7.16829	7.14298	6.37225	5.66055	5.43848	7.06639	5.79673	6.7859	5.92299	6.43486	5.58439	5.87965	6.30231	5.92442	6.27437	6.41008	5.6974	6.35165	6.62707	6.07754	6.2607	6.65871
ENSG00000049246	PER3	period circadian clock 3 [Source:HGNC Symbol;Acc:8847]	1	protein_coding	6.75656	4.70111	5.35605	6.15441	5.02947	3.91007	3.85931	5.69264	4.99543	5.10677	3.56621	4.97619	6.05608	6.661	6.39927	4.49861	4.23278	6.23002	6.32176	5.19075	5.07866	2.46244	4.33548	4.43347	4.55964	6.03589	4.35667	4.11814	4.72358	4.21677	5.96329	3.85288	3.19698	4.852	4.45464	4.67995	4.61442	5.05345	3.78047	4.78061
ENSG00000049249	TNFRSF9	tumor necrosis factor receptor superfamily, member 9 [Source:HGNC Symbol;Acc:11924]	1	protein_coding	1.61661	1.72243	-0.791875	1.18161	2.04684	2.91904	1.29336	0.281339	2.63645	2.45843	2.34744	1.97976	-0.703244	-2.46752	-2.03275	-0.199483	-2.67739	1.49251	-1.00981	-2.2428	0.263834	2.28669	-0.829881	1.38716	1.92477	0.605695	2.10772	2.28745	3.12745	-1.19502	1.98683	1.35045	1.33358	1.64696	-0.21421	-0.240619	0.490168	0.973796	4.06513	3.89653
ENSG00000049283	EPN3	epsin 3 [Source:HGNC Symbol;Acc:18235]	17	protein_coding	4.66934	4.37434	4.04388	-1.87909	1.84069	5.34398	4.92799	2.37215	1.93591	3.80427	3.79187	4.45906	1.60913	4.06615	3.04119	3.15554	3.36771	2.31117	2.82175	1.94187	4.83576	3.21668	4.95623	3.86249	2.39619	5.17433	3.10528	2.84577	2.94893	4.00846	5.11218	4.35335	2.9438	2.58014	2.42981	4.76622	4.5357	2.65299	2.87354	0.872482
ENSG00000049323	LTBP1	latent transforming growth factor beta binding protein 1 [Source:HGNC Symbol;Acc:6714]	2	protein_coding	9.12055	7.13519	7.85857	6.63025	8.49057	7.55677	7.60165	7.22996	7.77063	7.71557	7.70341	8.9526	6.01724	6.54616	6.19941	6.15763	6.07174	6.33173	6.92376	6.07411	6.22235	9.1406	7.449	6.42212	8.93951	8.70513	7.89273	7.08816	6.99179	6.63333	8.45105	8.02516	6.98518	7.50868	7.01669	7.39978	8.13881	7.04325	8.12281	8.13651
ENSG00000049449	RCN1	reticulocalbin 1, EF-hand calcium binding domain [Source:HGNC Symbol;Acc:9934]	11	protein_coding	5.81757	7.74816	7.52947	7.30749	6.67095	6.48959	5.62163	6.75543	6.95165	6.21821	5.92407	6.42492	6.39364	6.56264	5.98531	6.5087	6.16531	6.06452	6.12956	6.26017	7.51778	7.94332	7.57981	6.57656	7.46284	6.92171	7.54051	6.43026	7.77063	5.54708	7.22709	7.78695	6.61101	5.50425	9.00171	7.43286	5.14289	6.70015	7.27242	8.36714
ENSG00000049540	ELN	elastin [Source:HGNC Symbol;Acc:3327]	7	protein_coding	1.93059	2.93065	6.14832	5.69059	10.1789	3.28802	4.58667	9.65448	4.96084	5.17465	5.06201	6.49011	6.59766	4.75055	4.4526	5.73897	4.69658	5.708	6.92695	6.9148	5.74073	6.15516	2.46704	5.70837	8.16442	3.94071	3.57459	6.28543	4.70394	6.24921	1.31315	8.87178	5.67143	7.4018	1.69231	9.88728	5.68405	5.31548	4.84651	6.8824
ENSG00000049541	RFC2	replication factor C (activator 1) 2, 40kDa [Source:HGNC Symbol;Acc:9970]	7	protein_coding	5.03581	5.03246	5.16597	4.27084	5.0987	4.81538	5.09485	4.73079	5.16825	5.38001	3.96701	5.55011	4.20726	4.33313	3.92648	3.38089	3.97349	3.6819	3.85726	3.57273	5.35537	5.34336	5.23776	4.36378	5.35249	5.96044	5.07243	3.47979	6.21323	4.8713	5.20474	5.45998	4.35667	4.3872	5.88555	4.54187	4.94754	4.44208	3.93138	4.57991
ENSG00000049618	ARID1B	AT rich interactive domain 1B (SWI1-like) [Source:HGNC Symbol;Acc:18040]	6	protein_coding	7.444	7.12614	8.02724	6.96202	7.69066	7.99247	7.41191	7.78531	8.044	7.29159	7.49787	7.44794	7.12614	8.04612	7.63736	7.7919	7.59611	7.6141	7.53309	7.46046	7.92429	7.3839	7.76579	7.53813	6.62864	7.3829	8.10928	7.88182	7.54558	7.90007	8.43913	8.74582	8.08051	8.28862	7.35304	7.89456	7.23965	8.54419	7.69589	7.44057
ENSG00000049656	CLPTM1L	CLPTM1-like [Source:HGNC Symbol;Acc:24308]	5	protein_coding	6.71191	7.3245	7.05317	5.68136	5.96441	6.31793	6.47187	6.32432	6.67749	6.20018	6.1818	6.67269	6.17862	6.4738	5.62575	5.71955	6.23683	5.6536	5.90226	5.96562	6.35124	7.01035	6.61883	6.43896	6.95577	7.03802	6.91552	6.07528	6.25261	6.45383	6.3118	6.03125	6.21406	6.89358	7.62929	6.31493	6.48243	6.34789	7.49058	6.30868
ENSG00000049759	NEDD4L	neural precursor cell expressed, developmentally down-regulated 4-like, E3 ubiquitin protein ligase [Source:HGNC Symbol;Acc:7728]	18	protein_coding	6.8204	4.85991	5.74858	6.08457	2.75145	3.58766	5.19428	6.01503	4.93015	5.75639	5.79932	4.95175	5.71724	7.67902	7.05	6.85211	6.70811	5.81005	6.5579	6.1284	5.32472	5.96189	5.65022	6.69411	5.29599	5.65185	2.81701	5.48744	6.07793	5.7802	6.95508	5.70064	5.32248	8.01278	6.93031	5.58083	6.15961	4.6931	4.80806	5.81463
ENSG00000049768	FOXP3	forkhead box P3 [Source:HGNC Symbol;Acc:6106]	X	protein_coding	1.52004	1.72989	2.31185	1.49363	1.9995	3.47232	2.41479	2.34231	2.83713	1.76236	3.22077	2.31117	-0.352689	-0.312066	-0.880802	0.102003	-0.268916	1.587	-0.635401	-0.455057	1.38159	2.58257	1.61758	1.93506	2.25147	1.95751	2.23994	3.41519	3.37295	0.903997	2.62924	1.88984	3.39453	3.31582	1.58075	1.81841	2.18458	1.36962	3.76736	2.00807
ENSG00000049769	PPP1R3F	protein phosphatase 1, regulatory subunit 3F [Source:HGNC Symbol;Acc:14944]	X	protein_coding	2.47046	3.33165	5.29206	3.27116	2.03211	3.62782	2.73362	2.50868	2.48581	3.52586	2.93686	1.90233	2.52663	4.51078	2.68423	2.86424	2.37284	2.65116	3.22923	2.34744	4.32622	4.02515	4.70332	2.24732	0.773176	3.04887	3.20477	2.53315	2.66256	3.14816	2.33455	0.879112	2.62476	3.20425	2.97011	4.37575	3.78007	3.73282	2.67276	3.01749
ENSG00000049860	HEXB	hexosaminidase B (beta polypeptide) [Source:HGNC Symbol;Acc:4879]	5	protein_coding	5.81106	5.80211	5.93352	4.869	6.16798	6.0799	5.9432	5.6547	5.91937	6.11688	6.01113	6.15395	5.67407	5.6547	5.37516	5.27263	5.3975	5.56842	5.97376	5.38679	4.56715	6.201	5.36195	5.60294	6.25844	5.44303	5.48273	5.35312	5.47318	5.63808	5.27172	6.32176	5.12615	5.02855	5.86776	6.2425	4.83576	4.66649	6.07258	5.65945
ENSG00000049883	PTCD2	pentatricopeptide repeat domain 2 [Source:HGNC Symbol;Acc:25734]	5	protein_coding	2.58076	2.74643	2.56948	2.1972	2.56301	2.86645	2.78993	2.81042	2.14329	2.87063	2.27152	2.1645	2.86079	2.34507	2.41551	2.82692	2.41479	2.69291	2.78685	1.7482	3.00075	3.22923	2.21861	2.27572	2.24285	1.84624	2.03031	2.36295	3.34896	2.04604	2.81701	2.70105	2.33661	2.37648	2.95272	3.58239	1.98253	2.9404	2.46377	2.43413
ENSG00000050030	KIAA2022	KIAA2022 [Source:HGNC Symbol;Acc:29433]	X	protein_coding	5.40309	4.35598	2.69601	1.22441	0.680617	0.292306	4.9747	0.857245	2.17245	4.12512	0.208555	4.76815	2.08336	1.77075	1.81927	1.7308	2.09057	0.951098	2.69054	2.34507	3.78957	3.90575	0.839588	1.15649	1.33001	3.12583	2.46573	-0.302019	1.02328	2.46446	3.41748	-0.0441819	1.49251	2.68365	4.12179	3.22478	3.21023	3.22077	2.92887	4.54531
ENSG00000050130	JKAMP	JNK1/MAPK8-associated membrane protein [Source:HGNC Symbol;Acc:20184]	14	protein_coding	4.8823	4.60116	3.96185	4.40405	4.23963	4.71618	4.42499	3.99591	3.87052	4.93502	4.14991	4.40095	4.5262	4.23556	4.32798	4.36745	4.82606	4.2979	4.45195	4.01067	3.89736	4.22014	3.6819	4.29451	4.91034	5.07243	3.76208	4.30283	4.29011	4.11529	4.82928	4.60602	4.24202	4.57851	4.41311	3.56305	4.63884	3.5299	4.5792	4.18165
ENSG00000050165	DKK3	dickkopf WNT signaling pathway inhibitor 3 [Source:HGNC Symbol;Acc:2893]	11	protein_coding	4.15219	4.10289	6.17657	6.75543	7.44057	3.26723	6.23645	5.96973	3.94926	5.82566	5.77359	4.07231	5.42758	7.45573	6.56718	6.62257	6.30312	5.89511	7.23878	6.23607	3.34309	3.725	4.55805	5.00097	4.7368	5.67541	5.12328	6.30822	4.35667	4.19616	4.49285	4.24451	5.60195	4.91268	5.77088	4.5078	6.21821	6.89946	3.65711	7.0335
ENSG00000050327	ARHGEF5	Rho guanine nucleotide exchange factor (GEF) 5 [Source:HGNC Symbol;Acc:13209]	7	protein_coding	5.31408	5.95297	6.0553	3.80548	7.03802	6.25547	6.50346	5.57566	6.23484	6.32	5.90262	5.55953	5.34274	6.75117	8.02724	6.76191	7.33488	6.03516	6.95577	6.87434	6.20996	4.90289	5.20189	6.76248	6.36235	5.70064	6.13428	6.4207	5.62197	6.42892	6.8241	5.57317	6.59299	6.23963	6.17143	6.9028	4.38105	4.70913	4.99608	4.90068
ENSG00000050344	NFE2L3	nuclear factor, erythroid 2-like 3 [Source:HGNC Symbol;Acc:7783]	7	protein_coding	6.89358	6.41187	7.06885	5.50157	4.14048	5.53722	4.82039	6.04571	5.76562	5.06814	4.81508	4.35	3.5723	6.46465	4.07619	3.31101	2.4978	4.00846	3.49386	3.02927	5.07901	6.52589	4.55773	3.51688	5.89511	3.57365	4.76305	4.22466	7.78367	5.73062	7.49426	3.74635	4.36984	3.74756	4.80486	3.77549	4.66521	2.22109	6.29406	4.31586
ENSG00000050393	MCUR1	mitochondrial calcium uniporter regulator 1 [Source:HGNC Symbol;Acc:21097]	6	protein_coding	6.18738	5.97157	5.58376	5.80822	5.75281	5.99672	5.77321	5.65847	6.21406	5.74962	4.86448	6.22925	5.4351	5.30902	5.18581	5.33933	5.24292	5.00883	5.0569	5.08186	5.12645	5.41734	6.41008	4.88259	4.87064	5.13475	5.97759	5.14062	6.54918	5.47646	6.37882	5.74617	5.26644	5.45233	5.23975	4.66229	5.46835	5.97008	4.9182	5.77879
ENSG00000050405	LIMA1	LIM domain and actin binding 1 [Source:HGNC Symbol;Acc:24636]	12	protein_coding	6.33981	5.0208	5.60258	6.2166	6.92758	5.84876	6.34242	6.29532	5.14446	6.77886	5.47382	5.3241	7.29844	6.5647	7.40848	6.94077	6.46371	7.25618	6.90341	6.98518	3.76501	4.3292	4.31586	6.77578	5.71479	6.14277	5.88555	7.00229	5.34759	6.29224	4.30041	5.96115	6.69411	7.09764	4.52185	5.3039	5.61626	6.31832	5.82853	7.1344
ENSG00000050426	LETMD1	LETM1 domain containing 1 [Source:HGNC Symbol;Acc:24241]	12	protein_coding	5.27714	4.25515	4.30938	4.72918	5.69092	4.50422	5.09355	4.67097	4.03231	4.99297	4.78826	4.47079	5.78638	5.35737	5.64207	5.7003	5.58376	5.28377	5.51737	5.60744	4.87097	4.74507	4.09852	4.89355	4.08768	4.55484	4.42694	5.28637	4.34599	4.46886	4.72786	5.32248	5.18941	4.99543	4.29519	4.1262	4.49737	4.49538	4.75115	4.14919
ENSG00000050438	SLC4A8	solute carrier family 4, sodium bicarbonate cotransporter, member 8 [Source:HGNC Symbol;Acc:11034]	12	protein_coding	2.66899	3.25353	1.53931	1.42036	0.670445	1.12255	1.8784	0.922559	0.450123	3.98706	1.12255	-0.159419	0.579514	2.54107	3.4649	2.53926	1.68714	1.88632	2.48454	2.0643	1.8034	0.0117867	1.39888	1.71431	2.11614	0.709325	-0.0205419	1.27135	0.672213	1.54698	2.71319	0.887277	3.22779	2.11688	4.86541	0.638746	4.07619	1.74913	1.58905	1.57971
ENSG00000050555	LAMC3	laminin, gamma 3 [Source:HGNC Symbol;Acc:6494]	9	protein_coding	1.15518	2.01595	3.2661	5.1074	2.98031	1.58179	1.588	2.84633	1.64111	3.01034	0.0440331	1.89865	2.71655	2.95435	3.02874	3.86055	3.5872	3.71031	3.65456	4.85417	6.27059	1.87175	1.21359	1.78501	1.55116	0.677243	3.18893	2.97574	0.226506	1.23111	-0.0652988	1.54698	1.8175	-0.268916	1.89781	1.39307	1.73674	4.45227	-1.20058	4.10396
ENSG00000050628	PTGER3	prostaglandin E receptor 3 (subtype EP3) [Source:HGNC Symbol;Acc:9595]	1	protein_coding	5.22477	3.68623	4.24613	1.79886	3.35222	2.6099	4.11205	3.40121	2.94434	3.75477	3.02043	5.54803	7.05767	3.40551	3.73282	4.21225	5.43146	4.37372	4.28744	5.71441	5.21768	0.929471	0.914847	4.51141	3.65754	3.82607	2.93124	4.63825	1.4192	4.75975	2.01231	3.70739	3.63637	2.75982	1.13071	2.96517	1.77752	3.03469	3.50718	0.168485
ENSG00000050730	TNIP3	TNFAIP3 interacting protein 3 [Source:HGNC Symbol;Acc:19315]	4	protein_coding	-0.951152	-1.39086	-1.05826	-3.61956	-0.817866	1.5234	3.02481	-2.6652	1.10061	1.67766	-0.427085	0.558752	-4.30364	-2.04984	-2.27426	-2.4565	-2.4565	-1.19502	-1.92832	-1.93582	-0.575938	0.0973239	-2.74546	-0.780004	1.77263	-1.14382	-1.37392	-2.80583	0.0997573	2.37215	-0.243868	0.000848969	-0.941601	1.61861	-2.17046	-3.07457	-1.4384	-2.86803	2.29404	2.35611
ENSG00000050748	MAPK9	mitogen-activated protein kinase 9 [Source:HGNC Symbol;Acc:6886]	5	protein_coding	5.39577	5.19504	4.72427	4.35871	5.0406	4.93372	5.16917	4.73175	5.5181	6.2035	4.6928	5.51875	5.51131	4.47687	5.00065	4.94135	5.23308	4.99267	5.0862	4.96824	4.72493	5.38492	5.45552	4.97944	4.70394	5.86733	4.43755	4.97114	4.68379	5.16466	5.4351	5.35636	4.52413	4.59248	6.21113	4.68093	4.92072	5.5577	4.88987	5.13999
ENSG00000050767	COL23A1	collagen, type XXIII, alpha 1 [Source:HGNC Symbol;Acc:22990]	5	protein_coding	-0.314963	0.255997	0.647878	2.05799	-1.04096	1.05905	1.17784	0.402983	0.175379	0.749398	0.0366371	1.29753	0.872482	1.48372	1.92304	0.875803	0.259215	0.124268	1.67078	1.74422	0.691549	4.16715	1.20441	0.131142	0.268153	1.83351	-0.107637	0.43687	5.57739	-1.54036	0.539311	1.15649	0.373474	-0.474573	0.773176	1.40471	1.13903	2.7081	0.470416	1.47916
ENSG00000050820	BCAR1	breast cancer anti-estrogen resistance 1 [Source:HGNC Symbol;Acc:971]	16	protein_coding	7.81363	5.54155	5.66963	6.7459	6.33813	5.42593	5.95887	6.21447	5.97262	6.15516	4.9142	5.68642	6.04571	5.67644	6.25586	5.62676	6.09055	5.67176	5.99973	5.96224	4.90599	5.22477	5.72862	5.56937	6.36415	5.99855	5.96829	5.51099	4.74287	5.78278	4.5931	5.42329	5.0862	5.99195	5.28669	6.27822	6.02073	6.29574	4.69184	5.76636
ENSG00000051009	FAM160A2	family with sequence similarity 160, member A2 [Source:HGNC Symbol;Acc:25378]	11	protein_coding	5.59653	5.70438	5.84174	6.1384	5.38396	4.94008	5.68169	5.48307	4.85011	5.93742	5.21954	5.52977	5.87357	5.98769	6.10779	6.35928	5.88251	6.41008	6.31356	6.29268	5.36896	5.25431	4.49799	5.85617	5.53722	5.91864	4.89678	5.57317	5.12125	5.62163	5.44895	5.41637	5.78384	5.99598	4.84011	5.79318	5.52077	6.03779	5.28475	4.85727
ENSG00000051108	HERPUD1	homocysteine-inducible, endoplasmic reticulum stress-inducible, ubiquitin-like domain member 1 [Source:HGNC Symbol;Acc:13744]	16	protein_coding	6.29313	6.78534	6.80774	5.56116	6.90922	7.54919	7.17865	7.43952	7.82896	6.78763	8.1715	7.08002	7.18458	7.15205	7.3446	7.42592	7.30649	7.5915	8.04824	7.69066	6.23923	6.40014	6.09933	7.04471	6.90466	6.29365	6.42892	7.93758	5.30294	8.24742	6.25547	5.89689	7.42136	6.58518	6.4738	5.80423	7.0719	5.2557	9.66969	6.90077
ENSG00000051128	HOMER3	homer homolog 3 (Drosophila) [Source:HGNC Symbol;Acc:17514]	19	protein_coding	5.42217	4.78922	5.76285	5.76028	5.99153	5.70303	5.34274	5.47144	5.75852	5.81795	7.11711	5.08589	4.53691	4.88575	4.12896	3.98347	4.59248	4.38175	4.07231	4.14576	5.59444	5.66344	6.54717	4.62537	5.24103	4.95015	6.37318	4.45324	5.12775	4.12967	7.23878	4.02704	4.3365	4.6215	3.65929	6.07528	4.66072	5.45072	4.68257	6.65715
ENSG00000051180	RAD51	RAD51 recombinase [Source:HGNC Symbol;Acc:9817]	15	protein_coding	2.63101	3.28304	2.78935	2.03211	3.58415	4.20106	2.90025	1.91191	3.05108	2.4806	3.36819	2.90328	-0.977943	1.02467	-0.639129	-0.555282	0.0268566	-0.458116	-0.780004	-1.65117	3.94108	4.04248	3.4509	2.05613	3.30763	3.02408	2.70306	0.0808162	3.94372	2.15477	3.82525	4.2263	1.37424	2.84997	3.95209	3.18193	3.68833	2.81506	2.55523	2.80671
ENSG00000051341	POLQ	polymerase (DNA directed), theta [Source:HGNC Symbol;Acc:9186]	3	protein_coding	4.7422	4.24896	4.26198	5.04322	2.58014	4.43755	3.46305	3.69591	4.51995	1.98839	3.02979	3.16272	0.413516	1.632	0.869339	0.0465807	0.585397	2.02539	-0.485715	-0.119316	4.42529	4.17213	4.11493	3.39501	3.80194	3.25074	4.34692	2.26417	5.31644	3.37534	4.16932	4.86053	1.96	3.53811	4.68958	5.07636	4.92042	5.23569	4.18235	4.29243
ENSG00000051382	PIK3CB	phosphatidylinositol-4,5-bisphosphate 3-kinase, catalytic subunit beta [Source:HGNC Symbol;Acc:8976]	3	protein_coding	6.59766	5.83243	5.77774	3.63511	5.11181	5.16466	5.43177	4.91326	5.7066	4.81195	5.86188	5.69992	5.22538	5.55922	5.31282	4.84391	5.31059	4.97501	5.02702	5.00225	4.71458	5.62094	4.64689	4.82962	5.38329	4.65008	5.92808	4.53335	6.91688	6.36786	7.72017	4.75791	4.65556	5.16109	5.58149	5.43544	5.50934	5.15831	5.19535	4.92736
ENSG00000051523	CYBA	cytochrome b-245, alpha polypeptide [Source:HGNC Symbol;Acc:2577]	16	protein_coding	4.94883	6.04845	6.08756	5.87702	5.74788	7.16747	6.44552	6.11263	7.7919	4.92072	6.78763	6.54817	5.51196	5.66344	5.43975	5.96189	6.01073	6.45845	6.27017	5.43975	5.37969	6.88622	6.5637	6.25011	6.79172	5.00661	6.78417	7.55795	6.63943	6.13558	5.6397	6.97709	7.39257	5.92078	7.2227	4.22466	5.06907	5.36092	8.63767	5.43476
ENSG00000051596	THOC3	THO complex 3 [Source:HGNC Symbol;Acc:19072]	5	protein_coding	3.56032	3.9769	4.39188	3.81134	4.7749	4.45431	5.56231	3.36072	4.84262	4.96593	4.18269	4.64335	3.46439	3.92835	2.95272	3.45647	4.1788	3.9038	3.83039	3.07343	4.93678	5.31679	4.43547	4.24064	4.00432	4.62798	3.73148	4.28609	5.5257	4.7008	5.71375	5.51595	3.86501	3.47515	5.95082	4.982	4.10831	5.9269	4.34496	5.23439
ENSG00000051620	HEBP2	heme binding protein 2 [Source:HGNC Symbol;Acc:15716]	6	protein_coding	6.32224	6.43303	7.02688	2.97293	6.07138	5.7465	6.59766	6.47291	6.93439	6.98865	7.62795	6.58468	6.90341	6.90217	6.94369	6.19778	6.35081	6.38585	6.84895	6.65231	6.4847	6.62387	6.09055	6.29268	3.79461	7.13273	6.5667	6.43395	6.06831	7.45935	6.79842	7.24745	6.97211	5.76104	6.70299	7.09344	7.11297	6.63783	6.25547	6.51155
ENSG00000051825	MPHOSPH9	M-phase phosphoprotein 9 [Source:HGNC Symbol;Acc:7215]	12	protein_coding	4.42828	2.7966	3.70944	5.48646	3.986	4.6562	4.89022	4.39485	4.87697	3.84541	4.2667	3.56221	3.75843	3.49963	3.98079	3.56621	3.7158	4.03699	2.88009	3.48113	5.92765	4.00282	4.25922	4.42794	4.56231	3.92163	4.78154	4.21863	5.42758	3.76284	4.74448	5.02855	4.2979	4.09192	4.95623	4.17417	4.75244	5.34821	4.79757	4.82668
ENSG00000052126	PLEKHA5	pleckstrin homology domain containing, family A member 5 [Source:HGNC Symbol;Acc:30036]	12	protein_coding	5.01555	4.92486	5.95663	4.8059	5.44643	3.80548	4.06477	5.26584	4.66712	4.76654	4.66391	3.6692	4.51268	5.7445	5.43271	5.04749	5.19428	4.64433	4.6931	4.83282	4.73175	6.36654	5.87565	5.46139	4.27579	4.48505	4.43787	5.45766	6.67905	5.0075	4.73079	4.86251	4.52976	4.39188	5.31803	5.10094	5.19665	6.13078	4.08837	5.65185
ENSG00000052344	PRSS8	protease, serine, 8 [Source:HGNC Symbol;Acc:9491]	16	protein_coding	8.78006	7.26761	8.1715	0.709325	6.06416	7.1344	6.8003	7.10413	7.13935	7.21444	6.72117	5.69842	4.06615	8.04824	7.17593	6.87105	7.40848	6.2328	6.78645	7.08406	6.83492	7.55677	7.69889	6.16888	7.39978	6.20916	8.10035	6.63682	5.96224	7.02123	5.4203	7.209	6.23445	6.85077	5.98877	6.49417	9.04329	3.84741	6.96471	3.98197
ENSG00000052723	SIKE1	suppressor of IKBKE 1 [Source:HGNC Symbol;Acc:26119]	1	protein_coding	5.83359	6.39024	5.92543	6.60532	5.84141	5.82036	6.08378	6.36017	6.02747	5.21415	6.201	6.21865	6.07491	5.90983	6.03553	5.99456	5.83919	6.0587	5.79502	5.76462	6.15478	6.41008	5.79394	6.20142	6.17489	5.99345	6.69411	5.9293	6.71264	6.61939	5.98612	5.78917	6.16531	5.8011	6.27943	5.92155	5.92543	6.78931	5.88251	6.42441
ENSG00000052749	RRP12	ribosomal RNA processing 12 homolog (S. cerevisiae) [Source:HGNC Symbol;Acc:29100]	10	protein_coding	4.8703	6.80283	5.96115	5.30326	6.08717	5.78991	5.42217	5.25792	5.71583	6.25387	5.02357	5.87667	4.54565	5.45233	5.44433	4.92104	5.40503	4.92486	5.15451	6.1456	6.1761	5.61525	5.04688	5.43405	5.36125	4.99572	5.74273	4.64433	5.81182	5.84912	6.12722	5.53385	5.33464	5.5288	4.9508	5.81712	6.5657	5.57038	5.3023	5.5026
ENSG00000052795	FNIP2	folliculin interacting protein 2 [Source:HGNC Symbol;Acc:29280]	4	protein_coding	5.58279	5.01172	5.17465	6.42715	6.00266	5.41766	5.93601	5.27891	4.95457	5.86332	5.75682	5.00321	7.02045	5.23842	5.80972	5.49293	5.89876	5.61375	5.9293	6.33345	4.55932	4.74733	5.86822	6.15597	5.17503	5.73029	4.90629	5.2458	4.22663	5.98841	5.06691	5.84702	5.09578	6.39552	5.36092	5.79502	4.87822	5.30933	5.76359	5.76426
ENSG00000052802	MSMO1	methylsterol monooxygenase 1 [Source:HGNC Symbol;Acc:10545]	4	protein_coding	3.98816	5.14957	5.41637	4.44242	5.0439	6.3997	5.34573	5.54563	4.89911	7.36516	4.11708	6.07528	4.08942	4.96694	4.91693	4.99147	5.33499	4.8951	7.0462	4.49019	4.74892	4.9997	5.55011	5.24042	5.43053	6.4995	5.73897	4.79443	5.45422	6.6468	5.14733	4.67163	4.59633	6.13471	6.26788	5.59193	5.75424	5.36267	4.55679	5.25044
ENSG00000052841	TTC17	tetratricopeptide repeat domain 17 [Source:HGNC Symbol;Acc:25596]	11	protein_coding	5.74893	6.04336	6.36509	6.16128	5.42558	5.34604	5.76065	6.20263	6.08556	6.07056	5.56842	5.96864	5.79502	6.32687	6.14994	6.27691	6.32737	6.17451	6.10547	6.18463	6.92509	6.42715	6.64782	6.03589	5.6274	5.96189	6.3051	6.07874	6.22797	6.50922	6.14004	5.52077	6.3231	6.43395	7.12019	5.75357	5.77912	6.16667	6.42302	5.89157
ENSG00000052850	ALX4	ALX homeobox 4 [Source:HGNC Symbol;Acc:450]	11	protein_coding	-3.67997	-1.29821	3.05633	1.60677	-1.11395	4.0282	-1.7475	4.18402	0.184843	-4.74443	-1.76774	-0.0586765	3.15233	3.97042	2.65299	4.9874	2.70873	2.83648	3.24272	2.21642	3.21023	-1.14382	-0.639129	1.33716	-1.56633	-1.57895	-1.00507	1.91697	-1.28765	0.647878	-1.54675	-5.26717	1.7185	-0.531484	1.24359	3.87052	-4.983	5.5728	-2.76057	3.55487
ENSG00000053108	FSTL4	follistatin-like 4 [Source:HGNC Symbol;Acc:21389]	5	protein_coding	-2.00421	-2.17897	-1.87909	-1.22626	-3.16724	-0.737393	-0.257305	-1.4908	-1.01834	3.98079	-2.2428	-0.757209	-1.07357	-2.14308	-0.101669	-0.430949	1.94187	-0.822141	2.62149	-0.635401	-0.655136	-0.391365	1.52954	-1.3686	-3.65076	-1.87211	-2.93298	-3.20724	5.10127	-0.3337	0.793587	-2.90049	-0.228283	-1.57895	3.49474	-1.21555	-0.0938486	1.94025	-2.49148	2.10853
ENSG00000053254	FOXN3	forkhead box N3 [Source:HGNC Symbol;Acc:1928]	14	protein_coding	7.73254	5.60294	6.48379	6.93997	6.90341	7.14866	7.04471	6.80404	7.14942	5.79502	7.48297	6.98382	8.3018	6.78417	6.83174	6.94883	6.58371	6.96471	7.42016	7.39671	6.55893	6.65499	6.8723	6.97574	7.15898	6.40014	6.40739	7.08893	5.82634	6.95165	6.27437	7.50288	6.88494	6.1584	6.87574	6.09129	5.83743	6.62387	7.27921	7.25706
ENSG00000053371	AKR7A2	aldo-keto reductase family 7, member A2 (aflatoxin aldehyde reductase) [Source:HGNC Symbol;Acc:389]	1	protein_coding	6.50108	7.19933	6.61207	5.7359	5.66829	5.57147	6.00419	5.49557	5.44611	5.73555	4.89575	6.51061	6.06345	6.46617	5.6057	5.91937	6.57088	5.72499	5.61959	5.26148	6.24921	5.71855	5.88919	6.06225	5.2151	6.09323	5.19197	5.24548	5.57006	5.06074	5.60986	5.54122	5.47882	5.87218	6.07564	4.38519	5.94784	5.73423	5.00571	5.96293
ENSG00000053372	MRTO4	mRNA turnover 4 homolog (S. cerevisiae) [Source:HGNC Symbol;Acc:18477]	1	protein_coding	5.55843	6.73727	5.69673	6.45757	5.62805	5.83427	5.90736	5.35249	5.48677	5.04122	5.29401	6.3364	5.00509	5.50768	5.32087	5.20673	5.24944	4.84293	5.01243	5.51196	7.26761	5.47246	5.5518	5.79136	5.20903	5.38999	5.61128	4.6906	6.00009	4.67804	6.5579	5.68712	4.98552	5.09139	5.52305	4.81101	5.79899	6.09624	4.80231	5.83849
ENSG00000053501	USE1	unconventional SNARE in the ER 1 homolog (S. cerevisiae) [Source:HGNC Symbol;Acc:30882]	19	protein_coding	5.00691	4.49506	4.49475	4.45568	4.10869	4.09373	4.24515	4.08905	4.43623	4.68607	3.80703	4.91356	4.83314	4.31586	4.07445	4.55679	4.26094	4.00174	4.10254	4.58698	4.96363	4.02927	4.42565	4.59248	5.16371	4.12478	4.65877	4.50712	5.14446	4.68574	4.74161	4.58501	4.56779	4.50325	4.40372	4.50325	5.07798	4.67995	4.88164	4.89153
ENSG00000053524	MCF2L2	MCF.2 cell line derived transforming sequence-like 2 [Source:HGNC Symbol;Acc:30319]	3	protein_coding	-0.692532	3.18087	-0.941601	1.91353	0.976799	1.5576	0.0587703	0.480555	0.932452	0.0244288	1.16729	1.22688	-0.833917	0.296643	0.503215	-0.260093	0.497654	-0.0964117	0.246973	0.642193	0.550733	0.744419	1.16046	0.0946891	0.651773	1.59847	1.40471	1.06613	0.842875	-0.764829	0.240459	0.287995	1.17537	1.64111	3.18642	0.776595	0.653513	2.17718	2.65484	1.69628
ENSG00000053702	NRIP2	nuclear receptor interacting protein 2 [Source:HGNC Symbol;Acc:23078]	12	protein_coding	0.585397	-0.295576	1.50566	1.16997	-0.275812	0.45626	-1.10386	1.8175	0.990476	0.0117867	1.39426	0.694937	3.01362	1.85246	2.80263	3.62947	2.05875	3.48023	2.37424	3.34413	0.153273	-1.28765	-0.0229565	1.47575	1.04749	-0.4206	-1.04957	3.21422	1.43522	1.33358	-0.488977	-1.31844	3.15283	2.32819	0.718443	-0.0779919	0.999309	0.828016	0.524963	-0.955486
ENSG00000053747	LAMA3	laminin, alpha 3 [Source:HGNC Symbol;Acc:6483]	18	protein_coding	1.20824	2.52273	5.80972	3.65711	0.946574	5.7888	2.8182	5.30994	4.29757	6.65109	3.53763	4.54056	6.16283	7.5915	7.50529	7.80187	8.25249	6.8578	7.70341	7.80354	4.53952	4.3176	3.80976	6.97065	5.5288	4.32729	1.38954	5.62334	5.26357	5.28475	1.74422	1.84336	5.95559	5.08246	6.62503	4.61473	3.09369	5.33297	5.47712	4.28883
ENSG00000053770	AP5M1	adaptor-related protein complex 5, mu 1 subunit [Source:HGNC Symbol;Acc:20192]	14	protein_coding	5.2851	4.42565	5.09828	5.57635	5.20934	5.28017	5.11148	4.94664	4.9633	6.01926	5.19043	5.41062	5.37253	4.99905	5.37937	5.45689	5.60016	5.17404	5.21446	5.37253	4.55612	4.79538	4.59762	5.68201	5.03684	5.75357	4.58728	5.13475	5.03552	5.14163	5.08154	6.0181	4.97248	5.09262	5.5432	4.74799	5.67	4.5941	5.23149	4.58501
ENSG00000053900	ANAPC4	anaphase promoting complex subunit 4 [Source:HGNC Symbol;Acc:19990]	4	protein_coding	5.6571	3.60782	4.07268	4.36645	4.02127	4.62667	4.02553	4.89319	4.58667	4.49639	4.46665	3.86628	4.09617	4.10254	4.63884	4.36145	4.35505	4.60472	4.25855	4.38989	4.14263	3.84122	2.71319	4.18061	4.10184	3.55443	3.63553	4.5206	4.07042	4.21904	4.51044	4.41736	4.42468	4.31694	3.83078	4.18028	3.17977	4.19383	4.2979	4.14013
ENSG00000053918	KCNQ1	potassium voltage-gated channel, KQT-like subfamily, member 1 [Source:HGNC Symbol;Acc:6294]	11	protein_coding	2.00722	2.43557	3.92502	3.47383	2.71119	2.90085	4.73395	2.41907	3.39018	3.81948	2.8878	4.18969	3.10907	3.5872	3.37534	2.14255	3.42035	3.26875	3.57629	2.75561	2.33103	4.4622	4.15638	2.60195	2.34024	5.34539	2.28591	2.92396	3.21517	4.29243	2.39904	3.00343	3.38832	2.41479	3.76246	2.52402	2.85661	2.11767	3.41246	3.29383
ENSG00000054116	TRAPPC3	trafficking protein particle complex 3 [Source:HGNC Symbol;Acc:19942]	1	protein_coding	6.47187	5.88665	6.00569	5.17897	5.03999	5.52171	5.37056	5.08186	6.04208	5.35833	5.88122	6.10742	5.57459	5.69673	5.40154	5.18976	5.72167	4.96623	5.3528	5.31609	6.67591	6.79356	5.36931	5.76599	5.12518	5.08845	5.46705	5.17273	5.9446	5.49733	5.89476	5.14128	5.56328	5.27923	6.49313	4.89153	5.71269	5.25792	5.97118	5.89876
ENSG00000054118	THRAP3	thyroid hormone receptor associated protein 3 [Source:HGNC Symbol;Acc:22964]	1	protein_coding	7.31041	7.05842	7.22996	7.25706	6.63075	7.12095	7.19851	6.7966	7.42136	6.94077	7.12256	7.05767	6.93094	7.27242	7.22369	7.24745	7.50164	7.07282	7.30037	7.15367	7.76579	7.67902	7.24362	7.53073	7.1344	7.19514	7.0037	7.23965	7.51651	7.13519	7.47727	7.51651	7.53562	7.08634	7.53309	7.05235	6.88494	7.78531	7.29265	6.99477
ENSG00000054148	PHPT1	phosphohistidine phosphatase 1 [Source:HGNC Symbol;Acc:30033]	9	protein_coding	5.91496	5.51332	4.6777	5.27016	6.10864	6.06225	6.74408	5.64047	5.61525	5.87046	6.01036	5.23149	6.40293	5.20872	5.90626	5.53852	6.04607	5.45386	5.54708	5.3986	6.27862	4.77801	5.03078	6.8204	5.97298	6.40785	6.06	6.19253	6.26356	5.21187	5.07901	7.01102	6.02702	6.38755	6.05646	5.93855	6.33895	6.15441	6.31702	7.50039
ENSG00000054179	ENTPD2	ectonucleoside triphosphate diphosphohydrolase 2 [Source:HGNC Symbol;Acc:3364]	9	protein_coding	3.89415	3.11939	4.41382	0.778367	3.49336	4.24652	4.90099	3.12364	2.64802	5.67276	4.3042	3.64898	1.20049	3.91202	3.2072	4.37048	5.07669	2.89903	3.72054	4.41019	4.32246	2.28075	4.05508	2.8015	3.37901	4.75759	4.4398	1.83351	5.90376	4.08733	1.52751	4.83031	3.39916	5.78954	7.6426	4.90538	6.01686	1.58283	0.0166287	0.144279
ENSG00000054219	LY75	lymphocyte antigen 75 [Source:HGNC Symbol;Acc:6729]	2	protein_coding	5.57837	7.09683	5.34604	4.57494	6.29268	5.98016	4.56941	5.57739	5.50391	4.1022	6.01847	5.00033	4.18792	6.30451	6.1284	6.05789	4.64205	6.01885	6.01885	6.22667	4.80838	5.52977	4.34864	5.57006	5.73291	5.31477	5.22079	5.87633	5.37056	4.25855	5.86519	3.74481	6.42392	5.06597	3.23492	4.27202	3.46305	1.82017	6.36654	4.89779
ENSG00000054267	ARID4B	AT rich interactive domain 4B (RBP1-like) [Source:HGNC Symbol;Acc:15550]	1	protein_coding	5.26584	5.81633	6.57886	6.48194	6.01	6.1524	6.22275	6.33092	6.57886	6.21363	6.60337	6.13513	5.63542	6.64627	6.16846	6.29574	6.31271	6.42588	6.23645	6.10163	6.52344	6.5209	6.79718	6.62976	6.10819	5.74204	6.02979	6.61101	6.71085	6.41187	6.10779	6.5336	6.63226	6.16088	5.8495	6.6007	6.51896	6.7678	6.38115	6.21538
ENSG00000054277	OPN3	opsin 3 [Source:HGNC Symbol;Acc:14007]	1	protein_coding	2.35462	4.7168	5.07065	3.89653	4.50552	4.73267	4.7537	4.30453	5.65252	6.14522	3.47232	4.90289	2.4197	4.64947	3.00287	3.47334	3.01467	3.01519	2.77381	2.30981	5.30964	5.38565	4.9874	4.83381	4.75759	5.04356	5.93527	3.36121	4.76592	4.78247	4.92769	2.83417	3.57543	4.17001	3.55572	4.19786	3.4138	3.63637	3.23807	3.34106
ENSG00000054282	SDCCAG8	serologically defined colon cancer antigen 8 [Source:HGNC Symbol;Acc:10671]	1	protein_coding	3.47281	3.79584	4.89809	3.7872	4.22937	4.27478	4.17833	4.19314	4.70111	4.15102	3.99883	3.73788	3.96223	4.30185	3.91541	4.07115	4.24313	4.26433	3.75884	3.78957	4.61924	4.91916	5.05981	4.6928	4.69373	4.43379	5.27825	4.50615	4.70585	4.73931	4.59538	4.73582	4.77047	4.70363	4.21296	5.66691	4.53631	5.34697	4.62505	3.99962
ENSG00000054356	PTPRN	protein tyrosine phosphatase, receptor type, N [Source:HGNC Symbol;Acc:9676]	2	protein_coding	0.702591	2.53395	2.6336	2.43772	3.32367	1.08495	0.793587	2.07774	-2.06031	1.59641	-2.14308	0.568145	-1.52052	-3.26867	-2.636	2.64354	-0.89958	-3.45671	-4.05566	-4.14623	-0.374376	0.173024	0.969433	-3.11227	0.901969	1.75008	2.42232	0.0587703	-1.11864	-3.31107	-0.933024	0.589222	-2.73246	-0.32394	2.37066	-0.655136	-0.718292	-1.46728	-0.885774	0.29009
ENSG00000054392	HHAT	hedgehog acyltransferase [Source:HGNC Symbol;Acc:18270]	1	protein_coding	4.61343	2.2443	3.62613	4.90599	1.96334	4.36579	3.35274	2.83713	3.54224	3.40358	3.35274	2.85661	2.17718	3.89133	3.88537	3.31194	4.64689	3.21023	3.64643	3.83713	3.56712	2.39771	3.53164	2.72702	3.53856	3.16069	3.09737	2.55325	4.07866	3.62904	3.53209	3.99666	3.00287	2.79843	3.59041	2.37356	2.05374	4.43279	2.06743	2.62023
ENSG00000054523	KIF1B	kinesin family member 1B [Source:HGNC Symbol;Acc:16636]	1	protein_coding	7.06162	7.54442	7.10883	6.84709	6.64939	6.45153	6.93375	6.13513	6.76082	6.65665	6.12488	6.56152	6.75656	6.86976	6.98449	6.86913	6.43486	6.63517	6.61678	6.93928	8.39257	7.47106	7.33488	6.56985	6.48959	6.93439	6.91688	6.25139	6.41646	6.43438	7.47328	7.26856	6.69467	6.74408	6.94077	7.0848	6.99861	6.96542	6.22235	7.22369
ENSG00000054598	FOXC1	forkhead box C1 [Source:HGNC Symbol;Acc:3800]	6	protein_coding	8.51868	7.68342	6.74825	5.99744	5.88919	3.65971	2.79476	6.74825	6.42588	3.4877	7.16829	7.71864	5.1526	6.34107	6.16326	5.32898	4.47109	6.05491	5.77321	6.06452	8.18102	6.01686	7.76902	4.46321	7.70341	7.04692	8.67987	6.40739	7.21703	3.53763	8.77621	7.72017	7.02835	4.07975	3.58635	7.38923	3.18087	8.56366	5.05211	5.23116
ENSG00000054611	TBC1D22A	TBC1 domain family, member 22A [Source:HGNC Symbol;Acc:1309]	22	protein_coding	4.7537	5.3125	5.4637	6.03666	5.51066	5.85102	5.66344	5.24164	5.94425	5.40217	6.19462	5.28149	5.15354	5.23245	5.00883	4.68539	4.91141	4.87571	4.75497	4.99416	5.17834	6.03371	5.87702	5.02979	4.76305	5.09172	4.852	5.40601	5.85544	5.41766	5.44505	5.65056	5.63054	5.18976	5.23022	4.9997	5.19075	4.92319	5.71618	5.0318
ENSG00000054654	SYNE2	spectrin repeat containing, nuclear envelope 2 [Source:HGNC Symbol;Acc:17084]	14	protein_coding	9.66206	7.87077	8.47828	8.49987	8.64809	9.77351	9.0527	8.55714	9.62462	8.78006	9.89651	9.75694	8.60688	9.0862	9.63201	9.35392	9.41478	9.66206	9.25112	9.43362	9.18683	10.0986	10.2152	9.73251	9.81598	8.22238	9.0386	9.29013	9.26769	8.9747	10.0446	9.90581	9.39009	9.55997	8.40694	10.1097	8.56693	9.43362	9.34799	6.65337
ENSG00000054690	PLEKHH1	pleckstrin homology domain containing, family H (with MyTH4 domain) member 1 [Source:HGNC Symbol;Acc:17733]	14	protein_coding	6.93375	2.99724	3.73108	4.07655	2.75623	4.55773	3.58197	3.24775	2.14477	4.66359	2.86193	4.37215	3.08463	3.5649	4.48439	4.30973	4.30525	3.41844	3.39062	3.56176	4.39454	3.4031	4.38924	2.61629	4.869	3.81017	4.43883	3.66702	4.07582	4.01792	3.15388	4.8593	2.70742	4.19652	4.263	5.23504	4.11641	2.88942	2.11614	1.68335
ENSG00000054793	ATP9A	ATPase, class II, type 9A [Source:HGNC Symbol;Acc:13540]	20	protein_coding	7.46843	6.99261	7.47843	4.9842	5.11413	6.00926	6.1718	6.70069	7.0037	6.71191	6.64047	6.50624	7.7341	7.55677	6.66711	6.61939	6.92027	6.28275	6.8723	6.92633	6.88494	6.56264	7.77063	5.58851	7.90561	7.12945	7.26761	6.02466	5.3528	6.8584	6.40293	6.99477	5.81423	6.19293	6.74938	6.81087	6.23963	6.56096	4.59507	6.01686
ENSG00000054803	CBLN4	cerebellin 4 precursor [Source:HGNC Symbol;Acc:16231]	20	protein_coding	0.666528	-2.69094	0.249382	2.19019	-0.761069	-1.58616	0.424053	0.298722	-1.1708	1.89256	-1.22094	-2.86803	1.70515	-0.714648	0.0918104	2.12504	2.33324	1.46528	5.76462	1.49924	-3.18784	-1.90926	0.450123	-2.21548	-0.711151	-1.40959	-3.00237	0.198828	-3.74512	2.59596	-0.455057	-0.72573	0.0389864	0.184843	-2.01333	0.684193	-0.2787	3.90775	-1.14382	-1.13318
ENSG00000054938	CHRDL2	chordin-like 2 [Source:HGNC Symbol;Acc:24168]	11	protein_coding	0.598654	-2.69094	1.15394	0.470416	-2.04984	-1.33999	-3.777	4.1574	-0.795845	-2.537	-0.711151	-2.17046	-3.65076	-1.54036	-2.40138	-2.98207	-1.61912	-3.61956	-2.79053	-2.10589	-1.69266	-1.85558	-2.04123	-1.67862	6.63226	-2.56157	0.6462	1.93591	-2.01333	-2.70614	-2.04984	0.919667	2.49502	-0.0205419	-3.67997	6.76304	-1.89461	0.969433	2.68234	3.3696
ENSG00000054965	FAM168A	family with sequence similarity 168, member A [Source:HGNC Symbol;Acc:28999]	11	protein_coding	7.6141	6.8192	7.19851	7.13183	6.33391	5.90125	6.31356	7.06639	6.2735	6.6281	6.84835	6.40873	6.61207	7.00965	6.75421	6.58371	6.49609	6.63463	6.76978	6.64178	6.67487	6.9523	7.22456	6.5185	6.97211	6.22155	7.42489	6.55532	6.26314	6.81274	6.62446	7.08634	6.40785	7.33089	5.79468	6.49521	6.50439	6.72677	5.67682	6.9113
ENSG00000054967	RELT	RELT tumor necrosis factor receptor [Source:HGNC Symbol;Acc:13764]	11	protein_coding	4.14677	3.77467	3.27997	4.76561	4.44335	4.3238	3.82261	4.11385	4.51302	3.88218	4.22697	3.87626	3.3466	2.16825	3.47888	2.96396	1.73369	4.37575	3.09676	3.89996	4.52976	4.23927	4.63651	4.25282	4.2979	3.12309	4.55133	4.60634	5.03581	3.5965	3.9769	4.04388	4.85866	5.25855	3.55443	3.96854	3.68976	4.35	5.22507	4.50483
ENSG00000054983	GALC	galactosylceramidase [Source:HGNC Symbol;Acc:4115]	14	protein_coding	5.00065	3.83871	4.10869	3.61317	4.9817	4.6755	3.96779	4.25791	4.47747	4.45059	4.69091	4.24132	4.88637	4.29588	4.10954	4.51571	4.68125	4.50257	4.43916	4.53602	4.24756	3.48023	3.26357	4.48372	5.3874	4.5792	4.269	3.85447	3.49695	3.58862	4.32763	3.01862	3.27066	4.38275	3.99079	3.78204	3.81986	3.95738	4.24031	4.3955
ENSG00000055044	NOP58	NOP58 ribonucleoprotein [Source:HGNC Symbol;Acc:29926]	2	protein_coding	5.08312	6.12209	5.17602	6.55479	5.10677	5.3923	5.26791	5.72235	5.79605	5.54222	5.0569	5.59095	4.67328	5.14477	5.43085	5.20091	4.94541	4.80231	5.27111	5.61165	6.81567	6.04725	5.89876	5.60884	5.96973	5.51131	6.34553	5.48811	5.90519	5.23606	6.20182	5.67374	6.1094	5.77984	5.50326	6.21865	5.98016	6.14952	5.81216	4.52383
ENSG00000055070	SZRD1	SUZ RNA binding domain containing 1 [Source:HGNC Symbol;Acc:30232]	1	protein_coding	7.02385	7.32067	6.70409	6.99641	6.46465	6.92895	6.88817	6.65006	6.77517	6.7459	6.52682	7.22456	6.83492	6.83877	6.78129	6.73386	6.67799	6.5579	6.85077	6.76441	7.63993	6.48516	6.83877	7.0366	6.45568	6.75543	6.73005	6.59567	6.97641	6.27901	6.9257	7.1865	6.67851	6.41467	6.57088	5.90663	7.01172	7.49911	6.48289	7.50757
ENSG00000055118	KCNH2	potassium voltage-gated channel, subfamily H (eag-related), member 2 [Source:HGNC Symbol;Acc:6251]	7	protein_coding	-5.26717	2.58469	0.157904	2.85234	-1.05826	1.31429	-2.74546	-1.87211	1.99349	-0.185086	-0.364664	-1.45059	-2.57298	-0.555282	-0.722207	-0.768432	-0.199483	-0.397283	0.507083	-1.3686	-0.320671	3.72743	-1.06269	-2.16052	-1.24157	2.98655	-2.22457	-0.825923	4.38553	-0.929116	2.68016	5.87145	-0.531484	-1.25113	5.91311	1.89426	-1.69266	1.33716	0.0918104	0.369061
ENSG00000055130	CUL1	cullin 1 [Source:HGNC Symbol;Acc:2551]	7	protein_coding	4.41865	5.91937	5.86044	5.89876	5.58604	6.16629	5.65056	5.52844	5.94894	6.01885	6.0165	6.03553	5.64407	5.75316	5.44401	5.35669	5.39479	5.46174	5.45035	5.49669	6.40654	6.09439	4.96363	5.5474	5.61592	5.47515	5.72062	5.791	6.10589	5.79029	6.42212	5.75357	5.85392	5.63577	5.46174	5.95702	4.69434	5.6156	5.81757	5.62708
ENSG00000055147	FAM114A2	family with sequence similarity 114, member A2 [Source:HGNC Symbol;Acc:1333]	5	protein_coding	4.01184	3.46305	3.5473	3.40012	3.83713	4.45906	4.57141	3.73066	3.65929	4.32551	4.20694	4.16572	4.72786	4.00954	3.87866	4.09013	4.19933	3.95289	3.83474	4.05656	3.86334	4.06024	3.99264	3.80588	4.12967	4.54156	3.57184	4.19416	3.89775	3.89335	3.62354	4.1928	4.12076	3.97349	4.24167	2.69861	3.71888	3.87383	4.41903	4.16261
ENSG00000055163	CYFIP2	cytoplasmic FMR1 interacting protein 2 [Source:HGNC Symbol;Acc:13760]	5	protein_coding	2.62342	6.35038	3.69155	3.62056	5.52439	4.93532	3.86415	5.27172	4.9892	3.78357	5.55076	4.3507	2.67092	3.56305	4.86603	4.85727	4.32315	5.20773	4.58086	4.13575	3.7337	4.62698	3.3096	3.92502	3.69757	6.05681	5.21798	6.00885	4.963	3.64437	2.90691	6.10864	6.57289	4.33017	6.07639	4.38455	2.54809	2.89222	5.99028	4.11569
ENSG00000055208	TAB2	TGF-beta activated kinase 1/MAP3K7 binding protein 2 [Source:HGNC Symbol;Acc:17075]	6	protein_coding	6.27862	5.85793	6.31311	6.09705	6.42212	6.40696	6.12764	6.61729	6.67216	6.3256	6.48791	6.19216	6.04798	6.43947	6.50001	6.23683	6.16629	6.09284	6.37495	5.90519	6.18893	6.4317	6.45199	6.09362	5.95117	6.67969	6.43758	6.46617	6.40785	6.50108	6.36145	6.82538	6.56313	6.46663	6.79592	6.39736	6.62144	6.87373	6.58518	6.72397
ENSG00000055211	GINM1	glycoprotein integral membrane 1 [Source:HGNC Symbol;Acc:21074]	6	protein_coding	5.02855	5.40733	5.37709	4.42207	5.76146	5.04422	5.29863	5.56295	4.95712	5.32604	5.09172	4.85417	6.31007	5.42593	5.72862	5.83957	5.93172	5.19395	5.75639	5.72994	4.58372	4.94821	5.61055	5.18646	5.5	5.907	5.30994	5.82819	4.76068	5.57179	4.89022	6.20182	5.51066	5.45833	6.64476	5.72959	6.25632	5.55342	5.33537	5.71479
ENSG00000055332	EIF2AK2	eukaryotic translation initiation factor 2-alpha kinase 2 [Source:HGNC Symbol;Acc:9437]	2	protein_coding	5.31929	7.31971	6.86705	6.43758	7.96662	7.04395	6.62503	6.40336	8.18102	7.00229	6.91326	6.90077	6.62759	6.81508	6.6131	7.15983	6.51106	7.0592	7.40741	6.56874	7.09853	7.4373	7.09196	6.2328	7.59875	6.63463	6.96136	7.02123	6.6582	6.39686	7.20016	6.6468	6.93997	7.09344	6.76918	6.4773	6.32958	6.72183	7.65078	6.99335
ENSG00000055483	USP36	ubiquitin specific peptidase 36 [Source:HGNC Symbol;Acc:20062]	17	protein_coding	5.58505	6.1193	6.28793	6.41646	5.8011	5.73291	5.86972	6.04246	6.12245	5.25299	6.03274	5.84174	5.82886	6.00153	6.27396	5.72714	5.88172	6.25428	6.00303	6.52778	7.07838	7.16323	5.88953	5.62575	5.88841	5.30774	6.04533	5.94675	5.51465	5.6992	7.14942	5.70951	6.45153	5.64854	5.42494	7.10565	7.03269	6.5667	5.70837	5.70167
ENSG00000055609	KMT2C	lysine (K)-specific methyltransferase 2C [Source:HGNC Symbol;Acc:13726]	7	protein_coding	8.25249	7.93531	9.0527	9.32453	8.08928	9.17641	8.52501	8.53776	8.87178	8.87592	9.15583	8.90099	7.67902	8.80339	8.65158	8.58675	8.39257	8.64809	8.37556	8.29915	8.8884	8.7161	8.18341	8.83514	8.16677	7.29265	8.38688	9.0527	7.95685	9.39009	9.02465	8.56366	8.81521	8.79557	7.70795	8.94386	8.21497	8.24489	8.52818	7.76258
ENSG00000055732	MCOLN3	mucolipin 3 [Source:HGNC Symbol;Acc:13358]	1	protein_coding	2.47799	4.55098	0.102003	3.52275	0.303584	1.69427	1.59208	1.645	3.01633	0.411553	1.15773	1.93143	3.56078	1.63296	2.80729	1.36239	1.48912	1.9816	1.95149	2.98084	1.00851	3.67644	3.39062	1.33592	0.14175	2.04514	-1.83147	1.0205	3.28905	0.9241	0.325374	2.65416	1.20961	1.61252	2.52929	2.32006	0.447518	3.79417	0.714716	2.11767
ENSG00000055813	CCDC85A	coiled-coil domain containing 85A [Source:HGNC Symbol;Acc:29400]	2	protein_coding	0.9526	-0.131824	-0.468076	0.0973239	-0.511978	-1.4908	-0.202506	-0.438711	-1.61318	2.78392	1.251	1.37074	5.0967	1.72149	1.24227	1.31674	2.35537	2.04684	1.87629	3.78319	-1.02771	-0.569099	-0.364664	2.13248	1.29336	0.441092	-0.17392	0.249382	0.824368	1.24852	1.95921	0.552957	0.624215	2.03398	1.93317	1.50462	0.986157	3.02301	-0.190424	-0.38477
ENSG00000055917	PUM2	pumilio RNA-binding family member 2 [Source:HGNC Symbol;Acc:14958]	2	protein_coding	4.61311	6.95647	7.23366	6.64578	7.40078	6.99108	7.3188	7.24362	7.30251	6.67269	7.06162	7.04544	6.89297	7.56162	7.30251	7.42712	7.444	7.24179	7.27056	7.04692	7.21528	7.22996	7.49552	6.67642	6.62759	7.11786	7.15026	7.28191	7.61981	7.21528	7.09764	7.34885	7.17783	6.96069	7.80354	6.85404	6.76381	6.98719	6.94369	6.86516
ENSG00000055950	MRPL43	mitochondrial ribosomal protein L43 [Source:HGNC Symbol;Acc:14517]	10	protein_coding	4.06798	5.39546	4.26932	3.95173	4.74636	4.20208	4.10954	4.19753	4.02515	4.66776	4.27167	4.64369	4.79879	4.39423	4.55196	4.36645	4.7678	4.10072	4.4057	4.09809	4.62959	4.74478	4.53443	4.5782	4.95144	4.23044	4.97339	4.71618	4.9747	4.51634	4.77553	5.04976	4.51571	4.50973	4.90538	4.2962	5.43405	4.58728	4.48925	4.71357
ENSG00000055955	ITIH4	inter-alpha-trypsin inhibitor heavy chain family, member 4 [Source:HGNC Symbol;Acc:6169]	3	protein_coding	2.21026	1.65493	0.244885	1.87266	0.0413281	0.763029	1.76236	1.74014	1.43059	0.0465807	1.50886	1.19923	4.92552	0.812923	2.75007	2.21417	2.18539	2.79599	0.781617	2.09485	1.31429	0.253677	0.0244288	3.32172	0.836407	1.59309	0.558752	1.78765	0.833085	3.66134	1.80537	0.392776	2.98204	2.87775	0.347137	1.51591	1.46983	1.54372	3.34896	2.74037
ENSG00000056050	C4orf27	chromosome 4 open reading frame 27 [Source:HGNC Symbol;Acc:26051]	4	protein_coding	2.52729	3.23339	2.49039	3.1418	2.78336	2.50323	3.06992	1.67362	2.14255	2.18684	2.41839	3.29187	3.17269	2.11196	2.97763	2.08033	2.23921	2.35933	2.89389	1.93232	3.27586	2.75203	3.97468	2.38798	3.35036	3.26875	3.09369	2.65238	3.80507	2.04929	3.29383	4.62831	2.87063	3.50718	3.48472	3.32367	3.07774	3.05325	2.86363	3.73667
ENSG00000056097	ZFR	zinc finger RNA binding protein [Source:HGNC Symbol;Acc:17277]	5	protein_coding	6.54155	6.68487	6.9066	6.0799	6.09403	6.0165	6.34998	6.43213	6.39827	5.80037	6.35038	6.45656	6.14793	6.58371	6.20142	6.35739	6.25469	6.14161	6.197	6.35563	6.29406	6.56003	6.46815	6.30568	6.75242	6.47187	6.99477	6.37495	6.42167	6.51896	5.68506	6.58928	6.71949	6.08675	6.68758	6.28275	6.97421	6.26017	6.24047	6.57553
ENSG00000056277	ZNF280C	zinc finger protein 280C [Source:HGNC Symbol;Acc:25955]	X	protein_coding	2.93816	2.88063	4.06329	3.81017	2.55908	2.64165	2.65357	3.27586	2.87354	1.78227	2.46377	2.34964	2.88314	3.16693	2.53528	2.35097	2.30131	2.05613	2.45986	2.58851	3.28963	3.72416	3.74635	2.67092	2.95109	2.54548	3.79073	2.60195	4.14885	3.18543	3.33736	3.16909	2.28075	2.51566	3.91615	4.62992	3.17219	3.66051	2.81762	3.87343
ENSG00000056558	TRAF1	TNF receptor-associated factor 1 [Source:HGNC Symbol;Acc:12031]	9	protein_coding	4.14438	4.2147	3.91084	5.96293	4.85042	4.99572	4.72264	5.72677	5.84531	4.90352	5.62541	4.82547	3.61191	4.44502	5.77774	4.90752	3.7124	6.22275	4.58728	4.5782	4.0558	4.63767	3.19364	5.14446	4.56199	4.99939	4.57524	6.21406	8.40983	4.47141	4.49188	3.69114	6.75543	5.75248	2.97467	4.49925	3.45693	4.60116	6.13721	4.32589
ENSG00000056586	RC3H2	ring finger and CCCH-type domains 2 [Source:HGNC Symbol;Acc:21461]	9	protein_coding	5.73753	6.30911	6.25179	6.87765	6.37135	6.69632	6.52251	6.51203	6.56213	6.04645	6.60895	6.3166	6.37088	6.33813	6.64939	6.66595	6.27479	6.74245	6.23842	6.46912	6.43438	6.72344	7.24544	6.28113	5.91608	7.21827	6.88368	6.4276	6.34456	6.12209	6.66595	6.96069	6.4263	6.47091	7.37462	6.4753	5.97689	7.1446	6.50294	6.62092
ENSG00000056661	PCGF2	polycomb group ring finger 2 [Source:HGNC Symbol;Acc:12929]	17	protein_coding	4.15773	3.60194	3.1602	3.30814	4.5036	3.93876	3.98852	4.10433	3.32073	3.04545	3.64437	3.45039	4.79757	4.0274	4.3507	4.47237	4.55998	4.12076	4.36548	4.47109	4.44732	4.97979	4.89246	4.09226	4.86603	4.4031	4.54023	4.04352	4.48537	4.2962	4.90692	4.36878	3.80157	4.10147	5.11742	4.57752	4.65684	4.59344	3.32412	4.40671
ENSG00000056736	IL17RB	interleukin 17 receptor B [Source:HGNC Symbol;Acc:18015]	3	protein_coding	6.02111	4.16427	3.50196	2.01484	5.03246	1.05033	1.5306	3.21272	3.47383	-0.352689	4.11205	2.33947	0.618677	2.25295	4.33313	3.33998	5.9179	3.44018	3.01146	2.98031	4.43183	3.99996	3.93138	2.03897	3.87264	2.51157	2.70937	2.2772	5.81633	2.39424	5.26712	-0.447737	2.3576	2.4871	3.76365	3.43608	4.18302	0.903997	1.76055	-0.662245
ENSG00000056972	TRAF3IP2	TRAF3 interacting protein 2 [Source:HGNC Symbol;Acc:1343]	6	protein_coding	4.0779	5.29206	4.69658	2.55713	4.61183	4.39361	5.49733	5.64144	4.60309	5.04976	4.35103	4.34219	4.62278	4.94722	5.42653	5.22079	4.8683	4.66455	4.93678	5.0484	4.76104	4.4755	4.76748	4.75698	3.65286	4.33313	4.96239	4.27044	4.679	5.20673	5.21887	5.03111	4.77202	5.02547	5.29599	3.35473	4.95296	4.95742	4.27478	5.67854
ENSG00000056998	GYG2	glycogenin 2 [Source:HGNC Symbol;Acc:4700]	X	protein_coding	-0.447737	4.86053	3.17774	3.67436	1.88729	2.08184	3.66011	2.49704	1.54372	3.82607	2.46704	2.48774	8.38404	3.56221	2.32006	3.83039	3.44805	3.58862	3.57978	5.86401	1.2572	3.30865	4.36517	3.21979	5.53111	2.88995	2.35462	3.9477	2.43848	5.27111	1.99266	1.79713	1.24852	0.640505	2.91033	1.52853	2.47241	3.02095	2.11919	3.19157
ENSG00000057019	DCBLD2	discoidin, CUB and LCCL domain containing 2 [Source:HGNC Symbol;Acc:24627]	3	protein_coding	5.78744	4.50877	5.80712	6.28881	5.7824	4.38421	4.29011	5.624	4.91171	4.97589	5.07243	6.32085	5.75639	5.25238	5.62541	5.47414	4.98327	5.15704	5.25108	5.35802	5.00984	5.93069	4.78348	5.07125	6.48791	5.59444	5.97118	5.10805	7.16667	4.57686	4.26469	5.51258	5.00353	4.69025	5.90125	5.39162	4.04136	5.90376	4.32658	6.39238
ENSG00000057252	SOAT1	sterol O-acyltransferase 1 [Source:HGNC Symbol;Acc:11177]	1	protein_coding	5.50294	5.14128	5.94821	5.99491	5.61959	6.74245	5.78312	5.53385	6.1384	4.83819	6.43395	6.37926	5.29863	5.18288	5.2458	5.09907	4.84011	5.5288	5.03552	5.37548	5.57494	5.5951	5.47246	5.47178	5.36267	5.47552	6.36509	5.45902	5.94043	4.64078	5.83102	4.89055	6.01431	4.70785	4.17108	5.03522	5.76754	5.61488	6.08636	5.96562
ENSG00000057294	PKP2	plakophilin 2 [Source:HGNC Symbol;Acc:9024]	12	protein_coding	5.27986	5.62094	6.14793	2.87833	6.41837	4.64433	5.78165	4.24861	5.0862	5.33742	5.25175	4.59214	3.87219	6.3196	5.25505	4.74832	5.91972	3.81712	5.18422	5.7189	4.50392	5.53416	4.45025	4.08264	4.70332	3.57896	4.81317	4.58728	7.04247	4.98955	5.07539	4.14991	4.29174	4.57141	5.24517	5.76494	7.30345	2.65822	5.04222	2.628
ENSG00000057608	GDI2	GDP dissociation inhibitor 2 [Source:HGNC Symbol;Acc:4227]	10	protein_coding	8.25758	7.50529	7.39671	6.04845	7.52515	8.54419	8.22238	7.42489	8.50924	9.63201	8.57351	7.49168	6.96673	7.14298	6.88883	7.12614	7.25319	7.00158	6.98186	6.90077	9.35987	8.25758	8.02516	8.03769	7.60296	7.74665	8.08928	7.65825	7.23709	7.72325	7.9627	7.96662	7.84105	7.44794	7.28861	7.43952	7.90932	7.42016	7.89456	7.77225
ENSG00000057657	PRDM1	PR domain containing 1, with ZNF domain [Source:HGNC Symbol;Acc:9346]	6	protein_coding	4.45568	5.14225	5.22245	3.85327	6.20142	6.24209	6.01431	5.80001	6.27563	5.45998	6.40014	5.84912	6.20223	4.95922	5.51367	5.36962	4.90383	5.86776	5.02188	5.69881	3.03143	4.69531	4.36042	4.88073	4.98109	5.18288	5.08589	5.95629	4.73142	5.01752	4.91071	5.07306	6.07411	5.2267	5.88378	3.92988	4.8348	3.82525	8.93517	5.60884
ENSG00000057663	ATG5	autophagy related 5 [Source:HGNC Symbol;Acc:589]	6	protein_coding	4.05805	5.34821	4.88669	4.6504	5.14477	5.09548	5.93352	5.15354	5.6721	4.94104	4.83217	4.7008	4.46986	4.63283	4.34254	4.32511	4.81756	4.38619	4.60988	4.24579	5.19565	4.83031	4.84233	4.2911	4.33717	5.11577	4.7008	4.25045	5.53289	5.03999	4.98078	5.30066	4.67643	4.56033	5.45998	4.29757	4.86021	4.76622	5.09387	5.40962
ENSG00000057704	TMCC3	transmembrane and coiled-coil domain family 3 [Source:HGNC Symbol;Acc:29199]	12	protein_coding	2.26342	2.97229	2.38872	3.55487	2.88128	4.23488	4.6215	3.43044	2.41907	4.60019	4.942	3.74716	4.89744	3.58154	3.90775	4.54664	3.85288	4.58278	4.45395	4.26335	2.45986	3.97727	2.51566	3.90815	2.53863	3.2666	2.70046	3.81017	3.21023	4.18235	3.91577	1.96418	4.19688	3.93532	2.2025	3.15972	2.04069	2.31185	3.7492	3.51636
ENSG00000057757	PITHD1	PITH (C-terminal proteasome-interacting domain of thioredoxin-like) domain containing 1 [Source:HGNC Symbol;Acc:25022]	1	protein_coding	6.32131	6.38309	5.15704	5.89945	5.13774	4.70815	5.28637	5.20347	5.04222	5.71922	5.22924	6.29268	5.66725	5.31282	5.01108	5.26148	5.34099	5.15322	5.53617	5.31345	6.21363	5.62163	5.81463	5.87425	4.81037	5.26179	5.4637	5.41126	5.6057	5.0987	6.11338	5.27016	5.52911	5.85289	5.81757	4.42694	5.91162	5.67035	5.40278	5.71922
ENSG00000057935	MTA3	metastasis associated 1 family, member 3 [Source:HGNC Symbol;Acc:23784]	2	protein_coding	5.25952	4.92552	5.40601	3.89886	4.90131	6.03666	5.67541	3.64724	5.52206	5.50866	4.1556	4.79347	4.88073	5.43405	4.76716	5.07306	5.42329	4.88385	4.83819	4.68093	5.66553	5.94112	4.18615	4.96363	5.08496	5.35215	5.60538	4.91756	5.7575	5.44895	5.86295	4.99872	4.76005	4.86155	6.09705	5.30166	5.37937	4.79979	4.28411	5.62676
ENSG00000058056	USP13	ubiquitin specific peptidase 13 (isopeptidase T-3) [Source:HGNC Symbol;Acc:12611]	3	protein_coding	4.97148	5.68994	5.53992	6.52778	4.42042	4.14746	4.12441	4.74096	5.91203	3.80976	4.49019	3.63962	5.44572	4.96526	4.73966	4.43151	4.3955	4.2817	4.37144	4.52353	5.78675	5.97415	5.55922	3.9038	5.49219	3.55268	5.30262	3.91351	5.87459	3.60554	5.30066	4.66072	4.44568	4.13502	5.66963	5.87145	5.1871	5.3254	3.84306	4.84488
ENSG00000058063	ATP11B	ATPase, class VI, type 11B [Source:HGNC Symbol;Acc:13553]	3	protein_coding	6.59516	6.9523	6.13352	7.15462	5.54837	5.93424	6.15045	6.31832	6.23645	4.69121	6.61256	6.20916	5.94285	6.02702	6.07954	5.89441	5.85793	5.90837	6.15199	6.25469	2.71378	6.13603	6.74299	5.70099	6.92509	6.24169	6.78702	6.16365	6.46863	6.32	5.62299	6.15441	6.18581	6.23002	6.99261	6.78072	7.41599	6.37882	6.84189	6.85338
ENSG00000058085	LAMC2	laminin, gamma 2 [Source:HGNC Symbol;Acc:6493]	1	protein_coding	0.402983	6.22197	5.94355	1.75691	7.11539	2.82954	3.70209	7.37877	7.56414	8.85537	2.81996	8.4421	4.79314	7.0745	7.34011	7.00089	7.00442	6.91951	7.77713	7.23622	4.26094	6.08027	5.59685	4.89809	7.88363	5.82103	6.27437	6.52635	9.10572	4.81788	6.03196	2.60326	6.98719	6.49905	6.53561	6.97843	5.70591	4.5036	6.41371	3.46348
ENSG00000058091	CDK14	cyclin-dependent kinase 14 [Source:HGNC Symbol;Acc:8883]	7	protein_coding	5.52005	6.6545	5.3144	5.14991	7.67123	6.36375	6.17657	5.54636	5.36438	6.38069	6.07491	6.45611	5.17273	5.61592	5.70591	5.67035	5.78418	5.40374	5.65577	5.46206	5.54803	6.28363	6.1063	5.54427	4.6591	5.76718	6.59409	6.25061	7.22896	5.06305	5.85102	5.38935	5.57179	5.74073	4.00613	5.53617	7.05459	5.08186	6.33345	7.41394
ENSG00000058262	SEC61A1	Sec61 alpha 1 subunit (S. cerevisiae) [Source:HGNC Symbol;Acc:18276]	3	protein_coding	9.9731	9.64081	9.21323	9.15073	8.40117	8.86766	8.69424	9.24018	8.96582	8.55714	8.29125	8.67274	7.6667	8.57351	8.23233	8.25503	8.73088	8.33403	8.46006	8.16914	8.66565	8.47828	8.37838	8.76855	9.07654	8.52501	9.26214	8.45404	9.19207	9.18683	7.46046	8.26784	8.3018	8.81126	9.06695	8.55065	9.67736	9.18683	9.45275	9.94378
ENSG00000058272	PPP1R12A	protein phosphatase 1, regulatory subunit 12A [Source:HGNC Symbol;Acc:7618]	12	protein_coding	5.91017	6.04725	5.82414	5.33868	6.13721	5.95371	5.89654	5.91972	5.83777	5.76908	5.9548	5.25761	5.97228	6.60532	6.67269	6.42937	6.3683	6.33514	6.59249	6.30911	6.20604	6.43213	6.12683	6.52344	6.2731	6.39364	5.69227	6.50922	5.98344	5.7888	6.29887	6.31447	6.73209	6.3364	5.96864	5.61759	5.90192	6.1524	6.62257	5.95559
ENSG00000058335	RASGRF1	Ras protein-specific guanine nucleotide-releasing factor 1 [Source:HGNC Symbol;Acc:9875]	15	protein_coding	2.93396	5.40503	2.57832	0.6462	1.73909	4.56128	4.68607	-0.190424	3.03308	3.43142	-1.00507	-0.579246	-0.768432	1.23111	-0.26313	-1.33999	-0.408006	-0.17392	0.803235	-2.00421	1.15004	4.34394	4.96725	-0.0908834	-0.447737	3.75194	0.942163	-0.0125153	2.05875	3.3096	0.644465	-0.187717	2.57771	0.0854425	-0.458116	0.102003	-1.50867	-0.461371	1.91108	-0.749405
ENSG00000058404	CAMK2B	calcium/calmodulin-dependent protein kinase II beta [Source:HGNC Symbol;Acc:1461]	7	protein_coding	0.672213	-1.49657	-0.349654	-0.408006	-1.32423	1.04749	0.735604	-1.42199	-0.599652	-0.444698	-2.98207	0.513514	0.230965	1.86512	0.369061	1.95329	3.81555	0.335901	0.558752	1.81654	0.358433	0.470416	1.38954	-0.438711	-0.72573	1.21663	-1.1708	-2.62393	3.03584	1.80817	-2.11428	0.173024	-1.96029	-1.73221	2.24136	1.61355	-2.21548	-0.464726	-1.24632	0.709325
ENSG00000058453	CROCC	ciliary rootlet coiled-coil, rootletin [Source:HGNC Symbol;Acc:21299]	1	protein_coding	4.57275	4.65233	3.77671	5.25919	5.00257	3.26113	4.63949	3.55223	4.44335	4.55025	4.34289	4.81162	4.23695	4.84011	4.66007	4.54277	4.83546	4.81195	4.58501	4.53691	5.41668	4.84075	5.15831	4.71263	4.16142	4.358	4.03	4.95498	4.91664	4.04317	5.86972	4.78954	4.86155	5.15512	4.70815	3.49963	5.43146	5.86258	4.27579	5.03552
ENSG00000058600	POLR3E	polymerase (RNA) III (DNA directed) polypeptide E (80kD) [Source:HGNC Symbol;Acc:30347]	16	protein_coding	5.80389	5.5453	5.55011	5.30677	5.23776	5.25362	5.16109	5.31962	5.23373	4.98048	4.57686	4.66681	4.92453	5.48078	5.6156	5.22477	5.76943	5.20221	5.31863	5.50032	5.63509	5.03936	5.27825	5.19504	5.3913	5.21641	5.78991	5.46546	5.82671	5.81757	5.31863	5.22177	5.33397	5.74106	5.26114	6.77462	4.92319	5.09107	4.9643	4.51667
ENSG00000058668	ATP2B4	ATPase, Ca++ transporting, plasma membrane 4 [Source:HGNC Symbol;Acc:817]	1	protein_coding	4.56296	7.43181	7.16829	7.46046	7.74036	7.00661	6.85147	7.04177	7.6426	7.44057	7.60165	7.36129	8.82314	7.26472	7.14017	7.4546	6.52968	8.04612	7.60745	7.97056	8.70513	6.50439	7.16161	7.01241	5.70951	7.75458	5.90091	7.41701	8.37556	6.32603	7.7341	6.88042	7.81533	7.39572	5.5026	6.97211	7.82212	7.7019	7.33488	7.15816
ENSG00000058673	ZC3H11A	zinc finger CCCH-type containing 11A [Source:HGNC Symbol;Acc:29093]	1	protein_coding	7.77225	7.38189	8.00461	7.99448	7.75937	7.52696	7.5823	7.88908	8.37838	7.66986	7.61012	7.58874	7.50757	7.88908	7.79687	7.97253	7.54919	8.02932	7.70644	7.70492	7.84628	7.24832	7.76418	7.62658	7.3446	7.61825	7.61981	8.01896	7.73566	7.80354	7.19594	7.34105	7.87103	7.72479	6.70926	7.93949	7.65358	8.36156	7.51501	7.06234
ENSG00000058729	RIOK2	RIO kinase 2 [Source:HGNC Symbol;Acc:18999]	5	protein_coding	3.61863	3.79339	3.94147	3.93913	3.78204	3.98197	3.7172	3.74557	3.80231	4.27683	3.20974	3.65971	4.12756	4.06973	3.93495	4.06693	4.24936	4.06477	4.50877	4.28709	4.42794	4.43662	3.14027	4.22014	4.31923	3.76698	4.26399	3.81948	4.25112	4.54373	4.12076	4.47965	4.1872	3.78637	4.32149	4.32246	3.7158	4.03382	4.18269	3.86976
ENSG00000058799	YIPF1	Yip1 domain family, member 1 [Source:HGNC Symbol;Acc:25231]	1	protein_coding	5.0666	4.626	4.46953	3.11889	4.11529	4.78856	5.38802	3.66175	3.986	4.91326	4.02016	4.51172	3.93767	4.23999	4.01862	4.22868	4.91356	4.21404	4.33851	3.96038	4.0478	4.53406	3.52145	4.46034	4.52383	5.49733	4.34219	3.49781	4.43312	4.92799	4.55773	3.73066	4.04957	4.2263	3.9038	3.22279	4.22801	3.37901	4.74699	4.32985
ENSG00000058804	NDC1	NDC1 transmembrane nucleoporin [Source:HGNC Symbol;Acc:25525]	1	protein_coding	6.02146	5.77359	5.75639	5.18549	4.71357	5.71441	5.73218	5.34539	4.73966	4.49117	5.29021	4.91141	3.66789	5.01989	4.23416	4.3731	4.52746	4.43623	4.36006	4.20174	6.41555	5.92765	4.79382	5.16308	5.93705	5.9002	5.52535	4.10504	6.19374	5.15226	6.46273	5.58083	5.05405	4.6591	5.40569	5.18581	5.12189	5.13475	4.79382	4.83576
ENSG00000058866	DGKG	diacylglycerol kinase, gamma 90kDa [Source:HGNC Symbol;Acc:2853]	3	protein_coding	0.476203	2.38077	-0.67628	1.23405	-0.346218	1.13217	-0.515132	-1.05826	-0.0304894	0.0946891	-0.0101143	0.119112	1.66287	-0.505594	0.187052	1.24852	0.458328	1.632	1.82674	1.88632	-0.312066	1.94361	2.24732	-0.753411	1.15649	0.447518	0.966475	0.124268	3.13487	-0.2787	0.766459	0.684193	1.89781	1.19082	0.927667	1.41577	0.759591	1.29877	1.95921	2.03031
ENSG00000059122	FLYWCH1	FLYWCH-type zinc finger 1 [Source:HGNC Symbol;Acc:25404]	16	protein_coding	5.21641	4.43916	5.13475	5.53111	4.97944	4.99766	4.98516	5.47382	4.30765	5.16917	4.74031	4.40171	5.59653	5.81388	6.01885	5.62266	5.23975	5.43848	5.65252	5.37839	5.27623	3.46105	4.34532	5.4361	4.25347	4.78634	4.51933	5.5257	5.50425	5.36407	4.53851	5.05345	5.40122	5.65327	4.35335	5.47414	5.20443	6.00192	5.10026	5.87459
ENSG00000059145	UNKL	unkempt family zinc finger-like [Source:HGNC Symbol;Acc:14184]	16	protein_coding	4.48763	3.75312	4.2677	3.87052	3.80311	3.84425	3.47383	4.55025	4.1532	2.69725	3.78599	3.55223	4.43118	4.78856	4.43818	4.69184	4.66007	4.7518	4.50392	4.14919	4.26198	3.48113	3.73827	3.56305	3.06623	4.15219	3.22173	4.32951	4.28029	4.18512	3.25143	3.74108	3.65929	3.79746	3.81134	3.96701	4.27755	3.35871	4.09964	3.97278
ENSG00000059377	TBXAS1	thromboxane A synthase 1 (platelet) [Source:HGNC Symbol;Acc:11609]	7	protein_coding	3.21422	3.08622	2.75506	2.45778	3.48514	4.5681	4.75432	3.83637	4.37144	3.51973	4.81538	3.35422	3.44297	1.95061	3.53998	2.64861	2.99785	3.47934	3.8862	3.31194	3.24581	3.29689	2.75692	3.90659	3.60108	4.22505	3.85527	3.68322	2.66503	4.45801	3.19908	3.4587	3.90659	3.3163	2.67407	2.00301	3.54131	2.24136	5.55636	3.74108
ENSG00000059378	PARP12	poly (ADP-ribose) polymerase family, member 12 [Source:HGNC Symbol;Acc:21919]	7	protein_coding	4.54631	5.68538	5.34729	4.8385	6.65231	6.41285	5.41417	4.47486	6.71321	6.72567	6.00116	6.46863	4.53851	4.71549	4.74768	5.14289	4.3507	5.90555	5.47281	4.85011	5.68676	6.60483	3.99183	5.85289	6.33936	5.14322	5.03306	5.39162	5.9112	5.07035	6.73005	4.45872	5.54222	6.66824	5.35346	4.49285	4.58023	4.50128	6.94293	4.80292
ENSG00000059573	ALDH18A1	aldehyde dehydrogenase 18 family, member A1 [Source:HGNC Symbol;Acc:9722]	10	protein_coding	6.82225	7.5759	6.80154	6.73956	6.99335	6.50671	6.45245	6.60483	7.24276	8.32859	6.50922	6.83676	5.63937	6.38671	6.10469	6.31311	6.64476	5.96524	6.04497	5.90555	6.45429	6.69467	6.93862	6.61207	7.22081	6.27739	7.09196	6.3256	6.29099	7.82042	6.66989	7.3839	6.58248	8.07615	6.89031	6.29056	8.11828	6.31311	6.72457	7.38923
ENSG00000059588	TARBP1	TAR (HIV-1) RNA binding protein 1 [Source:HGNC Symbol;Acc:11568]	1	protein_coding	5.0459	6.16365	6.21239	5.74273	5.63124	5.49733	5.44272	6.34412	6.35609	6.05789	6.45383	6.42441	4.64689	5.77491	5.56017	5.37284	5.25635	5.80712	4.93912	5.20347	6.50346	5.54636	6.53014	5.30741	4.90415	5.70099	5.67609	5.79966	6.63517	6.21074	6.23041	4.83726	6.19332	6.03089	4.93015	5.99782	6.26356	7.04108	5.50126	5.64144
ENSG00000059691	PET112	PET112 homolog (yeast) [Source:HGNC Symbol;Acc:8849]	4	protein_coding	3.00656	2.29472	2.88888	3.61191	3.15655	4.03267	2.90149	2.91474	3.07102	3.09791	2.81279	3.32965	4.20341	3.22173	3.0989	3.3124	3.23544	2.93686	2.72263	2.92287	4.16676	3.01091	3.74596	4.48987	3.40874	4.02856	2.83528	3.00287	2.70306	3.01467	3.17367	3.86743	2.80852	4.10577	3.72906	3.67476	3.30374	3.37995	3.12416	3.61411
ENSG00000059728	MXD1	MAX dimerization protein 1 [Source:HGNC Symbol;Acc:6761]	2	protein_coding	4.85759	5.014	4.1269	3.82437	5.24392	4.64175	4.79979	4.08009	5.3923	4.9874	4.68793	4.62086	4.00613	4.019	4.54187	4.68669	4.85727	5.0409	4.50552	4.66553	4.37048	5.42396	4.21904	4.36145	4.46397	3.62569	4.91326	4.13123	4.67228	4.44536	4.28511	3.48113	4.21536	5.03492	5.41384	4.98109	4.78277	4.76305	6.46415	5.27486
ENSG00000059758	CDK17	cyclin-dependent kinase 17 [Source:HGNC Symbol;Acc:8750]	12	protein_coding	4.63738	4.36984	4.57956	4.60761	4.65556	5.23668	4.9889	4.59475	4.89611	4.93591	4.72656	4.21609	5.39341	5.18422	5.19166	5.3244	5.14477	5.46611	5.08652	5.56436	4.58278	4.83282	4.54156	5.25269	4.51403	4.91693	4.5529	5.35702	4.5681	4.71618	3.92466	4.3412	5.47712	5.67995	4.38386	3.93286	4.62895	4.85169	5.81795	4.6089
ENSG00000059769	DNAJC25	DnaJ (Hsp40) homolog, subfamily C , member 25 [Source:HGNC Symbol;Acc:34187]	9	protein_coding	3.30325	3.54313	3.38731	3.5358	3.41931	2.97701	3.26875	1.97151	2.59596	4.16033	2.50196	2.59401	4.39122	3.22779	2.49168	3.33851	3.47557	2.70996	3.53338	3.64437	4.05953	3.39311	3.43142	3.59785	3.3696	3.63816	3.96301	3.25403	1.99786	3.07831	3.11058	3.45914	2.84465	3.50812	4.36113	3.74963	2.90394	3.89494	3.72825	5.13126
ENSG00000059804	SLC2A3	solute carrier family 2 (facilitated glucose transporter), member 3 [Source:HGNC Symbol;Acc:11007]	12	protein_coding	4.39155	6.82538	5.47351	5.31026	6.6743	5.39261	5.96759	5.65611	5.89157	5.69298	5.39789	4.3238	7.30649	4.55645	6.71606	7.43841	5.28925	8.64113	6.60385	7.38189	3.63729	6.96542	6.3997	6.98719	5.77285	6.35378	5.06629	7.11457	6.14952	5.49493	4.95236	5.5972	6.72623	6.72733	8.05889	5.37611	4.89975	5.21608	6.78185	6.53216
ENSG00000059915	PSD	pleckstrin and Sec7 domain containing [Source:HGNC Symbol;Acc:9507]	10	protein_coding	0.836407	0.0465807	-0.156555	3.85366	2.05183	0.433893	0.490168	1.91608	0.0658962	1.65284	-0.26313	0.598654	-0.305498	-0.039068	0.766459	0.997883	1.61026	-0.737393	0.666528	0.593061	-0.813885	-0.32394	0.144279	0.796725	-0.352689	1.37313	0.818011	1.10882	-0.528269	1.99266	0.935481	0.0490626	0.526851	1.68714	1.02883	0.450123	1.98683	0.343065	-0.361586	1.43288
ENSG00000060069	CTDP1	CTD (carboxy-terminal domain, RNA polymerase II, polypeptide A) phosphatase, subunit 1 [Source:HGNC Symbol;Acc:2498]	18	protein_coding	4.93278	4.58958	4.80942	5.34729	4.4679	4.80486	5.07213	4.88797	4.59762	4.63507	4.69986	4.57275	4.66197	4.73079	4.41979	4.43053	4.63377	4.37816	4.63377	4.58216	5.56809	5.91532	4.20829	4.70363	5.12063	4.93532	5.02049	4.75023	4.99543	4.55998	5.88292	5.26148	4.93404	4.62927	6.53915	5.94675	4.89878	4.45668	5.14417	5.69092
ENSG00000060138	YBX3	Y box binding protein 3 [Source:HGNC Symbol;Acc:2428]	12	protein_coding	5.56542	9.1624	8.55714	5.79828	8.47828	6.61627	6.69685	8.3983	7.59486	7.8069	7.39472	7.84802	8.3178	8.19787	8.40694	8.3812	7.95685	8.54097	7.95103	8.56366	7.87821	8.31512	8.42733	7.86567	6.1818	7.40848	7.40431	7.60165	8.53137	7.90191	7.92241	7.70795	8.01896	7.37462	7.33691	7.25145	5.55147	8.3983	7.28013	7.92053
ENSG00000060140	STYK1	serine/threonine/tyrosine kinase 1 [Source:HGNC Symbol;Acc:18889]	12	protein_coding	2.16607	4.22904	2.99592	-1.03207	2.23762	3.04335	0.521161	1.49363	3.59968	3.20871	0.238298	-1.25113	-0.547961	2.77971	0.874097	1.1486	2.44522	1.34812	1.89154	0.844362	1.40471	2.54619	1.63711	2.68423	-0.508743	0.911482	1.26387	1.07321	2.65238	3.45826	2.79353	-1.21555	0.94359	0.0389864	4.02664	1.13773	-0.986364	0.545182	2.50931	2.19019
ENSG00000060237	WNK1	WNK lysine deficient protein kinase 1 [Source:HGNC Symbol;Acc:14540]	12	protein_coding	8.96139	9.32595	9.22933	7.49298	9.53229	8.23985	7.87641	8.87592	8.74582	8.47218	9.61727	7.62658	8.47522	8.43617	7.68342	8.02516	7.98845	8.27042	7.69739	8.34771	8.03559	8.92655	9.86905	8.78779	8.18102	8.14805	7.81363	8.61027	9.43362	8.71978	8.9526	8.30445	8.52184	9.3015	9.86905	8.46308	8.05675	8.45705	8.33131	7.86924
ENSG00000060339	CCAR1	cell division cycle and apoptosis regulator 1 [Source:HGNC Symbol;Acc:24236]	10	protein_coding	4.9753	4.56326	5.22988	5.67243	5.25207	5.66055	5.14387	5.42185	5.3023	5.2514	4.94722	5.19229	4.70946	5.06845	5.25108	4.82893	5.147	5.06168	4.77678	5.16208	6.15801	5.9734	5.78093	5.6512	5.7445	5.17273	6.13558	6.03666	6.03159	6.14197	5.76494	5.90262	5.86188	5.88083	5.819	7.64797	5.34573	6.10237	5.73291	5.47246
ENSG00000060491	OGFR	opioid growth factor receptor [Source:HGNC Symbol;Acc:15768]	20	protein_coding	5.02887	4.56096	5.1403	5.51163	5.54055	6.33895	5.2458	4.94541	5.97606	4.84456	5.52005	4.9643	5.515	5.31895	5.58471	5.72535	5.38492	5.76392	5.60016	5.5308	5.99383	6.661	6.01348	6.06491	6.13513	5.63707	5.37024	5.7445	5.26418	4.51766	5.43943	5.09936	5.61305	5.86936	4.59729	6.08378	4.82391	5.58746	6.2328	5.21221
ENSG00000060558	GNA15	guanine nucleotide binding protein (G protein), alpha 15 (Gq class) [Source:HGNC Symbol;Acc:4383]	19	protein_coding	1.92477	5.55011	4.12297	2.35316	3.37154	4.62731	3.4138	3.20624	4.13425	2.49704	5.16597	4.56683	2.19487	3.17119	3.56078	3.02604	2.95381	3.50667	3.39262	2.97701	2.73183	4.11529	3.01805	3.40212	3.33115	4.24167	3.71888	3.47128	4.22194	2.44788	4.12896	3.05001	3.76323	2.4618	3.50196	2.61124	3.3326	2.67896	4.99023	4.41865
ENSG00000060642	PIGV	phosphatidylinositol glycan anchor biosynthesis, class V [Source:HGNC Symbol;Acc:26031]	1	protein_coding	4.52222	3.37578	3.23438	2.58662	3.43792	4.11315	4.55645	3.75965	2.95766	3.87951	3.59968	3.4161	4.16676	4.01028	4.14299	4.04212	4.8462	4.24793	3.97887	4.37081	4.0129	3.17119	4.11315	4.48073	3.44848	4.62731	3.32272	3.9201	3.42943	3.60782	4.354	3.51455	3.68279	3.62313	4.14851	3.02979	4.22663	3.43558	2.86534	2.66194
ENSG00000060656	PTPRU	protein tyrosine phosphatase, receptor type, U [Source:HGNC Symbol;Acc:9683]	1	protein_coding	4.20275	5.85102	5.24292	4.21944	5.74687	4.75629	5.11286	5.09936	5.98016	5.78744	6.37663	6.79054	4.82456	5.43019	5.49669	5.30994	5.23471	4.51538	4.97339	4.94754	4.16757	5.89476	7.17246	4.45801	4.02856	7.21912	5.61375	4.85011	3.36819	4.89055	5.72535	5.5181	4.37508	3.82261	6.52142	4.35871	3.79584	6.80224	3.24775	4.50585
ENSG00000060688	SNRNP40	small nuclear ribonucleoprotein 40kDa (U5) [Source:HGNC Symbol;Acc:30857]	1	protein_coding	5.34367	5.49557	4.59085	5.41922	4.8713	4.92519	4.98109	4.69025	4.96559	4.37179	5.10837	5.17046	4.57172	4.69784	4.71202	4.35169	4.59729	4.59633	4.74416	4.58858	5.69881	6.00303	5.07939	5.20061	5.03783	4.57786	4.81227	4.61375	5.74754	5.24325	5.55879	5.3913	4.97021	4.82606	5.38834	4.64528	5.06875	5.44505	4.78187	4.58728
ENSG00000060709	RIMBP2	RIMS binding protein 2 [Source:HGNC Symbol;Acc:30339]	12	protein_coding	-0.680082	-2.58747	-2.5992	-0.292742	-0.391365	-0.471248	-0.447737	-1.22094	-2.8221	1.46752	-2.04123	-1.42199	-0.788226	-0.880802	-1.77541	-1.00082	-0.374376	-1.74031	0.203239	-1.48479	-2.00421	-1.57268	-1.09207	-1.65117	-1.0693	-2.00421	-1.86361	-1.94408	0.18012	-2.31647	-1.50206	-0.414041	-0.829881	-2.18871	6.73956	-1.33487	-1.19502	2.86709	0.00873368	-4.09933
ENSG00000060718	COL11A1	collagen, type XI, alpha 1 [Source:HGNC Symbol;Acc:2186]	1	protein_coding	6.56313	7.91086	7.82725	6.44741	10.8337	7.18991	10.1323	8.39257	6.33473	10.3458	8.54741	6.9257	2.97066	2.53184	2.05533	1.79454	1.74225	-1.26548	0.201031	2.00722	5.90333	5.99782	8.81126	6.4207	9.28449	10.4631	9.19733	8.356	5.52809	6.34329	7.82896	9.70069	1.1686	7.04247	3.9124	7.75458	10.2785	5.7618	6.94749	3.32222
ENSG00000060749	QSER1	glutamine and serine rich 1 [Source:HGNC Symbol;Acc:26154]	11	protein_coding	5.96487	6.84253	7.22709	7.15736	5.99526	6.37135	6.7859	6.9066	6.8407	5.99672	6.81393	6.57447	5.60538	6.70864	6.55479	6.52589	6.24047	6.00532	6.10704	6.15921	6.81146	7.52947	7.90932	6.22797	6.96542	6.35425	6.40915	6.13001	6.53654	6.79535	7.15286	6.80404	6.40423	6.6007	6.55378	7.04692	7.08315	6.89031	6.36017	6.82796
ENSG00000060762	MPC1	mitochondrial pyruvate carrier 1 [Source:HGNC Symbol;Acc:21606]	6	protein_coding	3.63076	3.98079	4.66904	2.41337	4.28065	3.98044	3.65372	4.94167	3.54545	4.85791	3.95055	4.3731	4.68472	4.09809	3.7337	3.41564	3.77344	3.48156	4.25791	3.9974	4.61473	3.51973	4.19314	3.70061	3.50856	3.49474	4.68607	3.58997	4.09498	4.83636	4.70394	5.60884	4.12896	4.01862	3.49196	4.53914	3.81516	3.92502	4.79944	4.13344
ENSG00000060971	ACAA1	acetyl-CoA acyltransferase 1 [Source:HGNC Symbol;Acc:82]	3	protein_coding	6.08717	5.38396	5.12387	5.56937	5.09907	5.75033	5.24774	5.8709	4.97184	6.0127	5.87565	6.81976	6.04377	5.53184	5.33297	5.40631	5.8046	5.37157	5.73688	5.27653	4.16221	4.66744	5.71304	5.97904	5.20964	6.19816	4.75279	5.15986	4.69341	5.96224	4.70847	5.49396	5.31929	6.10704	4.59538	5.10195	6.57714	4.34831	5.58014	4.35237
ENSG00000060982	BCAT1	branched chain amino-acid transaminase 1, cytosolic [Source:HGNC Symbol;Acc:976]	12	protein_coding	4.70428	7.25807	4.61666	6.20954	6.24209	5.32898	6.60483	4.58533	4.84361	5.34821	5.45833	4.19753	4.32117	1.52853	1.67766	2.99378	1.81927	3.77715	3.15605	2.55971	5.66928	5.30933	3.94847	3.73148	4.78698	5.9787	6.17414	4.1269	6.96471	3.83389	4.38421	4.8182	2.67092	3.94847	3.75477	4.02206	4.75728	4.25791	5.43848	6.49609
ENSG00000061273	HDAC7	histone deacetylase 7 [Source:HGNC Symbol;Acc:14067]	12	protein_coding	6.31532	5.40185	5.86401	5.47414	6.82342	5.42252	6.46465	6.52729	6.57447	6.23484	6.01926	5.69092	6.72117	6.23041	6.70188	6.7098	6.50671	6.92895	6.7899	6.81026	5.62232	5.06875	5.26952	6.3256	5.39341	6.36287	5.91203	6.71777	5.34821	5.89911	5.52636	5.43177	6.64882	6.97211	5.20411	5.73622	5.71651	6.04725	6.48742	6.15516
ENSG00000061337	LZTS1	leucine zipper, putative tumor suppressor 1 [Source:HGNC Symbol;Acc:13861]	8	protein_coding	3.82187	3.64051	4.58216	6.63176	4.75055	3.54043	4.34532	4.92355	3.2661	4.51766	3.68235	3.13329	3.77023	5.58505	5.12905	5.43975	3.80194	4.40607	4.63283	3.71152	3.35961	3.44527	4.64175	3.55617	3.69672	5.064	4.58924	4.34359	4.55549	3.3781	3.84619	3.5109	3.82109	4.12006	4.74832	4.42042	4.13229	6.29144	3.15184	3.15554
ENSG00000061455	PRDM6	PR domain containing 6 [Source:HGNC Symbol;Acc:9350]	5	protein_coding	1.19217	1.46528	0.908421	1.99706	2.38948	0.0946891	2.04319	2.19867	-0.27294	3.17119	1.59104	1.78119	2.15987	-0.635401	0.168485	0.822843	0.751064	0.431727	2.20009	2.20867	1.08646	1.05744	1.09638	1.75584	0.945076	2.98427	1.92132	1.40361	0.568145	2.41479	1.20318	1.66586	0.421919	1.76799	0.0217185	1.46164	1.96091	2.86302	1.13647	2.23306
ENSG00000061656	SPAG4	sperm associated antigen 4 [Source:HGNC Symbol;Acc:11214]	20	protein_coding	4.97817	1.90764	1.91108	0.812923	1.44492	4.63283	2.6911	0.0782835	3.72054	1.02328	2.86878	1.90401	2.24285	1.79165	0.850825	0.327405	1.632	1.80727	1.93059	1.81272	1.18035	2.78281	1.84712	2.18611	2.64471	3.03584	1.90679	2.47732	0.784881	3.71929	1.93412	1.21359	1.22567	1.15263	3.79036	1.27261	3.55223	1.9032	5.25362	4.13461
ENSG00000061676	NCKAP1	NCK-associated protein 1 [Source:HGNC Symbol;Acc:7666]	2	protein_coding	7.25319	8.69941	7.59611	8.11377	7.22996	7.37022	7.56284	7.30251	7.94524	7.61825	6.97776	7.85681	7.35496	7.51501	7.31142	7.09046	7.44552	6.99861	7.29944	7.16161	7.50868	7.74193	7.12776	7.19594	7.1563	7.84802	7.85153	7.00158	7.19514	6.88685	7.60745	7.43391	7.16064	7.31347	7.41394	7.44665	7.31971	6.96202	6.43303	8.37838
ENSG00000061794	MRPS35	mitochondrial ribosomal protein S35 [Source:HGNC Symbol;Acc:16635]	12	protein_coding	4.86084	6.01544	6.06791	4.59148	5.57947	5.28988	5.07939	5.55443	5.56872	5.66096	4.94633	4.69566	4.62245	5.59095	4.59795	4.78856	5.03936	4.38859	4.92953	4.55742	5.46803	6.59249	4.98647	5.11708	5.46611	4.83094	4.4516	4.84199	6.41187	6.13389	5.5308	4.71905	4.95144	4.22051	5.01431	5.69059	7.00878	4.2962	4.76561	4.92643
ENSG00000061918	GUCY1B3	guanylate cyclase 1, soluble, beta 3 [Source:HGNC Symbol;Acc:4687]	4	protein_coding	3.51455	3.16588	3.35274	4.57338	5.52671	3.4476	3.60467	4.61699	3.23594	4.68925	4.20829	2.72326	4.36343	2.62023	3.42267	3.64521	2.46704	4.25347	3.43792	3.61232	3.61545	5.23116	4.65332	4.78922	4.78826	3.9578	4.88385	4.06693	2.97521	3.76088	3.4476	3.29533	3.58154	4.5068	3.40918	3.47789	4.47934	3.65669	4.1327	2.49233
ENSG00000061936	SFSWAP	splicing factor, suppressor of white-apricot homolog (Drosophila) [Source:HGNC Symbol;Acc:10790]	12	protein_coding	4.96209	4.30899	4.65845	5.11837	5.19921	4.94509	5.28343	5.31895	5.37157	4.89215	5.14574	4.51798	5.41892	5.30453	5.67276	5.43238	5.35413	5.59444	5.43808	5.69411	5.80634	4.63796	5.02219	5.43848	5.12481	5.78093	5.23975	5.29021	5.55044	4.82997	5.56673	5.00883	5.74962	5.83359	4.99176	5.91608	4.95266	5.75357	5.31156	5.07669
ENSG00000061938	TNK2	tyrosine kinase, non-receptor, 2 [Source:HGNC Symbol;Acc:19297]	3	protein_coding	5.49362	6.17021	5.61198	6.26356	6.13078	5.39926	4.77171	6.35165	6.16244	5.02327	6.06036	5.64749	5.36471	5.87774	6.19133	6.03442	6.1942	6.13039	5.683	5.76943	4.9679	4.92453	7.1865	5.09421	5.06691	5.36505	5.58471	6.45109	5.92475	5.81531	5.86082	5.08002	6.2692	6.3231	5.74998	5.58311	7.07282	6.62552	6.42492	5.94821
ENSG00000061987	MON2	MON2 homolog (S. cerevisiae) [Source:HGNC Symbol;Acc:29177]	12	protein_coding	6.72344	5.50564	5.81968	6.65337	5.94894	6.02656	6.39827	6.03235	5.82243	6.47626	6.15721	5.70517	6.26833	6.35425	6.71085	6.52729	6.49261	6.8731	6.55736	6.56423	5.65509	5.79318	5.78132	6.77462	5.54837	6.17299	5.54389	6.51558	5.42217	6.27396	5.69773	6.07174	6.58831	6.94502	5.60949	5.74483	6.09323	6.23159	6.6545	6.34151
ENSG00000062038	CDH3	cadherin 3, type 1, P-cadherin (placental) [Source:HGNC Symbol;Acc:1762]	16	protein_coding	1.76895	7.67123	7.01241	1.632	7.32358	6.03702	4.58119	6.27991	7.62265	7.00965	4.12933	7.68632	3.4649	6.93928	7.0745	6.31872	5.66797	5.25431	5.83995	5.41957	6.34913	7.62795	6.96202	7.05767	7.11786	6.32737	5.80178	5.76359	6.30352	5.50637	6.0537	3.5299	6.97421	7.78039	5.46739	7.27714	6.93795	6.09205	6.50243	4.93649
ENSG00000062194	GPBP1	GC-rich promoter binding protein 1 [Source:HGNC Symbol;Acc:29520]	5	protein_coding	5.48877	5.61093	5.91238	6.37751	5.96723	5.83315	5.71992	6.00608	6.07677	6.0401	5.75599	6.01686	5.89299	6.38265	6.40056	6.44971	6.35882	6.43852	6.39467	6.33092	6.12094	5.97566	5.78638	6.09092	6.01	5.26551	5.31282	6.28275	6.01926	5.56709	5.79899	6.47929	6.22365	5.97724	5.74311	5.67577	5.66829	6.13926	6.1005	5.33742
ENSG00000062282	DGAT2	diacylglycerol O-acyltransferase 2 [Source:HGNC Symbol;Acc:16940]	11	protein_coding	5.35413	5.92808	5.54837	4.67612	3.52059	6.12055	5.16663	5.3417	4.98327	5.26823	5.80566	4.41245	9.47871	5.2851	2.86766	3.92949	3.79785	5.75816	3.65199	6.72733	5.6536	3.84987	4.5558	4.26703	6.43662	2.94491	5.53926	4.75759	5.19075	5.42124	5.80211	4.85294	4.24936	2.75623	2.49999	5.058	4.15253	3.60281	4.269	4.11315
ENSG00000062370	ZNF112	zinc finger protein 112 [Source:HGNC Symbol;Acc:12892]	19	protein_coding	3.28494	3.70578	2.21487	3.74439	2.55263	1.97327	2.22785	2.55263	2.39554	2.23005	2.30637	2.86939	2.91793	3.53253	3.49062	3.19425	3.1216	3.28304	3.02604	2.82692	2.36228	3.25198	3.42509	2.94153	3.45138	2.43848	2.66194	2.75866	3.70739	2.74892	2.40983	3.54988	2.41907	3.12416	3.33455	2.15018	1.88011	3.93138	2.75623	3.15184
ENSG00000062485	CS	citrate synthase [Source:HGNC Symbol;Acc:2422]	12	protein_coding	7.41911	6.87831	6.60797	7.20098	6.97211	7.05156	7.43391	6.93795	6.52537	7.54051	7.11134	6.81393	7.94524	6.52251	6.89557	6.72677	6.96542	6.80525	6.72238	7.06794	7.209	7.1344	6.69021	7.34352	6.87038	7.00524	6.88685	6.84835	7.06568	7.78531	7.70492	7.90007	7.11711	7.45348	6.65283	6.98382	7.69217	6.70864	6.88685	7.14866
ENSG00000062524	LTK	leukocyte receptor tyrosine kinase [Source:HGNC Symbol;Acc:6721]	15	protein_coding	-0.32394	-1.96951	-0.569099	1.23682	3.55905	1.08343	-0.0125153	1.35645	1.43403	-1.52668	2.77621	2.12504	1.31429	0.356334	0.272579	-1.20058	-1.63779	1.38159	-1.19502	0.598654	-1.59269	2.17718	1.93143	-1.56633	-1.22094	-0.714648	-1.07787	0.215668	-0.430949	-0.00763773	4.1423	0.399009	0.833085	-0.326919	3.57629	-1.04096	0.305746	-0.921063	0.537315	-1.00981
ENSG00000062582	MRPS24	mitochondrial ribosomal protein S24 [Source:HGNC Symbol;Acc:14510]	7	protein_coding	5.04456	6.93795	6.66384	5.83709	5.97262	5.83067	5.94217	5.86936	5.6316	6.40056	6.00419	6.59516	5.7113	6.10013	5.39033	5.35346	5.45967	4.96987	5.49526	5.44572	7.19594	7.00158	6.69741	5.85428	6.02	6.201	6.57088	5.30584	6.74768	5.77402	7.04177	6.25632	5.68506	4.79087	6.06036	5.66657	6.20223	4.446	6.06906	6.96882
ENSG00000062598	ELMO2	engulfment and cell motility 2 [Source:HGNC Symbol;Acc:17233]	20	protein_coding	4.1972	4.17247	5.23054	5.12937	6.05717	5.56904	5.47246	5.37969	5.27203	5.93636	5.0481	4.80103	5.01431	5.08812	4.90692	5.19504	5.4637	5.28544	4.83251	5.11348	4.74636	4.20373	4.29691	5.77171	5.43238	5.37381	5.03276	5.15388	4.73613	5.44208	4.17001	5.24517	5.08589	5.38679	4.4398	4.78217	5.7514	5.52604	5.36727	5.63937
ENSG00000062650	WAPAL	wings apart-like homolog (Drosophila) [Source:HGNC Symbol;Acc:23293]	10	protein_coding	5.40962	5.28883	5.85726	6.35425	5.92726	6.12877	5.71441	5.84207	6.36458	6.22365	6.09129	6.15278	5.88919	6.30272	6.40739	6.27739	6.33345	6.17218	6.33514	6.33726	5.8977	6.0587	6.02111	6.04052	5.78347	5.49702	5.37348	6.17568	6.28363	6.48698	5.89511	6.10819	6.1897	6.16846	5.96938	5.604	5.43771	5.70268	6.14161	5.76217
ENSG00000062716	VMP1	vacuole membrane protein 1 [Source:HGNC Symbol;Acc:29559]	17	protein_coding	7.08002	7.02455	7.54675	8.73833	9.18161	7.57097	8.77237	8.47522	7.29357	7.49426	7.73879	7.6306	7.06568	7.41088	9.13054	7.68189	7.86745	8.55714	7.46624	8.43617	6.09585	7.67269	7.99247	9.1406	6.71836	8.1048	7.83931	8.69064	7.09196	7.99046	7.14619	6.93795	8.52818	9.13054	6.13118	8.87592	8.63421	8.47522	7.98645	8.16442
ENSG00000062725	APPBP2	amyloid beta precursor protein (cytoplasmic tail) binding protein 2 [Source:HGNC Symbol;Acc:622]	17	protein_coding	4.46919	4.52876	5.52338	5.6731	5.17339	4.91788	5.27047	5.33968	5.01849	4.35	4.86664	5.49008	6.083	5.84382	5.73391	5.7257	5.86115	5.51196	5.82671	5.69334	5.11348	6.08832	5.36795	5.28702	6.0476	5.09076	5.64956	5.31091	4.96593	4.83788	5.25761	5.26482	5.24517	4.7165	5.0875	5.35737	6.18853	4.8683	5.01722	5.39893
ENSG00000062822	POLD1	polymerase (DNA directed), delta 1, catalytic subunit [Source:HGNC Symbol;Acc:9175]	19	protein_coding	6.35512	5.75924	5.26952	6.47827	5.52604	5.74516	4.59344	5.55953	5.55147	4.87064	5.3254	6.10276	4.36006	4.67487	4.96363	4.52582	4.30665	4.79055	4.41311	4.43474	5.29054	5.44367	6.06381	5.25855	5.08062	4.57653	4.97114	4.65812	7.00801	4.53539	5.77912	6.18139	4.67705	5.12387	5.82103	5.35413	5.5567	5.98417	6.38158	5.48909
ENSG00000063046	EIF4B	eukaryotic translation initiation factor 4B [Source:HGNC Symbol;Acc:3285]	12	protein_coding	8.28079	8.54254	8.93085	8.66212	8.13881	8.45105	9.07654	9.0862	8.25758	8.90522	8.75335	8.61706	9.20261	9.73251	9.7652	9.84221	10.0341	9.47217	9.63946	9.55997	10.0134	8.69786	8.31512	9.13556	8.09149	8.50611	8.61366	9.49854	9.16094	8.68704	9.3015	9.58115	9.59547	8.86355	8.59009	7.91678	8.58675	8.89678	8.6586	9.06219
ENSG00000063127	SLC6A16	solute carrier family 6, member 16 [Source:HGNC Symbol;Acc:13622]	19	protein_coding	-2.30649	-3.37633	-1.83976	-0.0360167	0.752755	0.371032	-0.0253596	2.77381	-0.951152	-1.54675	0.978188	-2.50281	1.74225	-0.780004	-0.199483	-0.817866	0.173024	-1.12769	-0.364664	0.7077	-0.628265	1.28675	1.34693	-0.937447	-1.33999	-1.14382	0.79032	-0.0990215	-0.85389	-0.220045	-1.1708	1.94187	-0.444698	0.0117867	-0.982138	-0.461371	1.65887	0.375541	-0.672523	0.731984
ENSG00000063169	GLTSCR1	glioma tumor suppressor candidate region gene 1 [Source:HGNC Symbol;Acc:4332]	19	protein_coding	4.24383	3.6696	3.00128	4.98516	3.37251	3.73452	3.45647	3.73491	3.95363	4.08152	3.56125	3.40647	3.50447	3.69074	3.89089	3.71537	3.76501	3.90659	3.65286	3.79073	3.65414	4.00138	4.75878	3.59396	4.32315	3.40551	3.49918	4.05883	4.03699	4.09335	3.58862	3.9651	3.77344	4.23044	4.23076	4.77077	4.21503	4.61343	4.37542	4.15638
ENSG00000063176	SPHK2	sphingosine kinase 2 [Source:HGNC Symbol;Acc:18859]	19	protein_coding	4.61763	4.4619	3.287	4.48826	4.25583	4.12896	3.84503	4.353	4.43019	4.19616	3.92835	4.087	4.13903	3.94445	4.38455	4.15138	4.03231	4.0887	4.03416	4.04534	4.03593	3.96223	4.27821	3.9337	4.39329	3.10637	3.61275	4.07268	4.80557	4.1518	4.20587	4.26505	3.62823	3.98524	4.18127	3.7662	4.04603	4.42405	5.12189	4.31656
ENSG00000063177	RPL18	ribosomal protein L18 [Source:HGNC Symbol;Acc:10310]	19	protein_coding	9.00171	10.4489	9.72448	9.87813	9.43362	9.47871	9.15583	10.1909	9.20261	9.85109	9.40856	10.0237	9.37187	10.3049	10.1438	9.9731	10.1909	9.28449	10.0659	9.94378	9.20791	9.553	9.90581	9.91519	9.04799	8.64113	9.13556	9.86003	9.94378	9.73251	9.84221	9.77351	9.9731	9.39009	9.51193	9.98305	9.35987	9.20791	9.88728	9.64694
ENSG00000063180	CA11	carbonic anhydrase XI [Source:HGNC Symbol;Acc:1370]	19	protein_coding	0.796725	3.80157	1.08051	1.28296	2.27362	1.87266	0.600506	2.2537	1.78676	0.999309	1.83525	2.64861	2.29122	3.38195	2.78029	2.50457	2.42639	3.01467	3.74876	2.60861	0.609315	0.102003	0.618677	1.44492	1.17133	1.377	0.402983	1.948	1.39065	0.194366	3.0942	3.20871	1.6598	0.325374	3.34756	2.27502	3.0942	0.991881	4.10504	2.38441
ENSG00000063241	ISOC2	isochorismatase domain containing 2 [Source:HGNC Symbol;Acc:26278]	19	protein_coding	5.72315	5.40829	4.37341	5.30029	4.61245	5.66474	4.23488	4.74253	4.85961	5.62953	4.74957	5.09387	5.25698	3.88218	3.98197	3.77179	4.40277	3.64985	3.74481	4.20829	4.41736	4.10645	2.92341	4.48892	3.83234	4.82487	4.30665	3.82965	4.42921	5.11479	4.63825	5.37872	3.50623	4.21404	3.89736	4.03037	5.86332	4.15958	4.87603	6.02146
ENSG00000063244	U2AF2	U2 small nuclear RNA auxiliary factor 2 [Source:HGNC Symbol;Acc:23156]	19	protein_coding	7.15367	6.19216	6.26397	7.32266	6.36458	6.95931	6.30963	7.0373	6.83111	6.03553	6.43261	6.61156	6.02346	6.40465	6.73321	6.5647	6.81026	6.49751	6.32792	6.48194	6.43662	6.51499	7.17593	6.74938	6.66434	6.50197	6.56718	6.74881	7.30345	6.63463	6.58518	7.18735	6.74013	6.74245	7.06963	6.80651	7.0366	6.88963	6.67216	6.8204
ENSG00000063245	EPN1	epsin 1 [Source:HGNC Symbol;Acc:21604]	19	protein_coding	7.08972	6.54206	5.95297	6.59717	6.23318	6.21538	5.68609	6.21905	6.68021	6.4815	5.876	6.97211	6.40829	5.94675	5.91722	6.02573	6.18463	5.8615	6.11223	5.96189	5.2851	6.11609	7.18278	6.36145	6.5662	6.59666	6.02182	5.9432	6.40696	6.54468	5.32126	6.35247	5.68926	6.32473	6.42115	6.26747	6.93584	6.44126	6.81508	7.14942
ENSG00000063322	MED29	mediator complex subunit 29 [Source:HGNC Symbol;Acc:23074]	19	protein_coding	6.24291	6.24291	5.54354	5.98877	6.03235	5.94181	5.39341	6.19216	6.13926	5.87425	5.6206	5.70099	5.67644	6.27522	6.34735	6.19133	6.2166	5.83315	6.24591	6.08186	4.89388	5.52535	6.37536	5.83604	6.05717	5.11018	5.15388	5.82599	5.46333	6.29016	5.00194	6.11609	5.87929	5.57907	5.79966	5.80599	5.91937	5.67342	5.89264	5.96224
ENSG00000063438	AHRR	aryl-hydrocarbon receptor repressor [Source:HGNC Symbol;Acc:346]	5	protein_coding	1.31315	3.12062	3.17828	1.66181	1.37928	0.270371	0.0440331	-0.45177	0.556965	1.59847	0.895364	0.242712	1.32141	2.39286	-0.528269	0.184843	0.196678	-1.54036	-2.91602	-1.63168	-1.08714	0.735604	0.725008	0.486409	-3.45671	1.14193	4.04388	0.631508	0.335901	2.62924	0.699098	2.64413	-1.40959	1.87723	2.41272	1.6648	1.15004	2.54481	1.30962	3.95592
ENSG00000063587	ZNF275	zinc finger protein 275 [Source:HGNC Symbol;Acc:13069]	X	protein_coding	4.67097	6.18344	6.53767	5.7618	5.16339	4.78154	5.25431	5.36267	5.28475	5.32248	4.98327	4.05844	5.87809	5.88211	5.00953	5.2289	4.88445	5.44997	5.41766	5.53254	4.49316	5.27172	4.69217	4.37542	4.69915	5.19955	5.90519	5.50224	4.29724	4.90289	3.7029	5.07243	5.04525	4.5357	6.11498	5.67407	5.11413	5.74516	6.12055	5.91864
ENSG00000063601	MTMR1	myotubularin related protein 1 [Source:HGNC Symbol;Acc:7449]	X	protein_coding	4.57432	5.56263	5.84531	4.57242	4.28779	5.32741	4.51901	4.49117	4.72096	4.22833	4.95205	5.11379	4.001	5.57357	5.32571	4.95205	4.99297	4.55612	5.04976	4.77425	4.19139	5.91608	4.9814	4.42727	4.30283	3.9708	4.54403	4.88895	5.14541	4.1567	4.65526	5.28637	5.21253	4.53851	5.53217	5.07732	4.21719	4.63346	5.32126	4.31827
ENSG00000063660	GPC1	glypican 1 [Source:HGNC Symbol;Acc:4449]	2	protein_coding	5.60604	3.7567	5.24676	9.21323	6.17451	5.24164	5.40056	6.00153	4.63651	5.59549	6.12877	5.47847	6.03407	5.35249	6.38847	5.43439	6.02747	4.76238	5.35506	5.96524	4.60602	5.61926	5.70728	5.05147	6.11892	6.50578	5.59619	5.58851	5.66442	4.44763	5.02257	6.10589	5.03714	5.43053	5.95559	5.2491	6.27739	8.03769	3.49963	7.46735
ENSG00000063761	ADCK1	aarF domain containing kinase 1 [Source:HGNC Symbol;Acc:19038]	14	protein_coding	2.8139	1.64111	1.35404	1.48584	1.63811	2.94599	2.03211	1.0021	1.78317	2.73183	2.36152	3.08843	2.18458	1.13647	1.58596	1.41061	1.64311	1.47689	1.60483	1.96504	3.24477	0.841366	1.10192	2.28518	2.21642	2.49502	1.93059	0.909903	1.377	2.90328	3.14384	2.50654	1.26387	2.36082	2.59596	2.38441	1.74225	2.01231	2.35316	1.88353
ENSG00000063854	HAGH	hydroxyacylglutathione hydrolase [Source:HGNC Symbol;Acc:4805]	16	protein_coding	4.38139	3.67042	4.24793	3.09939	4.10433	4.1788	4.16502	3.954	4.05082	4.34898	3.97042	3.5445	4.93372	3.89996	3.7678	3.64985	4.51078	3.70822	4.06582	3.58997	4.06693	4.13869	4.17213	3.54945	4.269	4.63442	3.81384	3.71152	3.84657	4.19246	3.64267	4.53881	3.46305	3.69501	5.06201	3.664	4.87221	2.63958	4.35103	3.01034
ENSG00000063978	RNF4	ring finger protein 4 [Source:HGNC Symbol;Acc:10067]	4	protein_coding	6.53767	5.29467	5.22957	4.68958	5.28051	6.45611	5.41447	5.17242	5.53485	6.0476	5.34979	4.75629	4.95355	5.19504	5.00194	5.18878	5.44108	5.07243	5.2736	5.15831	5.54904	4.82171	5.79029	4.58533	4.42437	4.95528	5.03874	5.21887	5.55375	4.83348	5.39893	5.72167	5.50528	4.72823	5.73029	5.19043	4.56356	5.16371	5.48141	5.66055
ENSG00000064012	CASP8	caspase 8, apoptosis-related cysteine peptidase [Source:HGNC Symbol;Acc:1509]	2	protein_coding	4.28709	4.24977	4.1518	4.35169	4.27541	4.93708	5.36161	3.99777	4.61827	4.41833	4.72031	4.5782	3.9201	4.19449	4.20208	4.09457	4.60247	4.79153	4.28133	4.4679	3.83039	4.72984	3.47472	4.71324	4.93078	4.6713	4.58501	4.81601	4.01483	4.40203	4.57369	4.33682	5.35537	5.16728	4.03881	4.42529	4.76206	3.43748	5.67541	3.6191
ENSG00000064042	LIMCH1	LIM and calponin homology domains 1 [Source:HGNC Symbol;Acc:29191]	4	protein_coding	7.47218	6.53216	6.87638	5.95739	6.55842	7.71099	7.07045	6.09092	6.67487	7.96662	5.68372	5.95887	7.34011	7.82042	6.809	6.39927	6.70246	6.35124	6.83052	6.52142	6.35694	5.37088	5.80211	6.09512	6.22413	6.32224	6.98114	5.94425	3.9093	7.04766	5.14634	3.95248	5.76494	6.8584	3.76698	6.40056	6.54055	4.8829	6.20018	6.22413
ENSG00000064102	ASUN	asunder spermatogenesis regulator [Source:HGNC Symbol;Acc:20174]	12	protein_coding	4.27337	5.87425	5.61488	4.23695	5.75424	4.28133	4.12657	4.99766	5.19295	4.37402	4.03664	3.57767	3.93064	4.58247	3.66266	3.70578	3.7452	3.99666	3.50056	3.22682	5.23022	6.16888	4.87221	4.30453	5.01204	4.02127	4.45602	4.31586	6.79785	4.76402	5.56116	4.65587	4.46002	3.77715	4.69884	4.61731	6.23002	4.70975	4.68825	5.32741
ENSG00000064115	TM7SF3	transmembrane 7 superfamily member 3 [Source:HGNC Symbol;Acc:23049]	12	protein_coding	7.61152	6.44921	5.76104	3.96472	6.84773	4.75312	4.99147	5.89654	5.71057	6.08186	5.52944	5.37579	4.77077	5.65288	5.17865	5.05011	5.10396	5.31895	5.1387	4.94232	4.79021	6.08595	5.56263	5.0586	7.06794	5.15862	4.6244	5.23944	8.02724	5.93705	6.14793	4.60081	5.44678	4.96886	5.91903	5.30964	7.42592	4.31473	5.53146	4.88864
ENSG00000064195	DLX3	distal-less homeobox 3 [Source:HGNC Symbol;Acc:2916]	17	protein_coding	-1.63779	2.61059	-0.745432	3.23191	1.93506	3.45781	2.22711	-0.991235	2.21193	-3.16724	4.81412	1.45835	-0.89958	0.0658962	0.788592	1.32501	1.4641	-0.837762	-0.495705	-0.0702453	1.16729	2.50323	5.07866	2.33735	0.682438	3.49062	-1.00082	-1.37905	4.05919	-1.50867	3.26875	4.02588	1.48584	1.02467	5.85251	-0.0205419	1.26877	3.80588	4.88766	0.189468
ENSG00000064199	SPA17	sperm autoantigenic protein 17 [Source:HGNC Symbol;Acc:11210]	11	protein_coding	1.71636	-0.122492	1.21359	1.72149	1.35274	1.8516	1.31193	1.69531	1.70733	2.51359	0.837916	0.824368	1.72049	1.33829	1.62266	1.06324	2.99849	0.515403	1.28675	1.19661	3.32412	-0.651321	0.333911	1.40596	1.10468	2.6336	0.783247	0.917994	3.22429	1.18944	2.30567	3.43142	0.773176	0.919667	3.05435	2.64016	-0.0552777	2.09138	0.126597	1.30002
ENSG00000064201	TSPAN32	tetraspanin 32 [Source:HGNC Symbol;Acc:13410]	11	protein_coding	0.564254	-0.0280087	-3.26867	1.84531	0.0973239	1.44599	1.38038	0.568145	0.780047	-0.916926	1.13773	0.356334	0.655444	-1.46728	0.000848969	-0.302019	0.0561943	2.35316	-0.397283	0.43687	-0.342972	-0.891104	-0.502456	-0.0702453	-0.58586	-1.65117	-1.29262	1.4119	-0.880802	-0.444698	-0.891104	-0.22282	3.05435	-0.208264	1.29493	-0.582528	-0.67628	-0.55845	2.16374	0.495768
ENSG00000064205	WISP2	WNT1 inducible signaling pathway protein 2 [Source:HGNC Symbol;Acc:12770]	20	protein_coding	2.38144	3.67562	3.53713	5.54904	1.95061	2.91196	6.38937	3.93838	3.0841	5.63437	4.99237	3.81516	6.68083	1.04881	1.47342	4.21082	3.70657	5.01692	4.10147	4.44961	0.751064	2.54684	2.91143	6.22318	5.54389	5.34036	2.78629	5.45298	0.208555	2.92829	3.56078	4.21156	1.215	2.80671	-1.11395	3.45693	5.47382	0.0059225	5.36538	0.975338
ENSG00000064218	DMRT3	doublesex and mab-3 related transcription factor 3 [Source:HGNC Symbol;Acc:13909]	9	protein_coding	-0.862526	-0.683566	-1.45059	-0.266083	-1.50867	-0.572741	-1.53454	-2.17046	0.249382	-0.00763773	-1.59982	3.19601	2.39839	-1.0693	0.146626	1.4119	-0.89958	1.22441	-0.877	0.693197	-1.23113	-0.00498035	1.24098	0.319178	0.545182	0.625916	-0.885774	-0.430949	1.15131	-1.35047	1.23946	0.545182	-1.17542	0.217837	1.94537	-1.80887	0.333911	0.984717	-0.195894	0.752755
ENSG00000064225	ST3GAL6	ST3 beta-galactoside alpha-2,3-sialyltransferase 6 [Source:HGNC Symbol;Acc:18080]	3	protein_coding	3.52855	2.18011	2.65357	2.61314	2.13401	2.02278	1.1867	2.03496	3.50576	2.13709	2.42786	1.17133	2.89498	2.49168	2.64991	1.53399	1.25863	2.08657	1.50231	1.71431	3.37062	2.03398	1.78676	1.52954	3.58862	1.56872	1.45731	2.04069	2.79476	1.38494	2.01402	3.02822	1.52218	2.06267	1.12659	2.86478	1.39537	2.30779	2.27013	1.33234
ENSG00000064270	ATP2C2	ATPase, Ca++ transporting, type 2C, member 2 [Source:HGNC Symbol;Acc:29103]	16	protein_coding	0.990476	4.56555	0.0946891	-4.6566	-1.4908	2.78091	4.87283	0.999309	4.19348	5.68861	2.25445	2.02875	1.46528	4.16502	2.24574	2.07458	3.72218	1.5417	3.20172	1.79165	2.49367	3.04229	3.7337	0.978188	-1.73221	3.98308	2.34164	0.747713	1.93317	3.33736	4.74002	1.50771	2.35681	4.59054	4.34083	2.21347	4.68958	1.05744	0.222135	1.60677
ENSG00000064300	NGFR	nerve growth factor receptor [Source:HGNC Symbol;Acc:7809]	17	protein_coding	-0.829881	2.40849	4.05082	6.36954	2.05012	0.497654	1.11155	5.12125	2.04849	0.0658962	3.64601	2.56467	5.24103	5.96009	6.44398	6.05294	5.71167	6.20263	6.23359	6.00804	1.06048	3.97116	5.45422	4.32729	3.64051	1.28175	0.323338	5.48344	7.22996	5.42789	0.0514021	1.73169	5.98125	3.98563	5.12387	3.83389	-0.511978	4.61442	5.60465	0.454092
ENSG00000064309	CDON	cell adhesion associated, oncogene regulated [Source:HGNC Symbol;Acc:17104]	11	protein_coding	4.07008	4.31656	4.01712	4.33717	3.05275	1.53931	3.02301	4.8683	4.0748	3.73322	3.19546	4.32511	5.92765	4.57991	4.22833	5.99239	6.25586	5.71756	4.87191	4.82265	4.64369	4.67487	4.72984	5.00509	4.85547	3.20113	3.5781	4.85866	4.72493	4.1262	4.85897	5.2267	4.11033	2.65299	3.3326	3.76736	5.03215	5.53926	3.79187	6.32176
ENSG00000064313	TAF2	TAF2 RNA polymerase II, TATA box binding protein (TBP)-associated factor, 150kDa [Source:HGNC Symbol;Acc:11536]	8	protein_coding	6.96338	6.31094	5.41922	6.28964	5.48078	6.36744	5.02794	4.57786	6.01615	5.34948	5.53554	6.58677	4.51766	5.09323	4.80486	4.61505	4.89646	4.82487	4.69184	4.78922	5.75103	5.65509	5.58604	5.72062	5.63266	6.36606	5.37548	4.9283	5.32802	5.55602	6.79973	5.14509	5.38128	6.24805	6.25261	6.15441	5.0862	6.07677	5.33837	5.75424
ENSG00000064393	HIPK2	homeodomain interacting protein kinase 2 [Source:HGNC Symbol;Acc:14402]	7	protein_coding	7.21528	7.27144	7.28664	6.75299	5.6536	7.82383	7.54298	7.38189	7.10806	7.41599	7.61981	6.29313	8.20761	7.73566	7.47218	7.3712	8.58011	6.91624	7.29448	7.44284	8.33948	7.01738	7.21613	7.72634	8.29388	7.74193	7.68189	7.23102	7.69066	8.66212	8.34222	7.27824	7.47328	6.793	9.10081	6.08636	7.46046	6.47	7.77876	6.42259
ENSG00000064419	TNPO3	transportin 3 [Source:HGNC Symbol;Acc:17103]	7	protein_coding	4.79787	5.966	6.102	5.71686	5.66344	5.98841	5.7683	5.72464	6.17299	5.77774	5.96258	6.13269	5.32156	5.78093	5.08374	5.33297	5.20738	5.39577	5.25077	5.24711	6.4758	5.44108	5.7472	5.33805	6.00842	6.04208	6.33768	5.68474	5.98088	5.89336	6.75771	5.99074	5.84382	5.683	5.75599	5.79029	5.41093	5.52708	5.43085	6.0139
ENSG00000064489	MEF2BNB-MEF2B	MEF2BNB-MEF2B readthrough [Source:HGNC Symbol;Acc:39979]	19	protein_coding	2.856	2.62213	1.85246	2.46704	1.96754	1.59962	1.61661	1.96334	0.0997573	1.8516	2.40553	0.593061	2.20161	2.38798	1.94717	1.72618	2.26417	1.79074	1.08207	1.97407	2.39424	1.87541	2.63437	1.32141	2.70306	0.795162	1.86333	0.417902	0.990476	0.978188	2.747	2.57236	2.31047	2.0604	2.42039	0.607599	2.78572	1.39176	2.02373	2.62983
ENSG00000064490	RFXANK	regulatory factor X-associated ankyrin-containing protein [Source:HGNC Symbol;Acc:9987]	19	protein_coding	5.819	5.37969	5.72167	5.33499	5.10548	4.79347	5.30902	5.16531	5.63707	5.02219	4.94541	4.93078	4.93912	5.20738	4.87789	4.86117	4.90099	4.76748	4.57524	4.47934	5.33131	5.28475	4.982	4.97114	5.7189	4.61538	5.73522	4.70585	5.54055	4.41701	6.12133	5.77128	5.03581	4.90569	5.38802	5.75527	4.95559	5.26677	4.86317	5.80243
ENSG00000064545	TMEM161A	transmembrane protein 161A [Source:HGNC Symbol;Acc:26020]	19	protein_coding	5.44802	5.58408	5.68136	4.89542	5.00321	4.49925	5.1676	4.79475	4.47455	4.76336	4.89779	5.44175	4.4385	4.92257	3.84083	4.24167	4.51335	4.32149	4.28276	4.28511	5.26614	4.51933	4.41701	4.2921	4.7419	3.99556	5.31679	3.85024	4.65072	4.09089	6.03321	4.46886	4.10289	4.21332	5.08938	5.44433	4.15706	4.92391	4.25112	4.69404
ENSG00000064547	LPAR2	lysophosphatidic acid receptor 2 [Source:HGNC Symbol;Acc:3168]	19	protein_coding	5.11969	4.56231	4.48569	4.19139	4.27887	4.30315	4.52909	4.50712	4.39517	4.94266	4.8485	3.80548	2.6074	4.06024	4.14402	4.25988	3.92201	3.89736	3.52765	3.65929	4.63476	4.41019	4.70749	4.60049	4.36745	3.65286	4.96209	3.17721	4.77077	3.58326	6.20486	4.28065	4.1061	4.07193	4.69628	4.92011	4.72096	3.99962	4.18335	4.2157
ENSG00000064601	CTSA	cathepsin A [Source:HGNC Symbol;Acc:9251]	20	protein_coding	6.13352	6.24805	6.91394	6.52438	7.39572	8.01896	6.88368	6.95024	6.82796	6.44697	6.88963	6.00885	6.63733	6.37621	6.06345	6.16932	5.53385	6.69685	5.8852	6.08717	6.80224	6.17064	6.34242	7.90191	7.3829	6.84953	7.15462	6.83751	6.15721	6.93584	6.06452	6.58831	6.60285	6.56874	6.06381	5.99708	6.7882	6.68758	7.15898	7.54675
ENSG00000064607	SUGP2	SURP and G patch domain containing 2 [Source:HGNC Symbol;Acc:18641]	19	protein_coding	6.85077	6.14872	6.15516	7.44284	6.44741	5.88791	6.57714	7.02313	6.49799	6.43486	6.48017	5.82348	6.01769	6.16365	6.79973	6.52682	6.6913	6.98186	6.15801	6.48902	6.65109	5.46611	6.31915	6.57944	5.41126	5.86694	6.09548	6.61678	6.42492	6.10864	7.74824	6.66989	7.01738	7.18117	6.64238	7.53683	6.083	7.11869	6.49113	6.35972
ENSG00000064651	SLC12A2	solute carrier family 12 (sodium/potassium/chloride transporter), member 2 [Source:HGNC Symbol;Acc:10911]	5	protein_coding	7.90007	6.54616	7.22456	5.36931	7.46394	5.32671	8.90099	7.28664	5.87565	7.53813	5.87667	6.81681	6.21995	7.53683	7.97253	8.42147	8.33403	7.65513	7.0373	7.64947	5.78312	6.98048	7.62795	6.73143	7.13273	6.35124	7.72325	6.84388	6.11338	5.97796	5.78846	6.73263	6.62144	6.7882	7.6566	6.22882	7.41292	5.12872	5.11708	4.3731
ENSG00000064652	SNX24	sorting nexin 24 [Source:HGNC Symbol;Acc:21533]	5	protein_coding	2.747	4.07757	2.37133	2.32679	3.51042	2.80852	2.65299	1.11567	2.2025	3.07162	3.00923	3.5299	2.39424	1.70515	1.84893	0.521161	2.72021	0.996431	1.57971	1.47689	2.19559	4.12756	1.83899	1.75781	3.01925	2.45575	1.59641	1.27261	3.11839	0.812923	2.95435	3.15708	1.4119	1.94025	3.03693	2.35097	2.55063	2.01402	2.54046	2.24574
ENSG00000064655	EYA2	eyes absent homolog 2 (Drosophila) [Source:HGNC Symbol;Acc:3520]	20	protein_coding	3.99079	4.74991	4.47581	3.58953	1.97486	5.26357	1.65493	2.93573	2.69725	3.29084	1.15004	5.15062	3.30374	4.07975	4.04849	3.9224	3.06728	3.74481	4.14711	3.73537	3.87866	5.68405	3.58997	2.29191	1.22988	6.0587	3.10313	2.67092	0.616956	1.75008	3.98044	3.09206	2.54878	2.37215	4.25922	5.38967	2.77855	3.7876	3.35721	3.30569
ENSG00000064666	CNN2	calponin 2 [Source:HGNC Symbol;Acc:2156]	19	protein_coding	6.33391	4.94664	6.98787	4.94266	7.7171	6.56517	7.1865	7.6141	7.10337	6.91688	6.78129	6.94956	6.75543	7.31443	7.69589	7.53813	6.9028	7.08239	7.50039	7.0388	3.87587	4.71808	7.71557	6.95508	7.06085	7.17329	7.42136	8.00461	7.01448	6.39322	5.59299	7.21827	7.64797	6.96202	6.83307	6.59516	6.79901	7.0462	6.66824	6.2468
ENSG00000064687	ABCA7	ATP-binding cassette, sub-family A (ABC1), member 7 [Source:HGNC Symbol;Acc:37]	19	protein_coding	5.46869	3.51735	5.16466	3.21925	3.91469	5.96829	5.59028	4.80942	5.43085	6.19898	4.65169	4.58826	5.03215	4.97405	4.38005	4.92042	4.37751	5.66591	4.52321	4.60795	4.08076	3.05692	3.33213	4.86633	2.88601	4.49604	4.34359	5.45233	4.24829	4.89842	3.88581	4.47934	6.23002	5.26712	5.22538	4.91693	3.62354	4.03881	5.93001	3.82149
ENSG00000064692	SNCAIP	synuclein, alpha interacting protein [Source:HGNC Symbol;Acc:11139]	5	protein_coding	-0.251029	-0.113008	2.67595	1.7521	0.747713	1.5523	3.16851	1.58491	-0.0652988	-0.134468	0.521161	1.67173	2.97818	1.38716	2.78224	2.47997	2.09311	2.68234	2.6074	2.36923	6.47336	-0.4206	-0.128145	2.33527	0.947981	1.01888	2.64229	2.43335	2.50062	1.43288	-0.28849	0.638746	2.51566	2.65822	1.60284	0.445104	0.572	4.07155	0.531157	0.979594
ENSG00000064703	DDX20	DEAD (Asp-Glu-Ala-Asp) box polypeptide 20 [Source:HGNC Symbol;Acc:2743]	1	protein_coding	5.20738	4.9737	4.42828	5.40995	4.33114	4.9182	5.22177	5.064	4.48301	4.44433	4.44076	5.15704	4.74832	4.71103	5.1881	4.61215	4.64237	4.78187	5.00853	5.07306	4.83186	4.95802	4.64495	4.7749	4.8754	4.5992	4.95112	5.08093	5.53819	5.07336	4.88354	4.99176	5.23054	4.89646	5.06168	4.89744	5.09793	5.80972	4.88509	4.91916
ENSG00000064726	BTBD1	BTB (POZ) domain containing 1 [Source:HGNC Symbol;Acc:1120]	15	protein_coding	4.76685	6.66711	5.32964	6.13229	6.11014	5.60641	6.05449	5.58408	5.64505	6.12359	5.82566	5.26114	6.18344	5.41447	5.58539	5.36407	5.6731	5.45072	5.61726	5.69026	5.77808	5.8446	5.32347	5.89021	5.46407	5.96293	5.29599	5.77667	5.59871	5.86366	5.58185	6.14872	5.5531	5.71955	5.5916	5.37381	5.51465	5.16049	5.88882	5.94077
ENSG00000064763	FAR2	fatty acyl CoA reductase 2 [Source:HGNC Symbol;Acc:25531]	12	protein_coding	1.78029	2.2772	2.7386	2.47376	2.30198	4.93945	4.49769	1.51591	4.60827	5.10644	2.86302	4.05388	3.44892	2.39154	0.996431	2.05715	1.28675	2.35097	3.45039	2.90025	4.56842	6.06309	0.919667	3.13856	3.69591	2.44046	1.60913	1.58179	4.95416	6.21905	3.39359	1.88632	2.78091	1.85516	0.0973239	2.34744	6.38801	2.51093	3.22028	3.12908
ENSG00000064787	BCAS1	breast carcinoma amplified sequence 1 [Source:HGNC Symbol;Acc:974]	20	protein_coding	1.02741	1.03021	1.79541	0.104501	4.67963	-0.364664	-0.582528	-1.68588	-1.60731	3.04283	2.31554	2.87412	-0.119316	3.76539	0.73781	1.11155	2.35097	0.161083	1.74422	0.945076	-2.01333	0.350089	-0.374376	-0.0304894	-2.26396	5.15634	-1.79237	-0.0360167	-4.74443	2.20161	-0.757209	-4.1946	-0.631748	4.21225	1.28175	-2.80583	2.81106	-1.39086	-0.2787	0.177577
ENSG00000064886	CHI3L2	chitinase 3-like 2 [Source:HGNC Symbol;Acc:1933]	1	protein_coding	5.907	5.80389	6.46225	1.94974	3.08898	4.5782	6.8723	6.96882	5.78165	4.30283	3.19046	6.57136	1.93412	5.94005	5.86115	2.61374	3.86293	3.96185	4.64433	3.52145	3.71808	5.89088	1.48143	2.11688	3.57629	5.93241	4.34015	3.7613	3.15759	5.94112	4.60277	3.7492	6.26397	1.64979	-0.159419	5.90947	2.62542	1.76895	4.23628	2.88942
ENSG00000064932	SBNO2	strawberry notch homolog 2 (Drosophila) [Source:HGNC Symbol;Acc:29158]	19	protein_coding	6.36786	6.42302	6.26585	5.88665	6.17378	6.53963	6.92758	6.39779	6.60435	6.06225	6.16798	7.01669	6.41422	6.12488	6.74408	6.0131	5.98233	6.49905	6.39364	6.51499	6.22882	6.78305	5.99028	6.28793	6.42848	6.70188	6.27396	6.61207	6.59094	6.24377	5.85691	6.16629	6.82102	6.28414	5.73179	6.25469	5.15956	5.77774	7.35304	6.05294
ENSG00000064933	PMS1	PMS1 postmeiotic segregation increased 1 (S. cerevisiae) [Source:HGNC Symbol;Acc:9121]	2	protein_coding	4.14885	3.9626	3.70698	5.45233	3.55818	3.75593	4.3292	3.96927	3.48662	3.45914	3.34565	3.6997	3.69074	3.65546	3.67825	3.75555	3.6191	3.82731	3.34106	3.5358	4.76879	4.16641	3.75713	4.1872	4.20275	3.77101	4.44666	3.77928	4.36878	3.52145	4.52516	4.18094	4.00539	4.2062	3.75061	4.24861	4.25045	4.93976	3.7613	4.61924
ENSG00000064961	HMG20B	high mobility group 20B [Source:HGNC Symbol;Acc:5002]	19	protein_coding	6.86397	6.64939	6.24639	6.74353	6.30451	6.09018	7.13183	5.88628	6.18503	5.62871	7.00801	5.95226	5.97566	6.39642	6.34151	6.35378	6.95508	6.20526	6.36375	6.09933	6.92243	6.37225	7.10337	6.68707	7.0719	7.16913	6.68248	6.73209	6.68965	7.20542	6.11382	7.65211	6.92445	7.0848	6.41467	7.12456	6.82282	6.73209	6.69796	7.27532
ENSG00000064989	CALCRL	calcitonin receptor-like [Source:HGNC Symbol;Acc:16709]	2	protein_coding	5.56472	3.78558	5.01722	4.05805	3.55767	4.60472	5.09107	5.57947	4.37718	4.77139	5.17181	4.67196	7.15898	4.20795	4.47019	4.68472	5.11577	5.28957	5.53819	6.00608	4.59569	4.15891	3.67644	4.84921	4.70017	4.69658	4.58635	5.38329	5.01885	5.25538	3.40918	4.47812	4.59538	5.59028	3.23748	4.69849	4.88926	5.58709	4.22431	3.23438
ENSG00000064995	TAF11	TAF11 RNA polymerase II, TATA box binding protein (TBP)-associated factor, 28kDa [Source:HGNC Symbol;Acc:11544]	6	protein_coding	6.19898	5.33265	5.33774	5.65913	5.06305	5.31345	5.01493	4.80523	5.06238	4.21225	5.55505	4.69658	4.78665	5.02455	4.66585	4.6215	4.6906	4.71742	4.68574	4.65136	5.8518	5.17145	5.63674	4.79191	5.83919	4.7678	5.34305	4.7518	4.9111	4.83977	5.28544	5.66797	4.81946	5.00661	5.70336	4.79254	5.00412	5.8615	4.62764	5.17765
ENSG00000064999	ANKS1A	ankyrin repeat and sterile alpha motif domain containing 1A [Source:HGNC Symbol;Acc:20961]	6	protein_coding	6.33304	6.16244	6.40245	5.53689	5.90481	6.53216	5.86822	5.89193	5.93207	5.1542	6.33215	5.96224	5.93388	6.59353	5.60227	5.92009	6.07639	5.72641	5.8292	6.08982	5.7445	6.56096	6.43438	5.53111	6.47336	5.27714	6.05608	5.58408	6.25976	6.04415	6.38847	6.37839	5.71821	5.84311	6.05412	5.39415	5.3975	6.31271	5.47077	5.68538
ENSG00000065000	AP3D1	adaptor-related protein complex 3, delta 1 subunit [Source:HGNC Symbol;Acc:568]	19	protein_coding	7.49787	7.14866	7.12171	7.16064	6.92895	7.3339	7.53813	6.5778	7.07045	7.5124	6.26585	6.63463	6.55076	7.01035	6.7678	6.56264	6.99787	6.46032	6.68654	6.35038	7.13273	6.33813	6.44126	6.83307	6.49905	7.39671	6.86777	6.56213	6.57886	6.73321	6.48742	6.75598	6.5503	6.97132	7.47479	7.62401	5.98877	6.57656	7.02455	6.35882
ENSG00000065029	ZNF76	zinc finger protein 76 [Source:HGNC Symbol;Acc:13149]	6	protein_coding	6.217	4.6215	5.17078	4.80974	4.29519	5.81497	5.44433	4.91633	5.17799	3.93567	5.42558	5.93562	5.12189	5.2557	5.28149	5.03684	5.49526	5.24422	5.11708	4.85261	5.22507	5.11513	5.515	5.14062	5.43808	4.53335	5.10227	5.56403	5.56263	5.43307	4.80652	5.52604	5.41734	5.41477	5.69411	4.73395	4.51203	6.09512	5.15572	4.74031
ENSG00000065054	SLC9A3R2	solute carrier family 9, subfamily A (NHE3, cation proton antiporter 3), member 3 regulator 2 [Source:HGNC Symbol;Acc:11076]	16	protein_coding	5.09455	4.6684	5.57426	4.67163	5.41702	4.49254	5.40024	4.95326	4.43215	5.80783	5.3986	4.91724	6.82164	5.76217	5.40631	5.65577	5.6454	6.35206	6.06617	6.54155	5.31345	4.90163	5.11902	4.99835	4.50941	6.82538	4.4095	5.36896	4.40055	6.12722	4.49082	4.6199	4.54894	5.39415	4.42954	3.89335	5.86733	3.62354	3.97203	3.98347
ENSG00000065057	NTHL1	nth endonuclease III-like 1 (E. coli) [Source:HGNC Symbol;Acc:8028]	16	protein_coding	3.51735	3.68928	3.67436	3.45914	3.50667	3.99996	3.28905	3.05633	3.43292	3.77179	3.184	2.90025	3.59136	3.14713	1.97651	2.82234	2.97175	2.51834	2.38948	2.56538	3.99962	4.25988	3.71456	2.56811	3.1418	3.66266	2.77438	2.19487	3.83271	3.78558	4.01666	3.66878	2.04319	2.29614	4.26399	2.09138	4.36777	2.83587	2.55971	2.20331
ENSG00000065060	UHRF1BP1	UHRF1 binding protein 1 [Source:HGNC Symbol;Acc:21216]	6	protein_coding	6.59249	6.05175	5.94933	6.11968	5.82381	6.07449	5.74926	4.62119	6.0181	5.19729	6.12608	6.18219	5.52108	5.43808	5.23913	5.07505	5.42887	5.27294	5.24517	4.85866	5.32187	5.78312	6.02225	4.69091	6.57038	5.41126	6.18265	5.50391	5.13574	5.79572	6.01348	6.33257	5.52977	5.45725	6.44971	4.88864	4.76879	5.69506	5.75316	5.78917
ENSG00000065135	GNAI3	guanine nucleotide binding protein (G protein), alpha inhibiting activity polypeptide 3 [Source:HGNC Symbol;Acc:4387]	1	protein_coding	6.5209	6.65665	5.78744	6.25681	6.07411	6.27437	6.34789	6.35609	5.94858	6.43124	6.22753	6.33133	5.82315	5.77524	5.66511	5.67276	5.83813	5.78347	5.78054	5.91825	5.56904	6.6743	6.25681	5.71021	6.44398	6.29795	6.41285	5.88378	6.58565	5.97904	5.7888	6.20391	6.24086	5.92808	6.34789	5.5308	6.43347	6.24843	6.11338	6.75183
ENSG00000065150	IPO5	importin 5 [Source:HGNC Symbol;Acc:6402]	13	protein_coding	6.94154	7.20639	6.71085	7.14094	6.94685	6.65388	7.50039	6.8241	7.34352	6.77769	7.35803	7.39472	7.31238	6.7459	6.96471	7.02907	7.01308	6.7453	6.91951	7.10565	7.45573	7.41292	8.41855	6.81567	7.83585	7.62929	7.29737	6.6147	6.35972	6.74938	7.19167	7.65973	6.86777	6.08795	7.33888	7.81702	5.6707	6.67151	6.02466	6.43026
ENSG00000065154	OAT	ornithine aminotransferase [Source:HGNC Symbol;Acc:8091]	10	protein_coding	8.87178	8.60844	7.75618	5.37024	7.7004	6.63408	6.33257	7.22896	6.23525	7.70795	7.38088	6.70754	6.32131	7.18735	7.53309	7.19933	7.31041	6.99787	7.32167	7.05767	6.99641	6.67269	6.88622	6.46225	7.45804	6.38628	7.27428	6.92243	6.27943	7.63865	6.89358	7.1563	7.19086	7.51778	6.19623	7.31142	9.98305	6.03407	7.03269	6.90597
ENSG00000065183	WDR3	WD repeat domain 3 [Source:HGNC Symbol;Acc:12755]	1	protein_coding	5.11645	6.51155	5.49702	6.03896	5.5557	5.94821	5.78675	6.16007	5.51737	4.92104	4.90099	6.02466	5.17046	5.29797	5.24103	5.11379	5.27172	4.97082	5.02732	5.55408	6.01847	5.94355	5.49765	5.60465	5.61892	5.32347	6.23199	4.869	6.45015	5.9439	6.1718	5.50425	5.76908	5.76426	5.576	5.98306	6.09245	5.9608	5.08527	5.75493
ENSG00000065243	PKN2	protein kinase N2 [Source:HGNC Symbol;Acc:9406]	1	protein_coding	6.12094	5.7888	5.4514	6.17985	5.23842	5.79709	6.04458	5.78132	5.9453	5.50672	6.0587	5.9548	6.00266	5.86115	6.03407	5.88292	6.03407	5.97415	5.95406	5.8446	4.68288	6.07018	6.1051	5.91387	5.81566	5.78418	5.71515	5.49966	6.37796	5.83675	5.91682	6.71496	5.79639	5.82348	5.02547	5.12032	5.88378	6.32687	5.44303	5.53416
ENSG00000065268	WDR18	WD repeat domain 18 [Source:HGNC Symbol;Acc:17956]	19	protein_coding	4.68539	5.03144	3.62521	4.64849	4.74536	5.10958	4.24793	4.11708	3.97278	4.63622	4.31694	4.95863	4.00361	3.78957	4.32729	4.8619	4.18937	4.01518	4.01448	3.67042	5.29021	4.05691	4.62408	4.25888	4.77999	4.21082	3.66355	4.14677	5.22379	3.29383	4.90229	4.77969	4.16221	4.04674	5.37088	4.77171	3.83997	3.92201	4.44828	3.43142
ENSG00000065308	TRAM2	translocation associated membrane protein 2 [Source:HGNC Symbol;Acc:16855]	6	protein_coding	5.55011	6.10394	6.05608	6.34789	6.47874	5.69227	5.75357	5.95559	6.12015	5.61759	5.6992	5.38834	5.72791	5.33297	5.08345	5.97759	5.09039	5.90626	5.59331	5.42985	5.02763	5.41544	5.5892	5.5204	7.01521	5.8346	5.68712	6.11014	4.74161	5.84636	5.66657	5.49863	5.51227	5.88251	7.19759	5.43207	5.70233	6.23041	6.49707	6.6063
ENSG00000065320	NTN1	netrin 1 [Source:HGNC Symbol;Acc:8029]	17	protein_coding	1.30842	3.74069	3.28255	3.98007	6.35609	3.43792	1.92049	4.53631	5.62541	2.28591	3.35521	5.65288	3.47739	3.61089	4.93649	3.9781	4.36275	3.22633	4.32478	3.87306	5.52708	7.38189	6.43852	2.80852	4.14263	4.4643	5.70517	3.69236	5.50157	2.2443	5.96154	5.50126	3.43336	1.69128	1.8016	4.48439	3.83119	3.61089	2.5221	5.10958
ENSG00000065328	MCM10	minichromosome maintenance complex component 10 [Source:HGNC Symbol;Acc:18043]	10	protein_coding	4.26021	3.17926	4.17071	3.74108	4.39294	5.33868	4.27683	3.44848	5.33464	4.11067	5.15354	3.25449	2.21953	1.65691	-0.569099	0.201031	0.285963	1.36001	-0.982138	0.579514	6.38404	5.21954	5.43053	8.03559	4.73236	5.79747	4.93153	2.51631	5.12189	2.66753	5.38428	5.09455	3.01749	4.71845	5.19262	5.54155	4.80486	5.1297	4.16897	4.42437
ENSG00000065357	DGKA	diacylglycerol kinase, alpha 80kDa [Source:HGNC Symbol;Acc:2849]	12	protein_coding	4.66327	4.73866	3.99377	4.72589	5.52504	4.66105	4.56779	5.49733	5.05498	5.76146	6.0799	5.58049	4.2062	3.99556	4.78477	5.05277	4.6684	5.95406	4.80714	5.2736	3.19698	3.16321	2.84411	5.19135	3.67352	5.158	3.42315	6.61627	5.08312	4.08905	4.62634	4.06099	7.25231	5.44433	3.18141	4.24313	5.52636	5.14093	5.84242	4.27821
ENSG00000065361	ERBB3	v-erb-b2 avian erythroblastic leukemia viral oncogene homolog 3 [Source:HGNC Symbol;Acc:3431]	12	protein_coding	9.21323	6.75054	7.29632	9.80736	6.43758	6.0476	8.50924	7.05074	6.80651	7.02688	7.28389	6.73386	5.11218	8.20273	8.31512	8.21744	8.96582	7.19352	7.90932	6.98114	7.61825	7.95685	8.73833	7.04031	8.90099	7.13689	8.01689	7.33293	6.78875	8.69424	7.44169	7.93758	7.55922	7.61152	6.25722	6.29659	7.54799	3.87513	6.05212	2.52471
ENSG00000065371	ROPN1	rhophilin associated tail protein 1 [Source:HGNC Symbol;Acc:17692]	3	protein_coding	3.19364	4.15527	2.73629	-1.22094	0.615162	-1.3686	-3.00237	2.20481	3.97	-2.77504	1.56975	-1.7475	0.605695	1.96591	1.25863	1.91353	-0.122492	1.43288	1.76608	2.11919	3.95627	1.09212	4.15994	-0.991235	4.23963	-4.09933	3.33115	-0.0499645	1.62385	-3.16724	1.90233	2.31343	1.13773	-2.86803	0.602268	1.99349	0.0440331	0.287995	0.768075	-3.00237
ENSG00000065413	ANKRD44	ankyrin repeat domain 44 [Source:HGNC Symbol;Acc:25259]	2	protein_coding	4.81006	4.00138	3.48341	7.28477	3.84619	5.40439	4.88415	5.04289	5.62197	4.38789	6.2735	4.83125	4.03628	3.59312	4.83977	4.54828	3.78637	5.77912	4.52843	4.50816	3.5859	4.41771	4.20862	4.9814	4.14192	3.545	3.49107	6.251	3.98524	4.25216	4.10072	4.41085	6.81334	5.57837	3.60065	3.76579	4.0243	3.7759	6.51451	3.89535
ENSG00000065427	KARS	lysyl-tRNA synthetase [Source:HGNC Symbol;Acc:6215]	16	protein_coding	7.3046	7.16243	6.73494	6.94154	7.08634	7.78695	6.68487	7.49058	7.6566	6.94502	6.50108	7.12379	6.63572	6.50624	6.64302	6.77462	6.47676	6.64529	6.67377	6.60435	7.02238	7.06639	7.11382	6.94077	7.2128	6.34329	6.64882	6.53561	7.05767	6.44829	6.89619	7.228	7.0388	6.50346	6.809	7.06794	6.65388	6.4815	6.99641	6.54768
ENSG00000065457	ADAT1	adenosine deaminase, tRNA-specific 1 [Source:HGNC Symbol;Acc:228]	16	protein_coding	5.73255	4.31178	4.79055	5.42396	4.80774	5.84421	5.31992	5.39447	5.30105	5.05531	4.57524	4.40768	4.70363	4.7165	5.02612	4.7088	5.0875	4.90933	4.72559	4.76436	4.23761	4.36916	5.34917	4.92862	5.10456	4.78383	4.19967	4.83666	4.80354	4.99267	4.23044	4.98516	4.89611	5.28312	4.70712	4.83381	4.54156	4.31211	4.61343	3.77842
ENSG00000065485	PDIA5	protein disulfide isomerase family A, member 5 [Source:HGNC Symbol;Acc:24811]	3	protein_coding	4.12896	5.05563	4.83726	4.03802	4.34759	3.63773	4.42529	4.77936	4.68029	4.57884	3.16467	4.78061	3.98669	3.80083	2.54548	3.39546	3.7662	3.42646	3.75965	3.23748	4.75942	4.90383	4.20694	4.30117	4.76983	4.64078	5.11513	3.70904	5.17734	5.03522	3.93567	4.45357	3.53338	4.38859	5.35802	3.74108	6.05212	4.72327	4.86664	5.71724
ENSG00000065491	TBC1D22B	TBC1 domain family, member 22B [Source:HGNC Symbol;Acc:21602]	6	protein_coding	4.45227	4.85759	3.97507	3.87785	3.76047	4.08518	3.80588	3.84425	4.38553	3.3466	2.91686	4.56457	3.26063	3.72178	3.58063	3.30086	3.50056	3.57543	3.56712	3.47842	3.69591	3.82849	4.12297	3.38245	5.17212	3.86544	4.75563	3.37392	4.50223	3.53164	3.92277	4.1376	3.97278	3.92049	4.21719	3.31582	3.12364	4.28609	3.51317	4.01862
ENSG00000065518	NDUFB4	NADH dehydrogenase (ubiquinone) 1 beta subcomplex, 4, 15kDa [Source:HGNC Symbol;Acc:7699]	3	protein_coding	6.18306	5.72464	5.43307	4.69849	5.10289	5.36471	6.13884	5.2458	5.21253	5.34235	4.6115	5.57837	5.44929	5.06941	4.86317	5.06907	5.09732	5.147	4.9886	4.85991	5.91387	6.34456	6.08145	5.67106	6.0139	6.16667	6.48106	5.47945	7.12256	6.6363	5.7359	5.85215	5.5257	5.57494	5.99855	5.87253	7.32358	6.01615	6.03321	6.71321
ENSG00000065526	SPEN	spen family transcriptional repressor [Source:HGNC Symbol;Acc:17575]	1	protein_coding	7.40984	6.85147	6.86976	7.72944	6.77886	6.95999	7.25045	7.0462	7.14017	7.01377	6.89619	7.16161	6.97915	7.49552	7.87821	7.68495	7.28477	7.68495	7.67449	7.76258	7.64797	7.23793	7.72479	7.4513	6.87765	6.90534	6.80651	7.55419	6.90922	7.10413	7.36005	7.86389	7.72325	7.83931	7.11297	7.38189	7.20016	8.36714	7.27714	7.14017
ENSG00000065534	MYLK	myosin light chain kinase [Source:HGNC Symbol;Acc:7590]	3	protein_coding	5.08845	7.53562	7.56414	5.90091	8.20761	5.64749	7.30649	7.81194	7.11869	6.64627	6.55842	5.40536	7.17593	9.13556	9.1406	8.35323	8.14111	7.88908	9.09592	8.02102	4.58247	6.74408	6.03861	6.68021	7.26671	6.86577	7.3829	8.09812	5.37646	6.71033	5.13033	5.95887	7.92429	6.79718	5.74926	5.92543	8.00461	7.84453	5.87145	6.83241
ENSG00000065548	ZC3H15	zinc finger CCCH-type containing 15 [Source:HGNC Symbol;Acc:29528]	2	protein_coding	6.13039	5.99383	5.10958	6.12683	5.16109	5.30871	5.30136	5.52671	3.43387	5.53416	5.23776	5.57566	5.3518	4.93591	5.20284	5.0566	5.18288	4.8928	5.27955	5.58216	5.88486	5.87459	4.90811	5.09107	5.81248	5.52844	5.75957	5.04626	5.7066	4.85547	5.18453	5.23116	5.26752	5.07901	4.82357	5.45833	5.61093	4.96147	5.45585	6.46076
ENSG00000065559	MAP2K4	mitogen-activated protein kinase kinase 4 [Source:HGNC Symbol;Acc:6844]	17	protein_coding	4.34496	4.37879	5.03492	3.52631	4.51203	4.88797	4.5206	4.20829	4.05883	4.1331	4.44208	5.05113	4.53104	4.99176	4.56779	4.68257	4.99387	4.47109	4.74991	4.66197	3.66311	5.00883	4.84651	4.45969	4.49604	5.05981	4.38989	4.38619	4.68257	4.32282	4.052	4.76879	4.58533	4.16641	4.7422	4.41213	4.27821	3.71664	4.44433	4.42074
ENSG00000065600	TMEM206	transmembrane protein 206 [Source:HGNC Symbol;Acc:25593]	1	protein_coding	3.64683	4.53406	4.03734	3.8996	3.55667	3.6227	4.07513	4.16261	3.78441	3.84824	3.76088	3.6807	1.98683	2.15321	2.2443	1.71035	1.56872	2.5221	1.83351	1.52853	4.62831	4.28779	3.66134	2.63042	4.50128	3.00548	4.46759	3.05924	5.12905	3.67042	4.76068	3.60281	3.21174	2.80795	3.20672	3.57896	4.77801	4.17417	3.63467	3.33899
ENSG00000065609	SNAP91	synaptosomal-associated protein, 91kDa [Source:HGNC Symbol;Acc:14986]	6	protein_coding	-3.16724	0.583262	-0.61151	-1.23659	-3.71354	-3.2274	-4.05566	-2.98207	-2.01333	-3.45671	-1.96951	-1.57895	-4.49641	-2.83772	-1.159	-5.45477	-3.37633	-3.20724	-1.80019	-2.51426	1.69427	2.23221	-0.26313	-5.45477	-1.85558	-1.92832	-0.193091	-0.104499	1.10468	-2.21548	-0.903453	-0.544777	-2.69094	-2.39073	2.23762	0.312975	-3.777	2.85661	-0.444698	-4.01423
ENSG00000065613	SLK	STE20-like kinase [Source:HGNC Symbol;Acc:11088]	10	protein_coding	5.46174	6.59462	6.07056	5.16433	6.63517	5.79468	6.03407	5.92653	5.58604	6.92895	6.1376	6.66989	6.80525	6.56003	6.68021	6.63025	6.68707	6.50439	6.88622	6.72623	5.51938	6.00842	6.38847	6.46032	5.28086	6.30401	6.58831	6.57832	6.50439	7.27144	6.30312	6.57038	6.51499	6.72057	6.26963	5.85504	6.93309	7.13273	6.2692	5.95812
ENSG00000065615	CYB5R4	cytochrome b5 reductase 4 [Source:HGNC Symbol;Acc:20147]	6	protein_coding	2.81879	3.29383	3.06136	3.90306	3.7124	3.86015	4.1354	3.18893	3.64349	2.71773	3.53856	3.21771	3.55767	2.87833	3.23748	2.27291	3.37154	3.19307	3.38643	2.84238	3.99996	3.92201	4.40736	2.77495	3.04671	3.56125	3.88371	3.59136	4.55998	3.09312	3.67991	3.89736	3.96963	2.71838	3.86293	3.41246	2.72702	4.43183	4.06441	3.71808
ENSG00000065618	COL17A1	collagen, type XVII, alpha 1 [Source:HGNC Symbol;Acc:2194]	10	protein_coding	1.45731	3.27783	6.59717	-0.0468426	2.35611	1.11289	-0.749405	6.49656	-0.0854507	4.33517	3.25596	3.48832	5.34367	8.50611	8.53456	8.29388	7.81026	7.64666	7.93567	7.63451	2.46838	-1.23659	2.71055	6.22882	-0.680082	0.0268566	1.34581	6.88556	5.84421	5.55215	0.0756536	-0.317832	7.08315	4.98359	4.55484	3.82889	-0.0329971	7.6759	-1.46189	3.08898
ENSG00000065621	GSTO2	glutathione S-transferase omega 2 [Source:HGNC Symbol;Acc:23064]	10	protein_coding	0.319178	5.13191	3.90575	1.65691	4.88013	2.06969	0.927667	3.52673	2.83472	0.897336	3.95474	3.73988	2.89958	4.65332	5.0586	4.62408	4.74253	3.66051	4.09052	4.37471	0.905494	2.04514	0.0413281	2.42442	2.15764	2.20867	0.699098	2.47663	1.23817	4.03768	0.570058	1.23405	2.62739	4.33083	4.08189	3.84041	3.9201	2.12854	-0.435182	1.02467
ENSG00000065665	SEC61A2	Sec61 alpha 2 subunit (S. cerevisiae) [Source:HGNC Symbol;Acc:17702]	10	protein_coding	3.22729	2.08412	0.994893	2.01315	1.96963	3.36013	2.97924	0.900509	2.6059	3.43926	2.73362	2.14405	1.99188	1.36589	0.942163	0.803235	2.38719	1.74422	1.64599	1.67766	3.67001	2.73303	3.04067	4.35473	2.52992	5.53416	3.19806	1.37581	2.45639	1.9995	2.78876	2.83472	2.32891	3.86293	3.06084	3.38929	2.93931	3.42315	2.58257	4.24417
ENSG00000065675	PRKCQ	protein kinase C, theta [Source:HGNC Symbol;Acc:9410]	10	protein_coding	1.18161	0.914847	-0.0280087	0.852428	1.72526	2.55773	1.88632	1.69231	3.4587	0.864192	2.74643	2.40849	-0.925197	0.816275	1.21792	2.13087	0.809683	2.55971	0.501402	0.474325	2.02028	3.93412	-1.41522	1.30842	1.27392	-0.137026	1.71431	2.73439	2.43413	0.307836	3.18246	1.29336	3.7172	1.33234	4.59827	0.246973	-0.358702	2.23306	3.72011	1.44814
ENSG00000065717	TLE2	transducin-like enhancer of split 2 (E(sp1) homolog, Drosophila) [Source:HGNC Symbol;Acc:11838]	19	protein_coding	1.17661	4.76561	4.90811	2.96691	4.34219	4.22833	2.02539	4.90229	3.87343	4.67455	5.50294	5.00479	5.52243	5.03748	4.98262	4.89744	5.13002	5.11413	5.0406	5.47747	2.67407	4.64721	4.52651	4.05314	3.25646	4.68257	4.40203	4.33017	1.01311	3.22126	1.5776	5.38709	4.19212	3.75351	3.2661	4.46565	2.69601	2.35611	2.49932	4.19383
ENSG00000065802	ASB1	ankyrin repeat and SOCS box containing 1 [Source:HGNC Symbol;Acc:16011]	2	protein_coding	5.11448	4.01862	4.54277	5.38292	4.06582	3.58415	4.54403	5.19633	4.33176	4.6199	4.62959	4.36079	5.36962	5.34917	5.70404	5.42252	5.21382	4.80683	5.37348	5.99672	4.37144	3.81096	5.38903	4.4516	4.1269	4.62408	5.00129	4.94397	4.93912	4.20587	4.23454	5.77591	5.06875	4.68825	4.69341	3.63511	4.49704	5.34887	3.99183	6.14398
ENSG00000065809	FAM107B	family with sequence similarity 107, member B [Source:HGNC Symbol;Acc:23726]	10	protein_coding	5.93207	4.71712	5.28179	4.75698	5.55879	6.27782	5.72134	5.53449	6.32915	6.401	6.15478	5.82853	6.42492	5.84531	5.63124	5.23535	6.1384	5.38565	6.00729	5.54462	6.02431	5.77628	6.6468	8.2627	5.29765	8.55065	5.66553	6.29144	6.28634	6.15395	5.12448	5.0318	6.31702	6.44126	4.25547	5.56809	6.65715	5.86972	6.74996	6.07912
ENSG00000065833	ME1	malic enzyme 1, NADP(+)-dependent, cytosolic [Source:HGNC Symbol;Acc:6983]	6	protein_coding	4.83881	6.08337	4.01483	2.90802	2.62342	5.60986	3.2463	3.34941	2.87954	5.06138	2.96517	3.20376	6.02502	2.84118	0.366873	1.59847	0.989097	2.3659	5.91162	2.85234	4.24688	4.66327	3.55397	3.13436	3.69885	6.55479	4.24097	2.14329	4.89678	4.61538	4.5111	1.98061	2.29122	3.0947	3.94298	5.4514	4.07155	3.77297	3.95887	5.63437
ENSG00000065882	TBC1D1	TBC1 (tre-2/USP6, BUB2, cdc16) domain family, member 1 [Source:HGNC Symbol;Acc:11578]	4	protein_coding	6.5336	6.75901	6.10668	6.13269	5.56231	7.87821	6.04208	6.63176	7.15205	5.93705	6.67851	5.83919	5.52274	6.00766	5.66591	5.63124	5.06973	6.20303	5.83315	6.03932	5.78567	5.91085	7.81026	6.23406	7.04325	5.66725	6.32085	6.03932	6.36654	5.03369	6.88169	6.06982	6.31447	5.34036	6.77405	6.80404	5.30646	5.63873	6.48698	6.71777
ENSG00000065883	CDK13	cyclin-dependent kinase 13 [Source:HGNC Symbol;Acc:1733]	7	protein_coding	6.67216	6.14522	6.53654	6.57289	6.33173	6.81681	6.38357	6.29574	6.36331	6.77517	6.27099	6.40056	5.88333	6.51017	6.32876	6.43395	6.2472	6.57447	6.33005	6.37135	6.65924	6.45611	7.29632	6.39066	5.6543	6.72567	6.24507	6.60895	6.76494	6.8145	6.7229	6.00532	6.57232	7.04031	6.14639	5.83136	6.38755	6.57341	6.38982	6.44502
ENSG00000065911	MTHFD2	methylenetetrahydrofolate dehydrogenase (NADP+ dependent) 2, methenyltetrahydrofolate cyclohydrolase [Source:HGNC Symbol;Acc:7434]	2	protein_coding	7.63865	8.18979	5.97046	7.13605	6.89237	6.77341	7.26375	6.92509	6.7459	6.88685	6.90011	6.86026	5.34697	5.43578	5.39991	5.63368	7.12945	5.30741	5.20903	6.22963	7.15816	7.3339	6.78931	6.60021	6.7138	7.10337	7.55922	5.95887	7.66986	6.97279	7.92997	6.42492	6.39238	7.05235	7.74193	6.49565	8.01484	5.30584	7.28389	6.77578
ENSG00000065923	SLC9A7	solute carrier family 9, subfamily A (NHE7, cation proton antiporter 7), member 7 [Source:HGNC Symbol;Acc:17123]	X	protein_coding	3.6945	5.80001	7.34105	2.0178	3.4161	4.10908	4.55964	4.70521	4.4938	4.99939	3.84173	3.17367	1.95838	6.17414	5.06468	4.52779	4.28098	4.447	4.53509	4.27959	5.87929	6.09855	3.25021	3.97313	3.49431	3.32695	5.71375	4.16142	5.58083	4.11458	4.03768	3.29793	4.37686	4.12403	3.72662	5.3623	4.58309	3.00343	4.72856	2.67276
ENSG00000065970	FOXJ2	forkhead box J2 [Source:HGNC Symbol;Acc:24818]	12	protein_coding	5.41299	6.70522	6.22963	4.71293	5.72862	5.30584	4.9374	6.12608	5.30584	5.2192	5.18422	5.01918	5.47281	6.16007	6.07717	5.76794	5.46511	5.65744	5.96189	5.70878	4.99416	5.56156	5.80863	5.87667	4.21188	5.44108	4.91071	5.55443	6.27643	5.28957	5.31929	5.42821	5.15354	5.22144	5.97415	6.20646	3.80194	5.45265	5.24644	5.36125
ENSG00000065978	YBX1	Y box binding protein 1 [Source:HGNC Symbol;Acc:8014]	1	protein_coding	8.05675	8.87743	9.15073	8.56039	7.50757	8.20761	7.77063	8.53456	7.89273	7.65211	8.71243	8.33131	7.6892	8.21251	7.34205	7.42352	7.00661	7.41498	7.31536	7.36419	9.86003	9.62462	9.04329	9.18161	9.92464	8.273	9.64694	8.79167	9.73251	9.92464	10.0986	9.39622	9.17124	8.60688	9.88728	9.02003	9.43997	10.0552	9.37792	10.1789
ENSG00000065989	PDE4A	phosphodiesterase 4A, cAMP-specific [Source:HGNC Symbol;Acc:8780]	19	protein_coding	2.75259	3.49605	3.52365	4.52153	5.08904	2.88009	3.58459	3.34896	4.17143	3.67085	3.73622	2.68619	4.64013	3.55353	3.6146	2.85291	2.76219	3.64391	3.63729	3.58154	3.03746	3.45284	2.11282	3.3466	3.07722	4.65495	3.40167	3.82651	2.8878	3.36631	2.81163	2.74763	2.79057	2.52992	4.05805	4.44398	3.13076	1.63922	4.19482	4.79254
ENSG00000066027	PPP2R5A	protein phosphatase 2, regulatory subunit B', alpha [Source:HGNC Symbol;Acc:9309]	1	protein_coding	5.82381	5.53755	6.40785	4.0558	4.85961	5.50564	5.67342	5.9446	6.50108	6.06189	5.89055	6.59717	6.96202	6.11573	5.02794	5.63402	5.70728	5.96759	5.3657	5.52671	5.33464	5.10897	6.19049	5.35867	5.43943	5.70268	4.9111	5.43439	4.30385	6.40149	6.03628	4.78603	5.79828	5.54287	4.32086	5.46063	5.96115	5.17668	5.14957	3.67395
ENSG00000066044	ELAVL1	ELAV like RNA binding protein 1 [Source:HGNC Symbol;Acc:3312]	19	protein_coding	5.7257	6.22077	6.32876	6.58371	5.9367	6.1584	6.30657	5.91825	6.32958	5.77667	6.04415	6.25681	5.40341	6.03969	5.91422	5.62985	5.88378	5.34305	5.58954	5.65327	6.72183	6.7882	6.60385	5.86332	6.8731	6.08145	6.47974	5.46771	6.57395	5.20029	6.74013	6.91624	5.72097	5.5237	6.70754	6.61002	6.32042	6.03896	5.76321	6.39024
ENSG00000066056	TIE1	tyrosine kinase with immunoglobulin-like and EGF-like domains 1 [Source:HGNC Symbol;Acc:11809]	1	protein_coding	3.19546	3.52187	4.67032	3.20113	4.07304	3.98416	4.61634	5.53689	3.97203	4.36177	4.7537	4.44898	7.444	5.09355	4.74129	5.70099	5.33265	6.60686	5.59905	6.43347	3.00497	2.61059	3.73667	5.18613	4.28916	4.57464	4.14746	5.39447	4.39851	4.47455	3.42646	4.19383	5.07213	5.08527	3.07162	3.87708	4.35832	3.42364	4.18862	2.92829
ENSG00000066084	DIP2B	DIP2 disco-interacting protein 2 homolog B (Drosophila) [Source:HGNC Symbol;Acc:29284]	12	protein_coding	7.13605	5.99598	6.1512	8.61706	8.66212	6.891	7.58105	6.22498	6.19741	7.29737	7.49298	6.1512	5.79251	6.44227	6.94883	6.60123	6.76727	6.401	6.49609	6.23645	6.74768	6.72947	6.63333	6.361	6.21622	6.68307	6.29184	6.61883	6.21821	5.98088	7.09424	7.56818	6.54055	7.09424	6.63682	6.15801	6.29931	6.59249	6.52142	6.37225
ENSG00000066117	SMARCD1	SWI/SNF related, matrix associated, actin dependent regulator of chromatin, subfamily d, member 1 [Source:HGNC Symbol;Acc:11106]	12	protein_coding	6.24507	5.98769	5.51163	6.64047	6.7459	5.64675	6.1512	5.64749	5.58993	6.12443	5.816	5.66015	6.20685	5.86332	6.42212	6.23645	6.03702	6.20564	6.27479	6.30272	6.28414	5.4871	6.03125	5.67035	5.99672	5.77402	5.73391	5.8583	6.2692	5.32087	6.59353	6.36145	5.91608	5.97454	6.07138	5.67143	5.59825	6.12801	5.99818	6.39154
ENSG00000066135	KDM4A	lysine (K)-specific demethylase 4A [Source:HGNC Symbol;Acc:22978]	1	protein_coding	6.16846	6.26963	6.55842	6.65602	5.86082	6.28964	5.95629	6.59717	6.37135	5.74754	6.11181	5.68201	5.60159	6.41285	6.08068	6.18503	5.87493	6.05212	5.89021	5.52745	5.93562	6.81087	5.56116	6.60946	7.36323	5.36538	6.69741	5.97689	6.809	6.16667	6.35293	6.02	5.96224	5.71021	7.08972	5.36993	6.43438	6.59819	6.38847	7.14542
ENSG00000066136	NFYC	nuclear transcription factor Y, gamma [Source:HGNC Symbol;Acc:7806]	1	protein_coding	5.13999	4.65169	5.28475	4.65715	4.45568	5.1387	4.67518	4.41736	4.68158	4.81227	4.87789	4.91071	4.43916	5.13316	4.88766	5.03011	4.64978	4.43215	4.80136	4.63796	5.33774	5.87046	4.83348	5.06973	6.09323	4.72723	4.82104	4.99083	5.38903	5.78638	5.57837	5.24194	5.13904	5.1513	6.40379	4.99572	4.65072	5.51004	5.3417	5.25269
ENSG00000066185	ZMYND12	zinc finger, MYND-type containing 12 [Source:HGNC Symbol;Acc:21192]	1	protein_coding	-0.479349	-1.17542	1.63608	0.442998	-0.488977	-0.22282	-0.0417397	0.93907	0.312975	-1.40959	-0.991235	0.0166287	1.16046	0.659018	0.189468	-0.895407	1.73909	0.135843	0.242712	-0.3337	0.651773	2.16607	-0.631748	-0.775856	0.462275	0.407432	-0.862526	-1.14884	-0.0908834	0.495768	-1.11395	0.116758	-1.29821	-0.101669	1.12126	-1.38561	0.354282	-1.65741	-0.964828	-0.508743
ENSG00000066248	NGEF	neuronal guanine nucleotide exchange factor [Source:HGNC Symbol;Acc:7807]	2	protein_coding	2.99432	-0.991235	2.34437	6.12645	0.189468	-0.208264	1.78676	1.76236	0.0946891	1.62053	3.17565	-0.880802	-0.4206	1.30962	2.29614	-0.825923	-0.28849	-1.10833	0.255997	0.379723	2.31415	5.26418	4.90964	0.478185	2.55002	2.04234	1.46869	0.445104	0.268153	-0.628265	0.153273	3.32272	0.124268	2.16533	1.89947	3.22173	2.66442	1.11155	-0.599652	2.39353
ENSG00000066279	ASPM	asp (abnormal spindle) homolog, microcephaly associated (Drosophila) [Source:HGNC Symbol;Acc:19048]	1	protein_coding	6.21239	6.87105	6.92826	7.50164	6.34242	6.739	5.74008	6.41008	7.51358	4.97619	6.77341	6.8824	0.935481	4.63057	3.62313	1.97407	3.19601	4.24977	1.57295	0.519355	7.77388	6.7229	7.84453	6.53414	6.59619	5.9179	6.51945	4.81538	7.94332	5.84034	7.38923	7.04395	5.7472	5.77088	6.83817	8.12736	6.91068	7.94717	6.02036	8.66565
ENSG00000066294	CD84	CD84 molecule [Source:HGNC Symbol;Acc:1704]	1	protein_coding	5.06754	4.41115	4.0122	4.18901	6.0799	6.33005	6.37043	5.48047	5.71855	5.29731	7.21827	5.28669	4.42405	2.97355	4.52547	4.97653	3.90854	6.07874	4.55773	5.03215	4.17001	4.99206	4.47747	6.53216	5.35802	5.14258	5.08154	6.45153	3.80001	4.94949	4.74733	5.0478	6.29449	5.79784	2.52535	4.48795	4.60277	4.22085	7.14942	5.16079
ENSG00000066322	ELOVL1	ELOVL fatty acid elongase 1 [Source:HGNC Symbol;Acc:14418]	1	protein_coding	7.02313	7.48821	6.90466	5.34948	5.95041	6.78417	6.41422	6.86777	6.30911	6.50048	7.11618	6.81274	6.50776	6.33257	5.49765	5.84531	5.81182	5.95226	5.80935	6.20486	6.54817	6.65665	5.69807	6.28275	7.15119	6.32687	6.58614	6.12683	5.81216	7.07609	7.05388	6.06309	6.55479	6.30613	6.20954	5.29967	6.83676	5.7465	6.61156	7.09046
ENSG00000066336	SPI1	spleen focus forming virus (SFFV) proviral integration oncogene [Source:HGNC Symbol;Acc:11241]	11	protein_coding	3.82261	4.11033	3.39687	3.76907	5.21798	5.08435	4.61827	4.26094	5.18062	4.76622	5.00661	4.4643	4.11884	1.39537	3.59921	3.54988	1.79982	4.6089	3.2172	3.51042	3.81017	4.85261	3.60741	4.98016	4.93153	4.3804	4.59795	5.17109	4.44633	4.05043	4.12143	4.76914	4.82039	4.45698	2.59178	3.65546	3.99849	3.66789	6.33257	4.84891
ENSG00000066379	ZNRD1	zinc ribbon domain containing 1 [Source:HGNC Symbol;Acc:13182]	6	protein_coding	4.42405	4.22051	3.72662	4.49604	3.83947	3.61958	3.73582	3.79378	4.22396	3.2585	4.07904	4.11101	3.50996	3.79545	3.58371	3.66789	3.8996	3.62056	2.91793	3.24527	4.08481	4.6726	4.58405	4.35203	5.12937	3.71929	4.60277	4.57619	4.91603	4.25619	4.14116	4.90009	4.23076	4.45764	4.79021	3.51735	3.83158	4.95863	4.54156	4.68257
ENSG00000066382	MPPED2	metallophosphoesterase domain containing 2 [Source:HGNC Symbol;Acc:1180]	11	protein_coding	2.03128	-0.251029	4.25727	2.09731	-0.665652	-1.47901	-0.4206	2.78392	0.768075	0.0587703	1.43171	-0.408006	2.1216	2.06743	2.61124	1.21912	2.99536	1.97327	2.27013	1.16603	1.73268	1.68622	5.99491	-0.461371	2.76393	-0.0150619	-0.969431	0.323338	2.69538	-0.381468	-0.572741	0.564254	0.763029	-0.741869	1.82902	4.34359	-0.0990215	2.8122	2.84997	2.23605
ENSG00000066422	ZBTB11	zinc finger and BTB domain containing 11 [Source:HGNC Symbol;Acc:16740]	3	protein_coding	5.78489	5.67475	5.73721	5.94784	5.30615	5.41998	5.68232	5.74893	5.26325	5.17602	5.78744	5.90262	5.1513	5.65913	5.83208	5.87287	5.61892	5.92265	5.76462	5.77402	5.22442	5.54803	4.7068	5.93001	6.12399	5.4229	5.80317	5.76104	5.90481	6.09933	5.03369	5.7824	5.72714	6.03159	5.24485	5.44334	6.09548	6.24337	5.58954	5.73522
ENSG00000066427	ATXN3	ataxin 3 [Source:HGNC Symbol;Acc:7106]	14	protein_coding	5.08062	4.38421	4.12657	5.01015	4.7262	4.0274	4.02127	4.75341	4.76436	4.60858	5.54155	4.95683	5.49293	4.869	5.6536	5.26387	5.22014	5.53322	5.20122	5.702	4.24064	4.07231	4.56199	5.00289	4.99297	4.42468	3.99183	4.77833	3.74029	4.97148	4.60602	4.91204	4.88926	4.87857	4.35505	4.11315	3.94188	4.64818	4.32055	4.18094
ENSG00000066455	GOLGA5	golgin A5 [Source:HGNC Symbol;Acc:4428]	14	protein_coding	5.85504	5.25538	5.19135	5.26752	5.28245	5.71618	5.38459	5.2289	5.8317	6.32687	5.67716	5.56607	5.59825	5.28277	5.064	5.2135	5.71855	5.14957	5.45766	5.23703	5.31962	5.67276	5.04155	6.21538	6.25222	6.58199	5.57566	5.45585	4.57007	6.35165	5.49111	5.81005	5.19043	5.75992	5.34635	4.48107	5.63674	4.97716	5.83315	5.61375
ENSG00000066468	FGFR2	fibroblast growth factor receptor 2 [Source:HGNC Symbol;Acc:3689]	10	protein_coding	7.30251	5.87633	3.73988	5.62837	6.24882	1.96963	2.81762	6.02073	4.56683	2.86017	4.73301	4.27959	4.30698	6.03779	5.79063	5.59264	5.7359	4.69434	5.6482	5.30646	3.96663	3.97652	3.64437	4.71742	8.98364	3.58997	4.99267	4.66617	5.00289	4.90352	5.33362	8.0827	4.41052	2.76042	2.21119	3.24581	8.74207	5.96441	5.7189	5.37907
ENSG00000066557	LRRC40	leucine rich repeat containing 40 [Source:HGNC Symbol;Acc:26004]	1	protein_coding	4.13461	4.41413	3.73452	4.86998	4.21038	4.1415	4.35369	4.28813	3.99486	4.18901	4.308	4.65364	4.09089	3.77344	3.70988	3.29283	4.03916	3.5872	3.82691	3.63296	4.69184	4.8157	5.03905	4.31274	4.49316	4.28379	4.50025	3.80349	4.51933	4.4625	4.90197	4.68958	3.92277	3.92354	3.06244	4.13461	4.42794	4.84043	3.79301	4.354
ENSG00000066583	ISOC1	isochorismatase domain containing 1 [Source:HGNC Symbol;Acc:24254]	5	protein_coding	4.41638	4.72786	4.48858	3.15233	4.11493	4.84328	3.80976	4.19616	4.63154	5.16339	3.77671	5.08345	5.2934	4.72559	4.24861	5.16952	4.5649	4.39718	4.66197	4.55098	4.67097	4.65104	4.80354	5.14666	4.76206	3.63076	4.14474	3.78957	4.81287	4.46462	4.8545	5.28179	3.91653	3.72378	4.80354	4.66872	4.33245	3.8755	4.38487	2.68234
ENSG00000066629	EML1	echinoderm microtubule associated protein like 1 [Source:HGNC Symbol;Acc:3330]	14	protein_coding	1.56975	5.05597	3.77549	4.9753	4.09373	2.97467	4.10541	3.86334	3.21517	4.83186	2.85733	4.30559	4.84233	3.18594	3.15605	3.74963	3.64349	4.3238	4.52449	3.96546	1.01457	4.33717	2.06661	3.62099	2.95056	5.15543	2.9058	3.60149	3.14984	3.01201	1.89507	4.12441	2.73573	3.95817	5.13221	5.08938	3.42509	4.1788	3.70739	4.62311
ENSG00000066651	TRMT11	tRNA methyltransferase 11 homolog (S. cerevisiae) [Source:HGNC Symbol;Acc:21080]	6	protein_coding	3.35422	3.77217	3.62183	3.7045	4.21001	3.30911	3.51501	3.99183	4.25248	2.49367	3.58154	3.28304	3.08206	3.2994	3.85931	3.14984	3.14605	3.9878	3.59438	3.43247	4.60665	2.90205	3.77101	2.95324	3.23492	2.9582	4.03916	3.57004	4.75629	3.34106	4.44666	4.08942	4.00918	3.94226	3.9291	3.89886	3.56905	5.11379	4.18687	4.0966
ENSG00000066654	THUMPD1	THUMP domain containing 1 [Source:HGNC Symbol;Acc:23807]	16	protein_coding	7.45348	6.09323	6.66659	6.49799	6.34329	6.51451	6.28363	6.58614	6.09974	6.38499	5.88741	5.8615	6.59666	7.3712	7.15026	7.18735	7.48821	6.95089	7.25807	7.12171	6.10356	5.76676	6.03516	6.61678	6.15883	6.67851	6.05789	6.70069	6.16888	7.08634	5.9135	6.197	6.59819	6.62205	5.46442	6.41892	5.88002	6.01073	5.89945	5.41161
ENSG00000066697	MSANTD3	Myb/SANT-like DNA-binding domain containing 3 [Source:HGNC Symbol;Acc:23370]	9	protein_coding	3.21469	5.02424	4.0243	4.13229	4.39851	4.57172	3.91275	3.26163	4.33548	4.16607	4.07042	3.80231	3.32412	3.74395	3.57273	2.74381	3.02874	2.85119	3.25963	3.09369	4.13939	4.93678	4.85417	3.4689	4.17833	4.03382	4.69465	3.48561	5.31026	3.39687	4.81287	4.47873	3.5358	3.69029	5.01692	5.42429	3.71768	5.03276	3.6191	5.96524
ENSG00000066735	KIF26A	kinesin family member 26A [Source:HGNC Symbol;Acc:20226]	14	protein_coding	1.79982	0.932452	2.08033	5.16018	1.71242	2.39353	1.04611	2.98374	2.01231	2.16607	2.39424	2.14785	5.40631	3.22975	3.986	4.19967	3.24775	4.57141	4.51044	4.40055	0.796725	3.45781	3.08356	3.41519	2.38001	3.77629	1.53176	2.75811	1.83094	2.40416	0.575652	3.70209	2.90967	2.09731	4.00954	2.343	1.48584	4.78383	1.62892	2.92083
ENSG00000066739	ATG2B	autophagy related 2B [Source:HGNC Symbol;Acc:20187]	14	protein_coding	5.34067	4.72856	5.32932	6.13603	5.48011	5.14764	5.12063	5.58185	5.23308	5.37449	5.73099	5.70878	5.96009	6.05014	6.24843	6.17451	5.92765	6.20954	6.05681	6.01198	4.95457	5.11257	5.0589	5.9146	5.57803	5.55248	4.71518	5.78453	4.48236	5.86481	4.85577	5.22957	5.83642	5.99345	5.19229	4.55742	4.74892	5.43975	5.70625	5.30359
ENSG00000066777	ARFGEF1	ADP-ribosylation factor guanine nucleotide-exchange factor 1 (brefeldin A-inhibited) [Source:HGNC Symbol;Acc:15772]	8	protein_coding	8.62047	7.55922	7.32863	6.16489	6.99477	8.28339	6.70356	6.54973	6.57832	6.66659	6.7911	7.8069	6.21113	6.90077	6.48379	6.53963	6.72511	6.52142	6.23963	6.3074	6.86847	6.66277	5.8446	6.92895	5.76392	5.67753	6.67269	6.8174	5.7698	6.69573	7.01521	6.57232	7.16161	6.21113	6.83052	5.97689	6.1384	7.07045	6.73727	6.42588
ENSG00000066827	ZFAT	zinc finger and AT hook domain containing [Source:HGNC Symbol;Acc:19899]	8	protein_coding	5.83957	4.05727	3.92575	4.75821	3.92538	5.28412	4.11778	4.02624	4.80714	4.41382	4.19035	5.21984	3.48561	3.98416	4.01409	3.75884	4.01067	3.67001	3.98743	4.21503	4.354	4.40838	4.45969	3.97927	4.04957	3.18543	3.93681	3.92612	4.53602	4.44898	4.69497	3.98743	4.48858	4.58153	4.72918	4.78509	3.63553	5.20903	4.90629	4.70975
ENSG00000066855	MTFR1	mitochondrial fission regulator 1 [Source:HGNC Symbol;Acc:29510]	8	protein_coding	6.23881	5.82886	4.93114	3.9093	5.27653	6.30401	5.12158	4.33751	4.04849	5.47646	4.47657	5.89369	4.1872	4.04136	3.07162	3.43452	3.7172	3.13639	3.68702	3.07561	5.33232	4.29243	3.96739	4.18901	3.66482	3.0947	5.09292	3.46439	4.53509	5.16079	6.41892	4.37686	4.1745	3.82302	5.65646	4.1331	4.84456	4.60019	4.03522	4.25045
ENSG00000066923	STAG3	stromal antigen 3 [Source:HGNC Symbol;Acc:11356]	7	protein_coding	5.65611	0.728468	4.12478	3.50352	4.55356	2.55971	0.726683	4.30629	1.65493	0.961679	2.10104	0.0756536	0.501402	3.69885	0.611459	-0.0205419	-0.880802	0.366873	-0.202506	0.220031	0.371032	0.46433	0.217837	2.89622	4.98617	4.2751	0.591029	2.1363	0.0514021	-0.780004	0.18012	2.13478	1.29877	0.587383	0.495768	2.60259	1.15773	1.04339	1.97407	4.49411
ENSG00000066926	FECH	ferrochelatase [Source:HGNC Symbol;Acc:3647]	18	protein_coding	5.50672	3.70015	4.55964	4.42106	4.25855	4.72165	4.87097	5.03431	3.74876	5.12	4.71324	4.67674	5.04525	4.60634	4.44013	4.25759	4.78509	4.3791	4.67228	4.52288	4.71618	4.56941	3.69029	4.65812	4.24167	5.51196	4.14677	3.96854	5.17999	4.56976	4.72887	4.08333	4.23521	6.73209	4.71618	4.91141	5.01656	4.21038	4.07904	5.30584
ENSG00000066933	MYO9A	myosin IXA [Source:HGNC Symbol;Acc:7608]	15	protein_coding	5.95371	6.5382	6.72786	7.25988	6.60846	6.66539	6.49059	6.42346	6.69962	6.57289	6.58149	6.8527	6.54616	7.1891	7.44057	6.97211	6.97641	7.0373	7.07764	7.04177	6.23881	6.36871	6.46415	7.07282	6.38712	6.11536	6.35834	6.58468	5.36407	6.62606	6.24291	7.16403	6.78185	6.94293	5.38061	6.45199	6.46319	6.54362	6.32876	6.44276
ENSG00000067057	PFKP	phosphofructokinase, platelet [Source:HGNC Symbol;Acc:8878]	10	protein_coding	3.06505	7.05459	6.70637	5.41447	6.02036	6.87919	7.15462	4.11101	6.92695	9.30722	6.78645	4.82636	4.93244	6.28074	5.2491	4.83666	4.70749	5.22477	5.42887	5.46835	8.31512	8.0827	6.96673	6.70069	3.92835	7.16487	5.94494	4.92613	5.36762	4.01518	6.95647	5.38128	5.22763	4.85866	6.02747	6.2892	6.97065	7.92429	6.53313	7.54179
ENSG00000067064	IDI1	isopentenyl-diphosphate delta isomerase 1 [Source:HGNC Symbol;Acc:5387]	10	protein_coding	4.99267	5.0592	5.03783	4.08152	5.4388	6.28673	5.53353	5.28211	5.49493	5.23054	6.04292	5.34134	5.07183	4.84328	4.75212	4.59987	5.13935	4.78061	7.86212	5.04255	5.99273	5.08974	6.09018	6.46956	5.71096	6.63995	5.4871	5.39261	5.40733	7.81026	5.1387	4.59054	4.93502	6.67151	5.62608	6.02821	5.50528	6.37663	5.23343	5.37157
ENSG00000067066	SP100	SP100 nuclear antigen [Source:HGNC Symbol;Acc:11206]	2	protein_coding	4.98048	5.16208	5.4388	5.76562	6.05913	5.82381	5.56872	5.32053	6.34064	5.58343	6.25844	5.7113	5.89945	5.21476	5.48576	5.88172	5.19887	6.22413	6.09362	5.61858	4.7262	6.59666	4.48073	5.92442	6.34502	5.60159	5.28179	6.73494	4.78731	5.47281	5.71548	4.94104	6.39196	6.69518	3.93138	4.75728	4.88542	4.88926	7.12095	5.25635
ENSG00000067082	KLF6	Kruppel-like factor 6 [Source:HGNC Symbol;Acc:2235]	10	protein_coding	8.09812	8.50768	8.69424	7.55795	8.96139	7.42246	8.28862	8.61706	8.69424	10.0986	9.64694	8.72347	9.86003	9.59547	10.4947	9.58115	10.0237	10.1097	9.98305	10.4325	9.02003	8.91797	8.37275	8.66919	7.51098	8.30445	8.14111	8.4421	6.69911	7.49663	9.62462	7.33189	9.63946	8.93951	5.6992	8.8884	8.57681	8.60014	8.65509	7.49787
ENSG00000067113	PPAP2A	phosphatidic acid phosphatase type 2A [Source:HGNC Symbol;Acc:9228]	5	protein_coding	3.86669	3.4689	4.85827	6.3483	4.60277	4.61343	4.25515	4.81037	3.34464	4.52976	4.29345	4.43019	7.12256	5.42396	5.06305	5.44334	5.53254	5.54155	5.48877	6.15516	3.23191	4.0122	2.84056	4.98617	4.50615	4.2263	4.02892	5.28245	3.62393	5.17965	3.50951	3.92648	4.97781	4.50908	3.95887	5.16728	3.95923	5.57771	4.23416	4.93439
ENSG00000067141	NEO1	neogenin 1 [Source:HGNC Symbol;Acc:7754]	15	protein_coding	4.90811	5.56403	5.99672	6.8174	5.38679	7.09502	5.62641	5.9179	6.09933	6.10819	4.28098	5.50702	5.28051	6.77829	6.30657	6.61883	6.86144	6.0374	6.29755	6.32432	3.75555	6.6389	5.69125	5.57872	5.29899	6.23406	4.23728	5.70404	7.19434	6.16088	4.03416	5.64675	5.08435	6.34064	5.90481	6.3437	4.03699	6.29056	5.38256	6.5657
ENSG00000067167	TRAM1	translocation associated membrane protein 1 [Source:HGNC Symbol;Acc:20568]	8	protein_coding	8.76093	8.20919	7.71099	6.63333	8.07615	8.42439	7.29048	7.3245	7.50982	7.37462	7.8069	7.69066	6.97641	7.2128	7.0001	6.91326	7.19594	6.98651	7.35304	7.11297	6.5336	7.26375	6.59819	7.95685	7.228	7.42136	7.29159	7.68342	6.13118	7.94524	7.78039	7.19851	7.55159	7.09121	7.39025	6.43896	7.26472	7.00731	8.20517	8.00461
ENSG00000067177	PHKA1	phosphorylase kinase, alpha 1 (muscle) [Source:HGNC Symbol;Acc:8925]	X	protein_coding	4.87665	5.20507	4.63218	3.60698	3.92648	5.36538	4.72096	4.39955	4.14746	5.36337	4.09264	4.4148	4.21262	4.28477	4.02892	4.24483	4.18862	3.79584	4.10323	4.26367	4.64881	4.86117	5.51667	5.00781	4.6504	3.41748	5.06011	3.55862	4.03951	5.33069	5.39162	3.36676	4.07866	4.32086	5.30486	5.56231	5.54496	3.73024	3.96472	4.10184
ENSG00000067182	TNFRSF1A	tumor necrosis factor receptor superfamily, member 1A [Source:HGNC Symbol;Acc:11916]	12	protein_coding	5.38903	7.36709	7.29357	5.98088	7.07915	6.75299	6.66938	7.48539	6.79785	6.91624	6.83052	6.72786	7.64127	7.00302	7.14542	7.12456	7.23537	7.45573	7.36005	7.65973	6.06831	6.89619	6.78241	7.3733	6.3256	7.00661	6.64627	7.07687	7.25231	6.90341	6.06945	6.24882	6.91552	6.55378	5.38093	6.39279	6.10668	7.09586	6.65765	7.24276
ENSG00000067191	CACNB1	calcium channel, voltage-dependent, beta 1 subunit [Source:HGNC Symbol;Acc:1401]	17	protein_coding	2.5059	3.50576	2.4486	3.27432	3.51455	2.11688	2.249	2.81996	2.74263	2.49854	1.70415	3.11787	1.86333	2.66693	3.10367	1.63922	3.08725	3.06889	2.94153	3.43703	4.03768	2.05613	2.89733	3.39359	2.90749	2.83769	2.13014	2.85234	3.01519	2.72888	3.90699	2.03897	3.35222	3.99849	3.38297	3.97349	4.61924	3.94809	3.62862	3.14436
ENSG00000067208	EVI5	ecotropic viral integration site 5 [Source:HGNC Symbol;Acc:3501]	1	protein_coding	4.19383	4.7008	4.45094	4.94008	4.61119	5.5487	5.2983	4.71233	4.72918	4.57432	4.88509	4.9627	5.09578	4.64753	4.80621	4.46919	4.62086	4.51302	4.76815	4.78509	3.84741	4.95863	4.48372	4.82928	4.99147	5.26584	5.3417	4.79505	4.24936	4.92257	4.75497	5.12293	4.69249	4.70749	4.29865	4.00361	5.0459	5.01781	4.98801	5.34336
ENSG00000067221	STOML1	stomatin (EPB72)-like 1 [Source:HGNC Symbol;Acc:14560]	15	protein_coding	2.89277	3.86293	2.85234	2.75316	3.76868	4.2048	3.92466	3.52899	3.19157	4.19001	3.54086	3.88218	4.6089	3.2463	2.50323	3.36541	3.55617	3.15082	3.21821	3.6696	3.51501	3.85065	3.40829	3.22126	3.24427	3.22579	2.42104	3.16693	3.17671	3.52811	3.65754	3.5123	3.05924	3.40551	2.89679	2.32533	3.07668	2.8098	3.47429	3.56032
ENSG00000067225	PKM	pyruvate kinase, muscle [Source:HGNC Symbol;Acc:9021]	15	protein_coding	9.39009	10.3895	9.20791	9.99308	9.93417	10.3597	10.0876	9.40856	9.78189	10.2916	9.01084	9.53229	7.64947	9.0527	8.88006	8.84724	9.16608	8.89678	8.7346	8.32319	8.79167	10.332	9.91519	10.2276	9.69287	9.81598	9.16094	9.07654	10.3739	9.7652	9.20791	9.86905	9.19207	9.59547	9.78189	9.20791	10.4947	9.7652	9.63946	10.3458
ENSG00000067248	DHX29	DEAH (Asp-Glu-Ala-His) box polypeptide 29 [Source:HGNC Symbol;Acc:15815]	5	protein_coding	4.63982	4.9842	5.32571	5.11577	4.95498	5.67276	4.85961	5.38192	4.91389	5.7037	4.70521	5.47479	5.56017	5.31312	5.09639	5.21093	5.25431	5.09548	5.51844	5.12707	5.13349	5.11218	4.59279	5.59331	5.64885	4.87445	4.88509	4.96824	4.96209	5.30105	5.05211	5.4186	5.07336	4.74253	4.78988	7.01241	5.31218	4.81508	5.23211	4.8462
[truncated: 16,127 more rows]
