# Supplementary material for: Glycosylated extracellular matrix drives immune suppression by modulating macrophage-T cell crosstalk in triple-negative breast cancer
Source: Nat Commun. 2026 Jun 16;17:5008. doi: 10.1038/s41467-026-73467-5 (PMC13273098; doi:10.1038/s41467-026-73467-5)
Supplement: Supplementary file 7 — Supplementary Data 3 [file 41467_2026_73467_MOESM7_ESM.xlsx]

## Sheet: Sheet1
Glycomics dataset
Relative Intensity	Structure	Type	m/z	T1352	T1360	T1470	T1686	T1908	T2037	T2066	T3000	T1940	T219	T034	T036	T074	T258	T319	T353	T03359	T02429	T02667	T4580	T4617	T4683	T4702	T3591	T4563	T1740	T02290	T4091	S1352	S1360	S1470	S1560	A1908	A1686	A2066	A3000	A1940
	Hex2HexNAc2dHex1	N-glycan	1141.57	1.57638	6.82807	100			1.74325		11.311				3.43564												2.65465						1.1048
	Hex3HexNAc2	N-glycan	1171.58						1.58739						1.43859																		0.731347
	Hex3HexNAc2dHex1	N-glycan	1345.67	1.66537	2.4522			1.37515		2.28974			4.45243		2.33213	0.663701	1.01777	2.19099	1.53149	1.72581		1.8613			1.55826		1.56336						1.95026
	Hex3HexNAc3	N-glycan	1416.71	0.822092											1.51454										0.657464		1.18325
	Hex5HexNAc2	N-glycan	1579.78	51.4768	32.1856		41.6844	6.43133	20.5438	44.6282	29.7237	8.85447	66.6206	16.0247	20.5334	11.8318	31.2354	53.2451	22.3862	29.7581	20.3187	53.0125		40.2204	48.3645	5.56305	30.274	17.2007	18.8457	22.3355	20.527		48.4193					100	100	35.6522
	Hex3HexNAc3dHex1	N-glycan	1590.8	2.66827									4.42478	1.68968	3.42224	0.893306								2.18664	2.24848	0.775978	4.31611	1.10549
	Hex3HexNAc4	N-glycan	1661.84	0.930857					0.513738						0.755037	0.344407	0.3869								0.439869	0.461089	0.968671						1.21632
	Hex6HexNAc2	N-glycan	1783.88	67.9285	39.2896		34.968	14.0869	30.5443	61.4139	56.4065	21.9755	87.7765	19.7311	14.5468	21.2528	43.8429	22.5713	36.0883	33.2258	43.2271	22.4321		41.6322	96.3664	21.3038	39.3293	10.8113	26.8543	22.3662	28.1553		66.467	23.4801				99.1803	60.8401
	Hex4HexNAc3dHex1	N-glycan	1794.9											0.981105	2.26064									1.54959	1.15115		2.84471												2.34787
	Hex5HexNAc3	N-glycan	1824.91	3.4494	3.23333			0.695958	1.82406	2.18527	7.26868		3.04204	1.88954	5.65161	1.20184	0.704798		1.40743	1.35484				2.3416	2.14553	0.667266	2.85697	0.768222	0.658425				3.06803						4.03877
	Hex3HexNAc4dHex1	N-glycan	1835.92	8.54015	4.5935			1.07329	1.58162	2.28974			4.78429	1.47166	5.2942	1.37045	1.2297	1.94295	1.75821	0.870968		1.51661		3.23691	3.04165	1.417	6.65808	0.824433	1.35044				6.13346						10.21
	Hex4HexNAc4	N-glycan	1865.94	2.17529	2.77864								1.9635	0.890262	4.93678	0.631413	0.591439		0.740075	1				1.42906	0.561535		1.19551	1.0118					3.25216						2.61712
	Hex3HexNAc5	N-glycan	1906.96	1.43654	3.30328	44.5585	31.9829	2.28912	3.85881	3.01236		13.0041	4.92257		0.638878	1.20901	1.1607		1.36465	1.41935	19.5219	1.21329	100	1.94559	1.43893	2.95397	2.20097	1.4615	1.43107	2.6683		100	21.458	100	100	100	26.6174	96.7213	9.7469	100
	Hex7HexNAc2	N-glycan	1987.98	75.1706	42.0916		29.4243	31.5026	44.3691	54.684	60.2633	33.6937	80.0608	24.3096	7.49229	24.0905	45.8784	38.1149	42.7661	47.4677	49.4024	38.1911	22.4953	51.2052	69.2209	45.8127	62.7552	18.2874	45.6195	21.0934	32.5936		50.4059	13.6268				70.2186	38.6537
	Hex5HexNAc3dHex1	N-glycan	1999		2.66594									1.05378	1.08118							1.02027					4.65943			1.61785			3.46482
	Hex6HexNAc3	N-glycan	2029.01	4.97351	4.68289				2.23678	4.28348			4.17588	1.83503	2.8057	1.2987	0.670297		1.45021	1.58065		0.854819		2.94422	4.00328	0.907183	3.56814	0.918119	0.9742	2.87533	11.0957		5.71073					30.8743	5.78352
	Hex4HexNAc4dHex1	N-glycan	2040.02	5.19669	6.94077			0.880429	2.25121	4.14418	7.28722		3.59513	2.23474	9.38659	1.48167	0.988196		2.75068	1.29032		1.06163		3.06474	2.09172	0.88469	5.23573	2.13603	0.913733	2.16224			10.436						9.19763
	Hex5HexNAc4	N-glycan	2070.04	8.56416	9.6961			0.955895	2.65816	3.89169	11.0699		4.59071	2.90698	24.389	2.37856	1.13852		1.70688	3.54839				3.54683	1.60271	0.865947	2.25615	1.85497	0.987638	3.61908			6.4343						5.6112
	Hex3HexNAc5dHex1	N-glycan	2081.05	7.19401	3.43152			1.10683	1.35939	2.01985	8.9746	4.82174	5.53097	1.39898	1.84068	2.16689	2.15875	1.77759	1.34754	1.3871		2.57824		2.4449	3.02527	3.1339	11.3972	1.42402	1.72669	1.15013			33.0818						13.1502	15.1304
	Hex4HexNAc5	N-glycan	2111.06	2.82506	3.99503			1.88663				9.7896	5.9458	1.30814	1.29563	2.49695	1.18041				16.5339									2.23892		79.8365	9.45045	81.1321	63.5762	52.8517	21.6266	64.7541	8.02369	68.1739
	Hex3HexNAc6	N-glycan	2152.09					1.05652		1.02734							3.62256		3.47365										0.712174
	Hex4HexNAc3NeuAc1dHex1	N-glycan	2156.07	4.31104	4.84999			1.0062	1.31609	2.40293	6.19321		3.45686	1.52616	1.95237	1.41709	1.78664	1.86027	3.01164			2.10947					11.9551		1.13545	1.7942			8.28082						9.08993
	Hex8HexNAc2	N-glycan	2192.08	100	66.0734	15.1951	54.4776	100	100	100	96.8848	100	100	46.5661	8.38583	42.5343	100	100	100	100	100	100	19.2817	100	100	100	100	37.0245	100	28.6536	50.0693		55.5746	10.2725	31.1258			73.7705	45.8589	11.6522
	Hex6HexNAc3dHex1	N-glycan	2203.1	2.20637	2.32395																						4.59199			1.64852			2.9617
	Hex4HexNAc4dHex2	N-glycan	2214.11	2.03969
	Hex4HexNAc4NeuAc1	N-glycan	2227.11	2.39141																							2.69144	2.00487	0.980919	1.49517			2.79572
	Hex5HexNAc4dHex1	N-glycan	2244.12	28.9851	36.6081		26.226	3.34563	13.9056	20.8863	39.4029	5.69842	29.3418	21.0938	100	13.4857	2.99416	2.7284	10.9172	13.371	12.5498	2.8402		18.3196	11.3219	4.2885	10.5082	10.3804	3.64149	28.1552	22.3301		22.2568					34.9727	18.8153	13.5652
	Hex6HexNAc4	N-glycan	2274.14	1.96624	2.42111									1.48983	2.16236	1.1552										0.738491				1.30348			2.18367
	Hex4HexNAc5dHex1	N-glycan	2285.15	9.19556	7.58589	7.49487		1.55123	2.45324	8.66272	9.64213	8.03624	14.823	2.76163	6.90256	11.0497	2.96705	1.1575	2.68224	1.53226	9.36255	1.39253		2.27273	6.0131	3.64372	10.6554	2.75436	1.88793	2.72198	19.5562		35.1902	11.74				47.2678	25.0512	38.4348
	Hex5HexNAc5	N-glycan	2315.16	1.99449									3.18031	1.03561	1.01416	2.01622												1.23665		1.64085		44.4142	4.09502	50.7338	41.0596	41.4449	14.6026	38.2514	4.7496	45.2174
	Hex3HexNAc6dHex1	N-glycan	2326.18	1.41959											0.580798										0.493683	0.393612	1.6308
	Hex6HexNAc3NeuAc1	N-glycan	2390.18	5.14726	6.61433		7.03625	1.58477	3.65966	9.3331	11.348	4.93863	4.95022	3.27035	1.14819	2.70862	1.66342	1.61224	2.96886	2		2.02675				2.12925	8.92649	3.279	2.96291	3.33538			10.6279						12.1809
	Hex9HexNAc2	N-glycan	2396.18	43.6825	27.5843	8.62423	31.5565	88.6634	82.4954	71.8005	47.5987	89.9474	39.8783	32.7217	3.71711	31.1545	57.6825	55.6428	73.1733	89.7742	65.3386	50.9996	14.9338	46.2982	42.5059	72.046	51.4867	21.6226	52.9159	10.7652	37.1706		35.5092	8.38574				73.7705	37.8783	12.1739
	Hex4HexNAc4NeuAc1dHex1	N-glycan	2401.2	5.23907				3.16116	4.67559	5.23246		7.01344															13.4265												6.20355	10.4348
	Hex5HexNAc4dHex2	N-glycan	2418.21	3.68388									3.20796											1.32576						4.38583									3.62951
	Hex5HexNAc4NeuAc1	N-glycan	2431.21	49.1913	26.4029		11.3006	3.30371	16.4512	10.2037	25.7556	6.25365	11.4215	10.0109	15.8379	12.0076		3.18313	6.09172	6.75806		3.73639				4.9895	18.2576	38.5423	18.4292	19.8896	13.4535		31.9718						21.6155
	Hex6HexNAc4dHex1	N-glycan	2448.22																	1.09677																			3.06947
	Hex4HexNAc5dHex2	N-glycan	2459.24														1.34799					0.68937
	Hex4HexNAc5NeuAc1	N-glycan	2472.24			8.82957		0.98105	0.992842	1.00122		3.27294			0.312737	0.688814	0.367185									0.697256	0.944148			0.575065		13.3515	3.15102	12.1593			6.28466		2.4448	10.6087
	Hex7HexNAc4	N-glycan	2478.23																																				27.3021
	Hex5HexNAc5dHex1	N-glycan	2489.25	9.59531	10.1391			1.11521	2.18772	8.70625	10.8845	5.2893	17.4226	2.8343	7.78716	13.0982	1.84332	1.48822	2.32717		6.97211	1.44768		2.03168	5.5241	2.75903	7.79842	2.96046	1.7334	3.36605	16.2275		28.717	7.75681				36.612		28.8696
	Hex6HexNAc5	N-glycan	2519.26	2.79116	3.64527	14.5791		0.98105			6.67532	4.35418	2.15708	1.09012	1.14819	1.14444				0.919355							6.57838			1.31882		37.8747	2.51822	36.8973	32.4503	31.9392	9.98152	24.3169	2.40172
	Hex5HexNAc3NeuAc1dHex2	N-glycan	2534.26																								73.8397
	Hex6HexNAc3NeuAc1dHex1	N-glycan	2564.27	3.17254	2.19182				0.802355	2.82083	5.59985			1.34448				0.744109		0.919355		0.992693				0.839706	6.57838	1.98613	0.839828	1.19614			2.35483						2.02477
	Hex5HexNAc4dHex3	N-glycan	2592.3											2.4891	2.5287	2.47184														3.33538
	Hex5HexNAc4NeuAc1dHex1	N-glycan	2605.3	42.3081	100	16.3244	100	13.8856	51.5989	78.9048	100	34.2198	99.5022	100	91.6544	100	14.2931	6.36627	59.4328	20.7258	42.6295	7.19702	24.5747	1.49793	1.0131	28.655	73.8397	54.169	19.8603	100	100		100	11.5304	23.8411	30.4182		89.3443	70.2746	57.7391
	Hex6HexNAc4NeuAc1	N-glycan	2635.31	2.25722				0.746269	1.86735	1.73254																	2.88149
	Hex4HexNAc5NeuAc1dHex1	N-glycan	2646.32	2.06371	3.35769			1.22422	1.2093	2.89918	8.19581	6.955	2.04646	2.85247	0.915874	2.24941	1.4022		1.43737							2.94647	4.64717	0.97433	1.19592	1.66386	7.21221		9.95358						6.27894	17.7391
	Hex5HexNAc5dHex2	N-glycan	2663.34										1.27212				0.929052											2.3234	0.712174
	Hex5HexNAc5NeuAc1	N-glycan	2676.34	1.14415	2.32007	6.05749		0.687573	0.94955			2.95149	1.13385	0.944768	0.335076	1.07627	0.450972		0.534737							0.764732	1.32426	0.805696	0.577802	0.682411		11.9891	4.56184	9.64361	19.8675				3.01562
	Hex6HexNAc5dHex1	N-glycan	2693.35	8.62773	6.81642		4.371	0.880429	2.21081	3.44768	12.7944	3.79895	3.04204	2.87064	7.8095	1.37404	0.581582	1.3642	1.60849	2.64516		1.32359		2.06612	4.19045	1.45074	8.60769	2.37961	1.31685	3.92578			6.08159						4.70652
	Hex6HexNAc3NeuAc1dHex2	N-glycan	2738.36																											0.65174
	Hex5HexNAc4NeuAc1dHex2	N-glycan	2779.39	5.44954	6.92134			1.1236		1.34947	12.0527	2.8346	2.62721	1.72602	1.14373	1.70768	2.34111	1.61224	1.94644	1.30645		2.57824				1.432	10.3856		4.06477	2.53795			7.93848						8.5622
	Hex5HexNAc4NeuAc2	N-glycan	2792.38	9.60237	36.8607		13.4328	3.87389	25.6061	15.2795	29.8906	11.2215	8.62832	14.6621	4.63745	18.8993	20.0276	8.63993	8.59001	6.5	8.56574	12.905	10.0189			8.87689	39.1944	100	44.054	24.4441	13.3148		87.1651		17.8808			16.6667	74.6042	11.1304
	Hex5HexNAc5dHex3	N-glycan	2837.43	0.762766														0.496073															2.63492
	Hex7HexNAc4NeuAc1	N-glycan	2839.41	0.882831														0.785449
	Hex5HexNAc5NeuAc1dHex1	N-glycan	2850.42	3.94661	6.42779			1.30807	2.82556	5.28469	9.47525	7.04267	5.44801	2.07122	1.67091	8.90077	2.2105	0.785449	2.25017	0.451613		1.07542				3.96986	11.9919	3.65374	2.49933	1.36482	8.73786		17.3111					15.5738	16.8336	21.0435
	Hex6HexNAc5dHex2	N-glycan	2867.44	1.17946							10.013																			0.598068	7.4896								2.11093
	Hex6HexNAc5NeuAc1	N-glycan	2880.44	3.60477	4.24374	4.82546	4.05117	0.763039	1.54121	1.68901	6.99054	2.39626	1.24447	1.23547	0.598669	1.05116	0.67769		0.821355	0.596774		0.716945				0.715999	2.81405	1.51771	0.967482	1.01211		9.53679	4.63705	8.80503					3.25256	6.26087
	Hex6HexNAc6dHex1	N-glycan	2938.48	1.91539	2.28509					1.29723			3.62279		0.786311	1.22336		0.66143						0.619835	0.706598	0.596041	1.74116			0.843429			3.84087						4.73883	6.95652
	Hex5HexNAc4NeuAc1dHex3	N-glycan	2953.48	1.18652							5.61839		4.06527	1.01744	0.527186	1.98393		0.992145		0.629032		1.59934			0.112307	1.04214				1.4875									2.30479
	Hex5HexNAc4NeuAc2dHex1	N-glycan	2966.47	2.58069	42.1149	9.24025	33.1557	8.67852	27.205	32.5353	29.2231	38.7785	69.3584	48.492	14.8282	70.1227	12.4375	7.0277	24.1573	11.1774	32.6693	9.48573	17.0132			16.5804	54.0494	44.1447	16.5144	23.9534	55.6172		39.0467		17.2185	13.6882		32.5137	32.8918	32
	Hex7HexNAc6	N-glycan	2968.49	3.66975	48.9702	9.54825	44.7761	10.7832	32.9225	41.5636	38.7539	46.8732	55.8075	63.899	19.2065	87.4973	15.6855	10.0868	31.2414	14.1935		13.4565	19.0926		0.208236	22.2147	67.7947	58.4973	20.9755		70.7351		44.5862		22.5166				34.0872	39.1304
	Hex5HexNAc5NeuAc1dHex2	N-glycan	3024.51	0.694964												0.631413	0.966017									0.626031	44.706		0.772642										1.48627
	Hex6HexNAc5dHex3	N-glycan	3041.53	1.15545									1.32743	0.926599				0.66143												0.858764
	Hex6HexNAc5NeuAc1dHex1	N-glycan	3054.52	12.176	14.8725		9.48827	2.92638	8.8057	12.9897	23.9384	10.8416	8.2135	13.1722	8.39476	9.1232	2.24254	1.52956	7.77293	3.43548	8.96414	2.64718		0.464876	0.287787	5.99415		7.06389	4.7971	8.5033	16.9209		16.0092					26.2295	11.1147	21.913
	Hex6HexNAc6dHex2	N-glycan	3112.57														0.367185
	Hex5HexNAc4NeuAc2dHex2	N-glycan	3140.56	0.809379	1.82652			0.218011	0.242438	0.531081	4.28333			0.817587		0.222429	0.273541	0.578752	0.201061	0.274194		0.579071				0.491078	0.674391	0.580851	0.369524				0.822117						1.29241
	Hex7HexNAc6dHex1	N-glycan	3142.58	4.56671	3.71522			0.545028	0.773493	1.23629	9.99444		1.21681	1.28997	1.175	0.552486	0.497794	0.70277	0.752909	0.903226		0.896181		1.06749	1.0716	1.10211	1.87603	1.33034	1.29669	1.24214			2.53897						1.97092
	Hex5HexNAc5NeuAc1dHex3	N-glycan	3198.6	0.326294																						0.277403
	Hex7HexNAc4NeuAc2	N-glycan	3200.58	0.449184
	Hex5HexNAc5NeuAc2dHex1	N-glycan	3211.6	0.399746	2.49883			0.905584	1.19199	1.13181	3.70851	3.76973	1.60398	0.817587	0.214448	2.09873	0.911802	0.620091	0.983915	0.274194		0.510134				2.48913	3.421	1.27412	1.10185	0.460052			4.40105						3.54335
	Hex6HexNAc5dHex4	N-glycan	3215.62	0.973233	1.60501			0.578568	0.727315	0.705206	4.15353	1.63647						0.950806				0.937543					2.12127						2.54156						2.00323
	Hex6HexNAc5NeuAc1dHex2	N-glycan	3228.61	1.17946	2.08301			0.486332		0.722619	8.30706			0.635901	0.285931	0.645763	0.549545	0.950806	0.504791	0.322581		1.43389				1.12086	2.94893	1.51771	0.725611	0.682411									2.87561
	Hex6HexNAc5NeuAc2	N-glycan	3241.61	0.522636	2.71258			0.427637	0.805241	0.888038		1.46113	0.857301	0.853924	0.236787	0.692401	0.687548	0.909467	0.543292	0.387097		0.703157				0.637277	2.66691	2.45456	1.31013	0.820426			3.81753						2.30479
	Hex6HexNAc6dHex3	N-glycan	3286.66														0.394293																0.956975
	Hex6HexNAc6NeuAc1dHex1	N-glycan	3299.65	1.49869	1.58557			0.301861	0.36943	1.15793	3.93102	2.77615	1.85288	0.52689	0.294867	1.28435	0.648118		0.556126							0.51357	1.33652	0.674536	0.524053	0.383377			2.47932							9.73913
	Hex5HexNAc4NeuAc2dHex3	N-glycan	3314.65	0.399746	1.08814				0.21069	0.365663	3.65288				0.0938212	0.215254	0.192218		0.273785			0.344685				0.311141	0.655999		0.228433				0.752094
	Hex7HexNAc6dHex2	N-glycan	3316.67	0.793841	1.17364				0.320365	0.888038	5.52568				0.263593	0.340819	0.229183		0.359343			0.454984				0.59979	0.876709		0.295619	0.398712			1.03737
	Hex7HexNAc6NeuAc1	N-glycan	3329.66	1.16957	1.85372			0.335402	0.606095	0.722619	4.2277	1.13968	0.608407	0.853925	0.183175	0.469972			0.376454							0.382366	0.974802	0.580851	0.49046	0.368042			1.7739
	Hex5HexNAc5NeuAc2dHex2	N-glycan	3385.69													0.233192
	Hex6HexNAc5NeuAc1dHex3	N-glycan	3402.7	1.10036				0.327017			6.08196		1.02323	0.744913	0.201045	0.444859	0.47808	1.5709				1.33738				0.491078	2.58721	0.955593	0.544209	0.705413									1.52935
	Hex6HexNAc5NeuAc2dHex1	N-glycan	3415.7	1.19076	8.96938		5.65032	2.0711	5.44332	5.98119	10.8103	10.0234	7.77102	7.83067	1.65304	7.03882	1.831	1.86027	4.3335	1.80645	6.1753	2.24735				3.63248	21.5744	7.04516	3.04354	3.65741	10.2635		8.93177					9.83607	5.97738	11.6522
	Hex8HexNAc7	N-glycan	3417.71	1.88714	12.5952		8.742	4.0332	9.61383	10.0818	14.9824	18.3811	7.21792	16.3699	3.06483	13.1987	3.8271	3.55519	8.00394	4.04839	10.9562	4.0535				7.48613	41.7694	11.8606	5.65708	6.94679	16.9209		13.4366						9.4238	15.3043
	Hex6HexNAc6NeuAc1dHex2	N-glycan	3473.74	0.423759													0.436186												0.255308				0.744314
	Hex7HexNAc6dHex3	N-glycan	3490.76	0.566424
	Hex7HexNAc6NeuAc1dHex1	N-glycan	3503.75	5.81962	4.53521		3.3049	1.41707	2.32914	2.91659	10.2169	3.85739	3.04204	2.1439	1.3269	2.12743	0.699869	0.785449	2.34428	1.09677	3.38645	0.620433			0.131025	2.07302	4.73913	2.37961	1.78044	3.18969	5.40915		5.15055					7.65027	3.55412	4.69565
	Hex5HexNAc5NeuAc2dHex3	N-glycan	3559.78																0.295175
	Hex7HexNAc7dHex2	N-glycan	3561.79														0.251362		0.539014
	Hex6HexNAc5NeuAc1dHex4	N-glycan	3576.79	0.314994														0.785449				1.02027
	Hex6HexNAc5NeuAc2dHex2	N-glycan	3589.79	0.387033	1.46899			0.234781	0.326137	0.374369	4.41313	0.964348	0.553097	0.617733	0.0848859	0.247542	0.487937	1.24018		0.290323		1.66828				0.318638	1.57562	1.3116	0.712174	0.55973			1.33562						1.22779
	Hex8HexNAc7dHex1	N-glycan	3591.8	1.39134	2.43665			0.561798	0.666705	0.609438	8.28852	1.60725	1.05088	0.78125	0.183175	0.459209	0.776264	2.60438				3.04702		0.378788	0.0959289	0.678512	2.14579	1.59266	1.1556	0.881767			2.24072						2.06785
	Hex6HexNAc5NeuAc3	N-glycan	3602.78		3.93673			0.259936	1.06211	1.08828	3.83831	1.22735	0.96792	1.68968	0.11616	0.319294	1.77185	2.02563	0.367899	0.435484		2.57824				0.581047	6.25958	9.49972	4.67616	2.88299			6.12568						3.51104
	Hex6HexNAc6NeuAc1dHex3	N-glycan	3647.83	0.278268													0.271076	0.496073
	Hex6HexNAc6NeuAc2dHex1	N-glycan	3660.82	0.227417	0.804446			0.184471	0.219349	0.322131		1.2858	0.884956			0.344407	0.428793	0.785449	0.218172							0.22867	0.668261		0.248589				0.822117						0.872375
	Hex7HexNAc6dHex4	N-glycan	3664.84	0.529698	0.76947				0.213577	0.400488		1.16891						0.744109				0.510134					0.7357	0.412217					0.863612						1.14163
	Hex7HexNAc6NeuAc1dHex2	N-glycan	3677.84		1.25136				0.216463	0.356956	4.33896	0.964348	0.497788	0.399709	0.11616	0.258305	0.303112	2.23233	0.337953			0.330898				0.277403	1.11581	0.655799	0.34265	0.406379			1.13592						0.915455
	Hex7HexNAc6NeuAc2	N-glycan	3690.83	0.728865	1.10757				0.239552	0.400488	3.18932			0.290698		0.240367	0.234111		0.235284							0.202429	0.705046	0.39348	0.382962	0.490722			1.07109						0.850835
	Hex7HexNAc7NeuAc1dHex1	N-glycan	3748.88	0.354545	0.761697					0.322131		1.08124			0.0804182	0.351582	0.345006		0.218172							0.187434	0.51499		0.262026				0.829897							5.21739
	Hex6HexNAc5NeuAc2dHex3	N-glycan	3763.88	0.426584	0.858853					0.296013	3.30057			0.436047	0.107224		0.280934	0.578752				0.868606				0.213675	0.686653	0.712011		0.406379
	Hex8HexNAc7dHex2	N-glycan	3765.89	0.672364	0.952122					0.426606	5.50714			0.508721			0.298184					1.07542				0.363623	0.80927	0.674536
	Hex6HexNAc5NeuAc3dHex1	N-glycan	3776.87		3.10508		2.45203	0.603723	1.90776	1.19276	5.80382	3.03916	1.46571	1.8532	0.209981	1.90859	2.13411		0.851301	1.12903		2.92293				1.14335	9.27595	7.12011	2.08949	2.3156	4.43828		4.96123						2.90792
	Hex6HexNAc6NeuAc2dHex2	N-glycan	3834.91														0.207004
	Hex8HexNAc8dHex1	N-glycan	3836.93														0.345006
	Hex7HexNAc6NeuAc1dHex3	N-glycan	3851.93	0.494385	0.928805				0.152967		3.93102			0.417878	0.0848859	0.200904	0.295719					0.579071				0.206178	0.987064	0.449691	0.235152	0.306701			0.81693
	Hex7HexNAc6NeuAc2dHex1	N-glycan	3864.92	0.594675	3.31494		1.91898	0.796579	1.31609	1.98503	6.74949	4.52952	1.05088	1.94404	0.352946	1.54983	0.818157		1.71971	0.629032	1.99203	0.661795				0.933423	3.35357	1.92992	0.77936	1.54117	4.43828		3.1562					7.37705	1.7986	7.13043
	Hex7HexNAc7dHex4	N-glycan	3909.97																														0.474597
	Hex6HexNAc5NeuAc2dHex4	N-glycan	3937.97		0.683973																					0.116209
	Hex8HexNAc7dHex3	N-glycan	3939.98	0.326294	0.687859																					0.22867
	Hex6HexNAc5NeuAc3dHex2	N-glycan	3950.96		0.563501				0.213577		2.79993			0.25436			0.142931	0.413394		0.451613		0.399835				0.194932	0.380112	0.39348	0.214996
	Hex8HexNAc7NeuAc1dHex1	N-glycan	3952.98	1.21195	2.05192			0.486332	0.992842	1.08828	5.43297	2.1917	0.525442	1.63517	0.147433	0.423334	0.354863	0.868127	0.782854	0.774194		0.648008				0.74224	1.56949	1.76129	0.712174	0.651741	3.19001		1.47566						1.51858	2.95652
	Hex7HexNAc6NeuAc1dHex4	N-glycan	4026.02	0.553711							2.78138	0.789012						0.70277				0.441197
	Hex7HexNAc6NeuAc2dHex2	N-glycan	4039.01	0.221767	0.924918			0.184471	0.147195	0.217656	3.07806			0.490552	0.0625475	0.13274	0.184825	0.413394	0.196783			0.413622				0.153696	0.429158	0.430954	0.268745	0.207023			0.679478						0.603123
	Hex9HexNAc8dHex1	N-glycan	4041.03	0.693552	1.27468			0.234781	0.268414		3.94956			0.363372		0.233192	0.441115	0.826788	0.436345			0.68937			0.0538138	0.273654	0.919625	0.618325	0.470304	0.345039			1.11517						0.990845
	Hex7HexNAc6NeuAc3	N-glycan	4052.01		0.781129						3.02244																0.324934		0.141091	0.184021			0.583521
	Hex6HexNAc5NeuAc3dHex3	N-glycan	4125.05		0.567387				0.0721542		2.02114						0.0788585									0.104963							0.246376						0.872375
	Hex8HexNAc7NeuAc1dHex2	N-glycan	4127.07	0.22318	0.645111				0.13565		2.79993					0.121977	0.10843									0.176188	0.465943						0.407168
	Hex7HexNAc6NeuAc1dHex5	N-glycan	4200.11															0.372055
	Hex7HexNAc6NeuAc2dHex3	N-glycan	4213.1	0.218942	0.551842						3.11515						0.10843					0.37226					0.318803
	Hex7HexNAc6NeuAc3dHex1	N-glycan	4226.1		1.00264			0.167701	0.213577	0.34825	3.59726		0.525442	0.853924		0.279831	0.258755		0.239562	0.241935		0.303323				0.206178	0.950279	0.505902	0.235152	0.490722			0.933634
	Hex8HexNAc7NeuAc1dHex3	N-glycan	4301.15																								0.423027
	Hex8HexNAc7NeuAc2dHex1	N-glycan	4314.15	0.22883	1.29799			0.259936	0.337682	0.818388		1.63647	0.359513	1.45349	0.178707	0.36952	0.135538		0.393566							0.292398	0.51499	0.618325	0.221715	0.291366			1.11777						0.861605
	Hex7HexNAc6NeuAc2dHex4	N-glycan	4387.19	0.187866							2.29928											0.275748
	Hex7HexNAc6NeuAc3dHex2	N-glycan	4400.19		0.555728											0.168616	0.118288	0.289376				0.234386											0.293057
	Hex9HexNAc8NeuAc1dHex1	N-glycan	4402.2	0.505685	1.07259			0.243166	0.329023	0.426606	3.02244	0.964348		0.454215	0.129563		0.23904	0.620091	0.316564			0.523921				0.277403	0.539513	0.543376	0.248589	0.230026			0.889546						0.463113
	Hex7HexNAc6NeuAc4	N-glycan	4413.18		0.489663																												0.409762						0.538503
	Hex8HexNAc7NeuAc1dHex4	N-glycan	4475.24																								0.343327
	Hex8HexNAc7NeuAc2dHex2	N-glycan	4488.24		0.579046														0.102669			0.179236				0.108712	0.232972	0.374742		0.145683			0.233409
	Hex10HexNAc9dHex1	N-glycan	4490.25	0.235892	0.680087				0.129878										0.158282			0.275748					0.496597			0.153351			0.404575
	Hex7HexNAc6NeuAc3dHex3	N-glycan	4574.28		0.443028																	0.261961											0.215255
	Hex9HexNAc8NeuAc1dHex2	N-glycan	4576.29											0.290698													0.282018						0.316398
	Hex7HexNAc6NeuAc4dHex1	N-glycan	4587.27		0.808332				0.0692681		2.39199			0.345204		0.0968645	0.152788		0.14117			0.248173				0.123707	0.613083		0.134372	0.207023			0.593895						0.527733
	Hex8HexNAc7NeuAc1dHex5	N-glycan	4649.33											0.436047
	Hex8HexNAc7NeuAc2dHex3	N-glycan	4662.33																														0.236002
	Hex10HexNAc9dHex2	N-glycan	4664.34																														0.414948
	Hex8HexNAc7NeuAc3dHex1	N-glycan	4675.32		0.341987				0.0779266					0.236192		0.0681639										0.116209	0.410766			0.184021			0.339739
	Hex9HexNAc8NeuAc1dHex3	N-glycan	4750.38		0.411938																						0.202317
	Hex7HexNAc6NeuAc4dHex2	N-glycan	4761.36													0.154266
	Hex9HexNAc8NeuAc2dHex1	N-glycan	4763.38	0.158203	0.781129			0.134161	0.129878	0.2786		0.87668		0.78125			0.0813229		0.175394							0.176188	0.263626	0.243583	0.208277	0.214691			0.435696						0.506193
	Hex10HexNAc9NeuAc1dHex1	N-glycan	4851.43	0.217529	0.361418			0.10062	0.118333								0.0468222		0.128337							0.168691							0.243782
	Hex8HexNAc7NeuAc4dHex1	N-glycan	5036.5																														0.308618
	Hex8HexNAc7NeuAc4dHex2	N-glycan	5210.59		0.217628
	Hex10HexNAc9NeuAc2dHex1	N-glycan	5212.6		0.408052														0.0898357							0.127455							0.389014
