# Supplementary material for: Glycosylated extracellular matrix drives immune suppression by modulating macrophage-T cell crosstalk in triple-negative breast cancer
Source: Nat Commun. 2026 Jun 16;17:5008. doi: 10.1038/s41467-026-73467-5 (PMC13273098; doi:10.1038/s41467-026-73467-5)
Supplement: Supplementary file 10 — Supplementary Data 6 [file 41467_2026_73467_MOESM10_ESM.xlsx]

## Sheet: Sheet1
Patient Characteristics
BCN No.	Age at Diagnosis	Date of Surgery	Invasive Type	Invasive Grade	Invasive Size (mm)	DCIS	ER Status	ER Score	PR Status	PR Score	HER2 Status	HER2 Score	Total Size (mm)	LN Status	Total LN	Positive LN	TNM	Neoadjuvant Treatment	Adjuvant Treatment	Follow Up
1352	52	2011-11-10	IDC	3	35	Absent	Negative	0	Negative	0	Negative	0	35	Negative	3	0	pT2 pN0		FEC, radiotherapy	In remission after 8 years
1360	51	2011-11-17	IDC	3	21	Present High	Negative	2	Negative	0	Negative	0	21	Negative	7	0	pT2 N0 M0		FEC	Recurrence at 3 years, mets at >3 years, deceased at >4 years (metastatic breast cancer)
1470	44	2012-04-19	IDC	3	18	Present High	Negative	0	Negative	0	Negative	1+	18	Positive	12	4	ypT1c ypN2	EC-D	Radiotherapy	Mets at <2 years, deceased at 2 years (metastatic breast cancer)
1560	46	2012-05-29	Metaplastic	3	35	Absent	Negative	0	Negative	2	Negative	0	35	Negative	3	0	pT2 pN0		FEC-T, radiotherapy	In remission after 7 years
1686	56	2013-02-21	IDC	3	19	Absent	Negative	0	Negative	2	Negative	0	19	Negative	1	0	pT1c N0		FEC, radiotherapy	In remission after 6 years
1908	42	2014-02-07	IDC	3	23	Absent	Negative	2	Negative	No score*	Negative	1+	23	Positive	18	5	pT2 pN2a		FEC-T, radiotherapy	In remission after 6 years
2037	43	2014-07-17	IDC	3	35, 19	Present High	Negative	0	Negative	No score*	Negative	0	42, 19	Positive	6	1	pT2(m) pN1		FEC-T, radiotherapy	Separate endometrial cancer at <5 years, in remission for breast cancer after 5 years
2066	48	2014-08-14	IDC	3	18	Present High	Negative	0	Not done		Negative	1+	18	Positive	6	1	ypT1c N0	FEC-T	Radiotherapy	Mets at <2 years, deceased at <2 years (metastatic breast cancer)
2940	65	2017-08-08	IDC	3	24	Absent	Negative	0	Negative	0	Negative	0	24	Negative	9	0	pT2 N0		AC Carbotaxol, radiotherapy	In remission after 2 years
3000	87	2017-10-24	IDC	2	30, 1	Present High	Negative	0	Negative	0	Negative	0	30	Positive	16	3	pT2(m) pN1a		Radiotherapy	Recurrence at 2 years
1979	55	2014-05-12	IDC	3	19	Present High	Negative	0	Negative	No score*	Negative	0	25	Positive	14	4	pT1c N2		FEC-T, radiotherapy	In remission at <6 years
1940	38	2014-03-31	IDC	3	18, 14, 12, 6	Present High	Negative	2	Not done		Negative	1+	18, 14, 12, 6	Positive	21	14	pT1c(m) pN3a	FEC-T	Radiotherapy	In remission after 5 years
219	51	2010-12-15	IDC	3	38	Absent	Negative	Not stated	Negative	Not stated	Negative	Not stated	38	Negative	2	0	T2 N0 MX		EC-D
34	79	2011-02-16	IDC	3	17	Present Inter/High	Negative	Not stated	Negative	Not stated	Negative	Not stated	100	Positive	27	26	T1 N3 MX		EC90-Paclitaxel + Capecitabine, Radiotherapy
36	58	2011-02-17	IDC	3	1.8	Present High	Negative	Not stated	Negative	Not stated	Negative	Not stated	30	Negative	1	0	T1 N0 MX		EC90, Radiotherapy
74	50	2011-03-31	IDC	3	28, 6	Present High	Negative	Not stated	Negative	Not stated	Negative	Not stated	65	Negative	Not stated	0	T2 N0 MX		EC90
258	61	Not stated	IDC	3	70	Not stated	Negative	Not stated	Negative	Not stated	Negative	Not stated	70	Positive	18	8	Not stated	EC-D	Radiotherapy
319	69	2011-11-03	IDC	2	16	Present High	Negative	Not stated	Negative	Not stated	Negative	Not stated	20	Positive	20	9	T1c N2 MX		Paclitaxel for mets, Radiotherapy
353	45	2011-11-30	IDC	3	24	Absent	Negative	Not stated	Negative	Not stated	Negative	Not stated	24	Negative	1	0	T2 N0 MX		EC-D, Radiotherapy
3359	94	Not stated	IDC	3	29	Not stated	Negative	Not stated	Negative	Not stated	Negative	Not stated	29	Positive	Not stated	5	Not stated		None
2309	80	Not stated	IDC	3	10	Not stated	Negative	Not stated	Negative	Not stated	Negative	Not stated	10	Negative	Not stated	0	T1 N0 MX		No treatment details available
2429	45	2015-01-07	IDC	3	40	Present High	Negative	0	Negative	0	Negative	0	40	Positive	2	1*	T2 N1 MX*		EC-D, Radiotherapy
2667	29	2015-04-30	IDC	3	55	Absent	Negative	0	Negative	0	Negative	0	55	Positive	19	1	Not stated	EC-D	Carboplatin & Gemcitabine, Radiotherapy
4580	55	2016-11-10	IDC	3	40	Absent	Negative	0	Negative	0	Negative	0	40	Negative	4	0	T2 N0 MX	EC-D
4617	85	2016-07-14	IDC	3	45	Present High	Negative	0	Negative	0	Negative	0	45	Positive	9	1	T3 N1 MX*		No treatment details available
4683	83	2016-10-13	IDC	3	33	Present High	Negative	0	Negative	0	Negative	0	33	Negative	1	0	T2 N0 Mx		No treatment details available
4702	72	2016-11-03	IDC	3	40	Absent	Negative	0	Negative	0	Negative	1+	40	Positive	28	1	T2 N1 MX		EC90
3591	73	2015-10-21	IDC	3	65	Present High	Negative	0	Negative	0	Negative	Not stated	65	Negative	1	0	T3 N0 MX		No treatment details available
4563	66	2016-05-18	IDC	3	32	Absent	Negative	0	Negative	0	Negative	0	32	Positive	35	6	T2 N1 MX	EC-D
1740	77	Not stated	IDC	3	45	Not stated	Negative	Not stated	Negative	Not stated	Negative	Not stated	45	Positive	Not stated	8	Not stated		Adjuvant Radiotherapy
2290	53	Not stated	IDC	3	30	Not stated	Negative	Not stated	Negative	Not stated	Negative	Not stated	30	Negative	Not stated	0	T2 N0 MX		EC-D, Radiotherapy
4091	47	2016-03-02	Metaplastic	3	55	Present High	Negative	Not stated	Negative	Not stated	Negative	0	55	Positive	36	4	T3 T2 MX		Anastrozole, Radiotherapy
																		FEC = 5 Fluorouracil (5-FU) + Epirubicin + Cyclophosphamid; FEC-T = followed by Taxotere (Docetaxel); EC = Epirubicin + Cyclophosphamide; EC-D = followed by Docetaxol
